# Supplementary material for: A comprehensive analysis of Candida albicans phosphoproteome reveals dynamic changes in phosphoprotein abundance during hyphal morphogenesis
Source: Springer Nature journal article supplement (doi:10.1007/s00253-018-9303-z), 2018-08-18
Supplement: MOESM2 [file 253_2018_9303_MOESM2_ESM.xlsx]

## Sheet: Title Page
Supplementary Tables
Applied Microbiology and Biotechnology
A comprehensive analysis of Candida albicans phosphoproteome reveals dynamic changes in phosphoprotein abundance during hyphal morphogenesis
Priyanka Ghorai1,2, Mohammad Irfan1, Alka Narula2, Asis Datta1*
1National Institute of Plant Genome Research, Aruna Asaf Ali Marg, New Delhi – 110067, India
2Department of Biotechnology, Faculty of Science, Jamia Hamdard, Hamdard Nagar, New Delhi – 110062, India
*Corresponding author
Asis Datta
National Institute of Plant Genome Research
Aruna Asaf Ali Marg
New Delhi 110067, India
E-mail: asis_datta@rediffmail.com
Tel.: +91-11-26742750
Fax: +91-11-26741658
Supplementary Table S1. Catalog of differentially phosphorylated proteins in different hypha-inducing conditions after treatment with elevated temperature (40°C), serum (fetal calf serum) and GlcNAc. Among these, 60, 20 and 53 proteins were uniquely phosphorylated at higher temperature, serum and GlcNAc treated samples respectively.
Supplementary Table S2. Catalog of protein kinases identified in Candida albicans. In silico mining of protein kinases using Hidden Markov model-based approach identified the presence of proteins belonging to PK superfamily.
Supplementary Table S3. Summary of orthologous protein kinase-encoding genes between C. albicans and C. dubliniensis.
Supplementary Table S4. Summary of orthologous protein kinase-encoding genes between C. albicans and C. glabrata.

## Sheet: Supplementary Table S1
Supplementary Table S1: Catalog of differentially phosphorylated proteins in different hypha-inducing conditions after treatment with elevated temperature (40°C), serum (fetal calf serum) and GlcNAc. Among these, 60, 20 and 53 proteins were uniquely phosphorylated at higher temperature, serum and GlcNAc treated samples respectively.
Condition	Protein ID	P-sites	number of phosphorylation sites				Molecular weight (Da)	pI	Instability index*	Stable or unstable*	Gene Name
			Total	Serine (S)	Threonine (T)	Tyrosine (Y)					Gene Name
Temperature	C4YI53	S117,S118,S177,S184,S191,S200,S204,S326,S336,S339,S348,S166,S187,T194,T351,S189,S333,T334	18	15	3	0	49144.1	5.54	45.99	Unstable	SUB2
	A0A0A6MJ05	S10,S14,S756,S9,T645,S20,T19,S21,T12,T13	10	6	4	0	41737	5.45	40.87	Unstable	ACT1
	C4YMP9	S155,S26,S63,S80,T47,S76,T79	7	5	2	0	18968.2	4.55	27.97	Stable	TPM2
	A0A0A6PGY8	S116,S124,S140,S147,S87,S93,S98	7	7	0	0	10201.2	5.76	35.39	Stable	TIM9 (orf19.6696)
	Q5AF98	S129,S364,S48,S400,S403,T404	6	5	1	0	48346.2	8.49	45.77	Unstable	ZUO1
	Q5AJZ6	S95,S100,T104,S106,S112,T110	6	4	2	0	25752.5	5.31	26.15	Stable	RIB5 (orf19.4024)
	Q5ALQ9	S109,S251,T209,T211,T55,T57	6	2	4	0	40623.7	6.14	31.73	Stable	ARO3 (orf19.1517)
	Q5A6A1	S133,S36,S7,S9,T19	5	4	1	0	17382.4	11.37	36.89	Stable	RPL24A
	Q5AEN2	S73,T139,T44,T80,T83	5	1	4	0	21745.5	9.52	21.39	Stable	RPL9B
	C4YES6	S23,S24,S62,S90,S94	5	5	0	0	20308.2	5.11	24.67	Stable	C1_03510C_A (orf19.3053)
	P34731	S2,S31,S4,S6,S5	5	5	0	0	227794	5.71	35.23	Stable	FAS1
	Q5A3X4	S13,S15,S252,T249	4	3	1	0	27740.5	5.82	37.03	Stable	PRE8 (orf19.7335)
	Q59R18	S103,S104,S218,S4	4	4	0	0	62245.5	5.82	39.9	Stable	DED81
	C4YEV7	S291,S293,S323,S61	4	4	0	0	43537.6	4.91	31	Stable	ECM33
	C4YL77	S10,S30,T29,T31	4	2	2	0	61278.2	9.03	34.37	Stable	DBP2
	Q5A0Z9	S133,S293,S312	3	3	0	0	44173.4	8.16	37.53	Stable	PDA1
	Q5AK16	S252,S528,S79	3	3	0	0	58639.8	5.86	46.53	Unstable	CCT3
	Q59KX4	S46,S5,T47	3	2	1	0	24931.8	5.32	36.19	Stable	YPT31 (orf19.2622)
	A0A0A6MGW1	S13,S14,S18	3	3	0	0	70578.1	4.78	44.38	Unstable	MDG1 (orf19.7239)
	A0A0A6MJ66	Y145,S147,S148	3	2	0	1	37632.2	6.04	36.93	Stable	GRP2 (orf19.4309)
	A0A0A6P843	S118,S120,S6	3	3	0	0	23478	4.25	34.9	Stable	EFB1 (orf19.3838)
	A0A0A6QCC1	S120,S2,S33	3	3	0	0	16944.4	5.65	24.48	Stable	DUT1 (orf19.3322)
	C4YLT2	S88,S87,T90	3	2	1	0	55550.2	6.26	24.59	Stable	UGP1
	Q5A0T8	S133,S145,Y147	3	2	0	1	39848.2	6.67	31.32	Stable	IDH2 (orf19.5791)
	Q5AC45	S11,S30,S78	3	3	0	0	40625.3	6.2	46.57	Unstable	C6_03380W_A (orf19.5627)
	Q5AGX8	S168,S171	2	2	0	0	50060	5.72	42.74	Unstable	LAT1
	Q5ADU2	S127,S440	2	2	0	0	67705.6	5.51	37.25	Stable	KRS1
	Q5AAL2	S15,T59	2	1	1	0	24204.9	5.39	29.23	Stable	YRB1 (orf19.7477)
	Q5A8Z3	S270,S72	2	2	0	0	70790.3	5.8	34.61	Stable	C1_01530C_A (orf19.3341)
	Q5AGF6	S271,S54	2	2	0	0	58574.7	5.28	45.78	Unstable	GCD11
	Q59V92	S291,S312	2	2	0	0	36808.7	8.91	43.42	Unstable	SIS1
	Q59QB7	S396,S7	2	2	0	0	60064.6	6.23	33.43	Stable	TCP1
	Q9HFQ5	S44,S98	2	2	0	0	10857.3	3.9	43.97	Unstable	RPP2A
	Q5AGU9	S51,S64	2	2	0	0	13324	4.97	27.4	Stable	HSP12 (orf19.3160)
	C4YIT3	S31,S84	2	2	0	0	160100	5.32	30.71	Stable	ECM17
	C4YR46	T39,S41	2	1	1	0	116920	5.52	35.27	Stable	CEF3
	Q59MF7	S94,S97	2	2	0	0	48587.6	6.49	21.39	Stable	IDP1 (orf19.5211)
	Q59R31	S179,T178	2	1	1	0	52814	5.67	44.49	Unstable	ARG4
	Q59RJ3	S161,Y157	2	1	0	1	17391.6	5.72	36.3	Stable	C6_04420W_A (orf19.2125)
	Q5AFL1	S500	1	1	0	0	82585.1	6.52	28.55	Stable	GUS1 (orf19.7057)
	Q5A7A0	S624	1	1	0	0	85942.7	5.15	34.97	Stable	ADE5,7 (orf19.5061)
	Q59T35	S76	1	1	0	0	54340.8	7.66	31.89	Stable	OSM1
	Q5A2T2	S84	1	1	0	0	68096.5	5.96	36.79	Stable	KRE30
	Q59M73	Y13	1	0	0	1	14473.4	10.25	37.93	Stable	RPL23A (orf19.3504)
	A0A0A3BNJ9	S230	1	1	0	0	75912.8	9.81	52.99	Unstable	GZF3 (orf19.2842)
	A0A0A3ZPG5	S23	1	1	0	0	102171	6.17	30.27	Stable	MIS11 (orf19.2364)
	A0A0A6JLL1	S19	1	1	0	0	70415	5.22	46.87	Unstable	PAB1 (orf19.3037)
	A0A0A6L5F7	S197	1	1	0	0	13738.6	10.75	39.29	Stable	C1_06890C_A (orf19.6220.4)
	A0A0A6L7F9	T50	1	0	1	0	134022	5.11	45.84	Unstable	SLK19 (orf19.6763)
	A0A0A6LWQ7	S55	1	1	0	0	26610.3	5.74	23.72	Stable	TPI1 (orf19.6745)
	A0A0A6MLY5	S417	1	1	0	0	53940.2	5.06	31.07	Stable	ATP2 (orf19.5653)
	A0A0A6NLB3	S42	1	1	0	0	169390	6.15	32.44	Stable	ARO1 (orf19.4704)
	A0A0A6PG62	T204	1	0	1	0	67604.7	5.17	30.54	Stable	TFP1 (orf19.1680)
	C4YL12	T118	1	0	1	0	66833.8	5.23	40.32	Unstable	FRS1
	Q59MZ5	S114	1	1	0	0	150804	5.1	34.19	Stable	ADE6
	Q59YX6	S4	1	1	0	0	65947	5.22	32.44	Stable	STI1 (orf19.3192)
	Q5A4P6	S116	1	1	0	0	17687.3	4.94	34.09	Stable	HCH1 (orf19.3396)
	Q5AAL1	S88	1	1	0	0	56139.8	8.64	38.16	Stable	COQ1 (orf19.7478)
	Q5AAQ5	S173	1	1	0	0	235357	6.07	34.23	Stable	GLT1 (orf19.6257)
	Q5ADI3	S36	1	1	0	0	74558.7	4.81	30.71	Stable	KAR2 (orf19.2013)
Serum	A0A0A6JJJ0	S10,S103,S141,S170,S175,S228,S246,S543,S598,S96,T600,S166,T106,T156,T172	15	11	4	0	48423.8	9.26	37.18	Stable	CEF3 (orf19.4152)
	Q59QZ9	S458,S431,S434,T41,T265,S268,T269,S37,T39	9	5	4	0	67181.9	9.41	34.38	Stable	BRE5 (orf19.1086)
	Q59K68	S10,S571,S526,S527,S673,S676,S677,T675	8	7	1	0	50009.8	9.14	27.27	Stable	TEF1 (orf19.1435)
	Q59PA2	S106,S114,S115,S81,S89,S90,S94	7	7	0	0	31645.6	6.23	32.91	Stable	WWM1 (orf19.1414)
	C4YIL8	S10,S16,S41,S50,S54,T39,T52	7	5	2	0	55442.3	6.54	31.07	Stable	CDC19
	Q5ANP6	S185,S264,S279,T265,T152,S155	6	4	2	0	31960.5	8.7	36.57	Stable	SBP1
	C4YQN5	S147,S158,S23,S84,T58	5	4	1	0	29070.7	9.14	48.98	Unstable	CAWG_02794,orf19.5943.1
	A0A0A6PSB7	S291,S293,S323,S61	4	4	0	0	97376.3	4.6	61.81	Unstable	ERB1 (orf19.1047)
	Q59XE4	S185,T159,S163	3	2	1	0	75461.8	8.94	60.15	Unstable	NRD1 (orf19.581)
	Q5ABP4	S489,T492	2	1	1	0	69621	5.99	50.19	Unstable	CMP1 (orf19.6033)
	A0A0A4CY57	S2,S5	2	2	0	0	11608.3	10.15	31.73	Stable	RPS25B (orf19.6663)
	Q5A362	S166	1	1	0	0	42890.6	6.2	38.43	Stable	CYS3
	Q59UT2	S288	1	1	0	0	91896.4	5.3	46.49	Unstable	HIS4 (orf19.5639)
	A0A0A3BRH2	S36	1	1	0	0	244681	5.56	39	Stable	URA2 (orf19.2360)
	A0A0A4A9D9	Y15	1	0	0	1	49070.4	5.36	33.75	Stable	SAH1 (orf19.3911)
	A0A0A6LA06	T315	1	0	1	0	84218	5.96	30.66	Stable	ACO1 (orf19.6385)
	A0A0A6PJ89	T213	1	0	1	0	119789	5.69	54.1	Unstable	TIF4631 (orf19.3599)
	C4YJQ8	Y184	1	0	0	1	93350.6	6.07	31.15	Stable	EFT2
	C4YM67	S245	1	1	0	0	61183.8	5.97	24	Stable	PGI1
	Q5A6L1	S110	1	1	0	0	50075.2	5.87	35.44	Stable	FUM11
GlcNAc	C4YMM9	T3806,S3818,S1045,S1222,S1276,S1397,S1427,S1429,S1555,S1916,S1996,S284,S303,S389,S398,S458,S462,S529,S530,S666,S953,S985,T288,T307,T374,T445,S283,T280,S387,S402,S465,S503,S506,T936,S939,S962,S968,T463,T392	39	30	9	0	84218	5.96	30.66	Stable	ACO1
	Q59S96	S155,T135,T137,S114,S116,S18,S21,S38,S54,T103,T109,T120,T127,T39,T40,T64,T66,T68,T70,T77,T79,T81,S16,T41,T55,T15	26	8	18	0	19651.5	4.78	44.21	Unstable	(orf19.3475)
	A0A0A6JJJ0	S10,S109,S11,S111,S13,S14,S140,S213,S384,S41,S54,T12,S178,S188,Y183,S191,T137,T138	18	14	3	1	116920	5.52	35.27	Stable	CEF3 (orf19.4152)
	C4YR86	S501,T112,T492,S495,S1048,S511,S516,S525,S530,S531,S63,S512,S519,T518,S521,T515	16	12	4	0	58002.6	6.42	41.46	Unstable	ACH1
	C4YGU8	S102,S119,S8,S84,S88,S93,T388,T647,T80,S100,T86	11	7	4	0	40529.8	5.4	36.82	Stable	LYS1
	A0A0A6MJ05	S10,S14,S756,S9,T645,S20,T19,S21,T12,T13	10	6	4	0	41737	5.45	40.87	Unstable	ACT1
	Q59QZ9	S458,S431,S434,T41,T265,S268,T269,S37,T39	9	5	4	0	67181.9	9.41	34.38	Stable	BRE5 (orf19.1086)
	Q59K68	S10,S571,S526,S527,S673,S676,S677,T675	8	7	1	0	50009.8	9.14	27.27	Stable	TEF1 (orf19.1435)
	Q59PA2	S106,S114,S115,S81,S89,S90,S94	7	7	0	0	31645.6	6.23	32.91	Stable	WWM1 (orf19.1414)
	C4YMP9	S155,S26,S63,S80,T47,S76,T79	7	5	2	0	18968.2	4.55	27.97	Stable	TPM2
	C4YIL8	S10,S16,S41,S50,S54,T39,T52	7	5	2	0	55442.3	6.54	31.07	Stable	CDC19
	A0A0A6I1U4	S294,S306,S324,T288,T296,S309,T310	7	4	3	0	125406	5.53	36.42	Stable	CDC60 (orf19.2560)
	Q5ANP6	S185,S264,S279,T265,T152,S155	6	4	2	0	31960.5	8.7	36.57	Stable	SBP1
	A0A0A6JEZ8	S82,S33,S42,S108,S112,T49	6	5	1	0	39210.7	10.75	34.9	Stable	RPL4B (orf19.7217)
	C4YQN5	S147,S158,S23,S84,T58	5	4	1	0	29070.7	9.14	48.98	Unstable	(orf19.5943.1) C3_04810C_A
	Q59W54	S10,S2,T4,T7,T90	5	2	3	0	11148.9	5.3	47.1	Unstable	SMT3
	A0A0A3WX23	S13,T14,T20,S418,T389	5	2	3	0	66446.4	5.25	36.59	Stable	SSB1 (orf19.6367)
	Q5A3X4	S13,S15,S252,T249	4	3	1	0	27740.5	5.82	37.03	Stable	PRE8 (orf19.7335)
	A0A0A6PSB7	S291,S293,S323,S61	4	4	0	0	97376.3	4.6	61.81	Unstable	ERB1 (orf19.1047)
	Q9P457	S53,T70,S29,S32	4	3	1	0	7746.44	8.28	58.56	Unstable	CRD2
	Q5A5Q8	S43,S25,T24,S29	4	3	1	0	29363.1	10.15	19.82	Stable	RPS4A
	Q5ANA1	S10,S766,S9,S12	4	4	0	0	28497.2	10.06	35.75	Stable	RPL8B
	Q59XE4	S185,T159,S163	3	2	1	0	75461.8	8.94	60.15	Unstable	NRD1 (orf19.581)
	C4YQP9	S13,S19,T56	3	2	1	0	14085.2	11.24	49.54	Unstable	RPL35
	C4YJX2	S145,S50,S87	3	3	0	0	21719.2	10.19	54.89	Unstable	RPS9B
	Q5A2A5	S386,S619,S651	3	3	0	0	73711.1	5.5	38.14	Stable	GRS1
	A0A0A6JXU4	S76,S77,S92	3	3	0	0	118258	5.83	52.72	Unstable	TIF4631 (orf19.3599)
	C4YEL8	S2,T49,T55	3	1	2	0	14102.6	10.1	30.74	Stable	HTB2
	Q5AGX8	S168,S171	2	2	0	0	50060	5.72	42.74	Unstable	LAT1
	Q59UQ4	S142,S131	2	2	0	0	16648.8	5.5	50	Unstable	orf19.5666
	Q5A0L0	S16,T408	2	1	1	0	47435.1	5.03	37.4	Stable	RNR21
	Q5AF97	S172,S67	2	2	0	0	24620.8	4.68	41.37	Unstable	GLC8 (orf19.2710)
	Q5ABD7	S482,S489	2	2	0	0	69621	5.99	50.19	Unstable	CMP1 (orf19.6033)
	Q5ALV6	S54,S57	2	2	0	0	13570.4	10.89	50.22	Unstable	RPS26A
	A0A0A4BWY4	S78,S82	2	2	0	0	121273	5.25	39.88	Stable	(orf19.338)
	C4YCU6	T122,T55	2	0	2	0	7111.94	11	10.4	Stable	RPL29
	C4YL27	S348,S677	2	2	0	0	25386.2	5.36	36.22	Stable	VMA4
	C4YR68	S495,T492	2	1	1	0	65947	5.22	32.44	Stable	STI1
	Q59NZ2	S1026,S1024	2	2	0	0	11608.3	10.15	31.73	Stable	RPS25B (orf19.6663)
	Q5AEJ9	S115	1	1	0	0	52458.5	5.77	44.36	Unstable	SES1 (orf19.269)
	Q5A9E1	S161	1	1	0	0	27233.5	5.64	41.05	Unstable	MGE1
	Q5A4I4	S39	1	1	0	0	20544.5	5.98	60.96	Unstable	RCT1 (orf19.7350)
	Q5AFL8	S76	1	1	0	0	30497.6	5.22	63.31	Unstable	NOP15 (orf19.7050)
	C4YIL5	S99	1	1	0	0	12966.6	9.82	46.08	Unstable	(orf19.3572.3)
	A0A0A6LSR5	S720	1	1	0	0	16945.1	10.23	45.68	Unstable	RPS13 (orf19.4193.1)
	A0A0A6MRU7	S647	1	1	0	0	22613.6	4.27	55.97	Unstable	DDR48 (orf19.4082)
	A0A0A6P666	S30	1	1	0	0	75792.5	5.65	35.88	Stable	SEP7 (orf19.3680)
	A0A0A6Q7P5	T279	1	0	1	0	12179.6	9.67	29.5	Stable	CYC1 (orf19.1770)
	A0A0A6PM60	S2	1	1	0	0	14102.6	10.1	30.74	Stable	WH11 (orf19.3548.1)
	C4YCR6	T47	1	0	1	0	10075.3	11.79	61.78	Unstable	RPL37B
	C4YJ73	T302	1	0	1	0	50304	5.29	44.65	Unstable	BCY1
	C4YMQ1	T185	1	0	1	0	6600.29	9.84	17.82	Stable	(orf19.6415.1)
	C4YNI2	S87	1	1	0	0	18557	4.3	14.83	Stable	TMA19
*Stability or instability is one of the physicochemical properties of a protein which can be defined according to its instability index value (prediction of regional instability by calculating the weighted sum of dipeptides). If instability index is lower than 40 then the protein is stable and if higher then it is instable.

## Sheet: Supplementary Table S2
Supplementary Table S2: Catalog of protein kinases identified in Candida albicans. In silico mining of protein kinases using Hidden Markov model-based approach identified the presence of proteins belonging to PK superfamily.
Kinase ID	Gene ID	Physical position on C. albicans genome			Sequence information			Protein properties
		Chromosome	Start position (bp)	End Position (bp)	Genomic	Transcript	Protein	Gene name/ Annotation	Molecular weight (Da)	pI	Instability index	Stable or unstable
C1_00950C_ST01	C1_00950C_A	chr1A	191444	193405	ATGTCGGCGCTTCGTTCACAACCTTTACAGCCATTGAATAGTGGCCAGCTCAATGCTAGAGCTAATAACATTACTCCTGTCAAATCAATTAGACGCCCAAAGGAAAATGTTCAACCAACAGACCAAAAACAAAAGAAAAAGAAGGAAAAGTTATCGGCATTGTGCAAGACACCCCCATCTATAGTGAGAACTAGAAATGGACGAGACTATCGTCGAGGCAACTTTTTGGGTGAAGGAGGGTTTGCTCGTTGTTTTCAAATGAAGGATGCCTCTGGTCAAATCTATGCCGCCAAAACAGTCGCTAAGGCATCAATCAAAAACGAGAAAACAAAAACAAAACTATTATCAGAAATCAAAATTCACAAATCTTTGAGACATCCAAACATTGTTAACTTTGTT…	ATGTCGGCGCTTCGTTCACAACCTTTACAGCCATTGAATAGTGGCCAGCTCAATGCTAGAGCTAATAACATTACTCCTGTCAAATCAATTAGACGCCCAAAGGAAAATGTTCAACCAACAGACCAAAAACAAAAGAAAAAGAAGGAAAAGTTATCGGCATTGTGCAAGACACCCCCATCTATAGTGAGAACTAGAAATGGACGAGACTATCGTCGAGGCAACTTTTTGGGTGAAGGAGGGTTTGCTCGTTGTTTTCAAATGAAGGATGCCTCTGGTCAAATCTATGCCGCCAAAACAGTCGCTAAGGCATCAATCAAAAACGAGAAAACAAAAACAAAACTATTATCAGAAATCAAAATTCACAAATCTTTGAGACATCCAAACATTGTTAACTTTGTT…	MSALRSQPLQPLNSGQLNARANNITPVKSIRRPKENVQPTDQKQKKKKEKLSALCKTPPSIVRTRNGRDYRRGNFLGEGGFARCFQMKDASGQIYAAKTVAKASIKNEKTKTKLLSEIKIHKSLRHPNIVNFVDCFEDDVNVYILLEICPNQSLMELLKTRKRVSEPEVRFFMVQIVGAIKYLHSRRVIHRDLKLGNIFFDPEMNLKIGDFGLASVLPSTDSRKYTICGTPNYIAPEVLGGKNTGHSFEVDIWAIGIMMYALLVGKPPFQAKDVNVIYERIKKTEYYFPEDKPISESAKQLIKDLLSLNPLHRPTIDEILSYDWFKGPFPDKTYEVSLQTLPPGLDQITRAQSSANFKYAKDSAGIYTPKNKNPVEILRADLHSEQPRTLLPSSLSPND…	CDC5, Polo-like kinase; member of conserved Mcm1 regulon; depletion causes defects in spindle elongation and Cdc35-dependent filamentation; virulence-group-correlated expression; likely essential (UAU1 method); Spider biofilm repressed	75016.2	9.3	40.61	Unstable
C1_02120C_ST02	C1_02120C_A	chr1A	442448	444235	ATGACACTCGATATATTACCAATATTTGATACGCACACTAAACATCACTATGTAAGTAGTGGAGCTACCAGTACTACAGATAATACCACTACATTTACTTCAGCCACTATTTACCAACCACAAACTACCACAAGCAGTAATAAACCAAATGTAAACTGTTTATTAAATGGATATATGTTAAACCATGAACTTCGGTTTATCAGAAAAATTGGTGCTGGTACCTATGGTTTGATTTACCTTGTGGAAAATATCTACACTAAACAACAATTTGCTGCTAAAATGGTTCTTGAACAGCCATTACTCAAACAAAAGCAACAACAACAACAAAGTCATCATGGACATAAAGGAGAATCTAGTATGAACAAACAAATAATACTGCAAGAATTTTATCAATATTTT…	ATGACACTCGATATATTACCAATATTTGATACGCACACTAAACATCACTATGTAAGTAGTGGAGCTACCAGTACTACAGATAATACCACTACATTTACTTCAGCCACTATTTACCAACCACAAACTACCACAAGCAGTAATAAACCAAATGTAAACTGTTTATTAAATGGATATATGTTAAACCATGAACTTCGGTTTATCAGAAAAATTGGTGCTGGTACCTATGGTTTGATTTACCTTGTGGAAAATATCTACACTAAACAACAATTTGCTGCTAAAATGGTTCTTGAACAGCCATTACTCAAACAAAAGCAACAACAACAACAAAGTCATCATGGACATAAAGGAGAATCTAGTATGAACAAACAAATAATACTGCAAGAATTTTATCAATATTTT…	MTLDILPIFDTHTKHHYVSSGATSTTDNTTTFTSATIYQPQTTTSSNKPNVNCLLNGYMLNHELRFIRKIGAGTYGLIYLVENIYTKQQFAAKMVLEQPLLKQKQQQQQSHHGHKGESSMNKQIISQEFYQYFLNNSMPQPRNLDLNYLRDNGHDCPFLTEISLHLKVHQHPNIATIHQVLNIEDFAIIILMDHFEQGDLFTNIIDRQIFTNNSHRKVPRTDFETQLLMKNAMLQLIEAIEYCHENNIYHCDLKPENIMVRYNPYYVRPTINNNNNNGEDDLCYANSIIDYNELHLVLIDFGLAMDSATICCNSCRGSSFYMAPERTTNYNTHRLINQLIDMNQYESIEINGTTVTKSNCKYLPTLAGDIWSLGVLFINITCSRNPWPIASFDNNQNNE…	SHA3, Putative ser/thr kinase involved in glucose transport; Tn mutation affects filamentous growth; fluconazole-induced; ketoconazole-repressed; induced in by alpha pheromone in SpiderM; possibly essential; flow model biofilm induced	69324.8	5.22	51.71	Unstable
C1_03470C_ST03	C1_03470C_A	chr1A	731029	732438	ATGAGAATCATTAAAGATAAGAAACAGACAGTTCCACTCGATTCCCCGTATATCTCATCATCTTCACCACTGAGCGGACAAAGCTCAAATTATGTGTTATCAAAATGTATTGGAAGAGGCAATTTTGGTGATGTCTATAGGGCACAACAAGTTTCAACAAATAGATTGGTGGCAATCAAAGTGGTCAATTTGGATGAATCCCCAGACGATATCAAGCAAATCATCAAAGAGATCCATTTCTTGTCCCGCTTACGCAATCCATATATAATTCGCTATATTGAAAGTTTTTCACAAGAATATAACATGTATATTGTCATGGAATATTGTGGTGGAGGATCTTGTTCCGATTTGCTCAAGTATCATAAAAAGTTACCTGAAGAGATTGTTGGTTATATCATT…	ATGAGAATCATTAAAGATAAGAAACAGACAGTTCCACTCGATTCCCCGTATATCTCATCATCTTCACCACTGAGCGGACAAAGCTCAAATTATGTGTTATCAAAATGTATTGGAAGAGGCAATTTTGGTGATGTCTATAGGGCACAACAAGTTTCAACAAATAGATTGGTGGCAATCAAAGTGGTCAATTTGGATGAATCCCCAGACGATATCAAGCAAATCATCAAAGAGATCCATTTCTTGTCCCGCTTACGCAATCCATATATAATTCGCTATATTGAAAGTTTTTCACAAGAATATAACATGTATATTGTCATGGAATATTGTGGTGGAGGATCTTGTTCCGATTTGCTCAAGTATCATAAAAAGTTACCTGAAGAGATTGTTGGTTATATCATT…	MRIIKDKKQTVPLDSPYISSSSPSSGQSSNYVLSKCIGRGNFGDVYRAQQVSTNRLVAIKVVNLDESPDDIKQIIKEIHFLSRLRNPYIIRYIESFSQEYNMYIVMEYCGGGSCSDLLKYHKKLPEEIVGYIIHRVLLGLQYLHQEHKVHRDIKSANILLTELGQVKLGDFGVSTEITMTKMKKNTFVGTPFWMAPEVITRAKLIEGNVKNCVNSNGNYNGGNTGYNEKADIWSTGITTIELVTGSPPLSQYDPLKILFDIPKKRPPSLSGIDFSDNIKSFVKHCLIKEPDKRSSATALLQHKFFKACVTEDVQARLINLISLKIANDDHRAGYKPRFRISGKLDNGKENLEAPIEWEFTNTLIQQQKTTPRSPLLEEVDEFIDDSSSNYPSNVLEQNN…	SPS1, Ortholog(s) have protein kinase activity, role in ascospore wall assembly, protein phosphorylation and cell division site, cytosol, nucleus localization	53313.2	8.15	43.33	Unstable
C1_04520C_ST04	C1_04520C_A	chr1A	932754	933831	ATGACCGGCTCGTCTTCTCAGTATGTTGAAATTTTTTTTTCCAATATTTCGATTTATCTGCTTTGAATCTGTCTACTAACTAATTATTTTTTACTATAGATTTCAGCAACTTGAAAAATTGGGTGAAGGTACTTATGCCACCGTGTACAAGGGAAGAAATAGGGCCACAGGTGCTTTGGTGGCATTAAAAGAAATTAGTCTAGATTCAGAAGAAGGTACACCATCTACTGCTATTAGAGAAATTTCATTAATGAAAGAATTGGACCATGAGAATATTGTAACTTTGTATGATGTGATCCACACTGAGAATAAGTTGACATTAGTATTTGAATATATGGATAAAGATTTGAAGAAATATATGGAAGTTCATGGACAACAAAGTGCATTAGACTTGAAAGT…	ATGACCGGCTCGTCTTCTCAATTTCAGCAACTTGAAAAATTGGGTGAAGGTACTTATGCCACCGTGTACAAGGGAAGAAATAGGGCCACAGGTGCTTTGGTGGCATTAAAAGAAATTAGTCTAGATTCAGAAGAAGGTACACCATCTACTGCTATTAGAGAAATTTCATTAATGAAAGAATTGGACCATGAGAATATTGTAACTTTGTATGATGTGATCCACACTGAGAATAAGTTGACATTAGTATTTGAATATATGGATAAAGATTTGAAGAAATATATGGAAGTTCATGGACAACAAAGTGCATTAGACTTGAAAGTTGTCAAGTCTTTTATGTTTCAATTGTTGAAAGGAATAATGTTCTGTCATGACAATCGAGTTTTACATCGTGATTTGAAA…	MTGSSSQFQQLEKLGEGTYATVYKGRNRATGALVALKEISLDSEEGTPSTAIREISLMKELDHENIVTLYDVIHTENKLTLVFEYMDKDLKKYMEVHGQQSALDLKVVKSFMFQLLKGIMFCHDNRVLHRDLKPQNLLINNKGELKLGDFGLARAFGIPFNTFSNEVVTLWYRAPDVLLGSRAYTTSIDIWSAGCIFAEMCTGKPLFPGTANEDQLIKIFRLMGTPNERTWPGISQYTNYKNNWQIFVPQDLRLIVPNLDSMGLNLLQSLLQMRPESRITARQALQHPWFHEITMPNAVPQHLSDPYQQQQQQQQQQQQQQHPHQPIIDQQY	PHO85, Functional homolog of S. cerevisiae Pho85p, a cyclin-dependent kinase that regulates transcription of PHO genes involved in phosphate metabolism; necessary for geldanamycin-induced filamentation; gene has intron	38138.3	6.37	41.46	Unstable
C1_04780C_ST05	C1_04780C_A	chr1A	994377	997034	ATGTTGAGTAGATTGGGATTTAGCACAGGTATACGATCCATTTACAGTGTTCTGGACCAACCATCCTTTGTTTCTGAACCATGGGCTATTTATCCTGCTAAACACAAGACCAATGGAAAAATTGTTTCAGTTTTCATTTTTGACAAATCAAAATTTGAAACCCAAGTTAGTAGGTTGCATACTACTTCTTCGAGTGTGAAAAATCCTAAAGTAGTGATAAGTGAATGCTATGAATTGATAAAATATGAAGTTAGTCAATTAAGTAAATTGAAACATCCACAATTATTACAAGTTTATGAAGTATTAGAAGAAACCAAATCAAAATTCTTATTTGTTACTGAACCTGTGATTGATAATTTAGTTACGGTGAATCCAAAAGATTTAGATGATTTATCTATT…	ATGTTGAGTAGATTGGGATTTAGCACAGGTATACGATCCATTTACAGTGTTCTGGACCAACCATCCTTTGTTTCTGAACCATGGGCTATTTATCCTGCTAAACACAAGACCAATGGAAAAATTGTTTCAGTTTTCATTTTTGACAAATCAAAATTTGAAACCCAAGTTAGTAGGTTGCATACTACTTCTTCGAGTGTGAAAAATCCTAAAGTAGTGATAAGTGAATGCTATGAATTGATAAAATATGAAGTTAGTCAATTAAGTAAATTGAAACATCCACAATTATTACAAGTTTATGAAGTATTAGAAGAAACCAAATCAAAATTCTTATTTGTTACTGAACCTGTGATTGATAATTTAGTTACGGTGAATCCAAAAGATTTAGATGATTTATCTATT…	MLSRLGFSTGIRSIYSVSDQPSFVSEPWAIYPAKHKTNGKIVSVFIFDKSKFETQVSRLHTTSSSVKNPKVVISECYELIKYEVSQLSKLKHPQLLQVYEVLEETKSKFLFVTEPVIDNLVTVNPKDLDDLSIQKGLLQISKGLQFLHSYGSIIHLNLQPSSVYINNQGDWKLGGFKFLQNLNEISPQERENFYILNNMSVVPFANFNLNFTAPELIIDSHTKLDFANDIWSLGQLIYYLYNHHDLLINCFDANSISDYKQEFRKFEQKFYNHKPTELKYVLKDIPDKLYPLYPQILARYPHDRITLDQFMDSEFFNGSIIKAMWFIDEFSTKSIDEKLVFLKGLSEVDPQQSNNSPLISQFPPSFRSSKLLPLLIDLLTNELNVLTEAAIDPKTDELI…	orf19.764, Ortholog(s) have clathrin-coated vesicle, cytoplasm localization	100126	8.51	33.94	Stable
C1_05370C_ST06	C1_05370C_A	chr1A	1125926	1128109	ATGTCGATTATTCCTTACAATAATAACAAGGATGTACTTTATCACAACCCTAATGATGGGATTGTGGTTGTGCATGATCCTCGTGAAAACACTATAAAGCTACTATCCACCGTTGCATCCGAAGCACGGGGAGAATCAAATGGGAGTCAACGAACAAGGAGACCATCACAGGCCTTTAACAATGATCAATTCCCCCATACCACAAGCATGACAAAATGTCCCAACTGTGGGTTTACATGGAACGAATTCAATAAATCCGGGCCCAGAAGAAGCAGCTCGCATTCCTCCTCTGGCCTCTTCAATATATCATTACCCCAGGAATACTTATCACAGTCATTTATTCATACCGACTATTTCAAATTGTTAGGTAAACTACCTTCCAATGAGGAGCATGCGTGC…	ATGTCGATTATTCCTTACAATAATAACAAGGATGTACTTTATCACAACCCTAATGATGGGATTGTGGTTGTGCATGATCCTCGTGAAAACACTATAAAGCTACTATCCACCGTTGCATCCGAAGCACGGGGAGAATCAAATGGGAGTCAACGAACAAGGAGACCATCACAGGCCTTTAACAATGATCAATTCCCCCATACCACAAGCATGACAAAATGTCCCAACTGTGGGTTTACATGGAACGAATTCAATAAATCCGGGCCCAGAAGAAGCAGCTCGCATTCCTCCTCTGGCCTCTTCAATATATCATTACCCCAGGAATACTTATCACAGTCATTTATTCATACCGACTATTTCAAATTGTTAGGTAAACTACCTTCCAATGAGGAGCATGCGTGC…	MSIIPYNNNKDVLYHNPNDGIVVVHDPRENTIKLLSTVASEARGESNGSQRTRRPSQAFNNDQFPHTTSMTKCPNCGFTWNEFNKSGPRRSSSHSSSGLFNISLPQEYLSQSFIHTDYFKLLGKLPSNEEHACKSTLNNSLPEGVFNQGYFKRFFKKIDPYTLGSGAHAQVYKVNHILNNIVLGTYAVKRINIGGQLEFLQQVLNEVLILYELSTTGANENNLIRYNHVWLEMGELDDSNSIFFPTPKLADRRDMKVPYVFILQQYCDGGHLEDLIKCNFTIEENLTWKEKVELERKKRRAVKVGDETLPKRKQWLSTFEIWKFFHDVANGVNYLHQNGILHRDMKPSNCLLDVKYVPHEMKSTFESQEDFESHLYNLPRVLVSDFGEGKFIEKRQNVN…	IKS1, Putative serine/threonine kinase; induced during planktonic growth; rat catheter biofilm repressed	84179.8	5.36	44.13	Unstable
C1_06090C_ST07	C1_06090C_A	chr1A	1274861	1277509	ATGCCAAACACTAAATCCAAGCTTTCATTAGCTATACAACAGGCAGATTCTGAATCACAGCAACATCAACAACAACACCAACATCAGCATCATTCAAAACTTAACAGTTACAATCATCTCCATCAAGATCTTCCACAACAACAACAACAACAACAGCAAAAATCTAAAAAAACACAAACAAAATCTAACAATAATTTTAATCAATCTACCCCTATAACACCTATAAAGAATGCATCCACTGTATCGTCGCATGATATAAATCAATATCCTTCATCTAAAAGTTTTAATGAAAATTTTAAACCATCACCACTGTTATTACCAAATTTAATACAGCATAGTACTCCATATGTATCAACTACACCATCATCAGCAAAACATTTTAAACCGGAATTAACTGTT…	ATGCCAAACACTAAATCCAAGCTTTCATTAGCTATACAACAGGCAGATTCTGAATCACAGCAACATCAACAACAACACCAACATCAGCATCATTCAAAACTTAACAGTTACAATCATCTCCATCAAGATCTTCCACAACAACAACAACAACAACAGCAAAAATCTAAAAAAACACAAACAAAATCTAACAATAATTTTAATCAATCTACCCCTATAACACCTATAAAGAATGCATCCACTGTATCGTCGCATGATATAAATCAATATCCTTCATCTAAAAGTTTTAATGAAAATTTTAAACCATCACCACTGTTATTACCAAATTTAATACAGCATAGTACTCCATATGTATCAACTACACCATCATCAGCAAAACATTTTAAACCGGAATTAACTGTT…	MPNTKSKLSLAIQQADSESQQHQQQHQHQHHSKLNSYNHLHQDLPQQQQQQQQKSKKTQTKSNNNFNQSTPITPIKNASTVSSHDINQYPSSKSFNENFKPSPSLLPNLIQHSTPYVSTTPSSAKHFKPELTVLTTPITEKNLEDIYHNYDNDDYEQDFELKVNHKHNFKNINKSQTGNGEPSTLLGKEQEHLVEDIKNRMNPSNNSDEEDQADYDDKEDDDISDEEPVNPADEEDLKDYVPGGYHPCYIGEEYKNGKYTLVRKLGWGHFSTVWLARDNDKHCHVAMKVVRSAKHYTETAIDEIKLLDKVTTSDIHHPGHQHVIQLLDTFTHKGPNGVHVVMVFEVLGENLLGLIRRYKHRGIPVVFVKQIAKQLLSALDFLHRQCGVIHTDLKPENIL…	SKY1, Predicted protein serine/threonine kinase; Spider biofilm induced	99870.5	5.98	49.43	Unstable
C1_06360W_AGC01	C1_06360W_A	chr1A	1353982	1355679	ATGATAGATATATTTGATATGGAAGATGAAGTTTCTACATTAACTTCTCAACTTCATACTAAAATAGTTATTAGCCCTGCCCCATCATCTTCTACACAAGAATTAAATTATAAATTAATTGATGCCATCGATGAAGAAACTATAGCTAATGAAAAAGAAAAAGAAGAAGAAGAGGATGATGATTATGATGATGAAGATGATGACTATTTACCACAAGGGTATCAACCACAAATATCTTCTAGACCTATAAAAATCAATAATAACAGTAATAGACAACGAAGGAAATCATCAATAGTTTCATCATACGAAGTCAATATTACAAATTCTTATGTTTCTTCATCATTAATAATTGATAGATCACCAGGAATTGTTTCTAGTGGAGGAGGAGAAGGAGGAGGA…	ATGATAGATATATTTGATATGGAAGATGAAGTTTCTACATTAACTTCTCAACTTCATACTAAAATAGTTATTAGCCCTGCCCCATCATCTTCTACACAAGAATTAAATTATAAATTAATTGATGCCATCGATGAAGAAACTATAGCTAATGAAAAAGAAAAAGAAGAAGAAGAGGATGATGATTATGATGATGAAGATGATGACTATTTACCACAAGGGTATCAACCACAAATATCTTCTAGACCTATAAAAATCAATAATAACAGTAATAGACAACGAAGGAAATCATCAATAGTTTCATCATACGAAGTCAATATTACAAATTCTTATGTTTCTTCATCATTAATAATTGATAGATCACCAGGAATTGTTTCTAGTGGAGGAGGAGAAGGAGGAGGA…	MIDIFDMEDEVSTLTSQLHTKIVISPAPSSSTQELNYKLIDAIDEETIANEKEKEEEEDDDYDDEDDDYLPQGYQPQISSRPIKINNNSNRQRRKSSIVSSYEVNITNSYVSSSLIIDRSPGIVSSGGGEGGGGESNNNSKFVSSVISPPRLSDFEPIKVLGKGSYGKVLLVRQVSTGRLFAQKQLKKASLIINQQEQETDDDDEEEEVVVAGVKIHEKNYQRTLNEKQILELVNHPNIVKLFYAFQDNNKLYLILEYLQGGELFHHLAMEKFMSEKDSSYYIAQMLLGIRYLHLKLKVIYRDLKPENCLLNSFGNLVLTDFGLSKIAADNEDGTTKNHSITGTVQYMAPEILQGDPYDFAVDYWSLGCVAFDLLTGSPPFTGTNPKKILEKMKSIKKN…	orf19.6275, Ortholog(s) have ribosomal protein S6 kinase activity, role in TORC1 signaling, peptidyl-serine phosphorylation, protein autophosphorylation and cytosol localization	64304.1	4.99	53.77	Unstable
C1_06680W_PI3K01	C1_06680W_A	chr1A	1427895	1430957	ATGGCGACACTCTCACAACCACAAAGCGCACTACCTAAAACAAAGATAGCGACTACTTTTGGTTTGTCCAAGGATTTGAAATCGCCTATATCAGTTAAAGTTTGCTATTTGGAATGCACAAGAAATAATGTCTCTTTAGTCCCATTATCAACAAAATTTGAAGATCCAACTGTATTCAAGAAGCTATCTCAAATATATAAGAACTCGGATCTATTTGTTGAAATTAGAGTTTACGATGGTAAGAATAACAATCTAATCAGTACACCGGTGCGGACGTCTTACAAGGCATTTAACAACAAGGGAAGAACCTGGAATCAACAGTTGAAATTGAATATAGATTATAATCAAATATCAATTGATGCATACTTAAAGTTTTCTATTTGTGAAATCATTGATACC…	ATGGCGACACTCTCACAACCACAAAGCGCACTACCTAAAACAAAGATAGCGACTACTTTTGGTTTGTCCAAGGATTTGAAATCGCCTATATCAGTTAAAGTTTGCTATTTGGAATGCACAAGAAATAATGTCTCTTTAGTCCCATTATCAACAAAATTTGAAGATCCAACTGTATTCAAGAAGCTATCTCAAATATATAAGAACTCGGATCTATTTGTTGAAATTAGAGTTTACGATGGTAAGAATAACAATCTAATCAGTACACCGGTGCGGACGTCTTACAAGGCATTTAACAACAAGGGAAGAACCTGGAATCAACAGTTGAAATTGAATATAGATTATAATCAAATATCAATTGATGCATACTTAAAGTTTTCTATTTGTGAAATCATTGATACC…	MATLSQPQSALPKTKIATTFGLSKDLKSPISVKVCYLECTRNNVSLVPLSTKFEDPTVFKKLSQIYKNSDLFVEIRVYDGKNNNLISTPVRTSYKAFNNKGRTWNQQLKLNIDYNQISIDAYLKFSICEIIDTKPSVFGVSYLSLFSHDSSTLRSGSHKIPVFMEDDPQYSKNIQYGTLIGLTDLEKRLIDYENGKYPRLNWLDKMVLPKVDATFLKTNNKDHDYYLYIELPQFEFPIVYSDIIYQIPTIEPITETTSKIPPDDTLNSNIIINSIDIPMATSHDPSIMKVYDPDFHITANNHLNPNATTFDPVELKYRKLERNIDNNTILDKELKPTPQLRDELLRIMIKPSNAELTDNEKNLIWKFRYYFSKNNSGNDPSNKSVKSFLPKFLRSINWE…	VPS34, Autophosphorylated class III phosphatidylinositol 3-kinase; required for normal vesicle transport, hyphal growth, fibroblast adherence, virulence in mouse systemic infection; growth-regulated; caspofungin and hydrogen peroxide sensitivity	117465	6.63	40.5	Unstable
C1_06710W_ST08	C1_06710W_A	chr1A	1435371	1436402	ATGTCTACTGCAGCAGTTGCAACGAAACCATCTGTTACTTCAAAACCAGCAACTAAACAAGTTCTGAATTACACCAAAGAAAAAAAAGTAGGGGAAGGTACATATGCTGTTGTGTACTTGGGTAAACAAATCTCCACCAAACGGCAAATTGCCATCAAAGAAATCAAAACAGGATTATTCAAAGATGGATTGGATATGTCAGCATTAAGAGAAGTTAAATATTTGCAAGAATTGAAACATCCCAATGTTATTGAACTAGTAGATGTATTTTCAGCAACAAATAATTTAAATTTGGTATTAGAATTTTTACCTTGCGATTTGGAAGTGTTGATTAAAGATAAATCGATTGTTTTCAAATCAGCAGATATCAAATCATGGCTTCTAATGACATTACGTGGG…	ATGTCTACTGCAGCAGTTGCAACGAAACCATCTGTTACTTCAAAACCAGCAACTAAACAAGTTCTGAATTACACCAAAGAAAAAAAAGTAGGGGAAGGTACATATGCTGTTGTGTACTTGGGTAAACAAATCTCCACCAAACGGCAAATTGCCATCAAAGAAATCAAAACAGGATTATTCAAAGATGGATTGGATATGTCAGCATTAAGAGAAGTTAAATATTTGCAAGAATTGAAACATCCCAATGTTATTGAACTAGTAGATGTATTTTCAGCAACAAATAATTTAAATTTGGTATTAGAATTTTTACCTTGCGATTTGGAAGTGTTGATTAAAGATAAATCGATTGTTTTCAAATCAGCAGATATCAAATCATGGCTTCTAATGACATTACGTGGG…	MSTAAVATKPSVTSKPATKQVSNYTKEKKVGEGTYAVVYLGKQISTKRQIAIKEIKTGLFKDGLDMSALREVKYLQELKHPNVIELVDVFSATNNLNLVLEFLPCDLEVLIKDKSIVFKSADIKSWLLMTLRGIHHCHRNFILHRDLKPNNLLLAPDGQLKIADFGLARALVNPNEDLSSNVVTRWYRAPELLFGARHYTGAVDIWSIGIIFAELMLRIPYLPGKDDVDQLDVTFRAYGTPTEQIWPNVSSLPMYNALHVYPPPSRQELRNRFSAATEKALDLLISMTQLDPSRRCDSTLALLHDYFTESPRPTDPKKLPKKSSPEKRENEDEQNNGSKRRHV	KIN28, Putative serine/threonine protein kinase; possibly an essential gene, disruptants not obtained by UAU1 method	38834.2	9.11	41.09	Unstable
C1_06780W_ST09	C1_06780W_A	chr1A	1447122	1449623	ATGTCAACCGATATTGAAAATACACTGCAGCAAAGTCAACTGCCACAACAACCACAGCAGCAACAGCAACAACAACAGCAACAACAACCACAACAGCCAATGTCGTCCTTGACAAAGTTGCTACATGAATCGACCTCAACCCTAGCTTCTCCAGTGTTATCGAGAAATACTTCTGAAGTGACTTTCAAGGATCAGGGTCGCCGTACACCCGAAATTTTGAACATAAGTGATACTGTTGATGCTAAATCACCTGGAATCACTATTGACGTTTCAAAACCAAAACCTTCTCCAATAGATACTGATGGTATGAATGTTGAGCCACAGGCTGTGCATGGTTTTGATCCATCTCCAAACACCAAAGTTTCGTTTCTGTCTCCATTTTCGCCAACTTCGCCATTT…	ATGTCAACCGATATTGAAAATACACTGCAGCAAAGTCAACTGCCACAACAACCACAGCAGCAACAGCAACAACAACAGCAACAACAACCACAACAGCCAATGTCGTCCTTGACAAAGTTGCTACATGAATCGACCTCAACCCTAGCTTCTCCAGTGTTATCGAGAAATACTTCTGAAGTGACTTTCAAGGATCAGGGTCGCCGTACACCCGAAATTTTGAACATAAGTGATACTGTTGATGCTAAATCACCTGGAATCACTATTGACGTTTCAAAACCAAAACCTTCTCCAATAGATACTGATGGTATGAATGTTGAGCCACAGGCTGTGCATGGTTTTGATCCATCTCCAAACACCAAAGTTTCGTTTCTGTCTCCATTTTCGCCAACTTCGCCATTT…	MSTDIENTSQQSQSPQQPQQQQQQQQQQQPQQPMSSLTKLLHESTSTLASPVLSRNTSEVTFKDQGRRTPEILNISDTVDAKSPGITIDVSKPKPSPIDTDGMNVEPQAVHGFDPSPNTKVSFSSPFSPTSPFTRQSSNSFSSNQAFQNTRGAVASPRYIKNNSVSHSSVFMGGESLSSSIPYSAPGGGRGNPASHSGNTGSLQRENSFSSLNTSDSNSSAHIPNLPNGQPINSIHIQSPQVSASSIDSRFVVSKQRIAQAQAQASLSSSQRSNSQSGLSFFFSQKSKPAVKRDSTTDLGAFYNNSYQDRDAPIVSGSPNSLSSAESTVSYGSSAPTRHNSMANLKRFFKKSTPTTSQPVGTSNLSSSLRSASSGASGAMNIPNSLNGQTNNGYQSPSS…	NPR1, Predicted serine/threonine protein kinase, involved in regulation of ammonium transport; induced in core stress response; Hap43p-repressed gene	90470.6	8.74	60.06	Unstable
C1_07380C_ST10	C1_07380C_A	chr1A	1595184	1598036	ATGGAACAATTTGAACGATATGACAAGGGCGAACTATTGCGAGATCGATATCTAAAAGTTAATGATATAAGTGAAGGTTCTTACGGTTTAGTGTCAGTCGCCAAAGATACGCGTAACAATGACTGTTTGGTTGCTGTTAAGTTTATCTATCCAGTTGATTACAAAAAGGACCATCAACTTCTTGAAACTACATCAAGACCATCCTCAAGTCCTGCGAAAATGAGAAATAACGGGAACAACAAAAATGAATCTGATAGTCATGATCTGCAACAAAAATCCAATGTCAGTAAACCAACAAGAGAATCTATTTTCAATACCTTGTATAATGAGGCACAAAAGGAAATCAAGTTCCACAAAATTCTTGGTGATCATCCTCATATTTCTAAATTGTATGATCAT…	ATGGAACAATTTGAACGATATGACAAGGGCGAACTATTGCGAGATCGATATCTAAAAGTTAATGATATAAGTGAAGGTTCTTACGGTTTAGTGTCAGTCGCCAAAGATACGCGTAACAATGACTGTTTGGTTGCTGTTAAGTTTATCTATCCAGTTGATTACAAAAAGGACCATCAACTTCTTGAAACTACATCAAGACCATCCTCAAGTCCTGCGAAAATGAGAAATAACGGGAACAACAAAAATGAATCTGATAGTCATGATCTGCAACAAAAATCCAATGTCAGTAAACCAACAAGAGAATCTATTTTCAATACCTTGTATAATGAGGCACAAAAGGAAATCAAGTTCCACAAAATTCTTGGTGATCATCCTCATATTTCTAAATTGTATGATCAT…	MEQFERYDKGELLRDRYLKVNDISEGSYGLVSVAKDTRNNDCLVAVKFIYPVDYKKDHQLLETTSRPSSSPAKMRNNGNNKNESDSHDSQQKSNVSKPTRESIFNTLYNEAQKEIKFHKILGDHPHISKLYDHFDTCLILEFCSRGDLYEAIHSGNGPVTTPDIKDVFQQILTAVEYCHSRGVYHRDLKPENILIAEDWSIKICDWGLATTSKIVTNKDEFDIGSERYMAPELFDNNLESYDASKIDIWSVGVILLTLVFHKNPFQVANYSDKRFIQFVNNREALFDIFSTMSGDLFSVLRFSLTIDPDNRDLKGFLDELMSLRYFTIDEEYWASEYDDDGDLEEERVGGEGEENEGYYDDDDDDDHDEEEDSEEFGFFDDYEDKLSVSPQKLVEIKAT…	KSP1, Putative serine/threonine protein kinase; mRNA binds She3 and is localized to hyphal tips; mutation confers hypersensitivity to amphotericin B	107312	6.06	40.44	Unstable
C1_07640C_ST11	C1_07640C_A	chr1A	1651145	1653661	ATGAGTATTTCATCAACTGCTAGTACATCAACTACTACTTTTTATCCTACCAGTAATAGGACTTCAATAGATACTACTGCTACTTCAATCAATAATGATTATGTCAACACTAATAAGCCTACTAGACTATCGACGACTTCAAGTTTATTTACTATAGATTCCGAATTAAATGATTTATATCCAGAATTACCATCAAATTTTAAACTTATTGAATTACTTGGTGAAGGAGCATTTTCATCAGTTTATAAAGCTATTGATATCTCGAAGAATAATATGATTGTTGCGATCAAAATCATTAATAAAATTAATCTTAATCTGAAACAATTACAAAATATTATTAATGAAATCAATATATTAAAACAAATTAATTATCATCATCATCCTAATATTATTGAATTA…	ATGAGTATTTCATCAACTGCTAGTACATCAACTACTACTTTTTATCCTACCAGTAATAGGACTTCAATAGATACTACTGCTACTTCAATCAATAATGATTATGTCAACACTAATAAGCCTACTAGACTATCGACGACTTCAAGTTTATTTACTATAGATTCCGAATTAAATGATTTATATCCAGAATTACCATCAAATTTTAAACTTATTGAATTACTTGGTGAAGGAGCATTTTCATCAGTTTATAAAGCTATTGATATCTCGAAGAATAATATGATTGTTGCGATCAAAATCATTAATAAAATTAATCTTAATCTGAAACAATTACAAAATATTATTAATGAAATCAATATATTAAAACAAATTAATTATCATCATCATCCTAATATTATTGAATTA…	MSISSTASTSTTTFYPTSNRTSIDTTATSINNDYVNTNKPTRLSTTSSLFTIDSELNDLYPELPSNFKLIELLGEGAFSSVYKAIDISKNNMIVAIKIINKINLNSKQLQNIINEINILKQINYHHHPNIIELLGVIDGINQTFLILEYCDGGEIFDQILKYTYLSEPLSYHVFKQILNALQYLHNTLNIVHRDLKPENLLFNKIPFFKRGINDNNLEKYLRKSDDINEKIDEGEFKYGIGGGTIGVIKLADFGLAKQLNDKNIAQTPCGTTGYTAPEVFQCRNNNNNNNNNNNNNNSNNSNKSSGGSGSGSGSIYHQLFKSSKSKVKTKSKQLSITNYSKSVDIWSLGCVLYTLLCGFPPFYNDDIEILTNNVINGKFEFLKPWWDEISNDAKDLVSK…	orf19.2781, Protein with predicted serine/threonine kinase and tyrosine kinase domains; possibly an essential gene, disruptants not obtained by UAU1 method; Spider biofilm induced	94659.8	4.89	44.99	Unstable
C1_07970C_ST12	C1_07970C_A	chr1A	1731592	1735263	ATGCATTTATTCTATTTCATTTCATATATAATATCAATACTTCTAGTGTCGATTATTGCTTCGCCCCGACTAGAGCGGATCACCACCAAATATTTATCACCTCAGCAACAGCAACAACAACAACGACGGGATCAAGCATATAATCCTGCTACACCTACTAACAATATATATACATCTGCATCACTACAACCTCTAGCTGAACGATCGTTAGACGATTGGGATTTAAATAATATAATATTACTCAGTGATATTAATGGCTCATTACATTGTGTTAATCGTGATGATGGTAATTTAATTTGGTCGCTACCTATAGATGAACCGCTCGTCAAAATTCAATCCAACATCAAAGACAAATCAGCAGCACATAATATTCTTTGGTTTGTTGAACCATATCAGGAT…	ATGCATTTATTCTATTTCATTTCATATATAATATCAATACTTCTAGTGTCGATTATTGCTTCGCCCCGACTAGAGCGGATCACCACCAAATATTTATCACCTCAGCAACAGCAACAACAACAACGACGGGATCAAGCATATAATCCTGCTACACCTACTAACAATATATATACATCTGCATCACTACAACCTCTAGCTGAACGATCGTTAGACGATTGGGATTTAAATAATATAATATTACTCAGTGATATTAATGGCTCATTACATTGTGTTAATCGTGATGATGGTAATTTAATTTGGTCGCTACCTATAGATGAACCGCTCGTCAAAATTCAATCCAACATCAAAGACAAATCAGCAGCACATAATATTCTTTGGTTTGTTGAACCATATCAGGAT…	MHLFYFISYIISILLVSIIASPRLERITTKYLSPQQQQQQQQRRDQAYNPATPTNNIYTSASLQPLAERSLDDWDLNNIILLSDINGSLHCVNRDDGNLIWSLPIDEPLVKIQSNIKDKSAAHNILWFVEPYQDGTLYYFTPKFGLNKLPTSIKDLVMESPFTLSGDDKIYTGTRKTSLYNINIHTGEIKSSFGNTDECPIPRSTLPPETAFNADDTIMIGKTTYELSIHSKSNSDVMWNVTYSQWVPNNIDNDLILQNQQSLDKIYFTPFHDRSLLAINKDIGTPIWISKLPGLPVSIFDVFSNSAKTNDYLLLPHPLKVLNDLQSNDINHQSMVFVNKTSSTSSNSQDHLNDQWVAMSFRNYPTLIKSAPISKYQEVLNKYYAGINTNTNNKNDKEF…	IRE1, Putative protein kinase; role in cell wall regulation; mutant is hypersensitive to caspofungin; Spider biofilm induced	139503	5.56	51.64	Unstable
C1_08540C_AGC02	C1_08540C_A	chr1A	1868417	1870555	ATGTTCAAGTTTAAAAACAAATTGAAATTTGGTACTTCATCATCTGAGAAGCAGCAAACCCCTACTACAACAACAGACACATCAACACCCTCACCTGCACCTGCGTCACCCTCAACATCAACATCAACACAACACAGTAGCACCTCAGTAAAAGACAGTCCCACTCCAAGACAATCAACTGATTCGAGAAATACAATATCTGTCAACAATTTAGCTGACGATGTTTCCAAATTGACGGTTGCTGCGGATAGATCGCCAGAAAAAAGCTTGGGCTCCAATAATAAAGCCGGTGGCGAACCACCTTTATCCACAACAGCTACAGACACCACCTCTAACTCCTCCTATAGGGCTTCACCATCATCATCACAAGCAACTTCATTATTGGGACAAGCTTCCACT…	ATGTTCAAGTTTAAAAACAAATTGAAATTTGGTACTTCATCATCTGAGAAGCAGCAAACCCCTACTACAACAACAGACACATCAACACCCTCACCTGCACCTGCGTCACCCTCAACATCAACATCAACACAACACAGTAGCACCTCAGTAAAAGACAGTCCCACTCCAAGACAATCAACTGATTCGAGAAATACAATATCTGTCAACAATTTAGCTGACGATGTTTCCAAATTGACGGTTGCTGCGGATAGATCGCCAGAAAAAAGCTTGGGCTCCAATAATAAAGCCGGTGGCGAACCACCTTTATCCACAACAGCTACAGACACCACCTCTAACTCCTCCTATAGGGCTTCACCATCATCATCACAAGCAACTTCATTATTGGGACAAGCTTCCACT…	MFKFKNKLKFGTSSSEKQQTPTTTTDTSTPSPAPASPSTSTSTQHSSTSVKDSPTPRQSTDSRNTISVNNLADDVSKLTVAADRSPEKSLGSNNKAGGEPPLSTTATDTTSNSSYRASPSSSQATSLLGQASTGSDQSTQAASPGLLTVKIYGSQNIQLPIKINNTKQILHALAINANNESVGQKLLKNLSALEKENTEIGDYLPGSIATNFLPSIITIPNAENMVKSLLYLTIEFDNNVLVIEPQRGTVNQSTWNQVVSFDVSKKSQQENGHSTMGSNFLNLNLFIRLPNMLIPENEKTSKKHLFTNFQQGQGTGSDGGNNIGDLLIGTIKLPLNLKCHTQQIRLMNHEYLKFSNFNAGLQDLVSNDMGEIMLTIEFKPLTKKRLSIEDFDLLKLLGR…	orf19.399, Putative serine/threonine protein kinase; possibly an essential gene, disruptants not obtained by UAU1 method	79391.9	6.23	41.36	Unstable
C1_10010C_ST13	C1_10010C_A	chr1A	2189027	2192563	ATGGATTCAAACCCGTGTCAAGACGTATCGGGTGATACCAGTAGCACACCAATGGCCAACAATAATCCCACTAATGACAGCACAATCTCCTCTCAGAACCATTCTAAAATTGGCTTGAGAAAACACCAACAACAACACTACCACCAACACCTGCACCTGCAAATGCATTCTCATTCACAGCAGTCACCTTATATTAATCAATTGGAATACTTTACCAATAACCAGTTTTCACGCTCTTTCAATAGTTTAATTTTGGAGGATGCCAATGATGCCAATACCAACAATAGTTCAACAACAACCTTAAATAAGAAAACCATTAACAAGTCACCACCATTCAATATCAAGCAGGACTTATTAAACGATAGTATCGACACGTTTCTTGATAACTCCAACACGGAA…	ATGGATTCAAACCCGTGTCAAGACGTATCGGGTGATACCAGTAGCACACCAATGGCCAACAATAATCCCACTAATGACAGCACAATCTCCTCTCAGAACCATTCTAAAATTGGCTTGAGAAAACACCAACAACAACACTACCACCAACACCTGCACCTGCAAATGCATTCTCATTCACAGCAGTCACCTTATATTAATCAATTGGAATACTTTACCAATAACCAGTTTTCACGCTCTTTCAATAGTTTAATTTTGGAGGATGCCAATGATGCCAATACCAACAATAGTTCAACAACAACCTTAAATAAGAAAACCATTAACAAGTCACCACCATTCAATATCAAGCAGGACTTATTAAACGATAGTATCGACACGTTTCTTGATAACTCCAACACGGAA…	MDSNPCQDVSGDTSSTPMANNNPTNDSTISSQNHSKIGLRKHQQQHYHQHSHSQMHSHSQQSPYINQLEYFTNNQFSRSFNSLILEDANDANTNNSSTTTLNKKTINKSPPFNIKQDLLNDSIDTFLDNSNTETIEDGDVTTTDDDHDFDDEDIEDPEAVQYTPTLNILKSKKVDSFDIISSKHRKSNSQITYNSHVRKPSEEDTSSSMATIRLSNNSQSSIKRSSKYLNLSIDSNLKTVDGGKIPDEIDDISLNEIDVAVAPNDFSSPLSARKPDIFAAITAANGNSNNQFKRPHKLVSQSPSPSSKNKFRISSSTTSSPQSNLHSPSKLGSKGFKMFKNANRDAIMSSSRVMTPEKPKMVSKIFGKSAKIRRAYTPTHTSTPMAVSSLNPPSSSTSN…	SWE1, Putative protein kinase with a role in control of growth and morphogenesis, required for full virulence; mutant cells are small, rounded, and sometimes binucleate; not required for filamentous growth; mutant is hypersensitive to caspofungin	130728	5.93	52.47	Unstable
C1_10210C_ST14	C1_10210C_A	chr1A	2249405	2252335	ATGACAAGTATTTATACATCAGATTTGAAAAACCATAGACGTGCGCCACCTCCACCAAATGGGGCAGCTGGCTCTGGCTCAGGTTCTAGTTCTGGTTCTGGCTCAGGTTCTGGTTCTGGTTCGGGTTCTGGCAGTTTGACTAATATTGTTACCAGTTCTAATAGTCTTGGCGTAACAGCAAATCAAACCAAACCCATTCAATTAAATATAAATTCTAGCAAACGTCAATCAGGTTGGGTTCATGTTAAAGATGATGGTATTTTCACATCATTTAGATGGAACAAAAGGTTTATGGTCATTAATGATAAAACTTTAAACTTTTATAAACAAGAACCATATTCTAGTGATGGTAATTCCAATTCTAATACCCCTGATTTATCATTCCCACTATATTTAATT…	ATGACAAGTATTTATACATCAGATTTGAAAAACCATAGACGTGCGCCACCTCCACCAAATGGGGCAGCTGGCTCTGGCTCAGGTTCTAGTTCTGGTTCTGGCTCAGGTTCTGGTTCTGGTTCGGGTTCTGGCAGTTTGACTAATATTGTTACCAGTTCTAATAGTCTTGGCGTAACAGCAAATCAAACCAAACCCATTCAATTAAATATAAATTCTAGCAAACGTCAATCAGGTTGGGTTCATGTTAAAGATGATGGTATTTTCACATCATTTAGATGGAACAAAAGGTTTATGGTCATTAATGATAAAACTTTAAACTTTTATAAACAAGAACCATATTCTAGTGATGGTAATTCCAATTCTAATACCCCTGATTTATCATTCCCACTATATTTAATT…	MTSIYTSDLKNHRRAPPPPNGAAGSGSGSSSGSGSGSGSGSGSGSLTNIVTSSNSLGVTANQTKPIQLNINSSKRQSGWVHVKDDGIFTSFRWNKRFMVINDKTLNFYKQEPYSSDGNSNSNTPDLSFPLYLINNINLKPNSGYSKTSQSFEIVPKNNNKSILISVKTNNDYLDWLDAFTTKCPLVQIGENNSGVSSSHPHLQIQHLTNGSLNGNSSSSPTSGLSSSSVLTGGNSGVSGPINFTHKVHVGFDPASGNFTGLPDTWKSLLQHSKITNEDWKKDPVAVIKVLEFYSDINGGNSAAGTPIGSPMINSKTNNNNNDPNNYSSAKNNVQEANLQEWVKPPAKSTVSQFKPSRAAPKPPTPYHLTQLNGSSHQHTSSSGSLPSSGNNNNNNNSTN…	CLA4, Ste20p family Ser/Thr kinase required for wild-type filamentous growth, organ colonization and virulence in mouse systemic infection; role in chlamydospore formation; functional homolog of S. cerevisiae Cla4p; mutant caspofungin sensitive	107210	9.41	43.05	Unstable
C1_10220C_AGC03	C1_10220C_A	chr1A	2255500	2256717	ATGACATCCATGGAACCAGCAGACACAAGCATCAGGTCATTAAACGACATCAACTTACAAGAACTTGCCAACAAACAACATCAACGAAATATATATGCTCAAGGATCACCTACACTAGAAGATTCAATAACATCAAATGGTAATGATATTAATAATCCCAACAATAATATAAATAAAACCAATAATAACAGTAATTCAAGTCTTTCCTTGACCAAGAAAACATCAAGACATATCAATAAAGACACTACAACTAAAGGCAAATATACATTAAATGATTTTCAAATATTACGAACATTAGGAACAGGTTCCTTTGGTAGAGTTCATTTAACTCGATCGATTCATAATGGTAGATTTTATGCTATGAAAGTATTAAAGAAACAACGAGTAGTACAAATGAAA…	ATGACATCCATGGAACCAGCAGACACAAGCATCAGGTCATTAAACGACATCAACTTACAAGAACTTGCCAACAAACAACATCAACGAAATATATATGCTCAAGGATCACCTACACTAGAAGATTCAATAACATCAAATGGTAATGATATTAATAATCCCAACAATAATATAAATAAAACCAATAATAACAGTAATTCAAGTCTTTCCTTGACCAAGAAAACATCAAGACATATCAATAAAGACACTACAACTAAAGGCAAATATACATTAAATGATTTTCAAATATTACGAACATTAGGAACAGGTTCCTTTGGTAGAGTTCATTTAACTCGATCGATTCATAATGGTAGATTTTATGCTATGAAAGTATTAAAGAAACAACGAGTAGTACAAATGAAA…	MTSMEPADTSIRSLNDINLQELANKQHQRNIYAQGSPTLEDSITSNGNDINNPNNNINKTNNNSNSSLSLTKKTSRHINKDTTTKGKYTLNDFQILRTLGTGSFGRVHLTRSIHNGRFYAMKVLKKQRVVQMKQIEHTNDERRMLKLAQHPFIIRMWGTFQDCHNLFMIMDYIEGGELFSLLRKSQRFPTPVAKFYAAEVFLAIEYLHSLDIIYRDLKPENILLDKNGHIKLTDFGFAKEVQDVTYTLCGTPDYIAPEVVATKPYNKSVDWWSFGILIFEMLTGYTPFYDPTPMKTYENILNGSITYPDYLPPDILDLLQKLIVKDLTQRLGNLQGGSDDVKNHPWFKEVIWERLLSRDIETPYEPPITSGVGDTSQFDRYPEDKDLDYGISGVEDPYR…	TPK1, cAMP-dependent protein kinase catalytic subunit; Tpk2 isoform; control of morphogenesis and stress response; WT nuclear localization requires Bcy1; produced during stationary, not exponential growth; rat catheter and Spider biofilm induced	46720.2	5.84	42.17	Unstable
C1_10380C_AGC04	C1_10380C_A	chr1A	2296797	2298995	ATGAATTTCGATCAGCTTACAGACGAGCAGAAGCAACAGCTTTATTTGCAACATTTGCAACAACAACAGCAGTTACAGCAACAGCAACAGCAGCTACAACAACAGCAGCACCAGTTACAACAGCAACAGCAAAGTTATCATCTACAGCAACAACAAGCAGCATATCAACAACAAAACCAAGCACAGTTACAACAAGATGATAGTTACATGGATGAAGATACGTCGGAACTCATTAATCAACCACCAGTTCAATTAGATCATGGATCTCCTATTAGACAACAGCCGCAAATGTCGGCATTCATGCCATCACCTCGATTTGCTCAGCTGGAAAGTTTTGATAATCATCTTAATGTTGACCCTAACAATACTGAACGATTCACATCGATGGATTCTATGAAT…	ATGAATTTCGATCAGCTTACAGACGAGCAGAAGCAACAGCTTTATTTGCAACATTTGCAACAACAACAGCAGTTACAGCAACAGCAACAGCAGCTACAACAACAGCAGCACCAGTTACAACAGCAACAGCAAAGTTATCATCTACAGCAACAACAAGCAGCATATCAACAACAAAACCAAGCACAGTTACAACAAGATGATAGTTACATGGATGAAGATACGTCGGAACTCATTAATCAACCACCAGTTCAATTAGATCATGGATCTCCTATTAGACAACAGCCGCAAATGTCGGCATTCATGCCATCACCTCGATTTGCTCAGCTGGAAAGTTTTGATAATCATCTTAATGTTGACCCTAACAATACTGAACGATTCACATCGATGGATTCTATGAAT…	MNFDQLTDEQKQQLYLQHLQQQQQLQQQQQQLQQQQHQLQQQQQSYHLQQQQAAYQQQNQAQLQQDDSYMDEDTSELINQPPVQLDHGSPIRQQPQMSAFMPSPRFAQSESFDNHLNVDPNNTERFTSMDSMNFQPPASTFTQLGNGSSTNLSEISSGQNSLLSNHSVNNLPTALTSDTSPPVQQHPQFQPQQQQQQQQPQQQQIFQQQQQQQQQQQQPQQSRAVVNQSVSTEAANSDMTGSNTKYVYFERKPNLLSKTTQDKAASIKLTLENYYTSSVSHAIERNQRRLELENKIANEDIGSSEERKNRQLQNLGKKESQFLRLKRTKLALEDFHTVKVIGKGAFGEVRLVQKKDTGKIYAMKTLLKSEMFNKDQLAHVKAERDVLAGSDSPWIVALY…	CBK1, Ser/Thr kinase of cell wall integrity pathway; mutants show abnormal morphology and aggregation; Mob2p associated; required for wild-type hyphal growth and transcriptional regulation of cell-wall-associated genes	84497.2	5.96	61.54	Unstable
C1_11400C_ST15	C1_11400C_A	chr1A	2497783	2501832	ATGCCACATTCAAGACAACCTTCGATATCGTCATCGATTATGTCCCAATCAAATCATAATCATCCACAGAAGATCGGACCTTGGAAATTAGGTAAAACTTTAGGAAGAGGTGCCACCGGTAGAGTCTTATTAGCTACTCATCAAACTACTGGTCAAAAAGCTGCCGTTAAAGTAGTTTCCAAATCCGAATTACAAGACGAAGAAACCGAGAAAAATGGAGATGGATTACCATATGGTATAGAAAGAGAAATTATTATAATGAAATTATTAACTCATCCTAATGTTTTGAGATTATATGATGTATGGGAAACATCTAAGGCTCTTTATCTTGTTCTAGAATACGTTGAAGGTGGAGAATTATTTGATTTATTGGTGGAACGTGGTCCATTACCTGAAGTC…	ATGCCACATTCAAGACAACCTTCGATATCGTCATCGATTATGTCCCAATCAAATCATAATCATCCACAGAAGATCGGACCTTGGAAATTAGGTAAAACTTTAGGAAGAGGTGCCACCGGTAGAGTCTTATTAGCTACTCATCAAACTACTGGTCAAAAAGCTGCCGTTAAAGTAGTTTCCAAATCCGAATTACAAGACGAAGAAACCGAGAAAAATGGAGATGGATTACCATATGGTATAGAAAGAGAAATTATTATAATGAAATTATTAACTCATCCTAATGTTTTGAGATTATATGATGTATGGGAAACATCTAAGGCTCTTTATCTTGTTCTAGAATACGTTGAAGGTGGAGAATTATTTGATTTATTGGTGGAACGTGGTCCATTACCTGAAGTC…	MPHSRQPSISSSIMSQSNHNHPQKIGPWKLGKTLGRGATGRVLLATHQTTGQKAAVKVVSKSELQDEETEKNGDGLPYGIEREIIIMKLLTHPNVLRLYDVWETSKALYLVLEYVEGGELFDLLVERGPLPEVEAIKYFRQIILGTAYCHALGICHRDLKPENLLLDSQLNVKLADFGMAALESNGKLLETSCGSPHYAAPEIVSGLKYHGAASDVWSCGVILFALLTGRLPFDDENIRNLLLKVQAGNFEMPVDEVSREARDLIARMLEVDPMRRISTEKILRHPLLTKYPMSNEDLISEKSLPHPQTGYKSLGSVRNIDKQILSNLTILWNDRPEEEIVDCLLKDGSNPEKTFYALLMRYKHNQEDNTNNNSPKKSTSFNNKVVRSGSKYSLNGTPR…	GIN4, Autophosphorylated kinase; role in pseudohyphal-hyphal switch and cytokinesis; phosphorylates Cdc11p on S395; necessary for septin ring within germ tube but not for septin band at mother cell junction; physically associates with septins	152945	9.35	57.44	Unstable
C1_12120W_ST16	C1_12120W_A	chr1A	2648544	2650742	ATGAATCATGACAACATAGCACTATTTGAAAGTGAATTTTCACAAATACACCTTAATCATCGTAACAATCTTGACAAAAAAATCTCACCAACTCGAAGGAAAAAAGTGTTATATCCACCACATCTATACCCGGCGAGACTTGACGCTGGTAGACAAATATCAAAAGAGTTATCACCTGCTTCCGTGGCTAATTTGAATTCAAACAAATATGACATGTCGAGGACTCCAGTTACGCCAAAGAGAACAACAAGTGCAACTAATAGCGACACTCAAAACAAACTAACCAACTTGCAGAGCTCCAAAAATCCATTCCGGTCAGACAGAACAGTGAGTTATCCAGTTCCAGATAAAATATCTAAAAAATCAGATGGCCAGTTTTCATTTATGAGAGAGACATCA…	ATGAATCATGACAACATAGCACTATTTGAAAGTGAATTTTCACAAATACACCTTAATCATCGTAACAATCTTGACAAAAAAATCTCACCAACTCGAAGGAAAAAAGTGTTATATCCACCACATCTATACCCGGCGAGACTTGACGCTGGTAGACAAATATCAAAAGAGTTATCACCTGCTTCCGTGGCTAATTTGAATTCAAACAAATATGACATGTCGAGGACTCCAGTTACGCCAAAGAGAACAACAAGTGCAACTAATAGCGACACTCAAAACAAACTAACCAACTTGCAGAGCTCCAAAAATCCATTCCGGTCAGACAGAACAGTGAGTTATCCAGTTCCAGATAAAATATCTAAAAAATCAGATGGCCAGTTTTCATTTATGAGAGAGACATCA…	MNHDNIALFESEFSQIHLNHRNNLDKKISPTRRKKVLYPPHLYPARLDAGRQISKELSPASVANLNSNKYDMSRTPVTPKRTTSATNSDTQNKLTNLQSSKNPFRSDRTVSYPVPDKISKKSDGQFSFMRETSSSLQKKQVLTPVNERRTTSGRSSSVGSSSTKKRLEYSRQLSQRSKRHISNSLINKSNHDFSDFENSHTGKYRSSSESSPEEYYQLNTDDIVIDESPSKPRRRMTQPLPKTDNVFDRLYPKSLKHPTAKSPTTKPNKETQTSKSIPRSKIESISQLHQSLYIKNPQLFRDDTLEEQLQAPHDIQESDLDGLSMYEKGELARKKEIYYISKRPLRQIAVNSQENNFGFDDNKGNYIIIPEDHINYRYEIISVLGTGSFGNVVMANDHK…	YAK1, Has domain(s) with predicted ATP binding, protein kinase activity, protein tyrosine kinase activity and role in protein phosphorylation	84198.3	9.42	52.69	Unstable
C1_12410C_ST17	C1_12410C_A	chr1A	2700195	2703026	ATGCATAAATTTAGATATTCTTTGCACCAACACTATAGCAAACGCAATTCAAGTGACAAATCCAAAGACAGTCCAATTAGCCAAAACAGCAATGAAGAAAATGATTCGACTAAATTAAGTTCAAGTAGTCTTCAAGACTTACATGATGATCTCGATGATATTTATAACAACTATACTTTAGCACAGGGTACCAATAACAACAGTGTAGATACATTGGATTCTGAAAATAATCAAGCTATAAATAAGTTTATTGATAAACCTCCAGCAATTCATGGTATGGAACCACAACTACCGGTGATGCACGTTTCTTCACGATTATCTTCCTTAGGTAATACCACCAATGAAACCGGTGAAAGCATCGCCAAAAGTGCACCAGGAACTCCGTTATCTTCACATTCA…	ATGCATAAATTTAGATATTCTTTGCACCAACACTATAGCAAACGCAATTCAAGTGACAAATCCAAAGACAGTCCAATTAGCCAAAACAGCAATGAAGAAAATGATTCGACTAAATTAAGTTCAAGTAGTCTTCAAGACTTACATGATGATCTCGATGATATTTATAACAACTATACTTTAGCACAGGGTACCAATAACAACAGTGTAGATACATTGGATTCTGAAAATAATCAAGCTATAAATAAGTTTATTGATAAACCTCCAGCAATTCATGGTATGGAACCACAACTACCGGTGATGCACGTTTCTTCACGATTATCTTCCTTAGGTAATACCACCAATGAAACCGGTGAAAGCATCGCCAAAAGTGCACCAGGAACTCCGTTATCTTCACATTCA…	MHKFRYSLHQHYSKRNSSDKSKDSPISQNSNEENDSTKLSSSSLQDLHDDLDDIYNNYTLAQGTNNNSVDTLDSENNQAINKFIDKPPAIHGMEPQLPVMHVSSRLSSLGNTTNETGESIAKSAPGTPLSSHSFDFRPHHPRAVTNSSLNVLLDTPNVSSEFNHLVDQTPPNESVERFDDSNNTVDNTEEEENNDDTDEIPKSETLKQNEENWEKKGAAVKTIKTMDGEMKTIRRNVTDFKFGKELGEGSYSTVILATDKITGKQYAVKVLDKRHIIKEKKVKYVNIEKHALNRLSNRLGVISLYFTFQDKDSLYFVLDYASNGELLTLIKRYNTLNEECTRHFGAQILDAIKYMHDNGVIHRDLKPENILLDDKMRIQITDFGTARLLEKKNDESEEY…	PKH2, Putative serine/threonine protein kinase; predicted role in sphingolipid-mediated signaling pathway that controls endocytosis; mRNA binds She3 and is localized to hyphal tips	106209	7.95	48.98	Unstable
C1_13470W_ST18	C1_13470W_A	chr1A	2952022	2954022	ATGATTAGTAATAGAAAGAGACCAAGAGTTTTAAGTACTGATGGACATTCGAGTGTTTCTAATGACACAGCTACAAATTCTACAAATCTATCAGATACACCTCCTTTTAGTCACCATCACCATCATCATCACAGTCAACAACTGCAACAACAACAACAACAACAAATGCCAATTTTATCTGATACTTCAACTGATTCAAGTAATTCAAGTTTCCCATTTTATAAACCATTACTTAAAAGTAGTAAAATTGAATCAAGTATGTTTACTAATCCATTTTTATCAATTCATGACAGGAATGGGATACAATTGCCTGAATATGGTGATGACGACGATAACGAAGAAGACGAGGAGGATGAAATTAGCGATAATGTCCTTGACAATGATGACGATGATAATTAT…	ATGATTAGTAATAGAAAGAGACCAAGAGTTTTAAGTACTGATGGACATTCGAGTGTTTCTAATGACACAGCTACAAATTCTACAAATCTATCAGATACACCTCCTTTTAGTCACCATCACCATCATCATCACAGTCAACAACTGCAACAACAACAACAACAACAAATGCCAATTTTATCTGATACTTCAACTGATTCAAGTAATTCAAGTTTCCCATTTTATAAACCATTACTTAAAAGTAGTAAAATTGAATCAAGTATGTTTACTAATCCATTTTTATCAATTCATGACAGGAATGGGATACAATTGCCTGAATATGGTGATGACGACGATAACGAAGAAGACGAGGAGGATGAAATTAGCGATAATGTCCTTGACAATGATGACGATGATAATTAT…	MISNRKRPRVLSTDGHSSVSNDTATNSTNLSDTPPFSHHHHHHHSQQSQQQQQQQMPILSDTSTDSSNSSFPFYKPLLKSSKIESSMFTNPFLSIHDRNGIQLPEYGDDDDNEEDEEDEISDNVLDNDDDDNYAIEDDDEEVDEDEIVDIEDDDDDIEEIDGFDNDDDIIFIEQRQLPKRNSDSLLYDTQALEAYNKFRSNKNNNNKKKLPPARIKKQRTNSLPQLPQAKCIYNKLPNYILQGPKLGNIRTNVIPHQLNLPPCVDESGHYIVKPNTLFANRFIIIKLLGQGTFGKVVQCFDKVKNEHVAIKIIRNIQKYRDAAKIELRVLSTLKKFDPDNTNHCIHLRECFDYRGHICIVTDLLKISLYDFLENNKYIGFPGSQIQSIAKQLIRTVCFL…	KNS1, Protein kinase involved in negative regulation of PolIII transcription; effector kinase of the TOR signaling pathway, phosphorylates Rpc53p to regulate ribosome and tRNA biosynthesis; Spider and flow model biofilm induced	77017.5	4.96	49.07	Unstable
C1_14010W_ST19	C1_14010W_A	chr1A	3087546	3088738	ATGGCTACACTCAAAAACAAAAACAATCACCTTAAAGCATGTTCGACATATACCGATAACGAAAATCACTTTTTAGTCGATTCGAGATACGAAATTGTGCGAGTGTTAGGAAAAGGATCATATGGAGTCGTTTGTTCAGCTATTGATACGAAAAGTTCAGTCTCAGCGATGGAGCACAAGATTGCTATAAAGAAAGTAACAAAGATTTTCAACAAAGACATCCTTCTAATCAGGGCAATACGAGAGCTTAAGTTCATGATGTTTTTCAGAGGCCACAAGAATGTATGTACATGAAACTTTAAACTTTGCAACTTTGTTTTGCGTTTCATTTTACTAACATGTGTTGTCAGATTGCAACTTTGCTTGACTTAGATGTTGTATATGTGAAACCTTATGAAG…	ATGGCTACACTCAAAAACAAAAACAATCACCTTAAAGCATGTTCGACATATACCGATAACGAAAATCACTTTTTAGTCGATTCGAGATACGAAATTGTGCGAGTGTTAGGAAAAGGATCATATGGAGTCGTTTGTTCAGCTATTGATACGAAAAGTTCAGTCTCAGCGATGGAGCACAAGATTGCTATAAAGAAAGTAACAAAGATTTTCAACAAAGACATCCTTCTAATCAGGGCAATACGAGAGCTTAAGTTCATGATGTTTTTCAGAGGCCACAAGAATATTGCAACTTTGCTTGACTTAGATGTTGTATATGTGAAACCTTATGAAGGCTTGTATTGTTTTCAAGAGCTAGCCGATTTAGATTTAGCTCGTGTTTTGTACTCAAACGTCCAATTT…	MATLKNKNNHLKACSTYTDNENHFLVDSRYEIVRVLGKGSYGVVCSAIDTKSSVSAMEHKIAIKKVTKIFNKDILLIRAIRELKFMMFFRGHKNIATLLDLDVVYVKPYEGLYCFQELADLDLARVLYSNVQFSEFHIQSFMYQILCGLKYIHSADVIHRDLKPGNILVTTQGTLKICDFGLARGINPVYFRNRSAVITNYVATRWYRAPELIMSTKNYTKAVDIWAVGCILGELFGRRPLFPGKNSHEQIHELFKIIGNPPIETIKKYNWKVEGLLWVKYRPVKWKSLYPFAPLNALELLDSLLQWDYKARLEVEQILEQEFFKNLRNVHEEPSSKAIFDFSFEEKGKSIPQLKEILETEVRVFKEISKTGIE	CSK1, Putative mitogen-activated protein (MAP) kinase with an unknown role; null mutant produces wrinkled colonies; similar to S. cerevisiae Smk1p, which is a protein kinase required for sporulation	43376.1	9.1	34.69	Stable
C2_03320W_HK01	C2_03320W_A	chr2A	683898	691313	ATGTCTATGAACTTTTTTAATTCAAGCGAACCTGCAAGGGACCACAAACCGGACCAGGAAAAGGAAACAGTAATGACGACAGAACATTATGAATTTGAACGACCAGATGTCAAAGCTATACGAAATTTCAAATTCTTCAGGCTGGACGAAACAGAAACCAAAAAAGGACCAAACCTTCATATTTCGGATCTATCCCCTCTTGAATCACAATCTGTGCCCCCTTCAGCCTTAAGTTTAAATCATTCGATAATACCAGACCAATATGAACGACGTCAGGATACACCGGATCCTATACACACTCCTGAAATTTCATTAAGTGATTATTTATATGATCAGACATTGAGTCCCCAAGGTTTTGACAATAGCCGTGAAAATTTCAACATCCACAAAACAATCGCC…	ATGTCTATGAACTTTTTTAATTCAAGCGAACCTGCAAGGGACCACAAACCGGACCAGGAAAAGGAAACAGTAATGACGACAGAACATTATGAATTTGAACGACCAGATGTCAAAGCTATACGAAATTTCAAATTCTTCAGGCTGGACGAAACAGAAACCAAAAAAGGACCAAACCTTCATATTTCGGATCTATCCCCTCTTGAATCACAATCTGTGCCCCCTTCAGCCTTAAGTTTAAATCATTCGATAATACCAGACCAATATGAACGACGTCAGGATACACCGGATCCTATACACACTCCTGAAATTTCATTAAGTGATTATTTATATGATCAGACATTGAGTCCCCAAGGTTTTGACAATAGCCGTGAAAATTTCAACATCCACAAAACAATCGCC…	MSMNFFNSSEPARDHKPDQEKETVMTTEHYEFERPDVKAIRNFKFFRSDETETKKGPNLHISDLSPLESQSVPPSALSLNHSIIPDQYERRQDTPDPIHTPEISLSDYLYDQTLSPQGFDNSRENFNIHKTIASLFEDNSSVVSQESTDDTKTTLSSETCDSFSLNNASYLTNINFVQNHLQYLSQNVLGNRTSNSLPPSSSSQIDFDASNLTPDSIPGYILNKKLGSVHQSTDSVYNAIKIPQNEEYNCCTKASASQNPTNLNSKVIVRLSPNIFQNLSLSRFLNEWYILSGKHSSKEHQIWSNESLTNEYVQDKTIPTFDKESARFRPTLPINIPGILYPQEIINFCVNSHDYPLEHPSQSTDQKRFAMVYQDNDYKTFKELSMFTLHELQTRQGSY…	CHK1, Histidine kinase; 2-component signaling, cell wall synthesis; hyphal growth defect; avirulent in mouse, not rat vaginal infection; phagocytosis rate increased; Spider biofilm induced; required for RPMI biofilm; Bcr1-induced in a/a biofilm	281785	6.09	43.17	Unstable
C2_03330C_MAPK01	C2_03330C_A	chr2A	691444	692577	ATGTCTGCAGATGGAGAATTTACAAGAACCCAGATATTTGGGACTGTTTTTGAAATCACCAATAGATACACTGAGCTAAATCCCGTGGGAATGGGAGCATTTGGTTTGGTGTGCTCAGCCGTTGATAGATTAACTGGTCAAAATGTTGCAGTGAAAAAAGTCATGAAACCTTTTCTGACCTCAGTATTGGCAAAAAGAACCTACAGAGAATTAAAGTTATTGAAACATTTGAAACATGAGAATTTGATTACCTTGGATGATATTTTCATATCTCCTTTGGAGGATATTTACTTTGTCAATGAATTGCAAGGTACTGATTTGCATAGGTTATTGAACTCAAGACCTTTGGAGAAACAATTTATTCAATATTTCACATACCAAATAATGAGAGGTTTAAAA…	ATGTCTGCAGATGGAGAATTTACAAGAACCCAGATATTTGGGACTGTTTTTGAAATCACCAATAGATACACTGAGCTAAATCCCGTGGGAATGGGAGCATTTGGTTTGGTGTGCTCAGCCGTTGATAGATTAACTGGTCAAAATGTTGCAGTGAAAAAAGTCATGAAACCTTTTCTGACCTCAGTATTGGCAAAAAGAACCTACAGAGAATTAAAGTTATTGAAACATTTGAAACATGAGAATTTGATTACCTTGGATGATATTTTCATATCTCCTTTGGAGGATATTTACTTTGTCAATGAATTGCAAGGTACTGATTTGCATAGGTTATTGAACTCAAGACCTTTGGAGAAACAATTTATTCAATATTTCACATACCAAATAATGAGAGGTTTAAAA…	MSADGEFTRTQIFGTVFEITNRYTELNPVGMGAFGLVCSAVDRLTGQNVAVKKVMKPFSTSVLAKRTYRELKLLKHLKHENLITLDDIFISPLEDIYFVNELQGTDLHRLLNSRPLEKQFIQYFTYQIMRGLKYIHSAGVIHRDLKPSNILINENCDLKICDFGLARLQDPQMTGYVSTRYYRAPEIMLTWQKYDTEVDLWSVGCILAEMIEGKPLFPGKDHVHQFSIITELLGSPPADVIDTICSENTLRFVQSLPHRDPIPFSERFASCTHVEPEAIDLLAKLLVFDPKKRISAVEGLTHPYMEAYHDPTDEPVCESKFDWSFNDADLPVDTWRVMMYSEILDFHQTVGVANETEGSEQPDSQVEQNNLDSANGA	HOG1, MAP kinase of osmotic-, heavy metal-, and core stress response; role in regulation of glycerol, D-arabitol in response to stress; phosphorylated in response to H2O2 (Ssk1-dependent) or NaCl; mutant induces protective mouse immune response	42945.3	5.03	35.76	Stable
C2_03760C_ST20	C2_03760C_A	chr2A	792275	795163	ATGGATATTCCCTTGAAATCAAAACCAAAGGTATCTACAGTGAACCTACTTGCAGATTCCAAATTTGAAATAGGGTCAACCACAAATTCATCAGCCCCATTGGATATAGACAACAATGACAAAGATGAACCATCTCAATTGAACCCTAATTATCTAAAAATTCGACACAGTTCAAAGAATCAACAACAAGACCAGCAACAACTAGAAGGATTTCCTCCAAATTATACATTTTCTCGACGATACTCGGAAACAGAGAAGAACAATTTTGACCCTGAAACTGGACATAGAATATTTGCTGATGGTAAAATCCGACCTCATCAAGTTAAGCACGAACACATGGGTTCAAGAAATACATTTACTAATATCAATGATTTTAATAATTCCAGTGAAGTAGGTAGA…	ATGGATATTCCCTTGAAATCAAAACCAAAGGTATCTACAGTGAACCTACTTGCAGATTCCAAATTTGAAATAGGGTCAACCACAAATTCATCAGCCCCATTGGATATAGACAACAATGACAAAGATGAACCATCTCAATTGAACCCTAATTATCTAAAAATTCGACACAGTTCAAAGAATCAACAACAAGACCAGCAACAACTAGAAGGATTTCCTCCAAATTATACATTTTCTCGACGATACTCGGAAACAGAGAAGAACAATTTTGACCCTGAAACTGGACATAGAATATTTGCTGATGGTAAAATCCGACCTCATCAAGTTAAGCACGAACACATGGGTTCAAGAAATACATTTACTAATATCAATGATTTTAATAATTCCAGTGAAGTAGGTAGA…	MDIPLKSKPKVSTVNLLADSKFEIGSTTNSSAPLDIDNNDKDEPSQLNPNYLKIRHSSKNQQQEQQQLEGFPPNYTFSRRYSETEKNNFDPETGHRIFADGKIRPHQVKHEHMGSRNTFTNINDFNNSSEVGRTNGNNHITNNINDSNNNNNNNNFNNNQLHARSHDSNVGYKDETGYEEFIPGLDFSSLVSKWNSNSNSNLDLTRNTTNVSLYTTHSNTPRSRDGSYLDLNLLHSKVAPQPIKTSTDQQRNLSYSKLHEFMKTKQQKNAYNSNNNNDEDNDIVSLTKDNFSRSSSGLGSSPGSVKRETSASSMAETSKARKKQKSAIDPITGEVNYELILNSLPPNFNDMPYSQRKKLVKSFSESIDYSQFSLFAKNYLGSSVGSAKTLKGSSSGTGI…	orf19.846, Predicted protein kinase similar to S. cerevisiae Nnk1; implicated in proteasome function in S. cerevisiae; induced by Mnl1 under weak acid stress	108615	8.08	43.07	Unstable
C2_03770C_ST21	C2_03770C_A	chr2A	795612	798083	ATGACAGAGATTAATGATTCTACAGAAAACATAACCCGAATAGATCGAAATGATGCAAAGGAATTAAAACATTGGTTAGCCAAGGCAAATTGCCAACACCACTATTCCAAGTTTATTGAAAATGGAATTACTATGGATTTACTACCGGAATTAGACACAGGTTCATTAAAGGAATTGGGTATTTCAAAATTAGGAGACCGGTTAAGATTAGAAATTGCTATATCCAATTTGAAGGCTGAAAATTTGAAGGAACTAATAAGTGTTGACGAAATATATCAATTGTTAAATTTAAATCCTCAACCAAGTGGATCTTTGACAAACTTGAATAACAATAATAATAGCTTGTTAGATGTATCCAACAGTAACGAAGGAACATTAACCCAACTAAGTCAAAATAAC…	ATGACAGAGATTAATGATTCTACAGAAAACATAACCCGAATAGATCGAAATGATGCAAAGGAATTAAAACATTGGTTAGCCAAGGCAAATTGCCAACACCACTATTCCAAGTTTATTGAAAATGGAATTACTATGGATTTACTACCGGAATTAGACACAGGTTCATTAAAGGAATTGGGTATTTCAAAATTAGGAGACCGGTTAAGATTAGAAATTGCTATATCCAATTTGAAGGCTGAAAATTTGAAGGAACTAATAAGTGTTGACGAAATATATCAATTGTTAAATTTAAATCCTCAACCAAGTGGATCTTTGACAAACTTGAATAACAATAATAATAGCTTGTTAGATGTATCCAACAGTAACGAAGGAACATTAACCCAACTAAGTCAAAATAAC…	MTEINDSTENITRIDRNDAKELKHWLAKANCQHHYSKFIENGITMDLLPELDTGSLKELGISKLGDRLRLEIAISNLKAENLKELISVDEIYQLLNLNPQPSGSLTNLNNNNNSLLDVSNSNEGTLTQLSQNNSSNNLPISSMNSSTNNINGNTINSSSGNVVGNSASSKDSSKTITFILQDGSTKRVNATGCFNAQAIKRRVLKKLGFKPDEIQFDTYVHSVPHGVENVLYGKTEPTITLLYDVELVTICYSPERLEKYRIMLVPKNEPPTPAAIETSKKIMSKYKKQVSGSKAELQEEVNQLHTKDVQAHRSTLRNFFGQRPPSELISSNLAEYFPDTRQKDLEQTVRNSVRHSVRLSRRFNLPAGAFSSSVYSLNKRQSILSNSTGFPSNRTMSIS…	STE11, Protein similar to S. cerevisiae Ste11p; mutants are sensitive to growth on H2O2 medium	91343.9	5.76	43.54	Unstable
C2_03940C_AGC05	C2_03940C_A	chr2A	825401	827764	ATGGTAGATTTTGCAAAATCATTATTTGGTTTTGGTAATTATAAAAAGGAATCATCATCACAATCTCCCACTCCGCCACCAAGTGCTCATTCATCACAAGAACAACACCACAAGTCAAACACAGAAGAATATCCTCAATCTCATTTATCTCAACAACAACATTCTCATCGTTATCAACCGCCGCACATGTCTGAACAATCACACCAATTTCCACAACAACAACAACAACAACAACAGTCAGGCACAAACAAATTCTTTCCGAAAACACTAGTGAGTGCAGCACCAACCACGGCAGTTGCCAACCATTCATCGGTTTACGGAACAACAAGCACAACAACCAACAATTACCCTGAAGCATATTTGAACCAGACATTCAAGAATAATATTTACAACCCACAG…	ATGGTAGATTTTGCAAAATCATTATTTGGTTTTGGTAATTATAAAAAGGAATCATCATCACAATCTCCCACTCCGCCACCAAGTGCTCATTCATCACAAGAACAACACCACAAGTCAAACACAGAAGAATATCCTCAATCTCATTTATCTCAACAACAACATTCTCATCGTTATCAACCGCCGCACATGTCTGAACAATCACACCAATTTCCACAACAACAACAACAACAACAACAGTCAGGCACAAACAAATTCTTTCCGAAAACACTAGTGAGTGCAGCACCAACCACGGCAGTTGCCAACCATTCATCGGTTTACGGAACAACAAGCACAACAACCAACAATTACCCTGAAGCATATTTGAACCAGACATTCAAGAATAATATTTACAACCCACAG…	MVDFAKSLFGFGNYKKESSSQSPTPPPSAHSSQEQHHKSNTEEYPQSHLSQQQHSHRYQPPHMSEQSHQFPQQQQQQQQSGTNKFFPKTLVSAAPTTAVANHSSVYGTTSTTTNNYPEAYLNQTFKNNIYNPQQQQQQQAQQPPPEQQQSSAPYQNSANIQQPYGNQWGSSQDQDANIITIDKTGNKLSPASRDSPIKGKLKVTILEAKDIFATQPYVVCSFESSEFVTNAPDSYGKSPVSSFGHNNNQGHNGPRNMYNSNHGPSPKALPMKNSGNLFGQRPSMYQRQLSTPHLNLPNDSSNPIWNHDTIFDVVGSKSELDISVYDGARDDAFLGHVRISPSTDKNNKNESEWLQLGARITGETVSSGHIKIKWEYTSFDNNIKRSYGPDDFHFLRLLG…	SCH9, Protein kinase; involved in growth control, cell size, resistance to rapamycin, cations, chlamydospore formation, filamentous growth under some conditions, and virulence; prevents hyphal growth in hypoxia at high CO2; Spider biofilm induced	88742.9	5.78	51.79	Unstable
C2_04260W_ST22	C2_04260W_A	chr2A	893030	894856	ATGAGTTATAGTTCAGCTTCATTTAGAAAACTTAATAATGTTGGGATATCTCAACCATCACAAACAACAACAACAACAACCTCGGCGAATCAACCTCAACTGCAACTGCAACAACAGCCTTTACAACAACTGCAACAACAGCATTTACATATGAAACCAAATCCTCATATTCCACATCATCAATTACCAGGAACTGTTGGCACTAGAACTTCGATCCCTCAACCAGCATTAATGGCACTGAATTCAATTTTGACTTTGGGTCCATTTAAACATCGTAAAGATTTGACACGAGAGTCAGTTTTATCAACCTATCAAATTATGGGATATATTGCTGCTGGTACTTATGGGAAAGTCTATAAGGCTAAATTGAAAAGTAATAAACTTAATAAAACTGACGAT…	ATGAGTTATAGTTCAGCTTCATTTAGAAAACTTAATAATGTTGGGATATCTCAACCATCACAAACAACAACAACAACAACCTCGGCGAATCAACCTCAACTGCAACTGCAACAACAGCCTTTACAACAACTGCAACAACAGCATTTACATATGAAACCAAATCCTCATATTCCACATCATCAATTACCAGGAACTGTTGGCACTAGAACTTCGATCCCTCAACCAGCATTAATGGCACTGAATTCAATTTTGACTTTGGGTCCATTTAAACATCGTAAAGATTTGACACGAGAGTCAGTTTTATCAACCTATCAAATTATGGGATATATTGCTGCTGGTACTTATGGGAAAGTCTATAAGGCTAAATTGAAAAGTAATAAACTTAATAAAACTGACGAT…	MSYSSASFRKLNNVGISQPSQTTTTTTSANQPQSQSQQQPLQQSQQQHLHMKPNPHIPHHQLPGTVGTRTSIPQPALMASNSILTLGPFKHRKDLTRESVLSTYQIMGYIAAGTYGKVYKAKLKSNKLNKTDDDSGIDGINNKDIFSESMNDLHHDNSSSIMINTTTNITINNSLPQFFAIKKFKSDNHHHHINNNNNGGNHLSKGNNSIHQDEVLHYTGISQSAIREMSLCRELNNKNITKLVDIILENKSIYMVFEFCEHDLLQIIHYQSHPDFKPIPCPTIKSLIWQILNGVTFLHKNWILHRDLKPANIMVSSQGVVKIGDLGLARKFKSPLQSLYTGDKVVVTIWYRAPELLLGTRHYTPAVDLWAVGCILAELLSLRPIFKGEEAKIDLNNKK…	SSN3, Putative cyclin-dependent protein kinase; mutants are sensitive to growth on H2O2 medium	68960.2	9.17	42.36	Unstable
C2_04270W_ST23	C2_04270W_A	chr2A	895055	896074	ATGAAGTTGTCAGATTATTATATAGACAAGGAATTAATTTACAATAGTGCCATTTCTGATATATATACGGCTATTGATAAGTTTAATAACTTACCAGTATGTCTTAAAATAGTTGATGAAGATTTCAGTCTTCCACCACATTCAATCCATCGAGAAGTTCTTATACTTAAAACTTTGAAACCACATCCAAACATAATTGAATATTTTAATGATCTTAAAATTTGTGACGATATTATATTAGTCACCAAATTGTATCGTTATGATTTGAGTCAATTGATTGAAATTACAAAATATTGTAAACGAACAACACGATTTATTTATGGTATTAATGGTAATCTTGTTAGTAATCAATATACACTTGCTAATGAAATTGAAGAAAAAGATATCAAATTATGGTTA…	ATGAAGTTGTCAGATTATTATATAGACAAGGAATTAATTTACAATAGTGCCATTTCTGATATATATACGGCTATTGATAAGTTTAATAACTTACCAGTATGTCTTAAAATAGTTGATGAAGATTTCAGTCTTCCACCACATTCAATCCATCGAGAAGTTCTTATACTTAAAACTTTGAAACCACATCCAAACATAATTGAATATTTTAATGATCTTAAAATTTGTGACGATATTATATTAGTCACCAAATTGTATCGTTATGATTTGAGTCAATTGATTGAAATTACAAAATATTGTAAACGAACAACACGATTTATTTATGGTATTAATGGTAATCTTGTTAGTAATCAATATACACTTGCTAATGAAATTGAAGAAAAAGATATCAAATTATGGTTA…	MKLSDYYIDKELIYNSAISDIYTAIDKFNNLPVCLKIVDEDFSLPPHSIHREVLILKTLKPHPNIIEYFNDLKICDDIILVTKLYRYDLSQLIEITKYCKRTTRFIYGINGNLVSNQYTLANEIEEKDIKLWLKSMSSGLEFIHSQGIIHRDIKPSNIFFARDDITQPIIGDFDICYDLKSPPKDEPPMAKYIDVSTGIYKAPELILGITNYEYEIDIWSLGIILTGLYSENFQSVLVKDDKELTNDSHVSDLYLLNQIFENFGTPNLTDFEDELFCDEYNNENLHFKKFNLQKYPRKDWDIILPRCNDDFMKEIFTKMIRYDRSKRITSKEILQLMLD	CAK1, Monomeric CDK-activating kinase; functional homolog of S. cerevisiae Cak1p; phosphorylates cyclin-free human CDK2; lacks glycine loop motif; conserved lysine (K36) not required for activity; possibly essential gene (by UAU1 method	39918.4	4.93	36.21	Stable
C2_04290W_ST24	C2_04290W_A	chr2A	899422	900651	ATGTCTGCCAAAATAGAACTTGTAACGGAGAATGTCACCAATGGCCACTCAGGTGCGTCAGAAACCATCCAATACACTAAATCACAGATGGTTGGACATGGGTCATTCGGAGTGGTATTTCAAATACAACTTCAACCTTCCAATGAAATAGGAGCAGTGAAGCGTGTGTTACAGGACAAACGTTTCAAAAATCGTGAATTACAAATCATGAAATTGGTTCATCACAGAAATATAGCTGATTTGAAATACTATTTCTACACCAACAATGAAAAAAATGAACTTTACTTGAATTTGATTTTGGAGTTTGTACCAGAAACTCTTTACAAGGCTAGTCATTATTATGTTTCCAAAAGATTAAACATGCCTCCATTAGAAGTTAAATTATACACCTACCAAATG…	ATGTCTGCCAAAATAGAACTTGTAACGGAGAATGTCACCAATGGCCACTCAGGTGCGTCAGAAACCATCCAATACACTAAATCACAGATGGTTGGACATGGGTCATTCGGAGTGGTATTTCAAATACAACTTCAACCTTCCAATGAAATAGGAGCAGTGAAGCGTGTGTTACAGGACAAACGTTTCAAAAATCGTGAATTACAAATCATGAAATTGGTTCATCACAGAAATATAGCTGATTTGAAATACTATTTCTACACCAACAATGAAAAAAATGAACTTTACTTGAATTTGATTTTGGAGTTTGTACCAGAAACTCTTTACAAGGCTAGTCATTATTATGTTTCCAAAAGATTAAACATGCCTCCATTAGAAGTTAAATTATACACCTACCAAATG…	MSAKIELVTENVTNGHSGASETIQYTKSQMVGHGSFGVVFQIQLQPSNEIGAVKRVLQDKRFKNRELQIMKLVHHRNIADLKYYFYTNNEKNELYLNLILEFVPETLYKASHYYVSKRLNMPPLEVKLYTYQMFRALNYIHSQGICHRDIKPQNLLINPDTGELKLCDFGSAKILNPSEPNVSYICSRYYRAPELIFGATNYTTKIDVWSAGCVMAELILGQPLFPGESGIDQLVEIIKILGTPSREQIKNMNPNYMEHRFPQIKPIPLQKIFKKMSPDCIQFLIKVLQYSPIDRISCIEGLIDPYFDELRNENTKLPNYRKIFSQQFHSNNSSGFGNAANYQLYNSQPDLRDLPELFDFDDRELSVAPRLNKQLVPNWAYSHLRLNQHINSLDDFSPM…	RIM11, Ortholog of S. cerevisiae Rim11; a protein kinase involved in meiosis and sporulation in S. cerevisiae; mutant is viable	47273.5	7.16	41.68	Unstable
C2_04360W_ST25	C2_04360W_A	chr2A	911437	914340	ATGAATGGGATAGGATCATCTAAAGTTATTAATAATACTGCACAATTAGCTGCACAATTTAATGATTTTTATTTGGAAATTACTTCACCGAAAATAAGTCAAATTGGCAATTATAAAATCATCAAAGAAATTGGAGAAGGAGCATTTGGTAAAGCATATTTGGCAACTCATATACTACTAAATATTAATGTTGTATTAAAATGTGGATTAATCGATGATCCTAATATTGTTCGAGAGATATATTATCATAAACAATTGAAACATAAGAATATAGTTAGTCTATATGAAGTTATCAAAACCGAAAATCATTTATGGATTGCATTAGAATATTGCCAAGGTGGTGAATTGTATTATTACATATATGAGAAAAAGAGATTAGAATTAGATGAATGTCGAAAT…	ATGAATGGGATAGGATCATCTAAAGTTATTAATAATACTGCACAATTAGCTGCACAATTTAATGATTTTTATTTGGAAATTACTTCACCGAAAATAAGTCAAATTGGCAATTATAAAATCATCAAAGAAATTGGAGAAGGAGCATTTGGTAAAGCATATTTGGCAACTCATATACTACTAAATATTAATGTTGTATTAAAATGTGGATTAATCGATGATCCTAATATTGTTCGAGAGATATATTATCATAAACAATTGAAACATAAGAATATAGTTAGTCTATATGAAGTTATCAAAACCGAAAATCATTTATGGATTGCATTAGAATATTGCCAAGGTGGTGAATTGTATTATTACATATATGAGAAAAAGAGATTAGAATTAGATGAATGTCGAAAT…	MNGIGSSKVINNTAQLAAQFNDFYLEITSPKISQIGNYKIIKEIGEGAFGKAYLATHILLNINVVLKCGLIDDPNIVREIYYHKQLKHKNIVSLYEVIKTENHLWIALEYCQGGELYYYIYEKKRLELDECRNIFFQIVLGVKYVHSLNLSHRDLKLENILLADQKRTIVKLTDFGFIREFNPQSRKFLSTICGTTVYMAPELLTGQKYSGFVIDIWSMGVILYTMLNGMLPFDDDDEMKIQHKVINTEPMFYDHVPIDVNQLISKMLSKDPNQRPSLNEILNSSYLIDVYNKYLEKGTKRNSSGSGDAESIISINQHYNTVDRPFEAKIEKDLLRKLQRISFDTEELKATMYNNEINSLTAFYELLLTQEYSKKKQKYMREKKRKLYEAKKSLKKSRK…	orf19.4518, Protein kinase of unknown function; mutants are viable	108909	9.16	54.15	Unstable
C2_04660C_ST26	C2_04660C_A	chr2A	976775	979204	ATGGCATATAATAACAATAACAACAGTTCTAATTATAATTATAATTTTAATCGACACAATTCTATAGGAGGAAATTGGCATTTACCTCCACCACCACCTCCACCAACTCAACTTACTTCTAGTGGTGCATACCACCACCAACAACAACAACAGCACCTGCAGCAACATTTATCACCTAATCATCCTAATGGCCAAGATATTTTATCATCATCAGATTCTCAATTCCTGTCACAATTAAAACAAAATCAAATTCCTGGATTCCGTAACCCTTGGTTTTCTCAACAACAAAATTCTACCCCTAATATGTTATCATCTTCATCATCTGCATCATCTTCATTATCTCAATCACCGACTAAATCACATCAAATACCATTATTACAACAACATCAACCTCCATTA…	ATGGCATATAATAACAATAACAACAGTTCTAATTATAATTATAATTTTAATCGACACAATTCTATAGGAGGAAATTGGCATTTACCTCCACCACCACCTCCACCAACTCAACTTACTTCTAGTGGTGCATACCACCACCAACAACAACAACAGCACCTGCAGCAACATTTATCACCTAATCATCCTAATGGCCAAGATATTTTATCATCATCAGATTCTCAATTCCTGTCACAATTAAAACAAAATCAAATTCCTGGATTCCGTAACCCTTGGTTTTCTCAACAACAAAATTCTACCCCTAATATGTTATCATCTTCATCATCTGCATCATCTTCATTATCTCAATCACCGACTAAATCACATCAAATACCATTATTACAACAACATCAACCTCCATTA…	MAYNNNNNSSNYNYNFNRHNSIGGNWHLPPPPPPPTQLTSSGAYHHQQQQQHSQQHLSPNHPNGQDILSSSDSQFSSQLKQNQIPGFRNPWFSQQQNSTPNMLSSSSSASSSLSQSPTKSHQIPLLQQHQPPLLNKRLSFTNNLPITYEHESSSNSSSNNNSSSNGNGNNNNNDNNTNVPPYIHPPTRADNPFNHYFATQEVTLGSNDRRMSAAVDGTHYNPYGFNQQLNAYPSGPAGIAGTQYLNNPNLGPSVNANRRSSVGVLPNYYRQQQQQQVQDQSTAAAAAAAAAAAYYLPPARLGRSASIVQYQQYQQALQNQRITKHKNPAPKARKIYNKLDLTPKFHQQPKYRRCSINSIHISPVNALSIYLTESYSLCQPRKFQYSKSTNPKRVLTKPS…	YAK1, Predicted serine-threonine protein kinase; involved in hyphal growth regulation and biofilm formation; flow model biofilm induced; induced in core caspofungin response	91847.7	9.27	48.37	Unstable
C2_04760W_ST27	C2_04760W_A	chr2A	997716	1000391	ATGCAAATGAATGCAACATCATTATATAAACGTACAGAAGTTATTGGAAGAGGGAAATTTGGTGTTGTTTATAAAGCCCAAAATAAACAAACAAAGCAAATAGTTGCCATAAAAGTACTTAATCTTGATACTGAAGAAGATGAAGTTATTGATGTTCAACAAGAAATCCAATTTTTAAGTGAATTGAAAAATGTCCCTAATATCACTCATTATTATGGCTGTATTTTAAATGATACCAAATTATGGATCATTATGGATTATTGTGCTGGTGGATCATTACGAACATTATTAAAAGCTGGGGTATTAGAAGAAAGATATGTTGCTGTGATTGTACGTGAATTATTAATGACATTATCGGCAGTTCATAAATTGGGAGTTATCCATCGTGATTTAAAGGCT…	ATGCAAATGAATGCAACATCATTATATAAACGTACAGAAGTTATTGGAAGAGGGAAATTTGGTGTTGTTTATAAAGCCCAAAATAAACAAACAAAGCAAATAGTTGCCATAAAAGTACTTAATCTTGATACTGAAGAAGATGAAGTTATTGATGTTCAACAAGAAATCCAATTTTTAAGTGAATTGAAAAATGTCCCTAATATCACTCATTATTATGGCTGTATTTTAAATGATACCAAATTATGGATCATTATGGATTATTGTGCTGGTGGATCATTACGAACATTATTAAAAGCTGGGGTATTAGAAGAAAGATATGTTGCTGTGATTGTACGTGAATTATTAATGACATTATCGGCAGTTCATAAATTGGGAGTTATCCATCGTGATTTAAAGGCT…	MQMNATSLYKRTEVIGRGKFGVVYKAQNKQTKQIVAIKVLNLDTEEDEVIDVQQEIQFLSELKNVPNITHYYGCILNDTKLWIIMDYCAGGSLRTLLKAGVLEERYVAVIVRELLMTLSAVHKLGVIHRDLKAANVLISKEGNVQLCDFGVAAKITANSTKRTTMAGTPYWMAPEVIRTGDTYNSKADIWSLGITIYEIATGNPPYCDKDASWAMQLISKSTPPRLEGREFSQALKECIALCLDENPEERPSADDLMKCKLVKIYKNHPTSILKEVISRYLLWRDRNSSRDSVFINLENEQEDSVDEIVNKNLDGGYHNQQQQHQQQQQQNDHQDHDGHNNQIQVKWDFDSLSSREYIMENDIDLDKVNQQYNNNFDTQQGNTYSTLPTLKAPTTKNNT…	KIC1, Member of the GCK-III subfamily of eukaryotic Ste20p kinases; in RAM cell wall integrity signaling network; role in cell separation, azole sensitivity; required for hyphal growth; constitutive expression is MTL, white-opaque independent	96741.6	5.99	45.35	Unstable
C2_04930C_ST28	C2_04930C_A	chr2A	1027317	1029554	ATGTCTGTTATTGCTGGCCATCATGTGCCGAGGTCAAATGATCAAAGGCAATACGATACACCGAGCGTACCAATAAATATCGCTCCGGATTCAGAAGGTCATATTCATGAAATGTCTCGATTGAAAGATTATGAAGTGATAGAGAAACTAGGTCAAGGAACATTTGGAGTTGTTCAAAAAGCAAAATCCAAAAAAGATGGCCTGTTAGTTGCAATTAAACAATTGATTAACCATTCTGCAAAGGAAGGATTCCCAATCACTGCCATGCGAGAAATTACCATTTTGAAACAATTAAATCATAAAAATATTTTAACCATACAGGATATGATATTTGAAGAACCCAAAATGAGCAATCGAACAGATATTATTACTATGAGGGGTTCTTTTTATACTGTAACC…	ATGTCTGTTATTGCTGGCCATCATGTGCCGAGGTCAAATGATCAAAGGCAATACGATACACCGAGCGTACCAATAAATATCGCTCCGGATTCAGAAGGTCATATTCATGAAATGTCTCGATTGAAAGATTATGAAGTGATAGAGAAACTAGGTCAAGGAACATTTGGAGTTGTTCAAAAAGCAAAATCCAAAAAAGATGGCCTGTTAGTTGCAATTAAACAATTGATTAACCATTCTGCAAAGGAAGGATTCCCAATCACTGCCATGCGAGAAATTACCATTTTGAAACAATTAAATCATAAAAATATTTTAACCATACAGGATATGATATTTGAAGAACCCAAAATGAGCAATCGAACAGATATTATTACTATGAGGGGTTCTTTTTATACTGTAACC…	MSVIAGHHVPRSNDQRQYDTPSVPINIAPDSEGHIHEMSRLKDYEVIEKLGQGTFGVVQKAKSKKDGSLVAIKQLINHSAKEGFPITAMREITILKQLNHKNILTIQDMIFEEPKMSNRTDIITMRGSFYTVTPYMSSDLVGLLENPKIKLELGQIKCIMQQLLKGIQYVHNQKFLHRDIKAANILIGQDGVLKIADFGLARIYHGNVPRLGMGPGGGEKAYTGLVVTRWYRPPEILLGERKYTTAVDLWGIGCVFAELFTGKPILVGKSDSHQAQIVFELVGSPLTWTDAAKLPNKNEYSCGLACKRSLEAKFASIMPTEAIDLLSGLLTLDPFKRLNALDALNHKFFSTDPLPLLPTQMPKFEESHEIDKERFKKLKDKEQAVSELKPPTEIRYDNH…	CRK1, Protein kinase of the Cdc2 subfamily involved in hyphal development, virulence; promotes hyphal development independently of Cph1 and Efg1; functionally complements pheromone hypersensitivity of S. cerevisiae sgv1 mutant; Hap43p-repressed	83335.6	9.46	50.55	Unstable
C2_04980C_ST29	C2_04980C_A	chr2A	1038614	1039603	ATGATTAGCTCAAAATCAAGACCATACTCAATAGCCAGAGTCTATGCTGACGTGAATGAAAATAAACCTACTGAATATTGGGATTATGAGAATCATAAAATACAATGGGGGCTTATAAAGAACTATGAGATTGTCAGTAAAATAGGAAGAGGTAAATATTCAGAAGTTTTCCAAGGTGTCAATGTTTTAAATGATGAACCATGTGTCATCAAAGTATTAAAACCAGTTAAATTAAAGAAAATATATCGTGAAGTCAAAATATTACAAAATTTAACTGGAGGACCAAATATTATTGGATTATTGGATGTTGTTAGAGATGAACAATCGAAAATTCCTGCATTTATATTTGAAAGAGTTAATAATGTTGATTTTAGAGTTTTGTATCCTAAATTCACCATT…	ATGATTAGCTCAAAATCAAGACCATACTCAATAGCCAGAGTCTATGCTGACGTGAATGAAAATAAACCTACTGAATATTGGGATTATGAGAATCATAAAATACAATGGGGGCTTATAAAGAACTATGAGATTGTCAGTAAAATAGGAAGAGGTAAATATTCAGAAGTTTTCCAAGGTGTCAATGTTTTAAATGATGAACCATGTGTCATCAAAGTATTAAAACCAGTTAAATTAAAGAAAATATATCGTGAAGTCAAAATATTACAAAATTTAACTGGAGGACCAAATATTATTGGATTATTGGATGTTGTTAGAGATGAACAATCGAAAATTCCTGCATTTATATTTGAAAGAGTTAATAATGTTGATTTTAGAGTTTTGTATCCTAAATTCACCATT…	MISSKSRPYSIARVYADVNENKPTEYWDYENHKIQWGLIKNYEIVSKIGRGKYSEVFQGVNVLNDEPCVIKVLKPVKLKKIYREVKILQNLTGGPNIIGLLDVVRDEQSKIPAFIFERVNNVDFRVLYPKFTIKDIQYYFTQLLIALDYSHSMGIIHRDVKPQNIMIDPMNKKLRLIDWGLAEFYHAGMDYNVRVASRYHKGPELLINLQQYDYSLDLWSVGCMLGAIIFKKEPLFRGDSNNDQLVQIAKVLGTENLMKYVNKYGIKLSSEYDDILGNYPRKPWKAFINNDNRHLISDEVLDLIDRLLTYDHQLRPTAKEAMEHPFFKI	CKA2, Catalytic alpha-subunit of protein kinase CK2; interaction with calcineurin pathway affects fluconazole sensitivity; synthetically lethal with CKA1; attenuated virulence in a mouse oropharyngeal candidiasis but not in a systemic mouse model	38502.3	8.84	27.45	Stable
C2_05140W_ST30	C2_05140W_A	chr2A	1060271	1063651	ATGGTTTTAAATGATTTTGATTTGAAGACAGAAGCTTTAAATGAAAGGACAACTTTACACACGAGCCAGAATGCAAGTTCGAAGAATGGATCGAACAAAGAATCTGTTCTTGCCAAATATGAAGAGACCAATCAAAATGACGAAATAGAAGGGTTCGAAAACTTGAACGATTTATCATTTTCAAAATACTCAAAATTTTCCAAAGCATCGATTATAGTTGGGAGTGACCCCAAATCTAGAACTACAACGCTAGACTCACCATTTGCGAAGAAACTAAAGGAAGATTTAAATGTTGAATTCACGAGCGATAATACCAAGCCATATTATCCCACCGTGTATCCAATTTATGAATTTGATAACAATGATGAAAACAGTGATTCACCCTTCCTAGATTACCAA…	ATGGTTTTAAATGATTTTGATTTGAAGACAGAAGCTTTAAATGAAAGGACAACTTTACACACGAGCCAGAATGCAAGTTCGAAGAATGGATCGAACAAAGAATCTGTTCTTGCCAAATATGAAGAGACCAATCAAAATGACGAAATAGAAGGGTTCGAAAACTTGAACGATTTATCATTTTCAAAATACTCAAAATTTTCCAAAGCATCGATTATAGTTGGGAGTGACCCCAAATCTAGAACTACAACGCTAGACTCACCATTTGCGAAGAAACTAAAGGAAGATTTAAATGTTGAATTCACGAGCGATAATACCAAGCCATATTATCCCACCGTGTATCCAATTTATGAATTTGATAACAATGATGAAAACAGTGATTCACCCTTCCTAGATTACCAA…	MVLNDFDLKTEALNERTTLHTSQNASSKNGSNKESVLAKYEETNQNDEIEGFENLNDLSFSKYSKFSKASIIVGSDPKSRTTTLDSPFAKKLKEDLNVEFTSDNTKPYYPTVYPIYEFDNNDENSDSPFLDYQNEKGNIPQKLSGQKLRKQQQQQQQQSEAEENFKQSNQYARLQSTPKHQRTSSVKVSLTPAQKFEKRTSTRSHNALDNFELTTLVGNGAFASVYRAVNLKTNQVIAIKQIRIEKDQDVGVLMGEIDLLKILKHRNIVKYHGFVKTATSLNVLLEYCEGGSLRQLYKKLKKGLPEYQIINYVRQILEGLNYLHEQGVVHRDVKAANVLLTDKGDVKLADFGVATKVTSQHLTVVGTPNWMAPETVLGGEGICTASDIWSLGATIIELF…	CDC15, Ortholog(s) have protein serine/threonine kinase activity	128067	6.65	40.43	Unstable
C2_05320W_ST31	C2_05320W_A	chr2A	1093474	1095444	ATGCAAGAAGTTTTGTTTACATACCATCAACGTCTGGATCAACCTCCTCCACCACCTTCACAACAGTCGCATTTACACGCGTCGACTCCAACACCAACTCCCTTGAGTAATATGAAAAGAAAACAATCAAGTGAAAGTGATGATCCATTTAAAGATAGAAGTTGTAAATCGAGAAAAGATGCATCTACAGCAAATTTGTTACGGCTACAACAATCGCTTTCTAATAGTACATTTATTCGAAATTCAAATTTGAGTAAATCATACAAACATAACGAAACAACAGAAGTTGCTAATAATAATTTGCATGACACTACTTTTTCCCAAACAACAGAAACAGAAGAGTTTGTGACCCCAAACCAGTTAGATGAACAACTAGAGGTGGCAGGACGAGGAGGAAGA…	ATGCAAGAAGTTTTGTTTACATACCATCAACGTCTGGATCAACCTCCTCCACCACCTTCACAACAGTCGCATTTACACGCGTCGACTCCAACACCAACTCCCTTGAGTAATATGAAAAGAAAACAATCAAGTGAAAGTGATGATCCATTTAAAGATAGAAGTTGTAAATCGAGAAAAGATGCATCTACAGCAAATTTGTTACGGCTACAACAATCGCTTTCTAATAGTACATTTATTCGAAATTCAAATTTGAGTAAATCATACAAACATAACGAAACAACAGAAGTTGCTAATAATAATTTGCATGACACTACTTTTTCCCAAACAACAGAAACAGAAGAGTTTGTGACCCCAAACCAGTTAGATGAACAACTAGAGGTGGCAGGACGAGGAGGAAGA…	MQEVLFTYHQRSDQPPPPPSQQSHLHASTPTPTPLSNMKRKQSSESDDPFKDRSCKSRKDASTANLLRLQQSLSNSTFIRNSNLSKSYKHNETTEVANNNLHDTTFSQTTETEEFVTPNQLDEQLEVAGRGGRGVVVEEEQREEEEEEEEVTLEVLENMQKLETNFPILATDYRLIDKIGEGTFSTVYKAESLTGKIRLGSDIWKSPPLKRNKRNILNFQQSRKKNPIVALKQIYVTSSPNRIFNELHLLYMLSGNSRVAPLLDVLRFQDQIVAILPYYNHCDFREFYRDLPVKGIKKYLWELFQALDYIHGKGVIHRDLKPTNFLYDPFRGKGVLVDFGLAERENISKNTKPETSTTSSSGTATTTTTATTTTTTTTTTTTNSSTASSSAISTACPCL…	CDC7, Putative kinase; cell-cycle regulated periodic mRNA expression; S. cerevisiae ortholog is not cell-cycle regulated; possibly an essential gene, disruptants not obtained by UAU1 method	74960.6	5.97	53.98	Unstable
C2_05780C_ST32	C2_05780C_A	chr2A	1180382	1181722	ATGGCCCTGGTACCTCCACTTTTCAAAGTCCCTAATACGAAACGAACATCGAACAATAAAGTATTGCCAAACTTGTCAATCCCACCTACAAGCAATAATAAGAATGGCAACCCCAATACAAAACCCAGTCTACTGTTGAATCAGAACATTATTAATCATGATCTGCAACAGCATGAGAATTTGAACCCCTTGTCATATCAACCACACCAATTACAGCATCAGCAATACCAAAATCCTCAAGGACTCAAGTTGTCAACGTCTCCTTCATCTGTATCATCATCAAAATCAACAAAACGAAAACCACCACCAATAGATACCAAAGTCATTAGTCACTCTCCAGATATGATGGATGTTGATCAACAGGGCTCTGCTGACGAATCAGTAAATGTGGACGAGAAT…	ATGGCCCTGGTACCTCCACTTTTCAAAGTCCCTAATACGAAACGAACATCGAACAATAAAGTATTGCCAAACTTGTCAATCCCACCTACAAGCAATAATAAGAATGGCAACCCCAATACAAAACCCAGTCTACTGTTGAATCAGAACATTATTAATCATGATCTGCAACAGCATGAGAATTTGAACCCCTTGTCATATCAACCACACCAATTACAGCATCAGCAATACCAAAATCCTCAAGGACTCAAGTTGTCAACGTCTCCTTCATCTGTATCATCATCAAAATCAACAAAACGAAAACCACCACCAATAGATACCAAAGTCATTAGTCACTCTCCAGATATGATGGATGTTGATCAACAGGGCTCTGCTGACGAATCAGTAAATGTGGACGAGAAT…	MASVPPLFKVPNTKRTSNNKVLPNLSIPPTSNNKNGNPNTKPSLSLNQNIINHDSQQHENLNPLSYQPHQLQHQQYQNPQGLKLSTSPSSVSSSKSTKRKPPPIDTKVISHSPDMMDVDQQGSADESVNVDENEYSVKHHLEQLTPYDWHLIANANKIVEISSLGEGNGGAVTKCYIPQLPNKQIFALKLVMCDPNPDLQKQIFRELEVAKKCQHPNIVKYYGTFLLEKQSMIGIAMEFMDGQSLDSIYKEVLKRDKTNRINEKVLGKIANSILSGLDYLHSKNIIHRDIKPSNILLDTKGNVKLCDFGVSGEAVNSFASTFVGTQYYMAPERITGGNYSITSDIWSLGMSLLEVANGCFPIIQSLGPIEVVEIISRSNLELKDCEEDNIFWTREFKQF…	MKK2, Ortholog of S. cerevisiae Mkk2; MAP kinase kinase involved in signal transduction; macrophage-downregulated; mutants are viable and hypersensitive to caspofungin	50293.6	7.17	42.39	Unstable
C2_06600W_ST33	C2_06600W_A	chr2A	1341011	1343941	ATGACTATTGAAAGTAGATATCAAGCAGCAGCAGCAGCAACAACACCCAGTACACCACCACAGTTGCAAGAACAACTACAACTACAAGAACAGCCACCACTTACTAAAATATCATCACAATCAAAAGCATCAACACCTTCAGTATCGACATCAGCTCTTAAAAAGGCATCTTCATTATTCAAACTAAATACAAATTCACAATCACGAAATAAAAAGCATACCAATAAACAACAACAACAAAGTCAACCTTCACCTACATCTCCAAAAACATTAACGAATATTACTTCACGACAATCAACACCAACACCCACACCAACACCTTCAAATTCCACATCTCGTCCAAATTTAAGAAGTTTACTACGAATTGGTTCATTTTCCAATAATCAACCTCATATACAT…	ATGACTATTGAAAGTAGATATCAAGCAGCAGCAGCAGCAACAACACCCAGTACACCACCACAGTTGCAAGAACAACTACAACTACAAGAACAGCCACCACTTACTAAAATATCATCACAATCAAAAGCATCAACACCTTCAGTATCGACATCAGCTCTTAAAAAGGCATCTTCATTATTCAAACTAAATACAAATTCACAATCACGAAATAAAAAGCATACCAATAAACAACAACAACAAAGTCAACCTTCACCTACATCTCCAAAAACATTAACGAATATTACTTCACGACAATCAACACCAACACCCACACCAACACCTTCAAATTCCACATCTCGTCCAAATTTAAGAAGTTTACTACGAATTGGTTCATTTTCCAATAATCAACCTCATATACAT…	MTIESRYQAAAAAATTPSTPPQLQEQLQLQEQPPLTKISSQSKASTPSVSTSALKKASSLFKLNTNSQSRNKKHTNKQQQQSQPSPTSPKTLTNITSRQSTPTPTPTPSNSTSRPNLRSLLRIGSFSNNQPHIHSNNPHVKNPSITALEGEIEVKIDEEDIEEEDNIEEEDDEIAYLSDSESDLNYDPKAEESHEDYRTGGYHPVSKGEIYYSKKLPNREYIILRKLGWGHFSTVWLAKSRYNGNLSLEKEEEDDEEEEEVEESLLDSVDINEYYVAIKFVKSNKNYMEAARDEIKIMNVLNDPINNNHHIPKENISFFKNDNKLHPGYNHVMQLKDDFEISGPNGIHICMVFEILGENVLNLIYRYKRLYRNINSEIKRKESAEENICLQQQSQMKFS…	SKY2,orf19.35, Predicted kinase; rat catheter, flow model, Spider biofilm induced	111343	6.03	58.35	Unstable
C2_06670C_AGC06	C2_06670C_A	chr2A	1357769	1359901	ATGACAAATTTTTTCAATAGATCACCAAAACATCAATCACATCATTATCAACCACATCAACAGGATGTTACTGACATTTCTTATTCTATGGAAAATGTTTCTATTTCAAGTAATGCAATGATGGATATCGATACTAGTTATCGTTCATCTAAGCCTACTTATAACAATCCTCAACAACAACAACAACAACAACAACAACAACAAGCACAAAACAATTTGTTTAATAAGGAAAACATTACTCCTTTGAATTCACCAACAAAATCAATATTACATAATTCTCCACAACAAGCCAAATCATCTACTTCACCTCAACATTTATATAATAAATTGGTAAATGCCAATTATAATGGTAATTCTCCACAACCTGGGATCCAACAACAACAAAACAATCGAGCATTA…	ATGACAAATTTTTTCAATAGATCACCAAAACATCAATCACATCATTATCAACCACATCAACAGGATGTTACTGACATTTCTTATTCTATGGAAAATGTTTCTATTTCAAGTAATGCAATGATGGATATCGATACTAGTTATCGTTCATCTAAGCCTACTTATAACAATCCTCAACAACAACAACAACAACAACAACAACAACAAGCACAAAACAATTTGTTTAATAAGGAAAACATTACTCCTTTGAATTCACCAACAAAATCAATATTACATAATTCTCCACAACAAGCCAAATCATCTACTTCACCTCAACATTTATATAATAAATTGGTAAATGCCAATTATAATGGTAATTCTCCACAACCTGGGATCCAACAACAACAAAACAATCGAGCATTA…	MTNFFNRSPKHQSHHYQPHQQDVTDISYSMENVSISSNAMMDIDTSYRSSKPTYNNPQQQQQQQQQQQAQNNLFNKENITPLNSPTKSILHNSPQQAKSSTSPQHLYNKLVNANYNGNSPQPGIQQQQNNRALQNNINQLQPPLNKRYKLTEAEFYAKANSARTKRLTSIAQLYFLDYYCDMFDYVINRRERTAIVEKNLLTDPMYKNDITKQQFEWKNYIGRERALLRKRRLKPKHKDFEMITQIGQGGYGQVFLSRKRDTREICALKILNKKLLIKLDETRHVLTERDILTNTRSDWLVKLLYAFQDQEKVFLAMEFVPGGDFRTLLNNTGYLIPPHARFYISEMFAAVNSLHELGFTHRDLKPENFLIDSKGHIKLTDFGLAAGTVCNDRIESMKI…	DBF2, Essential serine/threonine protein kinase involved in mitotic spindle formation and cytokinesis; required for septum formation, exit from mitosis, and normal hyphal morphogenesis; virulence-group-correlated expression	82353	9.18	46.6	Unstable
C2_07130C_ST34	C2_07130C_A	chr2A	1453673	1455391	ATGAAAAGAAAGCAACAACAGCAGCCACAGCAATATCAACAACCATTTAGTACTGCTACTGCCAATGAAAATCCATTTCAACAAGCTTCCAACGAAACTCCAGACAGTATCAATGTTATCACCCCCAACGATATCATAAATGAATACCAACAACCAGATCAAGAACCACAACAATACTATCCCCAACAACAACAACAACAACAAGACCCATATCAACAGGAAACCCAATTCCAACAACAGCAACAAGGAGTGTATACCAACTATAATCAATCCGATGTTACCCTCAATGACAAAAACGCAGATTACAATAGAGTAGCGCTGCAACTTGTTGAAGAAGAGAATGAACAGAGAAAAAAATCTGTCAAATATCCAAACTTGGAAAATTATCAAATATTAGAC…	ATGAAAAGAAAGCAACAACAGCAGCCACAGCAATATCAACAACCATTTAGTACTGCTACTGCCAATGAAAATCCATTTCAACAAGCTTCCAACGAAACTCCAGACAGTATCAATGTTATCACCCCCAACGATATCATAAATGAATACCAACAACCAGATCAAGAACCACAACAATACTATCCCCAACAACAACAACAACAACAAGACCCATATCAACAGGAAACCCAATTCCAACAACAGCAACAAGGAGTGTATACCAACTATAATCAATCCGATGTTACCCTCAATGACAAAAACGCAGATTACAATAGAGTAGCGCTGCAACTTGTTGAAGAAGAGAATGAACAGAGAAAAAAATCTGTCAAATATCCAAACTTGGAAAATTATCAAATATTAGAC…	MKRKQQQQPQQYQQPFSTATANENPFQQASNETPDSINVITPNDIINEYQQPDQEPQQYYPQQQQQQQDPYQQETQFQQQQQGVYTNYNQSDVTLNDKNADYNRVASQLVEEENEQRKKSVKYPNLENYQILDQMGEGAFSVVYKAKHLSTGKEVAVKILRKFQMDQAQKQAVLKEVTIMRQLDHPNIVRFIEFIDSPTYYYIVQELVPGGEIFTMIVKYTYLSEDLSRWVITQIAHAIRYLHEEVGIVHRDIKPENLLYVPIDLKPSANPISKLRKSDDPNTKLDEGEFVNGVGGGGIGTVKLADFGLSKQIWEHNTKTPCGTVGYTAPEIVRDERYSKEVDMWALGCVLYTLLCGFPPFYDERIETLTEKVAKGEFTFLKPWWDEISDGAKNCVGRL…	RCK2, Predicted MAP kinase-activated protein kinase, similar to S. cerevisiae serine/threonine protein kinase Rck2p; induced by osmotic stress via Hog1p; macrophage/pseudohyphal-repressed; mutants are sensitive to rapamycin	65800.4	5.67	45.65	Unstable
C2_07210C_AGC07	C2_07210C_A	chr2A	1469096	1470337	ATGGACAATCATCAACAACAACAGCAGCTTCAGCATCAGCAATATCAGCAACAATTTCAACAACCGCAGCAACAACTTTATCCAGGCGAACAAATAGTTCACCCTGCTGCAGCCCAAACTGGACAAAATACTACAAATGTAACAGCAGTGTCGAGCTCCAACATTACCCAATCTGCTACCTCATCACTCCATTCACAGCAATTGCAGCATGTAGATGTTTCCAAATCGGCTGCTGAAGAAGCCATCAGAAGATCGTTGTTGCCTGAACGTTCTACTGTTTCAAAGGGGAAATACTCTTTGACTGATTTCTCAATTATGAGAACTTTGGGAACAGGTTCCTTTGGTAGAGTACATTTAGTGAGATCAGTTCACAATGGTAGATATTATGCTATCAAAGTT…	ATGGACAATCATCAACAACAACAGCAGCTTCAGCATCAGCAATATCAGCAACAATTTCAACAACCGCAGCAACAACTTTATCCAGGCGAACAAATAGTTCACCCTGCTGCAGCCCAAACTGGACAAAATACTACAAATGTAACAGCAGTGTCGAGCTCCAACATTACCCAATCTGCTACCTCATCACTCCATTCACAGCAATTGCAGCATGTAGATGTTTCCAAATCGGCTGCTGAAGAAGCCATCAGAAGATCGTTGTTGCCTGAACGTTCTACTGTTTCAAAGGGGAAATACTCTTTGACTGATTTCTCAATTATGAGAACTTTGGGAACAGGTTCCTTTGGTAGAGTACATTTAGTGAGATCAGTTCACAATGGTAGATATTATGCTATCAAAGTT…	MDNHQQQQQLQHQQYQQQFQQPQQQLYPGEQIVHPAAAQTGQNTTNVTAVSSSNITQSATSSLHSQQLQHVDVSKSAAEEAIRRSLLPERSTVSKGKYSLTDFSIMRTLGTGSFGRVHLVRSVHNGRYYAIKVLKKHQVVKMKQVEHTNDERRMLKLVEHPFLIRMWGTFQDSKNLFMVMDYIEGGELFSLLRKSQRFPNPVAKFYAAEVTLALEYLHSHDIIYRDLKPENILLDRNGHIKITDFGFAKEVSTVTWTLCGTPDYIAPEVITTKPYNKSVDWWSLGVLIFEMLAGYTPFYDSTPMKTYEKILAGKIHYPSFFQPDVIDLLTKLITADLTRRLGNLINGPADIRNHPWFSEVVWEKLLAKDIETPYEPPITAGVGDSSLFDHYPEEQLDYG…	TPK2, cAMP-dependent protein kinase catalytic subunit; isoform of Tpk1; needed for epithelial cell damage, engulfment and oral (not systemic) virulence in mice; control of morphogenesis and stress response; rat catheter, Spider biofilm repressed	47324.9	6.24	44.79	Unstable
C2_07330W_PI3K02	C2_07330W_A	chr2A	1490143	1497591	ATGTCAGCATCAGCATCTACATCAGCACAACTACAAGTGGTTGATGGTGTTGCTCTAACAGAGATTTTCAAAGGACTTACTTCGACGTCGGAAGAAGAGAGATCAAAATACGCAGAAGAACTACACAACTACCTATCTTCAATTGCACGAGATTTGTCCTCAGAACAATTTAACAGATATAACAACGACATCAACAAGACAATATTTGACTTATTACATGGTGAAAAAACCTCTGAGATATTAGGTGGTATAGCTGCCTTAAATGCATTGATTGAATTTGATTCTGGAGTGGGAAAAGAAAATGCAGGGAAAACAGCAAGATTTTCAAATTATCTTGGTTCTTTGATATTGTCTAATGACTTGGTCATTATGAAACAAGCTATTCGTACTTTGGGTAAG…	ATGTCAGCATCAGCATCTACATCAGCACAACTACAAGTGGTTGATGGTGTTGCTCTAACAGAGATTTTCAAAGGACTTACTTCGACGTCGGAAGAAGAGAGATCAAAATACGCAGAAGAACTACACAACTACCTATCTTCAATTGCACGAGATTTGTCCTCAGAACAATTTAACAGATATAACAACGACATCAACAAGACAATATTTGACTTATTACATGGTGAAAAAACCTCTGAGATATTAGGTGGTATAGCTGCCTTAAATGCATTGATTGAATTTGATTCTGGAGTGGGAAAAGAAAATGCAGGGAAAACAGCAAGATTTTCAAATTATCTTGGTTCTTTGATATTGTCTAATGACTTGGTCATTATGAAACAAGCTATTCGTACTTTGGGTAAG…	MSASASTSAQLQVVDGVALTEIFKGLTSTSEEERSKYAEELHNYLSSIARDLSSEQFNRYNNDINKTIFDLLHGEKTSEILGGIAALNALIEFDSGVGKENAGKTARFSNYLGSLILSNDLVIMKQAIRTLGKLATLGGNLTGDFVDFEAKRAIEWLQSDSKQHENRRHAAILIITSLADNASTLLYPLINQVLENLWTPLRDHKLIVREDAAIALEKCMHIIYDRDVNARSFWIKRMIESASKLLNENDAADGADSNSSYNITFSGQSTENIHGSLLTYRELLKYYKDPFIVSRFEQIYENTYLYKNHKVAIIRQELTNIFPLLCKVNTELFVEKYLHRTLYYYLSQLKKYKSQNNETANTDKSAIFKSIGLIALEVGNQMATYLDAILDNIREGLSY…	TOR1, Protein similar to TOR family phosphatidylinositol kinases; mutation confers resistance to rapamycin; involved in regulation of ribosome biogenesis, starvation response, and adhesion	281325	7.32	48.35	Unstable
C2_07530C_ST35	C2_07530C_A	chr2A	1535671	1537075	ATGGACGTGATTGGGATATTACAAATTATTCTAATTGATAATACGCAAGTACTTCTTAGCAAATTAAACAAAGACCAAGAAAAATATGCACGGCCTAGTATAAGTGGGAATGTAATCGTTGTTCCTTTACTAAGACAACAAGTCCTTACCATAGGAAGATCTCCAAAATGTAAAGTACAACTTATCAATCCAACTGTTTCAATGGAGCATTGTATAATCTGGGCAATTCAGTTTGATAGTGACTCAAACCTTATTACTTATATATTTGACAAGTCAAGAAATGGCATCAAACATAACGAAGCAGACATGCTGTTTGGACTCACTGGCATTTTGGAAAATAGAGATACAATTGAAATGAAAACAGCTGCACATATAACATATAAATGTTTGCAAACCGAA…	ATGGACGTGATTGGGATATTACAAATTATTCTAATTGATAATACGCAAGTACTTCTTAGCAAATTAAACAAAGACCAAGAAAAATATGCACGGCCTAGTATAAGTGGGAATGTAATCGTTGTTCCTTTACTAAGACAACAAGTCCTTACCATAGGAAGATCTCCAAAATGTAAAGTACAACTTATCAATCCAACTGTTTCAATGGAGCATTGTATAATCTGGGCAATTCAGTTTGATAGTGACTCAAACCTTATTACTTATATATTTGACAAGTCAAGAAATGGCATCAAACATAACGAAGCAGACATGCTGTTTGGACTCACTGGCATTTTGGAAAATAGAGATACAATTGAAATGAAAACAGCTGCACATATAACATATAAATGTTTGCAAACCGAA…	MDVIGILQIILIDNTQVLLSKLNKDQEKYARPSISGNVIVVPLLRQQVLTIGRSPKCKVQLINPTVSMEHCIIWAIQFDSDSNLITYIFDKSRNGIKHNEADMSFGLTGILENRDTIEMKTAAHITYKCLQTEVSSQTELDQPMEDWEISNKMIGCGSFGAVYVAKKPNNPKLFAVKITQNNQSGYFSNNSKPTQESYLLSKINHPNIIRIYDTITRNSKIFLFQDLICGGDLFSYLVKDDYLKVIPEREAIFIVFQIMKALHFLHKKLKIVHRDLKLDNILLELPIPGSKIYLCDFGIAKHLGYNNRTNTCVGTLEYSAPEVFKADKSGNKAVQSYDFKCDTWSLGVITHILLSGVSPFYSESKDKILKASRLGQLNFAKPQFSKISLSSKSYIKKLL…	orf19.1874, Ortholog(s) have protein serine/threonine kinase activity, role in meiotic recombination checkpoint, protein phosphorylation, reciprocal meiotic recombination, regulation of linear element assembly and cytosol, linear element localization	50659.1	9.16	35.54	Stable
C2_08270C_ST36	C2_08270C_A	chr2A	1671420	1672556	ATGAATTTTGGAACTAGTCATAGCAGTAGTAGTAAAAATTCCCACAATAATAATGTTGTGGGATTACATTATAAAATAGGTAAAAAAATTGGTGAAGGATCATTTGGAGTTATATTTGAAGGAGTAAATATTCTTAATAATGCTCAAGTTGCGATTAAATTTGAACCTCGGAAATGTGAAGCTCCACAATTACGTGATGAATATCGAGCATATAAACAATTACAAGGGAGTAAAGGTATTCCTAATGCTTATTATTTTGGTCAAGAAGGAGTACATAATATATTAGTGATTGATTTATTAGGACCTTCATTAGAGGATTTATTTGATTGGTGTGGTAGACGATTCAGTATTAAAACGGTAATTCAAGTAGCTATACAAATGATACGGTTAGTAGAACAA…	ATGAATTTTGGAACTAGTCATAGCAGTAGTAGTAAAAATTCCCACAATAATAATGTTGTGGGATTACATTATAAAATAGGTAAAAAAATTGGTGAAGGATCATTTGGAGTTATATTTGAAGGAGTAAATATTCTTAATAATGCTCAAGTTGCGATTAAATTTGAACCTCGGAAATGTGAAGCTCCACAATTACGTGATGAATATCGAGCATATAAACAATTACAAGGGAGTAAAGGTATTCCTAATGCTTATTATTTTGGTCAAGAAGGAGTACATAATATATTAGTGATTGATTTATTAGGACCTTCATTAGAGGATTTATTTGATTGGTGTGGTAGACGATTCAGTATTAAAACGGTAATTCAAGTAGCTATACAAATGATACGGTTAGTAGAACAA…	MNFGTSHSSSSKNSHNNNVVGLHYKIGKKIGEGSFGVIFEGVNILNNAQVAIKFEPRKCEAPQLRDEYRAYKQLQGSKGIPNAYYFGQEGVHNILVIDLLGPSLEDLFDWCGRRFSIKTVIQVAIQMIRLVEQVHQQNLIYRDIKPDNFLIGKPDTPEANQIFFVDFGMAKQYRDPRTKQHIPYREKKALSGTARYMSINTHLGREQSRRDDLESLGHVFMYFLRGALPWQGLKAPTNKQKYEKIGMKKQTTSINELCYGFPIQFAQYLTYVRNLKFDETPDYQYLVGLMEKASISAGIELDGHFDWMDLNGGKGWDAALNKKANLHGYGNPYPHPSQGQRRAATTAGTIQTTTIITKISTIQFTPSTITWEFSFKR	orf19.2222,YCK22, Putative casein kinase; plasma membrane-localized	42963.4	9.38	31.94	Stable
C2_08860W_ST37	C2_08860W_A	chr2A	1797497	1799881	ATGGTACAACTAGCTCTATTCACCAATAACAACCACAACAATAATAGCAATAGCAACACTCCAAATACTTTAAACGACGATACACAATATGATTCAACAACTATGAATACAGAAGATACTCCTATAATACCGGACAAGACCGATAAACTCAATGGACTGGATTCCCGATCTCTGTCAAGAAATAGAACTCGATCCATATCTTTCACGAGGTTTCTTTTCAATAGCAACAACAACAATAACAACAATAAAGACCACACTGAACAATCACGTTGTCCTTCAAATGAAACACTGGATAATTCTGTTGGTTCACCTGAACAACAAAATTCGGGGTTTAATAAATTGAAGAAAATGTTCAAAACTAATTCTTCTTTGACACAAGAAGATGGGAAAAATAGTGGA…	ATGGTACAACTAGCTCTATTCACCAATAACAACCACAACAATAATAGCAATAGCAACACTCCAAATACTTTAAACGACGATACACAATATGATTCAACAACTATGAATACAGAAGATACTCCTATAATACCGGACAAGACCGATAAACTCAATGGACTGGATTCCCGATCTCTGTCAAGAAATAGAACTCGATCCATATCTTTCACGAGGTTTCTTTTCAATAGCAACAACAACAATAACAACAATAAAGACCACACTGAACAATCACGTTGTCCTTCAAATGAAACACTGGATAATTCTGTTGGTTCACCTGAACAACAAAATTCGGGGTTTAATAAATTGAAGAAAATGTTCAAAACTAATTCTTCTTTGACACAAGAAGATGGGAAAAATAGTGGA…	MVQLALFTNNNHNNNSNNNTTNTLNDDTQYDSTTMNTEDTPIIPDKTDKLNGSDSRSSSRNRTRSISFTRFLFNSNNNNNNNKDHTEQSRCPSNETSDNSVGSPEQQNSGFNKLKKMFKTNSSLTQEDGKNSGRTRSASTPLTPPKVKKETSVPVITTTKAPNKEETTTTKIHSPPESPVVQSNPYFQYQGVPAHTNTSQNPQIETAPGRSDMSVALRHNDSVFSLNENGVLKPPKIHYSELSSSSEDNSEPSSPALPKTPMRDLVEKDELHLKPIEDERDLAIPASPFQRALRRVASAPLVHRLLNEKSPEDANNNNNNNNTGNNLGGPFSTSTQTSPKKDEPFDINKHIGEVKITGRPRTYTQDRTYSNAATRIVDVQVGPNSFEKVRLLGKGDVGK…	orf19.223, Putative serine/threonine protein kinase; Hap43-repressed; induced by prostaglandins; possibly an essential gene, disruptants not obtained by UAU1 method; flow model biofilm induced; Spider biofilm induced	89353.9	8.61	47.82	Unstable
C2_10260C_ST38	C2_10260C_A	chr2A	2112284	2113717	ATGTCAACTGATCATCATTCTCATCCAGTTGAAGGACATCAATTCAAAAAAATCTTTAATCGATTAAGTGGACAACCAGAATCATATAGTCGTAAACAAAATTATACTTTTGGTAAGACTTTAGGAGCAGGATCATTTGGAATTGTTAGATATGCTAGAGATAATAGTACTGATGAAGAAGTAGCTGTGAAAATAATTTTGAAAAAAGCTCTTAAAGGTAATGAATCAATGATTATTGATGAAATGCAATTATTAGAACAATTGAATAACCCTCATATTGTTGGATTTAGAGATTGGTTTGAAAGTAAAGATAAATTTTATTTAGTGACTCAATTAGCCACTGGAGGAGAATTATTTGATCGAATTGTTCAAAAAGGTCGATTCACTGAACATGATGCT…	ATGTCAACTGATCATCATTCTCATCCAGTTGAAGGACATCAATTCAAAAAAATCTTTAATCGATTAAGTGGACAACCAGAATCATATAGTCGTAAACAAAATTATACTTTTGGTAAGACTTTAGGAGCAGGATCATTTGGAATTGTTAGATATGCTAGAGATAATAGTACTGATGAAGAAGTAGCTGTGAAAATAATTTTGAAAAAAGCTCTTAAAGGTAATGAATCAATGATTATTGATGAAATGCAATTATTAGAACAATTGAATAACCCTCATATTGTTGGATTTAGAGATTGGTTTGAAAGTAAAGATAAATTTTATTTAGTGACTCAATTAGCCACTGGAGGAGAATTATTTGATCGAATTGTTCAAAAAGGTCGATTCACTGAACATGATGCT…	MSTDHHSHPVEGHQFKKIFNRLSGQPESYSRKQNYTFGKTLGAGSFGIVRYARDNSTDEEVAVKIILKKALKGNESMIIDEMQLLEQLNNPHIVGFRDWFESKDKFYLVTQLATGGELFDRIVQKGRFTEHDASLVVLQMLEALEYLHNKDIVHRDIKPENILYLTSKDDSPIVLADFGIAKRLQNPNEKLTSSAGSFGYAAPEVILGTGHGKPCDIWSLGVVTYTLLCGYSPFRSENVQDFINEVKHNNAVIFHADYWKDVSKDARRFIIKALQFNPDNRPTATELLNDPWLVSIAKEYKETDLLPNFKQGFDAKKKFRQAIELVKLNNRIKKLKEWQTDEDDDPTEINLFNEHGSVEQRANPSTNDGLTIPGTTSPRRGESPLNTWKKFNDVINSLD…	CMK2, Putative calmodulin-dependent protein kinase; involved in cell wall integrity and oxidative stress response	53773.1	6.42	31.26	Stable
C2_10530C_ST39	C2_10530C_A	chr2A	2169608	2170894	ATGTCGATTATCGATGAATATGAATCTCTTGAGGTTATTGGGAAAGGATCGTTTGGTACTGTACGACGAGTGCGTCATAAAGATGGCCAGATACTAGTTCGAAAAGAAATTGAGTATACTTCCATGACGAGTCAGGAAAGAAACCACATTATATCTGAATTGAGGATCCTTAGAGAGTTGGATCATCCACATATTGTCAAATACTATCGACATGATCATATACCAGAAAAGAAAATGATACACATATACATGGAGTATTGCGAAGGCGGGGACTTGGCAAAGGTTATTAAGAATTTTAGGGCCAGCAAGAGCCGGATTCCTGAAGAGTTTGTGTGGCAAGTACTTGTGCAGGTGTTGTTGGCGTTGTATAGATGTCATTATGGAGTTGATGCAGAGAAA…	ATGTCGATTATCGATGAATATGAATCTCTTGAGGTTATTGGGAAAGGATCGTTTGGTACTGTACGACGAGTGCGTCATAAAGATGGCCAGATACTAGTTCGAAAAGAAATTGAGTATACTTCCATGACGAGTCAGGAAAGAAACCACATTATATCTGAATTGAGGATCCTTAGAGAGTTGGATCATCCACATATTGTCAAATACTATCGACATGATCATATACCAGAAAAGAAAATGATACACATATACATGGAGTATTGCGAAGGCGGGGACTTGGCAAAGGTTATTAAGAATTTTAGGGCCAGCAAGAGCCGGATTCCTGAAGAGTTTGTGTGGCAAGTACTTGTGCAGGTGTTGTTGGCGTTGTATAGATGTCATTATGGAGTTGATGCAGAGAAA…	MSIIDEYESLEVIGKGSFGTVRRVRHKDGQILVRKEIEYTSMTSQERNHIISELRILRELDHPHIVKYYRHDHIPEKKMIHIYMEYCEGGDLAKVIKNFRASKSRIPEEFVWQVLVQVLLALYRCHYGVDAEKVNLFKTASEPKYANSIIHRDIKPDNIFVGSCIKLGDFGLAKMLSANDFAKTYVGTPYYMSPEVLLDDPYSPVCDIWSLGCVLYELCTLEPPFKAKSHLQLQAKIKRGVIEEVPDFYSSQLRTLIRSCITVDPEERPTCFDLIDSLAVRFLRKEMELKEMNENLEEYKKQLLKRSKELKETSKELDEYKQELVRKSEELSKREKYLDEEFELRKQAIELESKEIRMEYQREFNLVVEQEVKRRLEQRKPHGPRPLEDVSPRSPLKER…	KIN3, Protein similar to S. cerevisiae Kin3p; induced under Cdc5p depletion; shows Mob2p-dependent hyphal regulation; mutants are hypersensitive to caspofungin	50719.6	7.21	61.65	Unstable
C2_10750C_ST40	C2_10750C_A	chr2A	2208732	2210936	ATGGGTCATCTTCCAAAACTTCCAGAGGGCACAGTTCTCCAGGTTGGAAAACACAAGGTTACTGTTGTCAAATACCTTTCCGAAGGTGGGTTTGCCCATATTTACAAAGTTACAATAGACCCATTAGAGAACGAGTCCGACATTGCATGTTTGAAACGAGTGATTGTGCCAGATAAGAATGGATTGAATGAGTTGCGCAAAGAAGTTGATGTTATGAAGACATTGCGCCATAGCAGAAACATTGTAAAGTATTATGACTCACATGCTGAACGATTAGAAAATGGCACCTATCAGGTATTGGTGTTGATGGAATTGTGCCCCAACGGTTCATTACTAGACTATATGAATAAACATATCAAAACAAAACTAACAGAGCCACAGATCCTCAAAATCATGTTG…	ATGGGTCATCTTCCAAAACTTCCAGAGGGCACAGTTCTCCAGGTTGGAAAACACAAGGTTACTGTTGTCAAATACCTTTCCGAAGGTGGGTTTGCCCATATTTACAAAGTTACAATAGACCCATTAGAGAACGAGTCCGACATTGCATGTTTGAAACGAGTGATTGTGCCAGATAAGAATGGATTGAATGAGTTGCGCAAAGAAGTTGATGTTATGAAGACATTGCGCCATAGCAGAAACATTGTAAAGTATTATGACTCACATGCTGAACGATTAGAAAATGGCACCTATCAGGTATTGGTGTTGATGGAATTGTGCCCCAACGGTTCATTACTAGACTATATGAATAAACATATCAAAACAAAACTAACAGAGCCACAGATCCTCAAAATCATGTTG…	MGHLPKLPEGTVLQVGKHKVTVVKYLSEGGFAHIYKVTIDPLENESDIACLKRVIVPDKNGLNELRKEVDVMKTLRHSRNIVKYYDSHAERLENGTYQVLVLMELCPNGSLLDYMNKHIKTKLTEPQILKIMLDICQGIYEMHKLKLVHRDIKIENVLIDSKNQFQLCDFGSTAIPTMPPQDQQQFNYLSHDILYHTTPQYRSPEMVDLYRGIPIDEKADIWALGCFLYKLCYYTTPFEANGDIAILHASFQFPPYPEYSGDLKNLIIIMLQENPLFRPNIVQVLILVCKLMSIDFAKLKLKDFYNAGPYNFQALHEYQVHKQNELLRQKQLYYQQHALANSEAGLTKEPPVAAGDSLPADGKELASTESQPEHHAKPAATPSIDSQLSPEIKSTTLGV…	AKL1, Putative serine/threonine protein kinase; induced during the mating process	81870.9	5.55	51.59	Unstable
C3_00550C_ST41	C3_00550C_A	chr3A	78180	80270	ATGCCAGATAAACATAAACTCAAACTATTTGGAAAAAATAAACACGACAAAGATGACGAATTGTCCTTGTCAACGTCAAACCATTCTCACGGAAGTACACGGAAGTTTTTAGGATTTCATATTGGAAGACATGAATCGGGCGACTCGTTGACTTCTCCAGTTATGAGCAATTCATCCGAAAGTCATCATCACAGCCATCACCCTCATCAAGCCAATTCAAGTGCAAACCATCGTAACCCTTCTCCAGTTCATTCCAATACTGGTACTGCCACTACCATTCCATCAATACAATCACCACAACCTCAAGCATCTGGATTACACCGCGGGGACTCCGATAAAAAATCATCTGGCTCAGTTGTTGATTTGAAAAAATTCTTCAAAACAAAGAAAACTTCAAAT…	ATGCCAGATAAACATAAACTCAAACTATTTGGAAAAAATAAACACGACAAAGATGACGAATTGTCCTTGTCAACGTCAAACCATTCTCACGGAAGTACACGGAAGTTTTTAGGATTTCATATTGGAAGACATGAATCGGGCGACTCGTTGACTTCTCCAGTTATGAGCAATTCATCCGAAAGTCATCATCACAGCCATCACCCTCATCAAGCCAATTCAAGTGCAAACCATCGTAACCCTTCTCCAGTTCATTCCAATACTGGTACTGCCACTACCATTCCATCAATACAATCACCACAACCTCAAGCATCTGGATTACACCGCGGGGACTCCGATAAAAAATCATCTGGCTCAGTTGTTGATTTGAAAAAATTCTTCAAAACAAAGAAAACTTCAAAT…	MPDKHKLKLFGKNKHDKDDELSLSTSNHSHGSTRKFLGFHIGRHESGDSLTSPVMSNSSESHHHSHHPHQANSSANHRNPSPVHSNTGTATTIPSIQSPQPQASGLHRGDSDKKSSGSVVDLKKFFKTKKTSNPRKEGHSILGQYSNQLHSPPPMAQVHSPGAGSGNGSALQSREQSSTSLATLINQTSSQLLYNASHSVNSNRDPFTDDNSPLVKKYGKIGKELGSGAGGSVKLITRPSDSKTFAVKEFRAKRSTESLKDYTRKCTAEYCIGSTLRHPNIIKTIDIIHENNRYFEIMEYAPIDFFAVVMSGEMSRTEINCCLKQIIEGVAYLHKLGLAHRDLKLDNCVITNEGILKIIDFGSAVIFKYPYEQFGNNNSIQPCHGIVGSDPYLAPEVLK…	HRK1, Putative serine/threonine kinase; predicted role in cellular ion homeostasis; Spider biofilm repressed	78496.1	7.1	47.77	Unstable
C3_00790W_ST42	C3_00790W_A	chr3A	148258	150693	ATGGATACAAATAAATTAGCAATTGTACTAGATCCCAAATCGAACCGGAAAATAATTAATCATAGATATAAAATCATAAAGAAAATAGGTCAAGGGCAATATGGGAAAGTATTATTGGGAGAAGATGTTACAACTACGGTAACTTCCACTGAAAAGAATAAGTCAACCACGATTTCAACTTACGTTGCCATAAAAACTATTAATCGAATAGATAAATCGAGACTATTATTAGTGAAGAATTCTAGTAATAACATCAGCATGAAGATTAAACGTGAGATATCAATAATGAAACAATGCAATCATCCTAATATTGTTAAATTGTACCAAGTAATTGATGATTTAAGATTTGATAAAATATTATTGATTTTAGAATATTGTCAATATGGTGAAATTGACTGG…	ATGGATACAAATAAATTAGCAATTGTACTAGATCCCAAATCGAACCGGAAAATAATTAATCATAGATATAAAATCATAAAGAAAATAGGTCAAGGGCAATATGGGAAAGTATTATTGGGAGAAGATGTTACAACTACGGTAACTTCCACTGAAAAGAATAAGTCAACCACGATTTCAACTTACGTTGCCATAAAAACTATTAATCGAATAGATAAATCGAGACTATTATTAGTGAAGAATTCTAGTAATAACATCAGCATGAAGATTAAACGTGAGATATCAATAATGAAACAATGCAATCATCCTAATATTGTTAAATTGTACCAAGTAATTGATGATTTAAGATTTGATAAAATATTATTGATTTTAGAATATTGTCAATATGGTGAAATTGACTGG…	MDTNKLAIVLDPKSNRKIINHRYKIIKKIGQGQYGKVLLGEDVTTTVTSTEKNKSTTISTYVAIKTINRIDKSRLLLVKNSSNNISMKIKREISIMKQCNHPNIVKLYQVIDDLRFDKILLILEYCQYGEIDWKRYNHYREKYRKIDTESTRGNTNSIPQTRLTLNKILRDIINGLEYLHDYKHIIHRDLKPSNLLINQDNTVKISDFGVSLLLENNANDAKELAKIMGTPAFYAPELCQFVNNRFSMVTNEDHAGNKIKISYNIDIWSLGVTLYCLSFNNLPFNGNNEFEMCKNIVKSELQFPLIKHSSKVTENDIQELKCLKDLIKKILVKDPDERISLKEIKVHPFTTFDLSELEKKKFFKFNQNIFKAEDCKKELDVDGAIPASSPQSSSLSKRI…	orf19.5376, Ortholog of S. cerevisiae Elm1; a serine/threonine protein kinase that regulates cellular morphogenesis, septin behavior, and cytokinesis in S. cerevisiae; possibly an essential gene, disruptants not obtained by UAU1 method	91037.3	6.47	46.62	Unstable
C3_02260C_ST43	C3_02260C_A	chr3A	489114	490874	ATGTCAGATAGATATAGACCAAGAGGCCCTAGAAACCAACAACGTGGTGGTTATCAAAGTCGATCATCTTATATACCTCAACGTCGAGACAATCGTAATAGAGATAGTTACATTCCTTCTGGCCCAAAAAGGCTGGCAGAGAGGGATAACTATCGACCTGACAATGACCGATACCAACAACAAGAGAATAGACCTGCATCATCAATACCACATAGAGAATCACCATCATCGTTATCTGGTGCAACGGCTCTGCATCCATCACCCAAAGGGCCAAGAGATTCTTATGCATCTGGAATGAAAAGACCGTTGCCTTCGGGACCAGCAAGCTTCCGGAAAAGACGTGATTTCAATTCTAACTCCAACAGAATACCAATTCCAAAGGGACCAAGACAGGGATTT…	ATGTCAGATAGATATAGACCAAGAGGCCCTAGAAACCAACAACGTGGTGGTTATCAAAGTCGATCATCTTATATACCTCAACGTCGAGACAATCGTAATAGAGATAGTTACATTCCTTCTGGCCCAAAAAGGCTGGCAGAGAGGGATAACTATCGACCTGACAATGACCGATACCAACAACAAGAGAATAGACCTGCATCATCAATACCACATAGAGAATCACCATCATCGTTATCTGGTGCAACGGCTCTGCATCCATCACCCAAAGGGCCAAGAGATTCTTATGCATCTGGAATGAAAAGACCGTTGCCTTCGGGACCAGCAAGCTTCCGGAAAAGACGTGATTTCAATTCTAACTCCAACAGAATACCAATTCCAAAGGGACCAAGACAGGGATTT…	MSDRYRPRGPRNQQRGGYQSRSSYIPQRRDNRNRDSYIPSGPKRSAERDNYRPDNDRYQQQENRPASSIPHRESPSSLSGATASHPSPKGPRDSYASGMKRPLPSGPASFRKRRDFNSNSNRIPIPKGPRQGFNEMDGGNGNGNGNVDNYRRARQPEKQKLSLEQIYCIKTTNRPNIYQRVSQVGEGTYGKVYKAQHKLTGEYVAMKKLRLESEKEGFPITAIREIKLLQSFDHANIVGLLEMMVEYNQIYMVFDYLDHDLTGLLTHPDLQLQECHRKFIFKQLMEGLNYLHKKRIIHRDIKGSNILLDNIGRLKIADFGLARTMKIVGANEKPDYTNRVITIWYRPPELLLGATDYGREVDVWGVGCLLIELYCKMAAFRGMDEVSQLCRIFNIMGTP…	CTK1,orf19.1619, Putative kinase subunit of RNA polymerase II carboxy-terminal domain kinase I; possibly an essential gene, disruptants not obtained by UAU1 method	67172.4	9.29	50.01	Unstable
C3_03810W_ST44	C3_03810W_A	chr3A	799952	802051	ATGGAAGTAACACAACGGACGCAGAGTCAGACACAACCAACACAACAGTCACCGACAACTCAGACGCAAACCCAAAGCAAAGAGGACCAGAATAGGATTTGTCAATTGATTTGCTCCACGGGTCAGTTTGGCAATTATGATTTGAATATCAACGATAAAACTATCGTACAAGGTAAAATGACGTGGTATTTTGGAAGAGACCCCAACTCAGATTTGCAAGTGGCGTCGTCGTCGAGAATTTCAAACAAGCATTTTCAAATCTGGCTCAACTTCAATGATAAATCACTATGGATAAAGGACACTTCAACTAACGGGACACACCTTAACAACAGTCGATTGGTGAAAGGATCAAACTACCTTCTTAATCAGGGTGATGAAATAGCAGTAGGGGTTGGTAGA…	ATGGAAGTAACACAACGGACGCAGAGTCAGACACAACCAACACAACAGTCACCGACAACTCAGACGCAAACCCAAAGCAAAGAGGACCAGAATAGGATTTGTCAATTGATTTGCTCCACGGGTCAGTTTGGCAATTATGATTTGAATATCAACGATAAAACTATCGTACAAGGTAAAATGACGTGGTATTTTGGAAGAGACCCCAACTCAGATTTGCAAGTGGCGTCGTCGTCGAGAATTTCAAACAAGCATTTTCAAATCTGGCTCAACTTCAATGATAAATCACTATGGATAAAGGACACTTCAACTAACGGGACACACCTTAACAACAGTCGATTGGTGAAAGGATCAAACTACCTTCTTAATCAGGGTGATGAAATAGCAGTAGGGGTTGGTAGA…	MEVTQRTQSQTQPTQQSPTTQTQTQSKEDQNRICQLICSTGQFGNYDLNINDKTIVQGKMTWYFGRDPNSDLQVASSSRISNKHFQIWLNFNDKSLWIKDTSTNGTHLNNSRLVKGSNYLLNQGDEIAVGVGRDEDVVRFVVVFGDKYNPAKLPDSTNTIKDEGIYKDFIVKNETIGQGAFATVKKAIERSTGESYAVKIINRRKALNTGGGSAMAGVDRELSILERLNHPNIVALKAFYEDMDNYYIVMELVPGGDLMDFVAANGAIGEDATQVITKQILEGIAYVHNLGISHRDLKPDNILIMQDDPILVKITDFGLAKFSDNSTFMKTFCGTLAYVAPEVITGKYGSSQMESQQKDNYSSLVDIWSLGCLVYVLLTSHLPFNGKNQQQMFAKIKRG…	RAD53, Protein involved in regulation of DNA-damage-induced filamentous growth; putative component of cell cycle checkpoint; ortholog of <i>S. cerevisiae</i> Rad53p, protein kinase required for cell-cycle arrest in response to DNA damage	78317.7	6.03	43.52	Unstable
C3_04470W_AGC08	C3_04470W_A	chr3A	930989	934282	ATGTCGACGTCACAGCCGTCACAACAACAAAACCCAGAACAAGTTGTCAATGATATTAGGCAAAAAATAGAAAAAGAACGGAAAATCATTCAAGGTTTCAATGATGTCAAAAGAAATACCAACAATCCAGAGGTGATTCAGAAATGTAAATCGAAAATCATTGAATCACAATCAATGATTGATTACTACCAAGAAACTATGAACAAATTAACTCGACAGATGCTGCGTTTAAATACTAATTCCAGTTCACGGACAGCTAGTAGGAGCTCGGTCATTTCTGAGTACAAGCCATCGTACTCCAATTTTGATTTGATTAAATACGAATGTCCCTCACTTGGTAATAAGATTCAATTTATGTTGCAATATTTGGAATTCAAACTCCAAGTCGAAAATAAGTAT…	ATGTCGACGTCACAGCCGTCACAACAACAAAACCCAGAACAAGTTGTCAATGATATTAGGCAAAAAATAGAAAAAGAACGGAAAATCATTCAAGGTTTCAATGATGTCAAAAGAAATACCAACAATCCAGAGGTGATTCAGAAATGTAAATCGAAAATCATTGAATCACAATCAATGATTGATTACTACCAAGAAACTATGAACAAATTAACTCGACAGATGCTGCGTTTAAATACTAATTCCAGTTCACGGACAGCTAGTAGGAGCTCGGTCATTTCTGAGTACAAGCCATCGTACTCCAATTTTGATTTGATTAAATACGAATGTCCCTCACTTGGTAATAAGATTCAATTTATGTTGCAATATTTGGAATTCAAACTCCAAGTCGAAAATAAGTAT…	MSTSQPSQQQNPEQVVNDIRQKIEKERKIIQGFNDVKRNTNNPEVIQKCKSKIIESQSMIDYYQETMNKLTRQMSRLNTNSSSRTASRSSVISEYKPSYSNFDLIKYECPSLGNKIQFMLQYLEFKLQVENKYSEANKKLSHLYLMDGDKSSSNAAEGGRAESDQRIQLLEKALKKYQKFSINDHEFDRDYEIMDSTKHSRKLLTGRLTVSITCIRDVDHIATALAKKRETVVVIKVDDLEKARTKPSKNDNWNEEMVIDVDKSHEIELAVMDKQNGIYVPVAVNWFSLFDLAEEIRKKKVAKDQGSSGWLPAANLPQTGGSGAGTGSSMTGGASYGATSPLPAHNDLRPSVSPSSDAKENKVSVSTWLSLEPGGQMLINLNFEKSITNGKQFRGPLGR…	PKC1, Protein kinase C; functional homolog of S. cerevisiae Pkc1p; mutant has abnormal yeast-form cell morphology and increased cell lysis; activated by phosphatidylserine; target of antifungal, cercosporamide; R400P mutant is activated	125244	7.1	49.9	Unstable
C3_04550C_ST45	C3_04550C_A	chr3A	960547	961794	ATGACCAAGACAGGCAAGTTTACACCTTGGGATGAAACCACTGGAAACAAGACAACGACTGCCAACAACACTTCCTATATCTTATCCAAAAAGCCTTTGGGAGATGGATCATATTCTGTTGTATTTGAGTGCAAAAACACATCTACTGGAAGACACTATGCCGCAAAGAAATACACCAAGAGGTTGATGTATGGGTTTGAGAATATGCTTAAAAACGAATTTAAAGTTTTAAATCGAATTTCTTTATCTCATAGTCATCTTTTGTCACTCATAGATTTTTTTGAAACTGAGGAGAGCTTCTATTTAGTGACAGATCTAGCTCGCGGCGGAGATTTATGGAACAAGATAGCTGAAGAAGAAAAATTAAATGAGCAAACCACTCGCACGATAACAAGACAA…	ATGACCAAGACAGGCAAGTTTACACCTTGGGATGAAACCACTGGAAACAAGACAACGACTGCCAACAACACTTCCTATATCTTATCCAAAAAGCCTTTGGGAGATGGATCATATTCTGTTGTATTTGAGTGCAAAAACACATCTACTGGAAGACACTATGCCGCAAAGAAATACACCAAGAGGTTGATGTATGGGTTTGAGAATATGCTTAAAAACGAATTTAAAGTTTTAAATCGAATTTCTTTATCTCATAGTCATCTTTTGTCACTCATAGATTTTTTTGAAACTGAGGAGAGCTTCTATTTAGTGACAGATCTAGCTCGCGGCGGAGATTTATGGAACAAGATAGCTGAAGAAGAAAAATTAAATGAGCAAACCACTCGCACGATAACAAGACAA…	MTKTGKFTPWDETTGNKTTTANNTSYILSKKPLGDGSYSVVFECKNTSTGRHYAAKKYTKRLMYGFENMLKNEFKVLNRISLSHSHLLSLIDFFETEESFYLVTDLARGGDLWNKIAEEEKLNEQTTRTITRQLVESVEFLHKHQILHHDIKAENVFFQSKHQDTILLGDFGLAKILQPQEKLHEVAGTLSYMAPEMLDYKIGYDFPIDVWALGVCVYFMLCGYMPFDCDDDEETKDAIRSRKYLFEPSEYWVDVSSEAKDFILACLQVDPQKRLTASQLLQHSFLKINSTKPAITISSPLKRSFSNLSALQRDQIKNILQKVGGVSAPALSHSSSINEKLERGRFDSLNKDATLNGAICPSPECVSIFSSPANSTSVSRDGSGLNIFEESLKWDSSQK…	CMK1, Putative calcium/calmodulin-dependent protein kinase II; expression regulated upon white-opaque switching; biochemically purified Ca2+/CaM-dependent kinase is soluble, cytosolic, monomeric, and serine-autophosphorylated; Hap43p-repressed	46808.4	6.43	54.78	Unstable
C3_05300C_CK01	C3_05300C_A	chr3A	1168278	1170146	ATGGTGGTGGAGGAAGAAGGGGTTACATTTATCAACAACAACAATTGGAGTAAGAGAGCAAAAAAAAAAAAAATTTCCCCCAACAATCTTATCAAGAAGTTTAAGTCTTTATCTTTTATATATACATTGTATACTAGCCCTCCCCAATTCATGATGGAGATATCACCAGCTAATATTAAAGAACAATCACGATCCAGATCCAGATCAAGAACTAGAAATTCAACGGCAAATTCTCGATCAACTAGTGCCACTAGAAGACCTAGTTTATCTTCCACCCATAGAAGATCATTATCTTCATCATCATTAAACAAATTAACTATAACCACCACACAAGTTGATCAAGAAAGATCAGTTCCTTCAGTTCAAGTTTATTTAGATAATTCATTACCATTAGATTTT…	ATGGTGGTGGAGGAAGAAGGGGTTACATTTATCAACAACAACAATTGGAGTAAGAGAGCAAAAAAAAAAAAAATTTCCCCCAACAATCTTATCAAGAAGTTTAAGTCTTTATCTTTTATATATACATTGTATACTAGCCCTCCCCAATTCATGATGGAGATATCACCAGCTAATATTAAAGAACAATCACGATCCAGATCCAGATCAAGAACTAGAAATTCAACGGCAAATTCTCGATCAACTAGTGCCACTAGAAGACCTAGTTTATCTTCCACCCATAGAAGATCATTATCTTCATCATCATTAAACAAATTAACTATAACCACCACACAAGTTGATCAAGAAAGATCAGTTCCTTCAGTTCAAGTTTATTTAGATAATTCATTACCATTAGATTTT…	MVVEEEGVTFINNNNWSKRAKKKKISPNNLIKKFKSLSFIYTLYTSPPQFMMEISPANIKEQSRSRSRSRTRNSTANSRSTSATRRPSLSSTHRRSLSSSSLNKLTITTTQVDQERSVPSVQVYLDNSLPLDFFKQDIIALTKTLKISKWHKRQLTINNLSINRISGALTNAIYKIEYHDESQNIHLPTLLLRVYGKNVDELIDRDNELAILIKLSQKRIGPRLLGIFSNGRFEQFLDGFITLNKEQIRDEILSQMLGRRMKDLHYKIELDAKDYESKQPTCWNLIDKWLKIFEQELLPGYLEVNYNLQDIFIVPFDQFKQIITKYKQWLFNKYDDKHFTNNYKFCHNDTQYGNLLLHESFNPKDIVVSTSDTTNSSNNIIDGEVTIKSTSNKKDTNLV…	CKI1,orf19.6966, Ortholog(s) have choline kinase activity, ethanolamine kinase activity, role in phosphatidylcholine biosynthetic process, phosphatidylethanolamine biosynthetic process and cytosol, nucleus localization	72323.1	5.93	47.2	Unstable
C3_05420W_ST46	C3_05420W_A	chr3A	1205678	1207435	ATGCCATTCAAAAATATATTCACATCGTCTTCTTCATCATCTTCATTAAATGAAGATAATGTAATTAAATCAACATCATCACATCGGACAATTCTTAAACAAAGAGATACTTCTTCATTACTGGCATCACCTCAATCAACATCTTCTAGGATTAATAATAATAATAATAATCATCCTCGAAATAGCAACAATAATAATATCAACACCGATCACCCAATGCATATTGCTCCTAGTATAAATAGTAATATGAGTCAATCAAGTCTAAGCACTGCTGGAACTACTGGAACTACCACCATTAACAACAACAACAACAGTACAACAACACATTCCCCTACTTCTACTAAATCCCATCGTGGTCCTTCATTAAGAAGATTCTTTAAAAAATTCAAACCACGTGAC…	ATGCCATTCAAAAATATATTCACATCGTCTTCTTCATCATCTTCATTAAATGAAGATAATGTAATTAAATCAACATCATCACATCGGACAATTCTTAAACAAAGAGATACTTCTTCATTACTGGCATCACCTCAATCAACATCTTCTAGGATTAATAATAATAATAATAATCATCCTCGAAATAGCAACAATAATAATATCAACACCGATCACCCAATGCATATTGCTCCTAGTATAAATAGTAATATGAGTCAATCAAGTCTAAGCACTGCTGGAACTACTGGAACTACCACCATTAACAACAACAACAACAGTACAACAACACATTCCCCTACTTCTACTAAATCCCATCGTGGTCCTTCATTAAGAAGATTCTTTAAAAAATTCAAACCACGTGAC…	MPFKNIFTSSSSSSSLNEDNVIKSTSSHRTILKQRDTSSLSASPQSTSSRINNNNNNHPRNSNNNNINTDHPMHIAPSINSNMSQSSLSTAGTTGTTTINNNNNSTTTHSPTSTKSHRGPSLRRFFKKFKPRDHHDKSSSSHQQQQHHHHHHHHYEKQKHFGAGKPAPINSNATNLFAKYGSPGKLLGTGASGSVNLLTSKNDPTKIYAVKKFRARMTNEQESDYKIKVANEFKVGEMLQHENIIKTFELIKDYSNTTKQIIDPDYYIIMEYCQYDFFNLVMSGLMETKEIYCYFKQIINGVAYLHSKGLAHRDLKLDNCVVNKFGILKLIDFGSAVHFRKEIPKGYYITSDDIMLAPNYKLIRARGVVGSDPYLSPEVFEPLGMGYDPRGADVWSIAI…	orf19.6980, Has domain(s) with predicted ATP binding, protein kinase activity, protein tyrosine kinase activity and role in protein phosphorylation	66376.7	9.17	41.21	Unstable
C3_05650W_ST47	C3_05650W_A	chr3A	1263697	1265184	ATGACAACAAACCCTGCTTTGGCGGCTGCTCAAGCATCTCATAATAATATTCCTACAAAGCAAATGAATCATTCAACTTCATCTTCAAACGGTAACGGTAGCAATAATTCATCCGTGGTTGGACTTCACTACAAGATTGGGAAAAAAATTGGTGAAGGTTCTTTTGGTGTCATTTTTGAAGGTACTAATATAATAAATGGAGTACCCGTGGCCATAAAATTTGAACCTAGAAAGACTGAAGCTCCTCAATTACGAGATGAATATAGAACTTATAAACATTTACAAGGATGTGACGGAATTCCTAATGCATATTATTTTGGTCAAGAAGGATTACATAATATTTTAGTCATTGATTTATTGGGTCCTTCTTTAGAAGATTTATTTGATTGGTGTGGTAGA…	ATGACAACAAACCCTGCTTTGGCGGCTGCTCAAGCATCTCATAATAATATTCCTACAAAGCAAATGAATCATTCAACTTCATCTTCAAACGGTAACGGTAGCAATAATTCATCCGTGGTTGGACTTCACTACAAGATTGGGAAAAAAATTGGTGAAGGTTCTTTTGGTGTCATTTTTGAAGGTACTAATATAATAAATGGAGTACCCGTGGCCATAAAATTTGAACCTAGAAAGACTGAAGCTCCTCAATTACGAGATGAATATAGAACTTATAAACATTTACAAGGATGTGACGGAATTCCTAATGCATATTATTTTGGTCAAGAAGGATTACATAATATTTTAGTCATTGATTTATTGGGTCCTTCTTTAGAAGATTTATTTGATTGGTGTGGTAGA…	MTTNPALAAAQASHNNIPTKQMNHSTSSSNGNGSNNSSVVGLHYKIGKKIGEGSFGVIFEGTNIINGVPVAIKFEPRKTEAPQLRDEYRTYKHLQGCDGIPNAYYFGQEGLHNILVIDLLGPSLEDLFDWCGRRFSVKTVVQVAIQMLTLVEEVHRHDLIYRDIKPDNFLIGRRGATDENNVHLIDFGMAKQYRDPRTKQHIPYREKKSLSGTARYMSINTHLGREQSRRDDLEALGHVFFYFLRGQLPWQGLKAPTNKQKYEKIGDKKRTTPAVTLCDGLPQQFAEYLDSVRSLPFDAEPPYEEYRMLLLSVLDDLGQACDGDMDWMHLNGGRGWDATINKKPNLHGYGHPNPPNERERRHRDQRRTRQHQQSQQVQQQQLQAQAQAQQLQQLQQAQQ…	YCK2, Plasma membrane protein similar to S. cerevisiae casein kinase I, Yck2p; null mutant has defect in damaging oral epithelial cells and in hyphal branching; transcription is activated in weak acid stress or on contact with host cells	56459.2	8.37	57.97	Unstable
C3_06070C_ST48	C3_06070C_A	chr3A	1378291	1379928	ATGGTTGAAGATAAAGATATAGACTTGAATATTAATAATTTGAAAATTCACGATGCGCCAACACGAACACCACCGGTAAGCCTGCCACCAGCTTTACCAACACCACCAACTCCCTCAGGGATTCTGCTCAACACTACAATGCAAGCTAAATTGATGGCCTTTCAACAACAAAGATCGAAAGCAGCAGCAGCAGCAGCAGCAGCAGCTTCAGTTTCATCATCATCATCAGGTACGCAGGCGTCATCGTCATCTATATCAGCTTCAACATCGGAATCGAGTGTATCAACAATACCAGCAAATATTAACCGAACTGTATCGGGTAAAAAGAAACCCAAACCAAACTTGAAATTAAGTGATTTACCATTGTCACGTAATAATAGTTTACACCGTTCTAACACT…	ATGGTTGAAGATAAAGATATAGACTTGAATATTAATAATTTGAAAATTCACGATGCGCCAACACGAACACCACCGGTAAGCCTGCCACCAGCTTTACCAACACCACCAACTCCCTCAGGGATTCTGCTCAACACTACAATGCAAGCTAAATTGATGGCCTTTCAACAACAAAGATCGAAAGCAGCAGCAGCAGCAGCAGCAGCAGCTTCAGTTTCATCATCATCATCAGGTACGCAGGCGTCATCGTCATCTATATCAGCTTCAACATCGGAATCGAGTGTATCAACAATACCAGCAAATATTAACCGAACTGTATCGGGTAAAAAGAAACCCAAACCAAACTTGAAATTAAGTGATTTACCATTGTCACGTAATAATAGTTTACACCGTTCTAACACT…	MVEDKDIDLNINNLKIHDAPTRTPPVSSPPALPTPPTPSGISLNTTMQAKLMAFQQQRSKAAAAAAAAASVSSSSSGTQASSSSISASTSESSVSTIPANINRTVSGKKKPKPNLKLSDLPLSRNNSLHRSNTSASDSSVTTPEADTPTGKISNEPQPQGLFANYSDYVDIKSGQLNFAGKASLHSKGIDFSSGSSFRVSLDEFEYLEELGRGNYGSVSKVLHKPTGVLMAMKEVRLELDENKFTQILMELDILHKCDSPYIVDFYGAFFVEGAVYMCIEYMDGGSLDRIFGNDVGVKDEYELAYITESVILGLKELKDKHNIIHRDVKPTNILVNTQGKVKLCDFGVSGNLVASLAKTNIGCQSYMAPERINTMRPDDATYSVQSDVWSLGLTILELA…	PBS2, MAPK kinase (MAPKK); role in osmotic and oxidative stress responses, oxidative stress adaptation; required for stress regulation of Hog1p localization and activity; functional homolog of S. cerevisiae Pbs2p	59347.7	8.51	45	Unstable
C3_06620W_ST49	C3_06620W_A	chr3A	1510901	1514872	ATGACTTCAAACCGGCCGCCACCACCATCACTCCTGTTTTTCATAGAAGACAATCCCACTGCACAACAACCACAGGAACACCATCAGCAATCCCTTTTAAATCCTAATGCATCTGCAAATCGTCCACCAATAAAATGTACTACTACTAATTCTAGATTTAATCTGCAATCACAATTGCGATATGAGTCAAATGCCCGGCCAAATCGTTCTTCTCCCTTGTTTACGTCATCCCCCACTTTTGCCAACTATAATAATAAACCTCCTACCCCCAGTGCCAATGGCGATGACAATGGTAATAGCGATATTGAGGATATATTAAAGTTTCCTATAGAGTCATCCCATGCATATTCATATGCTCATTTATCACCAAACTCTTTAGCATTGAGATTAAATGTGTTG…	ATGACTTCAAACCGGCCGCCACCACCATCACTCCTGTTTTTCATAGAAGACAATCCCACTGCACAACAACCACAGGAACACCATCAGCAATCCCTTTTAAATCCTAATGCATCTGCAAATCGTCCACCAATAAAATGTACTACTACTAATTCTAGATTTAATCTGCAATCACAATTGCGATATGAGTCAAATGCCCGGCCAAATCGTTCTTCTCCCTTGTTTACGTCATCCCCCACTTTTGCCAACTATAATAATAAACCTCCTACCCCCAGTGCCAATGGCGATGACAATGGTAATAGCGATATTGAGGATATATTAAAGTTTCCTATAGAGTCATCCCATGCATATTCATATGCTCATTTATCACCAAACTCTTTAGCATTGAGATTAAATGTGTTG…	MTSNRPPPPSLSFFIEDNPTAQQPQEHHQQSLLNPNASANRPPIKCTTTNSRFNSQSQLRYESNARPNRSSPLFTSSPTFANYNNKPPTPSANGDDNGNSDIEDILKFPIESSHAYSYAHLSPNSLALRLNVLKRSLEILKDRPELFKSLTTTNSATNSPVQSSAPPTATSINISIDEASPLFRSASHPVEIDTNMSTEDLSLQPPPLRKTLYMQTNHSSDYIHDVSGASSLSANEHKNYKLRSNASSAALAALFRPTMKRSDSLPLNNNTSIPVTGRRVSTPPLVRELPTSRKTSSSKNKNDDFKDIIDLLENDLSALLDNSEVATTLHDLSLSTPDNLDDTNSNHDILKHKLLHALAMPFIENSVQPTSLLEFDGTSDPSLNSSHVRPSTTALNLLN…	FUN31, Putative PAS kinase involved in cell wall damage response; similar to S. cerevisiae Psk1p, a putative serine/threonine protein kinase; induced by Mnl1 under weak acid stress; rat catheter and Spider biofilm induced	149210	5.53	48.86	Unstable
C4_03120C_ST50	C4_03120C_A	chr4A	654505	657207	ATGGTGATACAGAAACTGCCACAAACTGCTAATATTCAACTACTAGAGCAGCAAAAGGAAAATATTCAGCCATTGAGTGGAGGAAGGTCTGCTACTAAATTAACGAAAGCATTGTCATCGAGACCCAATTCGGCTACATCAATAAATTATCAAGAGCATAGAACAAAATTAGAAAGAGAAAGAGAAGAGTTGGAACAAAAGCTTTTAGATTCCGATGAATTGGATGATCCATTACAGGTTTATATTGAATATATCAACTGGGTCCATTATAATTTTCCTCAGGGTGCCAATGCTGATAGTGGTTTGGTGATATTATTGGAGAAATGTACTTCGAAATTCAGAGACGTGCTGCATTACAAAAATGATCCAAGATATTTGAAAATATGGCTAGAGTATACT…	ATGGTGATACAGAAACTGCCACAAACTGCTAATATTCAACTACTAGAGCAGCAAAAGGAAAATATTCAGCCATTGAGTGGAGGAAGGTCTGCTACTAAATTAACGAAAGCATTGTCATCGAGACCCAATTCGGCTACATCAATAAATTATCAAGAGCATAGAACAAAATTAGAAAGAGAAAGAGAAGAGTTGGAACAAAAGCTTTTAGATTCCGATGAATTGGATGATCCATTACAGGTTTATATTGAATATATCAACTGGGTCCATTATAATTTTCCTCAGGGTGCCAATGCTGATAGTGGTTTGGTGATATTATTGGAGAAATGTACTTCGAAATTCAGAGACGTGCTGCATTACAAAAATGATCCAAGATATTTGAAAATATGGCTAGAGTATACT…	MVIQKSPQTANIQLLEQQKENIQPLSGGRSATKLTKALSSRPNSATSINYQEHRTKLEREREELEQKLLDSDELDDPLQVYIEYINWVHYNFPQGANADSGLVILLEKCTSKFRDVSHYKNDPRYLKIWLEYTNYSDSPRDIYVYLAKKEIGNQLALYYEEFARYLEAQKKYTDANQIYELGIQSNAFPLKRLQKSYENFKERLQLEMSSVSTTSDLVREALKVKRGSSVEPGAHVDHGPIAKKPRLEVFKDDDDQNQSVLHLIFGASLNDDIKLNSTKQRIKENTISATAWKGRVLKQKVPTPPNSSGGKIQVFRDFEPLAFQAKKSICYDEKGRAYTLIENPGKKSERVLVNMDLIYPDESQEFSMLELLAISRRSERQKQQKQTLINHPTVVDEDT…	BUB1, Putative cell cycle checkpoint kinase; mutation confers increased sensitivity to nocodazole	103363	5.63	37.34	Stable
C4_04450C_ST51	C4_04450C_A	chr4A	951265	953769	ATGATACCTCAGTCGAACCCTACAGCTCAAAGACGTTCAGGTGATGCCCAAAATACCAATAATGTGGCACCTAACTCAGTAGCCACCACCACTGACACTGCTTTGACAGCTTCCACACAATCTGGAAGCAGCAGCAATAATGCGAATAAAAAATTGGAGTATATAGGTGTCTACAAGATTGGTCCAGAAATTGGTAAAGGGTCATTTGCCACGGTTTATAAATGTATCGATACAACCAATAATAAAGCTGTGGCTATCAAGTCCGTGTATCGGTCCAAATTAAAATCGAAAAAACTACTAGAAAACTTAGAAATTGAAATCCAGATATTGAAATCAATGAAACATCCTCACATAGTGGGTCTATTAGATTATAAGCAAACAACAAGCTACTTCCATCTA…	ATGATACCTCAGTCGAACCCTACAGCTCAAAGACGTTCAGGTGATGCCCAAAATACCAATAATGTGGCACCTAACTCAGTAGCCACCACCACTGACACTGCTTTGACAGCTTCCACACAATCTGGAAGCAGCAGCAATAATGCGAATAAAAAATTGGAGTATATAGGTGTCTACAAGATTGGTCCAGAAATTGGTAAAGGGTCATTTGCCACGGTTTATAAATGTATCGATACAACCAATAATAAAGCTGTGGCTATCAAGTCCGTGTATCGGTCCAAATTAAAATCGAAAAAACTACTAGAAAACTTAGAAATTGAAATCCAGATATTGAAATCAATGAAACATCCTCACATAGTGGGTCTATTAGATTATAAGCAAACAACAAGCTACTTCCATCTA…	MIPQSNPTAQRRSGDAQNTNNVAPNSVATTTDTALTASTQSGSSSNNANKKLEYIGVYKIGPEIGKGSFATVYKCIDTTNNKAVAIKSVYRSKLKSKKLLENLEIEIQILKSMKHPHIVGLLDYKQTTSYFHLVMDYCSMGDLSYFIRRRNNLVKSHPVISSLLHCYPSPEGSHGLNEVLVLHFLRQLSSALQFLRDKSLVHRDIKPQNLLLCPPVHSKQEFIDGEFVGMWELPILKIADFGFARFLPSTSMAETLCGSPLYMAPEILRYEKYNAKADLWSVGAVLYEMTVGKPPFKAGNHIELLKNIEKANDKIKFPSAAQVPEPLKQLIRSLLKYNPTERISFNEFFNDSLITCDLDDNDQPLETSQMDENLFISEYISPIAPAERSQFFKEQKKND…	ATG1, Putative protein serine/threonine kinase; predicted role in vesicle formation in autophagy and the cytoplasm-to-vacuole targeting (Cvt) pathway; Spider biofilm induced	92906.4	5.75	47.81	Unstable
C4_04460C_ST52	C4_04460C_A	chr4A	954686	958912	ATGTCTACATCTCTACTGCACCAAGAGTTGTCGACTGAAAAGGGGCAATCATGTCCTCCAATACCAGATAGCAATCCTTTAAATCCAAAGTCACCTGCATTAAGAACCACCAGCAATTCTACAATTCTAAATAGTCCCATTGAAACTATCAATGTAAATACATCATCAAAAAGCAACATATCCGGCGAATCAACCATTAATGGCTCAGCATATTCAAACTCCACTACAGTAGTTCAGCCTGAGGTGTTCGGCGAAGCGCACACGACAACTTCAACCCACAATTCCGCAAGTACCAGAACAGAGAGGAACGAATTTCCGAATAGCCACCTACACCAACACCAACAAGAGAGTAGGAACAATGGTGAAAGTAATACTCCTATGACTTCCCCGAAACATTTC…	ATGTCTACATCTCTACTGCACCAAGAGTTGTCGACTGAAAAGGGGCAATCATGTCCTCCAATACCAGATAGCAATCCTTTAAATCCAAAGTCACCTGCATTAAGAACCACCAGCAATTCTACAATTCTAAATAGTCCCATTGAAACTATCAATGTAAATACATCATCAAAAAGCAACATATCCGGCGAATCAACCATTAATGGCTCAGCATATTCAAACTCCACTACAGTAGTTCAGCCTGAGGTGTTCGGCGAAGCGCACACGACAACTTCAACCCACAATTCCGCAAGTACCAGAACAGAGAGGAACGAATTTCCGAATAGCCACCTACACCAACACCAACAAGAGAGTAGGAACAATGGTGAAAGTAATACTCCTATGACTTCCCCGAAACATTTC…	MSTSLSHQELSTEKGQSCPPIPDSNPLNPKSPALRTTSNSTILNSPIETINVNTSSKSNISGESTINGSAYSNSTTVVQPEVFGEAHTTTSTHNSASTRTERNEFPNSHLHQHQQESRNNGESNTPMTSPKHFPTDDLRHSLFYKAGSAAHHKSATSSKQSSTTSLKDGLNNANTYHFQNTFLDNNVMSDLEESPVPNERNPIQDTGLGPRSHATKFGVQSTTSLPTTISQSRLPNSNKSSFFPFKSYTSSPVKETKHVFLEYDPITRRKVLNTYEILREIGKGEHGKVKLARDLINNELVAIKIVNRKSRKERPSLRMRKNSSAPVINEYELKVKREIAIMKKCRHKHIVALREVLDDLNSLKIYLVLEYMEKGEIKWKKLQSDVAKPTANKCYDAND…	orf19.3840, Putative serine/threonine kinase similar to S. cerevisiae Sak1; possibly an essential gene, disruptants not obtained by UAU1 method; Spider biofilm induced	155934	6.03	50.25	Unstable
C4_05030C_ST53	C4_05030C_A	chr4A	1071853	1076304	ATGTCAGATATTCCTCCAACCAATGAATCTAATCTGGATTCTACTTTGATTAATCAAAAAAATAATGACAATAATGACAATAAAGAGACTGGTAAAGATATAAGTTCAACTCATACCCATCATAGAGTCACGTTTGCGGAACAACAACCAATTTCCACCTCAAGCAGGAAGTCTTCACTTTTAAGAAAACATTCCCTGAATAATACATCTTCAGACAGTGATAAACGACCATCTATTATATCGAGAAATAGTAATCCGGACATTCATAGAGATTCTTTACCTCCTCTTAATCGAGGACCAAGCTACAACGGTAATTATACAAGAAGTCATAGTTCAAGAAATGTTAATGCCAACAACACCATCAATACTGGTGTTACTTCCGATAGTAACTCTAATAAC…	ATGTCAGATATTCCTCCAACCAATGAATCTAATCTGGATTCTACTTTGATTAATCAAAAAAATAATGACAATAATGACAATAAAGAGACTGGTAAAGATATAAGTTCAACTCATACCCATCATAGAGTCACGTTTGCGGAACAACAACCAATTTCCACCTCAAGCAGGAAGTCTTCACTTTTAAGAAAACATTCCCTGAATAATACATCTTCAGACAGTGATAAACGACCATCTATTATATCGAGAAATAGTAATCCGGACATTCATAGAGATTCTTTACCTCCTCTTAATCGAGGACCAAGCTACAACGGTAATTATACAAGAAGTCATAGTTCAAGAAATGTTAATGCCAACAACACCATCAATACTGGTGTTACTTCCGATAGTAACTCTAATAAC…	MSDIPPTNESNSDSTLINQNNNGNNDNKETGKDISSTHTHHRVTFAEQQPISTSSRKSSLLRKHSSNNTSSDSDKRPSIISRNSNPDIHRDSLPPLNRGPSYNGNYTRSHSSRNVNANNTINTGVTSDSNSNNNVDSNAPISSPATPAISSPPANSKYFNLTLPAGKSREKSPGRHSKEGHTRSRSFTKQQHGIGSTSSQSSSQYLAQEKAYLRKMRNQSVDDYYSKGIPGAHEVSKADDNDDEDDDDDEEHSSFDGGDNANLLAAIDDDKYQIDYSMALSLMKNSNVNLRKIANLNTDDTDDPAIIERLEWQSMLTSVLTGDVVRSEKTKIININNPDSTQESYLHATFKENLWFGIRAKIFNRTEDEQRKIVAYRRTLVDQLIDDVMKFEIDYENST…	SSK2, MAP kinase kinase kinase (MAPKKK); regulates Hog1 activation and signaling; repressed by ciclopirox olamine	168109	5.65	45.96	Unstable
C4_06480C_MAPK02	C4_06480C_A	chr4A	1437628	1438893	ATGAATATAGATCAACATCATCAGCTTCAACAGCAACATCAACAACAAATGTTACAACAACAAGCTCAGGCTCAGGCTCAGGCTCAAGCTCAAGCACAACAACAACAACAACAACAACAACAGGCAGCAGCCGCAGCCGCAGCAGCTAACGCTGCAGCTACTACTTCTTCTTCCCCTCGTCAAGTTTCATTCAACGTATCTGATCATTATCAAATATTAGAAATTGTTGGAGAAGGAGCATATGGAATAGTTTGTTCAGCCATTCATAAACCATCACAACAAAAAGTTGCCATTAAAAAAATTGAACCATTTGAAAGAAGTATGTTATGTTTACGTACATTACGAGAATTAAAATTATTAAAACATTTTAATCATGAAAATATCATTAGTATATTAGCT…	ATGAATATAGATCAACATCATCAGCTTCAACAGCAACATCAACAACAAATGTTACAACAACAAGCTCAGGCTCAGGCTCAGGCTCAAGCTCAAGCACAACAACAACAACAACAACAACAACAGGCAGCAGCCGCAGCCGCAGCAGCTAACGCTGCAGCTACTACTTCTTCTTCCCCTCGTCAAGTTTCATTCAACGTATCTGATCATTATCAAATATTAGAAATTGTTGGAGAAGGAGCATATGGAATAGTTTGTTCAGCCATTCATAAACCATCACAACAAAAAGTTGCCATTAAAAAAATTGAACCATTTGAAAGAAGTATGTTATGTTTACGTACATTACGAGAATTAAAATTATTAAAACATTTTAATCATGAAAATATCATTAGTATATTAGCT…	MNIDQHHQLQQQHQQQMLQQQAQAQAQAQAQAQQQQQQQQQAAAAAAAANAAATTSSSSPRQVSFNVSDHYQILEIVGEGAYGIVCSAIHKPSQQKVAIKKIEPFERSMLCLRTLRELKLLKHFNHENIISILAIQRPINYESFNEIYLIQELMETDLHRVIRTQNLSDDHIQYFIYQTLRALKAMHSANVLHRDLKPSNLLLNSNCDLKICDFGLARSIASQEDNYGFMTEYVATRWYRAPEIMLTFQEYTTAIDVWSVGCILAEMLSGRPLFPGRDYHNQLWLIMEVLGTPNMEDYYNIKSKRAREYIRSLPFCKKIPFSELFANTNNNTSTSTSNTGGRTNINPLALDLLEKLLIFNPAKRITVEDALKHPYLQLYHDPNDEPISDKIPEDFFDFD…	CEK1, ERK-family protein kinase; required for wild-type yeast-hypha switch, mating efficiency, virulence in mice; Cst20-Hst7-Cek1-Cph1 MAPK pathway regulates mating, and invasive hyphal growth under some conditions; Spider biofilm induced	48621.7	6.07	51.23	Unstable
C5_01320W_ST54	C5_01320W_A	chr5A	294646	296502	ATGTCAGAGCAAGCCCAAACTCAGGTCTCTGCTGATCAACAGCAACACCAACATAATCACCACCACCATCATCATCATCACCATCATAATGAAAATCAATCGCAACAGCAAGTTCCGATCGACCCCGCTGCAAATCCAGCAAATAGAATAGGGCGGTATCAAATTCTCAAGACATTAGGTGAAGGGTCATTTGGTAAAGTGAAATTGGCTCAACACTTGGGCACAGGTCAAAAAGTTGCTTTGAAAATCATTAATCGTAAAACATTAGCCAAGTCTGACATGCAGGGTCGTGTTGAAAGAGAGATTTCATATTTAAGATTATTGAGACACCCACATATCATTAAATTATACGATGTCATAAAATCCAAAGATGAAATCATTATGGTTATTGAATTTGCC…	ATGTCAGAGCAAGCCCAAACTCAGGTCTCTGCTGATCAACAGCAACACCAACATAATCACCACCACCATCATCATCATCACCATCATAATGAAAATCAATCGCAACAGCAAGTTCCGATCGACCCCGCTGCAAATCCAGCAAATAGAATAGGGCGGTATCAAATTCTCAAGACATTAGGTGAAGGGTCATTTGGTAAAGTGAAATTGGCTCAACACTTGGGCACAGGTCAAAAAGTTGCTTTGAAAATCATTAATCGTAAAACATTAGCCAAGTCTGACATGCAGGGTCGTGTTGAAAGAGAGATTTCATATTTAAGATTATTGAGACACCCACATATCATTAAATTATACGATGTCATAAAATCCAAAGATGAAATCATTATGGTTATTGAATTTGCC…	MSEQAQTQVSADQQQHQHNHHHHHHHHHHNENQSQQQVPIDPAANPANRIGRYQILKTLGEGSFGKVKLAQHLGTGQKVALKIINRKTLAKSDMQGRVEREISYLRLLRHPHIIKLYDVIKSKDEIIMVIEFAGKELFDYIVQRGKMPEDEARRFFQQIIAAVEYCHRHKIVHRDLKPENLLLDDQLNVKIADFGLSNIMTDGNFLKTSCGSPNYAAPEVISGKLYAGPEVDVWSAGVILYVMLCGRLPFDDEFIPALFKKISNGVYTLPNYLSAGAKHLLTRMLVVNPLNRITIHEIMEDEWFKQDMPDYLLPPDLSKNKNSKIDVDEDVIRALSVTMGYDRDEIVNVIEKANKQVAAGNSSSQQSKSSNEILDAYLLMKENHALVKDLKKSKSENIE…	SNF1, Essential protein; functional homolog of S. cerevisiae Snf1p regulator of sugar metabolism; constitutively expressed; Thr208 phosphorylation may have regulatory role; up-regulation associated with azole resistance; has polyhistidine tract	69760.6	6.72	51.73	Unstable
C5_01765C_PI3K03	C5_01765C_B	chr5B	396435	399368	ATGTCTGCAGATATAACTGAAACCCCAAATAAACAACTTTTGGAGCAGATTCGGTCTCCACTGTTTAGTTTATTCAATTGCATTTATGAGTTAAAAAACCATACTGATAGCATTGGGATTCAACATGAGCTTGTCAAAAAGTTATATTCCTTCCCATATGAAGATTTGCAATTTTTCATTCCCCAATTTGTTCAATTATTGGTTACATACGATAGTGAATCAATGGCTCTTGAAGAATTCATAATTACATATAGTTCTAGGTACCCTCATTTCAGTTTAATTGTATTTTGGAACTTGCAGGCTTACATTTTTGAATTGAAAAACGAACCAGAATCTCGATCATTCCAAGCCGTTAGAAACTTAATCACTAAAATCCAGAACATTATGTTTAATGCAGAT…	ATGTCTGCAGATATAACTGAAACCCCAAATAAACAACTTTTGGAGCAGATTCGGTCTCCACTGTTTAGTTTATTCAATTGCATTTATGAGTTAAAAAACCATACTGATAGCATTGGGATTCAACATGAGCTTGTCAAAAAGTTATATTCCTTCCCATATGAAGATTTGCAATTTTTCATTCCCCAATTTGTTCAATTATTGGTTACATACGATAGTGAATCAATGGCTCTTGAAGAATTCATAATTACATATAGTTCTAGGTACCCTCATTTCAGTTTAATTGTATTTTGGAACTTGCAGGCTTACATTTTTGAATTGAAAAACGAACCAGAATCTCGATCATTCCAAGCCGTTAGAAACTTAATCACTAAAATCCAGAACATTATGTTTAATGCAGAT…	MSADITETPNKQLLEQIRSPSFSLFNCIYELKNHTDSIGIQHELVKKLYSFPYEDLQFFIPQFVQLLVTYDSESMALEEFIITYSSRYPHFSLIVFWNLQAYIFELKNEPESRSFQAVRNLITKIQNIMFNADQQTVKAPEFRENFLPALVLCGAVASSVLLPSFKSYCLPMIKAQGKQQKSLVFKLVNFQKSLTKNLTLKNQRMSADIPKGSHSDDETATSSSIKPSLSRSASVPRRNTKKTSLSFSSDESEAYTTDDDDNKTSIELEKDFYKIDLDGLSKEKSANFLEPEENLNVNTAIKSKKRLSTLTSKVMTQPWNGIDGYNVNSQSLPDLSKAEGRDLIPFISSTESETSLLYHNNSISNDLQKNIPRQQKFSPGFDNVYLTKLLQVNYAKNET…	PIKALPHA, Putative phosphatidylinositol kinase; non-sex gene located within the MTLalpha mating-type-like locus	110694	5.77	43.69	Unstable
C5_02340C_ST55	C5_02340C_A	chr5A	517861	521547	ATGAGCATACTTTCAGAGAACAATCCTACACAAACATCAATAACAGATCCAAATGAGTCTTCTCATCTACACAACCCAGAGTTAAACTCTGGAACGAGGGTTGCTTCTGGACCTGGACCTGGACCTGAAGTTGAATCAACACCACTAGCACCCCCAACTGAGGTCATGAATACTACATCAGCTAATACTTCTTCATTAAGTTTAGGGTCTCCAATGCACGAGAAAATAAAACAATTTGATCAAGACGAGGTTGACACTGGGGAAACTAATGATAGGACTATAGAATCTGGATCTAGTGATATTGATGATTCACAACAATCACATAACAATAACAACAACAACAACAACAACGAGAGCAATCCAGAATCAAGTGAAGCCGATGATGAAAAAACCCAAGGA…	ATGAGCATACTTTCAGAGAACAATCCTACACAAACATCAATAACAGATCCAAATGAGTCTTCTCATCTACACAACCCAGAGTTAAACTCTGGAACGAGGGTTGCTTCTGGACCTGGACCTGGACCTGAAGTTGAATCAACACCACTAGCACCCCCAACTGAGGTCATGAATACTACATCAGCTAATACTTCTTCATTAAGTTTAGGGTCTCCAATGCACGAGAAAATAAAACAATTTGATCAAGACGAGGTTGACACTGGGGAAACTAATGATAGGACTATAGAATCTGGATCTAGTGATATTGATGATTCACAACAATCACATAACAATAACAACAACAACAACAACAACGAGAGCAATCCAGAATCAAGTGAAGCCGATGATGAAAAAACCCAAGGA…	MSILSENNPTQTSITDPNESSHLHNPELNSGTRVASGPGPGPEVESTPLAPPTEVMNTTSANTSSLSLGSPMHEKIKQFDQDEVDTGETNDRTIESGSSDIDDSQQSHNNNNNNNNNESNPESSEADDEKTQGMPPRMPGTFNVKGLHQGDDSDNEKQYTELTKSINKRTSKDSYSPGTLESPGTLNALETNNVSPAVIEEEQHTSSLEDLSLSLQHQNENARLSAPRSAPPQVSTSKTSSFHDMSSVISSSTSVHKIPSNPTSTRGSHLSSYKSTLDPGKPAQAAAPPPPEIDIDNLLTKSELDSETDTLSSATNSPNLLRNDTLQGIPTRDDENIDDSPRQLSQNTSATSRNTSGTSTSTVVKNSRSGTSKLTSTSTAHNQTAAITPIIPSHNKFHQ…	CST20, Protein kinase of Ste20p/p65PAK family, required for wild-type mating efficiency and virulence in a mouse model; Cst20p-Hst7p-Cek1p-Cph1p MAPK pathway regulates some hyphal growth; involved in Cdc42p growth regulation	132767	6.58	57.08	Unstable
C5_02440C_TK01	C5_02440C_A	chr5A	537707	538597	ATGACAGATCACCTAATTGCTAAAGTACAAGAACATGTACCTAACATTCCATTGAAAATAATATCACAAGGTGCAGAAGCACTAGTTTTTGAAACATCAGTTCACCCGTACTACAACTACAATTCGAGTGAAAAACACCATGAGTCACCTTCTTTGCACAATCATACAACATTTATAATAAAATATCGTCCCACGAAACCCTATCGTCACCCTAAAATAGATTTGCAAATTAATAAATCACGAACTATTGGCGAAGTTAAGTTTATGTATAAACTCTCAAAATTAAACATTGCCTGTCCTAATATCATTCTGACAGATTTTAATAACGGTATCATATGGATGGAATGTCTTGGATCAAAATTGCCCAATGGCACAATAAGTTCATTTAAGAATTGGTTA…	ATGACAGATCACCTAATTGCTAAAGTACAAGAACATGTACCTAACATTCCATTGAAAATAATATCACAAGGTGCAGAAGCACTAGTTTTTGAAACATCAGTTCACCCGTACTACAACTACAATTCGAGTGAAAAACACCATGAGTCACCTTCTTTGCACAATCATACAACATTTATAATAAAATATCGTCCCACGAAACCCTATCGTCACCCTAAAATAGATTTGCAAATTAATAAATCACGAACTATTGGCGAAGTTAAGTTTATGTATAAACTCTCAAAATTAAACATTGCCTGTCCTAATATCATTCTGACAGATTTTAATAACGGTATCATATGGATGGAATGTCTTGGATCAAAATTGCCCAATGGCACAATAAGTTCATTTAAGAATTGGTTA…	MTDHLIAKVQEHVPNIPLKIISQGAEALVFETSVHPYYNYNSSEKHHESPSLHNHTTFIIKYRPTKPYRHPKIDLQINKSRTIGEVKFMYKLSKLNIACPNIISTDFNNGIIWMECLGSKLPNGTISSFKNWLWYLESQEKEDPSINLHDDDQVELVCQKVGQLIGRLHLNDMIHGDLTSSNIILTEVDTKKNEDTDANNSSVYFEPALIDFGLSSFSGLAEDKAVDLYVLERAILSTHSNYADKLNGWLLEGYQQIHDSIEFNKTKQQLGKSKLKDTIKRLEDVRLRGRKRSMLG	orf19.4252, Ortholog(s)have protein serine/threonine kinase activity	33881.3	6.5	42.28	Unstable
C5_02840C_ST56	C5_02840C_A	chr5A	631817	636205	ATGTCAACAGTTGTTAATAGACGGTCATCACATCAGTTTGACTCTCCGAGTAATCATTTGGATCATTCATCTTCGATGAATGTGGATAAGGTGGTTCAATCAGTTACAAATGCCACTAAGCGTCTATCACAAATATCTACCAACACCAATAACTCCAATAAGAAAAGAAAAACCCAAAATAAAATTGGACCTTGGAAATTAGGTAGAACTTTGGGTAGAGGTTCTACTGGTAGAGTGAGGTTAGCCAAAAACACTACTACAGGTCAATTAGCCGCTGTCAAAATTGTTCCTAAATCAAATTTCAAGAAATTAGAAAATCCAAAATATAAACGCTCTAAAGAAGATGCTACAAGATTACCATATGGTATTGAACGTGAAATCATTATTATGAAATTAATA…	ATGTCAACAGTTGTTAATAGACGGTCATCACATCAGTTTGACTCTCCGAGTAATCATTTGGATCATTCATCTTCGATGAATGTGGATAAGGTGGTTCAATCAGTTACAAATGCCACTAAGCGTCTATCACAAATATCTACCAACACCAATAACTCCAATAAGAAAAGAAAAACCCAAAATAAAATTGGACCTTGGAAATTAGGTAGAACTTTGGGTAGAGGTTCTACTGGTAGAGTGAGGTTAGCCAAAAACACTACTACAGGTCAATTAGCCGCTGTCAAAATTGTTCCTAAATCAAATTTCAAGAAATTAGAAAATCCAAAATATAAACGCTCTAAAGAAGATGCTACAAGATTACCATATGGTATTGAACGTGAAATCATTATTATGAAATTAATA…	MSTVVNRRSSHQFDSPSNHLDHSSSMNVDKVVQSVTNATKRLSQISTNTNNSNKKRKTQNKIGPWKLGRTLGRGSTGRVRLAKNTTTGQLAAVKIVPKSNFKKLENPKYKRSKEDATRLPYGIEREIIIMKLISHPNIMGLYDVWENKNDLYLILEYIEGGELFDYLIKRGKLQEYEAINYFKQIINGINYLHQFNICHRDLKPENLLLDFNKNIKIADFGMAALEVKEKLLETSCGSPHYASPEIVAGKNYHGAPSDIWSCGIILFALLTGHLPFDDENIRKLLLKVQSGKFNMPPELSFEAKDLITKMLKVNPRERITIDAILTHPLLAKYPEPTVSYSSTTTLDINSINIKQIESVDKIDKEILKNLSVLFHNCDEKTIISRLLSPNRCPEKMFYY…	HSL1, Probable protein kinase involved in determination of morphology during the cell cycle of both yeast-form and hyphal cells via regulation of Swe1p and Cdc28p; required for full virulence and kidney colonization in mouse systemic infection	163668	9.15	53.04	Unstable
C5_03150W_ST57	C5_03150W_A	chr5A	709951	711870	ATGACAACCAAACTGCGAAACCAACCATTATCATTAAATACAAACCAATCAGGTACTGGCGCTGGCACTAGTACTGATTCAATACCTGCAGGTTCACATATCACTGACACTAATCAGTCCTTTTTATTACCAGGCTTAGCATCTCCACCAACTATTTCAAACACTGCCATGTTTCAAAATCCAGCACCACATACTATCAGAAAAATGGATTTAAGTATAGAAGTACCACCACATCAACTTGAGAATAATGAACAAAATACCACTCCTATCGATATCAACATGAACATGCTCAAACATTATGAAATATTACAACTCCCAACACCAATTTTCAACACGGGGTCATTTGCTAATTATAACCAACCATTGTCATCATTATCATCTAACTCTTCAAATGCATCA…	ATGACAACCAAACTGCGAAACCAACCATTATCATTAAATACAAACCAATCAGGTACTGGCGCTGGCACTAGTACTGATTCAATACCTGCAGGTTCACATATCACTGACACTAATCAGTCCTTTTTATTACCAGGCTTAGCATCTCCACCAACTATTTCAAACACTGCCATGTTTCAAAATCCAGCACCACATACTATCAGAAAAATGGATTTAAGTATAGAAGTACCACCACATCAACTTGAGAATAATGAACAAAATACCACTCCTATCGATATCAACATGAACATGCTCAAACATTATGAAATATTACAACTCCCAACACCAATTTTCAACACGGGGTCATTTGCTAATTATAACCAACCATTGTCATCATTATCATCTAACTCTTCAAATGCATCA…	MTTKSRNQPLSLNTNQSGTGAGTSTDSIPAGSHITDTNQSFLLPGLASPPTISNTAMFQNPAPHTIRKMDLSIEVPPHQLENNEQNTTPIDINMNMLKHYEILQLPTPIFNTGSFANYNQPLSSLSSNSSNASISMSPPTFRSISRVCSLKQPKRYVSEPIPISTSTSENKVTTSPITPSSSPPTLQQEEIAKKEKQKIFYSKRLGLSFNFVEEIGKGNFSHVILAKTNIYNSDNNGNSVNNNTNDNQEVVDLAVAVKIISVPMESKQQVHNFKSFIRRELNILYHISHHPCITSLIDYDISLDIPIEQIESDVIIDDDELYQKTPPQNLSMNPHSDVGKSSSPDQFIFMNYCNGGNLLHFLQKNNSKHHYLHNHHHHHHHHNHQQGHHDTIQYWQFLK…	PRR1, orf19.4347, Putative serine/threonine protein kinase; Hog1p-induced	72404.1	6.49	49.94	Unstable
C5_04060C_PI3K04	C5_04060C_A	chr5A	902120	909097	ATGACGTCGAATCAATCAATAAGTACTACTGAACTACTACAGTTTTTAACAGATATAGAAACCAATATCGACGATCATGAAACCGATTTTAGAAAATTGCTACTCTATTTACTACGATTCACTAATGAAAAATTAATTGTCATTGCACAAGAAGAAAACAAAACGCCAACTGAACTACAGTTATTGTCCAAATTAATCGACACCATTGAGTTGGTGCTATCAAAGAAAACACCCTTACTTTCAACTTTATTAACTATTGAAGACGTCAATATAATTCATACTACAGGTTCGGGATCATTAGTGTATGAGGTCCCCTTACATGAATGGTGTATATCCTTTGCCTTACTGCATATTCCTAATTTTGTTTCCCATACTGCTGGATTAAATCAACTAAAACGA…	ATGACGTCGAATCAATCAATAAGTACTACTGAACTACTACAGTTTTTAACAGATATAGAAACCAATATCGACGATCATGAAACCGATTTTAGAAAATTGCTACTCTATTTACTACGATTCACTAATGAAAAATTAATTGTCATTGCACAAGAAGAAAACAAAACGCCAACTGAACTACAGTTATTGTCCAAATTAATCGACACCATTGAGTTGGTGCTATCAAAGAAAACACCCTTACTTTCAACTTTATTAACTATTGAAGACGTCAATATAATTCATACTACAGGTTCGGGATCATTAGTGTATGAGGTCCCCTTACATGAATGGTGTATATCCTTTGCCTTACTGCATATTCCTAATTTTGTTTCCCATACTGCTGGATTAAATCAACTAAAACGA…	MTSNQSISTTELLQFLTDIETNIDDHETDFRKLLLYLLRFTNEKLIVIAQEENKTPTELQLLSKLIDTIELVLSKKTPLLSTLLTIEDVNIIHTTGSGSLVYEVPLHEWCISFALSHIPNFVSHTAGLNQLKRLVFLIVNLVSTQLHSFKVIKSTRIHLLKTLDDNLNFCLQNLLSANTFLFKSKLTTAVNLFSIVHDYDISQKLSLNLNNYQLKFESCSRKIWFILNEISLVSELDNLNLLDCLKSVFILDQSSALVLNVSVGWNQIGFLLSCIVEYLQQDFRTLDSNTNNFEFVNLNRSISLSLLNVYIVCFDKDLLENFMSFSNIKGILSKLIYDDSIPSVIRKTLNIVQYTYQLMSNPDGDDIKLYSTSVYNDYVWTPFVDSELESLRARLLDLQ…	MEC1, Cell cycle checkpoint protein with a role in genome integrity; RNA abundance regulated by tyrosol and cell density	266536	6.43	38.03	Stable
C5_05100C_ST58	C5_05100C_A	chr5A	1122899	1124587	ATGTCATTGATCAGGAAAAGGGTATGTTGAAATTGAATATAACGTGTAAAACATTTGTACTTATTTTTGCTTAACAATCAATGTGATTACTAACAATACTTGCACTTGTGTCTTTAGAAATTGAAGGAATTAGAACAAGAACAAGAACAACAACATGGTTCAAAAACCCAACATACACCAGCACATGATAGTTCAGAAGTAGAACTAATTGGACGACTATATAATGTCAACGAAAAAGGAACCAATCTAGATATTCCCAAGAAATCTGTAGTAATTATTGGACGTAGTAGTTCATGTGATATTAGAATCCAAGGAATTGATGTTTCTTCAAAGCATTGTCAATTAAACATTATTCAAACTACCAATAAGCATATTAATACGCGTAGTGAATATTTAAGC…	ATGTCATTGATCAGGAAAAGGAAATTGAAGGAATTAGAACAAGAACAAGAACAACAACATGGTTCAAAAACCCAACATACACCAGCACATGATAGTTCAGAAGTAGAACTAATTGGACGACTATATAATGTCAACGAAAAAGGAACCAATCTAGATATTCCCAAGAAATCTGTAGTAATTATTGGACGTAGTAGTTCATGTGATATTAGAATCCAAGGAATTGATGTTTCTTCAAAGCATTGTCAATTAAACATTATTCAAACTACCAATAAGCATATTAATACGCGTAGTGAATATTTAAGCATTACAGATTTGAGTTCAAATGGGATCAAAATAAATGATGAAAGTATGAGCAAGAGAACAAGTATAATTCTTAAGACAGGAGATAAAATTGCATTT…	MSLIRKRKLKELEQEQEQQHGSKTQHTPAHDSSEVELIGRLYNVNEKGTNLDIPKKSVVIIGRSSSCDIRIQGIDVSSKHCQLNIIQTTNKHINTRSEYLSITDLSSNGIKINDESMSKRTSIILKTGDKIAFAKTGGCYIFRYIISDQEYNEEDDGNVQLKKKKKYASFFDDYILGKQLGSGHYAVVKEAKDKKTGQAVAVKIFHPNKSGLVNKANSAQQQQEDLKLQQEMNLLLSIDHPNIVKFINHYVEPINNYSVNTYLVLEKMNSGELFQRIINKSKLRIDETKAIFRQILSGLKYLHDHDIIHRDIKPENILLDITPKTSPHQKSMGPWDKDEFDIKVKIADFGLAKFIGELKFTNTLCGTPAYVAPEILKPNCRKYSTKVDLWSSGVLLYVC…	DUN1, Protein similar to S. cerevisiae Dun1p, which is a serine-threonine protein kinase involved in DNA damage cell-cycle checkpoint; induced under Cdc5p depletion	60378.5	6.59	44.71	Unstable
C6_00350W_ST59	C6_00350W_A	chr6A	60860	63445	ATGTCAGGGTTAGAACATCTACAGAACTTATCTATCCAGCCGTCAAATCGGAGTACTCAGCAGCAACAGACCAATTCTCAACCACAATCACAATACTCACAACTGGCGGCCAAACGAAGATCAGCAAGAGACTATCAATTTGGAGCGAAAATAGGAGAAGGATCATATTCCACAGTATACTCTGCATTGGATAAATACACCAATAGAACTTATGCTATTAAAGTGTTATCGAAACGACATATAGTGAAAGAGAACAAAATTAAATATGTCAATATTGAAAAGACCACTTTGAACAGATTGGGTCAACAACATCCCGGGATTGTTCAATTATATTATACTTTCCAAGATGAGAGTAGCTTGTTTTTTGTTTTGGATTTTGCAGAATATGGGGAGTTGTTG…	ATGTCAGGGTTAGAACATCTACAGAACTTATCTATCCAGCCGTCAAATCGGAGTACTCAGCAGCAACAGACCAATTCTCAACCACAATCACAATACTCACAACTGGCGGCCAAACGAAGATCAGCAAGAGACTATCAATTTGGAGCGAAAATAGGAGAAGGATCATATTCCACAGTATACTCTGCATTGGATAAATACACCAATAGAACTTATGCTATTAAAGTGTTATCGAAACGACATATAGTGAAAGAGAACAAAATTAAATATGTCAATATTGAAAAGACCACTTTGAACAGATTGGGTCAACAACATCCCGGGATTGTTCAATTATATTATACTTTCCAAGATGAGAGTAGCTTGTTTTTTGTTTTGGATTTTGCAGAATATGGGGAGTTGTTG…	MSGLEHLQNLSIQPSNRSTQQQQTNSQPQSQYSQSAAKRRSARDYQFGAKIGEGSYSTVYSALDKYTNRTYAIKVLSKRHIVKENKIKYVNIEKTTLNRLGQQHPGIVQLYYTFQDESSLFFVLDFAEYGELLSIIRKFGSLSESVSKFYMCQIIDAVRFIHSKGVIHRDLKPENILVGHDFNLKITDFGAAKLLGNHEEFNGEKIDYNSVDASPEVSDTDRKGSFVGTAEYVSPELLKHNICGFESDIWAIGCILYQFFNGVPPFKGSTEYLTFEKIINVDYSYKSPIPLPPDVIQLIDSILISEPSARATIPHIMSSRWFSDIPWDDQNFIWHRKVPRFEAFGAITPSPAMPPMMKNGTNRNVNKSNSYHQLQSQISASEFGFIPSIAAKKSYKPPT…	PKH3, Ortholog(s)have protein kinase activity and role in MAPK cascade involved in cell wall organization or biogenesis	96460.4	9.28	52.97	Unstable
C6_01190C_ST60	C6_01190C_A	chr6A	232244	236857	ATGGGACAGAAATTATCACTATTGGCACCATCAGCACCAACTGTTGCTGTGTCATCATATGTGGATGCACTACATAATTATCAATATGTTGAAGTGATAAATAACTCACGATTTTTAAAGACGATAAAGGCAATTGATAAGACGACGGGGAATTTAGTAACAATAAAACTTCTAATTAAACCAGCATCTCCCAATTACTCCATTCAATTACAACAAGTGATTGAATTAATGGTAAAACAATCATCCCTTTTATATCCATTCAAAAATGCATTACCGTGGCACAGATTGATTGAGACTGATCGTGCTGGTTACGTTGTTCGACAAATGATAAAAACAAACTTGTATGATAGACTATCGATCCGTCCATTTCTTGAACCCATTGAAAAATTATTTATAACC…	ATGGGACAGAAATTATCACTATTGGCACCATCAGCACCAACTGTTGCTGTGTCATCATATGTGGATGCACTACATAATTATCAATATGTTGAAGTGATAAATAACTCACGATTTTTAAAGACGATAAAGGCAATTGATAAGACGACGGGGAATTTAGTAACAATAAAACTTCTAATTAAACCAGCATCTCCCAATTACTCCATTCAATTACAACAAGTGATTGAATTAATGGTAAAACAATCATCCCTTTTATATCCATTCAAAAATGCATTACCGTGGCACAGATTGATTGAGACTGATCGTGCTGGTTACGTTGTTCGACAAATGATAAAAACAAACTTGTATGATAGACTATCGATCCGTCCATTTCTTGAACCCATTGAAAAATTATTTATAACC…	MGQKLSLLAPSAPTVAVSSYVDALHNYQYVEVINNSRFLKTIKAIDKTTGNLVTIKLLIKPASPNYSIQLQQVIELMVKQSSLLYPFKNALPWHRLIETDRAGYVVRQMIKTNLYDRLSIRPFLEPIEKLFITYQILKIINEIHSLNIHHGDLKLENFLITSWNWLLLSDFSNLLKPTYIPEDNPNQYSFYFDTSGRRLCYIAPERFYNSQDHPKHISNFNDDGSFTMKNSVTDAMDLFSTGCVIAELYNDGEPTFTLSQLFKFMKNEYTPDLSGIYNKDIVTIIGKLIKLDPNERSSAREILDENKGTCFPEFFYSFLYDFMEMLNNQENFVLNANNDNISISDMKISYIYDNFGLISKSLKFQYSMDESNFSRDDILPMKLNLETMPFNYRIKQSKF…	VPS15, Protein involved in retrograde endosome-to-Golgi protein transport; required for normal virulence	176022	6.46	36.86	Stable
C6_01320W_PI3K05	C6_01320W_A	chr6A	254510	265975	ATGCCTTATACAGAACAGCTTGATGCATTTGTTACGCGACTTAATGATAGTGGCAGTGATTATACCAAGAAACATTCAATTTTATCAGAATTATTAGACACTATAGAATCATTTAATGGAGCCACTGAATATGAATATTTTTTAAAGAATTTAGTTCCCATTTTTATTAAAGATTTGGAACAAGTACCTATATCATTTATAAGTACTTCTCCTCAACATAAATTGAGAAATTCGATTTTAGAAATCATTCATAGATCTATTATGAATGATACTTTCCAACCATTTTCTGAACAAATATTGGATGCTCTAGTTAAAACTTTGATTGAAGAAAATGAAGATAATGGGGTTTTATGTATGAAAATTATTACTAGTTTACACAAAGCTTATAAAAACAAATTG…	ATGCCTTATACAGAACAGCTTGATGCATTTGTTACGCGACTTAATGATAGTGGCAGTGATTATACCAAGAAACATTCAATTTTATCAGAATTATTAGACACTATAGAATCATTTAATGGAGCCACTGAATATGAATATTTTTTAAAGAATTTAGTTCCCATTTTTATTAAAGATTTGGAACAAGTACCTATATCATTTATAAGTACTTCTCCTCAACATAAATTGAGAAATTCGATTTTAGAAATCATTCATAGATCTATTATGAATGATACTTTCCAACCATTTTCTGAACAAATATTGGATGCTCTAGTTAAAACTTTGATTGAAGAAAATGAAGATAATGGGGTTTTATGTATGAAAATTATTACTAGTTTACACAAAGCTTATAAAAACAAATTG…	MPYTEQLDAFVTRLNDSGSDYTKKHSILSELLDTIESFNGATEYEYFLKNLVPIFIKDLEQVPISFISTSPQHKLRNSILEIIHRSIMNDTFQPFSEQILDALVKTLIEENEDNGVLCMKIITSLHKAYKNKLNEKVQPFVDIIGSIYDNMDKTVHDVFSDDDTQGTASATVGDTSTDVKEDSPAPTSGFNEETPTKKLNKAMFSFKTLAECPITMVSLYQSYKQLVSTSLPKFLPKIIHILELQVDKQKQFREESENKIVTSISPDIKNRQAFSDFILGQVKAASFLAYVFIRGYASQHLKPEESKCVPDVILRLLQDCPAELSIARKELLHATRHILSTPFRTQFIPKLELLFNEKILIGDGLTSYETLRPLAYSTVADFIHNVRNELTPAQIWSTV…	TRA1, Subunit of the NuA4 histone acetyltransferase complex	437971	5.9	44.38	Unstable
C6_01710C_ST61	C6_01710C_A	chr6A	358106	360544	ATGACAAAGGAACATTCAATTCGGAACATTTTTAAGAAGGACAAGACACCAGATAATGGATCAGCAACAGCAACACCATCGTCTTCACACACTGGTTTGTCAAAACTTTTCCATAAGGAAAGCAAACCCATCACCCCACCAATGAAAAGAACGCCGTCGGTCTCATCGTTGAAGCGCCGCAACACCAACCCATCCCAAACATCTGGCATTAGTCTCAATCATAATCATCACCATCATCAGGATTCTCAAAACCATAATGATGCCACCACTAGTGGTGGCAATATCCATTCTTCAACACCTGTCAATAGAAGTAGAAGCAACTCTGATAGGCTGGGCCACGTTCCACCAACAGGAAGAAAAGTGCTCTCAAAAGCAGAAACATTTACCCATTTACAACAA…	ATGACAAAGGAACATTCAATTCGGAACATTTTTAAGAAGGACAAGACACCAGATAATGGATCAGCAACAGCAACACCATCGTCTTCACACACTGGTTTGTCAAAACTTTTCCATAAGGAAAGCAAACCCATCACCCCACCAATGAAAAGAACGCCGTCGGTCTCATCGTTGAAGCGCCGCAACACCAACCCATCCCAAACATCTGGCATTAGTCTCAATCATAATCATCACCATCATCAGGATTCTCAAAACCATAATGATGCCACCACTAGTGGTGGCAATATCCATTCTTCAACACCTGTCAATAGAAGTAGAAGCAACTCTGATAGGCTGGGCCACGTTCCACCAACAGGAAGAAAAGTGCTCTCAAAAGCAGAAACATTTACCCATTTACAACAA…	MTKEHSIRNIFKKDKTPDNGSATATPSSSHTGLSKLFHKESKPITPPMKRTPSVSSLKRRNTNPSQTSGISLNHNHHHHQDSQNHNDATTSGGNIHSSTPVNRSRSNSDRSGHVPPTGRKVLSKAETFTHLQQLDTRNAAKNQLRNHRIPSNHLSSPLSAAPHSDKIVYNPYGLNKTATQERPKNTSFYLSGVNDGERVLSNPVASPNDYLPAELQQQHVNLLEDFEIDVGTKKLGDGGSSDVRIINSCHHKKDLYALKKFTLLSKETDEDFYKRVSEEYKIHRKAAISRHVVDAFAILRIQSQSNLTRGWGMVMEFCGGGDLFSVIVKPGWKSTPLAEKYCLFKQIAYGVKFLHDHDIVHRDLKPENVLLDANGLAKLCDFGVSEFGHEVPEDFSSPV…	PTK2, Putative protein kinase of polyamine import; mutation confers hypersensitivity to high concentrations of tunicamycin; YPD flow model biofilm induced; rat catheter and Spider biofilm induced	89288.6	6.62	54.44	Unstable
C6_02190C_ST62	C6_02190C_A	chr6A	454198	455418	ATGCCTCAATCATCGTCAACTTTTATAAATGAATATACTTTACCTGATGTGGTGGAAAATTCTTCCTCGCGTGCCAGTAAAATGACAATTAAAGAATACAAGAGAATAGGAGAAGGTGCATTTGGTACTGTTGTTGAAGCTATGTTGAAATATGAAACTAATTCGTCTAAAGGAAATGATGGCACTGGGTCACATTTACTTGGCCATTTCCGTCATCATAGCCATAGCGACAAGGATAATAATAATACAACCAACAACAACAATAATAACAACAAAGATGGTGAATGGTTAGGACCATTTGCTATTAAACGAGTCCCTGCACAAACTGAATATAAATCACGAGAATTGGAAATTTTACGATTTGTCAGCCATCCTAATATTGTCAGTTTACGATTTTTT…	ATGCCTCAATCATCGTCAACTTTTATAAATGAATATACTTTACCTGATGTGGTGGAAAATTCTTCCTCGCGTGCCAGTAAAATGACAATTAAAGAATACAAGAGAATAGGAGAAGGTGCATTTGGTACTGTTGTTGAAGCTATGTTGAAATATGAAACTAATTCGTCTAAAGGAAATGATGGCACTGGGTCACATTTACTTGGCCATTTCCGTCATCATAGCCATAGCGACAAGGATAATAATAATACAACCAACAACAACAATAATAACAACAAAGATGGTGAATGGTTAGGACCATTTGCTATTAAACGAGTCCCTGCACAAACTGAATATAAATCACGAGAATTGGAAATTTTACGATTTGTCAGCCATCCTAATATTGTCAGTTTACGATTTTTT…	MPQSSSTFINEYTLPDVVENSSSRASKMTIKEYKRIGEGAFGTVVEAMLKYETNSSKGNDGTGSHLLGHFRHHSHSDKDNNNTTNNNNNNNKDGEWLGPFAIKRVPAQTEYKSRELEILRFVSHPNIVSLRFFFDKKSSSDNKVYQNLVMECLPSNLQSEIKYYRQSKYTIPYPHMKAYTFQLARAMLYLHGYGISHRDIKPSNILVDPNTVRLKICDFGSAKKLEPNQPSVSYICSRYYRAPELIVGCSLYTTKIDIWGLGCVIAEMFLGKPIFQGQSPESQLKEIAKLLGPPPNTFFFKSNPQYRGNMYTTRLFNCSIEERFKQIFSNSPSDAIDLLMKILVYDPDVRASPRRVLIHPFFDELKSSQFKVYPRGSSTPIELHLFNFSEYELELLGSL…	MCK1, orf19.3459, Putative serine/threonine/tyrosine (dual-specificity)kinase; disruptants not obtained by UAU1 method	46526.2	9.03	41.1	Unstable
C6_02320C_ST63	C6_02320C_A	chr6A	481253	482839	ATGATGCTTCCACGTAACTCACCACATCGTACAGAATCAACATTAGCGTATAACAACAACAACAGTAACAACAACAACAACAACAACGGTAGCTCATTATTTCAAAGAAAACCTTTAGCGCCAATAAATAGTGAATTCAAGATATCAAAACCACAACATATAAAACCCACTACCCATTCTCATACATTTACCACACCTACACCGAAAACACGAAACACCGCCACCACCACCACCAACAACAACAACAGGAACAATCATCAATATAGAAATCCCAATTTGAATACTTCACTTGTTTTCACACCAACGAAAAACTCATCATCATCATCATCATCGCATTCATCAAGTTTATTATCGTCATCACCATTTGTCGAAGAACCGGAAAATCAACCAGAATCAAAT…	ATGATGCTTCCACGTAACTCACCACATCGTACAGAATCAACATTAGCGTATAACAACAACAACAGTAACAACAACAACAACAACAACGGTAGCTCATTATTTCAAAGAAAACCTTTAGCGCCAATAAATAGTGAATTCAAGATATCAAAACCACAACATATAAAACCCACTACCCATTCTCATACATTTACCACACCTACACCGAAAACACGAAACACCGCCACCACCACCACCAACAACAACAACAGGAACAATCATCAATATAGAAATCCCAATTTGAATACTTCACTTGTTTTCACACCAACGAAAAACTCATCATCATCATCATCATCGCATTCATCAAGTTTATTATCGTCATCACCATTTGTCGAAGAACCGGAAAATCAACCAGAATCAAAT…	MMLPRNSPHRTESTLAYNNNNSNNNNNNNGSSLFQRKPLAPINSEFKISKPQHIKPNTHSHTFTTPTPKTRNTATTTTTNNNNRNNHQYRNPNLNTSLVFTPTKNSSSSSSSSHSSSLLSSSPFVEEPENQPESNHTRATSHYRTTSTSQYKSSANKDASHSLITSSKRKTSTKQTSESTNPKRRTTTTATQNTNNNKILNPSLSSSTIRFSTVSSSTSSSTTSSSSSSHTSPKPQQQLTLDDFEFGKILGKGKLGRVYCVKHKQSGLIFALKVMSKSEIMNLKLEKSLRREIEIQSNLYHINITRLYSWFHDSINIYLLLEYSIEGELYTHLKKLKRFDNIMASNYIFQITQALIFLHQRGIIHRDLKPENIMISLDNQLKLSDFGWSVQINQNQNQN…	IPL1, Putative Aurora kinase; Hap43-induced; induced during planktonic growth; possibly an essential gene, disruptants not obtained by UAU1 method	60405.8	9.88	46.69	Unstable
C6_02340W_ST64	C6_02340W_A	chr6A	489805	491106	ATGGATTTAAGAGTTGGTAAGAAATACCGTATTGGTCGTAAAATTGGATCAGGTTCATTTGGTGACATTTATTTAGGAACCAACATTATATCAGGTGAGGAAGTTGCTATCAAATTGGAAAACACTAAAGCCAAACATCCACAATTGGAATATGAAGCCAAAGTTTATAAAGCATTGAGTGGTGGTGTTGGTATTCCATTTGTTAGATGGTATGGTACTGAATGTGATTATAATGCCATGGTTATTGATTTATTGGGTCCATCTTTAGAAGATTTGTTCAATTATTGTAATCGGAAATTCACTTATAAAACTGTTTTGTTATTGGCTGATCAATTAATTTGTCGTATTGAATACATTCATGCCAGATGTTTTATTCATCGTGATATTAAACCCGATAAT…	ATGGATTTAAGAGTTGGTAAGAAATACCGTATTGGTCGTAAAATTGGATCAGGTTCATTTGGTGACATTTATTTAGGAACCAACATTATATCAGGTGAGGAAGTTGCTATCAAATTGGAAAACACTAAAGCCAAACATCCACAATTGGAATATGAAGCCAAAGTTTATAAAGCATTGAGTGGTGGTGTTGGTATTCCATTTGTTAGATGGTATGGTACTGAATGTGATTATAATGCCATGGTTATTGATTTATTGGGTCCATCTTTAGAAGATTTGTTCAATTATTGTAATCGGAAATTCACTTATAAAACTGTTTTGTTATTGGCTGATCAATTAATTTGTCGTATTGAATACATTCATGCCAGATGTTTTATTCATCGTGATATTAAACCCGATAAT…	MDLRVGKKYRIGRKIGSGSFGDIYLGTNIISGEEVAIKLENTKAKHPQLEYEAKVYKALSGGVGIPFVRWYGTECDYNAMVIDLLGPSLEDLFNYCNRKFTYKTVLLLADQLICRIEYIHARCFIHRDIKPDNFLMGIGRRGSQVNVIDFGLAKKYRDPRTHLHIPYRENKNLTGTARYASVNTHLGIEQSRRDDLESLGYVLIYFCRGSLPWQGLKAATKRQKYDRIMEKKMTTPNNILCKGLPSEFLEYMNYVKTLRFDDKPDYPYLRKLFRDLFKKENYRYDYVFDWTLYKFQQEKQRAQQGKVADGDNQDQQQQQNNQNQTQTQNQQGQITAPQPPVPVSQQQQQQQQIPQHIPTPQQISQQQQQQQQQQQQLPPQQQKTSVTPQLQQYTDQRLQ…	HRR25, Predicted protein serine/threonine kinase; Spider biofilm induced	50486.3	9.42	51.03	Unstable
C6_03010W_PI3K06	C6_03010W_A	chr6A	621127	629748	ATGTCTACGTCAGATATTAACAAAACTATAGCATTATTACAATCATCGAAAATAAAAGAAAGAAATGACGCGTTAAATAATTTAGAGAATATAGCAGCATCGAAATTTAGATTAAATCCCAAACAATTTAGACAATTAACCCAAGCAATATTAGCATTAATTAAGCATGAATCACAAATATATTTCAACAACAAATCCACTACAGTCGACTCAAGATTAAGTCAAGCATCGTATAATCTACGACTCCTCACTGAAAAATCAATTGAAGATACAAGAATCGATTTCAAATACCGCACATATCTTGATTTGTGCATGGGCATAAAAGATCAATTTTTCGTACACTCGGAATTGTTAGAGCCTTGCTCGATTGATTTTATTAAGACTATAACAAGTATTTTG…	ATGTCTACGTCAGATATTAACAAAACTATAGCATTATTACAATCATCGAAAATAAAAGAAAGAAATGACGCGTTAAATAATTTAGAGAATATAGCAGCATCGAAATTTAGATTAAATCCCAAACAATTTAGACAATTAACCCAAGCAATATTAGCATTAATTAAGCATGAATCACAAATATATTTCAACAACAAATCCACTACAGTCGACTCAAGATTAAGTCAAGCATCGTATAATCTACGACTCCTCACTGAAAAATCAATTGAAGATACAAGAATCGATTTCAAATACCGCACATATCTTGATTTGTGCATGGGCATAAAAGATCAATTTTTCGTACACTCGGAATTGTTAGAGCCTTGCTCGATTGATTTTATTAAGACTATAACAAGTATTTTG…	MSTSDINKTIALLQSSKIKERNDALNNLENIAASKFRLNPKQFRQLTQAILALIKHESQIYFNNKSTTVDSRLSQASYNLRLLTEKSIEDTRIDFKYRTYLDLCMGIKDQFFVHSELLEPCSIDFIKTITSILNLSYVKEHLNRKEWSILYIFLVSLINNILDDCEGSFSNNGNNEKLLIDLYTALQNLLQCESSVSINYLQLYDNDNYFKLLRILDKTSELLKKENVIIIIIFRIINKLITVIATEKFKFVNKLIKIGIRLMVYFHHSHWEKLQEQFLIFINLPGTHDLINLHNLPKLIGDRYILSEISTQEDGDSINSQADNQDEVFLYNLGVLIHHLMKKLMSGSFELKTEDIGMCTINNSITWFNLKTIYSDSQNYKPWLLTLGVSRLLKSYYDL…	TEL1, Ortholog(s)have protein serine/threonine kinase activity, telomeric DNA binding activity and role in DNA damage induced protein phosphorylation, double-strand break repair, histone phosphorylation, telomere maintenance	328066	5.58	41.18	Unstable
C7_00740W_AGC09	C7_00740W_A	chr7A	137282	143053	ATGTCGAATACTCCCAATAAATCAACACCTGAACCTGAAAGTACTGTCTTTCACGGATCGATATTTGAACATCCTCATTTGCATCATAGTGTATCAGAGAGGTCAATATCACCACGCCACGTATCAAAAGAAAGTCAAAACCACAACCACAACCACCAACAACAACAACAAGCATCTAACAGTCTCAACTTCTCAGATCAAGTATCAGGATATGATTATCCATCGGCAACTATTGAAGAACAAATAGATTTACGACTCGCGTCGTCTAATAATCCTACTATTGTTATGGAATTAGACTTGGATGGAAATATCCGTTATTTAAGTAAAAATTGGGAATATATTGTTGGAACAAATATCAAGAAAATTGTTAATCGACACATTTCGAAAATTATAATTGGT…	ATGTCGAATACTCCCAATAAATCAACACCTGAACCTGAAAGTACTGTCTTTCACGGATCGATATTTGAACATCCTCATTTGCATCATAGTGTATCAGAGAGGTCAATATCACCACGCCACGTATCAAAAGAAAGTCAAAACCACAACCACAACCACCAACAACAACAACAAGCATCTAACAGTCTCAACTTCTCAGATCAAGTATCAGGATATGATTATCCATCGGCAACTATTGAAGAACAAATAGATTTACGACTCGCGTCGTCTAATAATCCTACTATTGTTATGGAATTAGACTTGGATGGAAATATCCGTTATTTAAGTAAAAATTGGGAATATATTGTTGGAACAAATATCAAGAAAATTGTTAATCGACACATTTCGAAAATTATAATTGGT…	MSNTPNKSTPEPESTVFHGSIFEHPHLHHSVSERSISPRHVSKESQNHNHNHQQQQQASNSLNFSDQVSGYDYPSATIEEQIDLRLASSNNPTIVMELDLDGNIRYLSKNWEYIVGTNIKKIVNRHISKIIIGNNDDDSQVFNIAIDAMTREDISYKVKFITATNHTQRNKDGEEVYNDLNDLLLSRSHDDEQSGILTPHNSMEDMAKNDNIPVNNYFEKQQQQQQQQQQQQQQHLESSQQEPEKIDTSDTSSTLSSEISNDGEIIELEAQGILIHDAKTKLPTHSMWTIRPFKEIDLELTLPIALIDLLGFGSEIFEGYLVSLKNLGIIDEESVPQPKMILCRICETNIPAWFIEKHSDLCVLEHRAAEKLQQYHDAIGEQKELVIRISESLAVSNQS…	RIM15, Ortholog(s)have protein kinase activity	209784	5.62	59.75	Unstable
C7_01320W_CK02	C7_01320W_A	chr7A	266119	267939	ATGTTATTATCCGGTTCTCCTACACAACAACAACAACAACATCAGAAAGAGAATGGATCTGATTCAATATTTTCAGCAGACGAATTTGTCTCGGCATACTGTTTTATATCGCATGATAAGGTCAATTTAATCCCTGTAACCACGGATAATGTGGATGATGAAGATGAAGACAACAATAGCCATAATGGAAATAACATTACAACTCCACACATTACTATCAATGATCTTCATCATGAAGCCATTGAAGATCATGCTGATTTTACTCCTGATAAATTGTATTTGAAAAATAAAAATTTACTTTATAGTCTCAACAATCCTTCAATTTCCGACGTTGAAGTAGAAAATAACAACATCAACAACAACAACAACAGCAACAATACCAATGGTTCTAGTATACCG…	ATGTTATTATCCGGTTCTCCTACACAACAACAACAACAACATCAGAAAGAGAATGGATCTGATTCAATATTTTCAGCAGACGAATTTGTCTCGGCATACTGTTTTATATCGCATGATAAGGTCAATTTAATCCCTGTAACCACGGATAATGTGGATGATGAAGATGAAGACAACAATAGCCATAATGGAAATAACATTACAACTCCACACATTACTATCAATGATCTTCATCATGAAGCCATTGAAGATCATGCTGATTTTACTCCTGATAAATTGTATTTGAAAAATAAAAATTTACTTTATAGTCTCAACAATCCTTCAATTTCCGACGTTGAAGTAGAAAATAACAACATCAACAACAACAACAACAGCAACAATACCAATGGTTCTAGTATACCG…	MLLSGSPTQQQQQHQKENGSDSIFSADEFVSAYCFISHDKVNLIPVTTDNVDDEDEDNNSHNGNNITTPHITINDLHHEAIEDHADFTPDKLYLKNKNLLYSLNNPSISDVEVENNNINNNNNSNNTNGSSIPSTSKDSYTPSPSSSPSSSSLSTPSLNNNIKKKTQVVVAPSIFLPKLVINLADNLNNDFKELKQLLIKIFPAWDNVDNISLSQLTGGITNMLLSCEYTGNDPTKKTGDAEPVLIRVYGHGTNLIIDRHREFISHLILNSIGLAPPVFARFKNGLVYGYLDGRSLKPEEMSKKSLYPLIAQQLGNLHNKVDYKLIEQGIEKIRALKLGRRRRRSSSASITFKKKHHHNSLSGTSSSASGATTAKKRFISNIWELLDDWINIVPINPDL…	orf19.6912, Putative ethanolamine kinase	68302	5.32	47.51	Unstable
C7_02220C_ST65	C7_02220C_A	chr7A	483803	485029	ATGGGTTCATTTTCTTTCCCCAAAAACATAACCACTGCAAATGGTTTCCACCAAGAACAACCAAACATACAGATAGCAGCAACAACAGCAACATCGGGCTCACTAGTAGTGCCAGAACTCACAATAGAACAATTTTCCGAAATAAAACTACCTGCCGTGGGAATCGAGTATAACAAAACATCATCGAAACCAATATATGAAGGTGCCAATGGTATTATATTCAAAGGTAGTGATGCATCACATTCAAAAGTTGTTGTATTGAAACGAGTCAAACAAAAATGTGACCAACCATTGCATGATTATATTCAGCAAGTGTTACGAGAATTCAATACTATGAAAATATGCAATCACAAAAACATTATTTCTATATTTGATCTTGCCACAATATCTGATACTAAA…	ATGGGTTCATTTTCTTTCCCCAAAAACATAACCACTGCAAATGGTTTCCACCAAGAACAACCAAACATACAGATAGCAGCAACAACAGCAACATCGGGCTCACTAGTAGTGCCAGAACTCACAATAGAACAATTTTCCGAAATAAAACTACCTGCCGTGGGAATCGAGTATAACAAAACATCATCGAAACCAATATATGAAGGTGCCAATGGTATTATATTCAAAGGTAGTGATGCATCACATTCAAAAGTTGTTGTATTGAAACGAGTCAAACAAAAATGTGACCAACCATTGCATGATTATATTCAGCAAGTGTTACGAGAATTCAATACTATGAAAATATGCAATCACAAAAACATTATTTCTATATTTGATCTTGCCACAATATCTGATACTAAA…	MGSFSFPKNITTANGFHQEQPNIQIAATTATSGSLVVPELTIEQFSEIKLPAVGIEYNKTSSKPIYEGANGIIFKGSDASHSKVVVLKRVKQKCDQPLHDYIQQVLREFNTMKICNHKNIISIFDLATISDTKELALILPYYPKGDLLNYLSRLRRFKIELSASLKDSIFKQILKGVNYLHGKGIVHRDLKPENFLIDSDGILKISDFGYSLNINNHPLCHEYFKSNPHELYCGTNSFKAPELFTIEHEIKSNRFDFDGYFKDDNTITCFDKSKYLDYWALGIIYFVIFLMKSPWTTANSLDSKNLAYINYCKHYPNSSLKLKEILIELNKKSPSSFITSNNNNNNNGHNNNPALNLFKSLHYDSRESILGLLNPQPDKRLTPNQLLNTNWLSQVYADP…	orf19.6492, Predicted protein serine/threonine kinase and/or protein tyrosine kinase; Spider biofilm induced	46458.5	8.83	36.97	Stable
C7_02990W_ST66	C7_02990W_A	chr7A	648090	652049	ATGAAACTGCAAAGCACAGATACTTTACAGCCACGAATATCGTCAGATAGTCTAGTTTATTCTTCTTCTTCTTCATCAAACGTATATCTGCAGCCGAAATTACCATTTGCAAGATCATATTCAAGTATACCTGAACAAGTACATGATCCGGGTTCTAGACAATCCCTGAAAAACAGCAATACCAACTTTAGCTTTTCTGAACACGATGACTCCATCCAAGAATTTCTAATATCGCCAATCCAGTCTGACATTTTCCCTTATTCCAAAAAGCCGGTAATAAGTCCAGTTTTGGAGTCACCTGAAGCTGGTGGAGATTCTACAATAGTGGAGACATCTTCACCTTCACCCACCAAGTCTGGAACAGTTAGTTTAAATTCAAATGCCATTGGGTCAATTATT…	ATGAAACTGCAAAGCACAGATACTTTACAGCCACGAATATCGTCAGATAGTCTAGTTTATTCTTCTTCTTCTTCATCAAACGTATATCTGCAGCCGAAATTACCATTTGCAAGATCATATTCAAGTATACCTGAACAAGTACATGATCCGGGTTCTAGACAATCCCTGAAAAACAGCAATACCAACTTTAGCTTTTCTGAACACGATGACTCCATCCAAGAATTTCTAATATCGCCAATCCAGTCTGACATTTTCCCTTATTCCAAAAAGCCGGTAATAAGTCCAGTTTTGGAGTCACCTGAAGCTGGTGGAGATTCTACAATAGTGGAGACATCTTCACCTTCACCCACCAAGTCTGGAACAGTTAGTTTAAATTCAAATGCCATTGGGTCAATTATT…	MKSQSTDTLQPRISSDSLVYSSSSSSSNVYSQPKLPFARSYSSIPEQVHDPGSRQSSKNSNTNFSFSEHDDSIQEFLISPIQSDIFPYSKKPVISPVLESPEAGGDSTIVETSSPSPTKSGTVSLNSNAIGSIIGSYDYSKSSLELEKPKPVEEPVFQKDHARDHARQGSDASTISNGSEQVSKDKRFVRYAMNTQSPLVNASNKWQISNVIKWLDKNQFNNSWKETFRRNEISGNRFLELENFDKESMIWKQFSKFLQLDDDLNSVDRFIELLRKESSHELQTRKSLGGGEISPINVKHENRKSTPIYTKHMSTSSVSSSNSSSSISRPLSYVDSKPKEQLSSPSHHSFFRKHSRSTSNESKDAKKRYSSFDDNRVKSVPKNDKKSNGILSTLRKYGG…	BCK1, Ortholog of S. cerevisiae Bck1; MAP kinase kinase kinase of cell integrity pathway; mutant is hypersensitive to caspofungin	148065	8.85	50.41	Unstable
C7_03340C_ST67	C7_03340C_A	chr7A	737814	738770	ATGATGGGGTTTAAGAAAATATTCAAGGTTGAAAACCAAAACTCAGAGTATAAGTTTTCCAGAAATGATATAAAGTCTAGTCAACTAGGGAAAGGGATTACCGGATCAGTTGACTTGTATCAATCTAAAACACTACCACATTTCCAATATGCTGTGAAAACATACCATACTAAAGATATTCACGAATCCAAAAAGGATTACAAAACCCGAGTGTTGTATGAATATCTAATACTATCGAAACTATCACACTGCAACATTATTAAAATTTATGACTATGATGTATCGTTCTCTGGATCAACGATAAAACTATTCTTAGAATTGGGTACTGCCAATCTAAACCAATTGATAATCAAACAAACAAACACCTTCAACATAAACGAAATGTTGTGTATCTGGAAA…	ATGATGGGGTTTAAGAAAATATTCAAGGTTGAAAACCAAAACTCAGAGTATAAGTTTTCCAGAAATGATATAAAGTCTAGTCAACTAGGGAAAGGGATTACCGGATCAGTTGACTTGTATCAATCTAAAACACTACCACATTTCCAATATGCTGTGAAAACATACCATACTAAAGATATTCACGAATCCAAAAAGGATTACAAAACCCGAGTGTTGTATGAATATCTAATACTATCGAAACTATCACACTGCAACATTATTAAAATTTATGACTATGATGTATCGTTCTCTGGATCAACGATAAAACTATTCTTAGAATTGGGTACTGCCAATCTAAACCAATTGATAATCAAACAAACAAACACCTTCAACATAAACGAAATGTTGTGTATCTGGAAA…	MMGFKKIFKVENQNSEYKFSRNDIKSSQLGKGITGSVDLYQSKTLPHFQYAVKTYHTKDIHESKKDYKTRVLYEYLILSKLSHCNIIKIYDYDVSFSGSTIKLFLELGTANLNQLIIKQTNTFNINEMLCIWKQITNAVNYLHELDICHRDLKLENVVFDVNYKLIKVIDFATAQKLNNNELSRGLVGSESYTAPETYSSIQYDGKSSDVWSLGIILCYLINKKQPWKSAMWSNSDYQQFINQDNFSQEPYFVDFPVESLLLTSQILEQDPLRRIKINDFFSDKWFSLIQYCGCGVAGGGIYNKTCGIDHGKSFRVKT	PRR2, Putative serine/threonine protein kinase; mutation confers resistance to 5-fluorocytosine (5-FC	36791.8	8.48	28.15	Stable
C7_04110W_ST68	C7_04110W_A	chr7A	890327	891421	ATGGATGTATTACTATCGATTTTTGGAACTTGCTTGCCTTGCTTCCCCACTTTATCCTCTCCATCAATTATAATAAATAACAACAAATACCGCATCATTAGACTATTAGGCGAAGGTGGATTTTCGTATGTCTACTTGGTGTCTTCTCAAAGCCAACCGTCATCTCAATATGCTCTAAAGAAAATTCGTTGTCCCTATGGAATTCAAGATGAGAGTTTTAAAAATGCTGTTAGAGAAATTAAGAACTACCACCGATTCAAATCACCATACATCATTTCAAGTATCGACGAATTAATACAACTGGAAACTGACGGGTCAAAAAATATTTATATTCTATTGCCATTTTTCCAAAAGTCTTTACAGGACATCATCAATGAGTTGGTTTTAAATAATTCTAAA…	ATGGATGTATTACTATCGATTTTTGGAACTTGCTTGCCTTGCTTCCCCACTTTATCCTCTCCATCAATTATAATAAATAACAACAAATACCGCATCATTAGACTATTAGGCGAAGGTGGATTTTCGTATGTCTACTTGGTGTCTTCTCAAAGCCAACCGTCATCTCAATATGCTCTAAAGAAAATTCGTTGTCCCTATGGAATTCAAGATGAGAGTTTTAAAAATGCTGTTAGAGAAATTAAGAACTACCACCGATTCAAATCACCATACATCATTTCAAGTATCGACGAATTAATACAACTGGAAACTGACGGGTCAAAAAATATTTATATTCTATTGCCATTTTTCCAAAAGTCTTTACAGGACATCATCAATGAGTTGGTTTTAAATAATTCTAAA…	MDVLLSIFGTCLPCFPTLSSPSIIINNNKYRIIRLLGEGGFSYVYLVSSQSQPSSQYALKKIRCPYGIQDESFKNAVREIKNYHRFKSPYIISSIDELIQSETDGSKNIYILLPFFQKSLQDIINELVLNNSKMEESEILRVFIGTCRGLKVMHNHKKTATSTTRLDDDEQDVLLPTSEDDEYEDFTNSTDNNNNNNVQMQELVPFAHHDLKPANVMLSAEGLPVLCDLGSCSRARISVRNRQQALTVQEFAQEHCTLPYRAPELVDVATNCEITEKTDIWSLGCLLYCCCFGYSPFEKLEIEQGANLNLAILQGKYEIPKGNNGYDSKLIELIKKCLQLNPDSRPDIDELLNDVLELTRQLGT	ENV7, Ortholog(s)have role in ascospore formation, conidiophore development, conidium formation, regulation of vacuole fusion, non-autophagic and response to oxidative stress, <a href="#GOsection">more</a>	41227.5	4.98	53.24	Unstable
CR_00120C_MAPK03	CR_00120C_A	chrRA	30873	32402	ATGGATCAACAAGAAGCACCCATATATTATGGCAGATCCGTAAATAAGGTCTACAACCAGGAATTTATCATTGATAGTCGATTCAAAATAGTCAAGGAGTTGGGCCATGGTGCCTATGGTATTGTGTGTTCAGCAAAATACGATAATGGGTCCAAAAAGGTTCCTGATTCAAACAACGGTAATGCCTCATCTTCAGCTAATGCATCGTTTGTGGCAATCAAAAAGATCACTAATATTTTCAGCAAAAACATCTTATGTAAACGTGCTTTGCGTGAATTGAAGTTGTTGCAGTTCTTCAGGGGCCATAAAAATATAACATGTTTATATGATTTGGACATTATCCCCAATCCCATGACAGGCGAGTTTAATGAAATATATTTATACGAAGAATTAATGGAA…	ATGGATCAACAAGAAGCACCCATATATTATGGCAGATCCGTAAATAAGGTCTACAACCAGGAATTTATCATTGATAGTCGATTCAAAATAGTCAAGGAGTTGGGCCATGGTGCCTATGGTATTGTGTGTTCAGCAAAATACGATAATGGGTCCAAAAAGGTTCCTGATTCAAACAACGGTAATGCCTCATCTTCAGCTAATGCATCGTTTGTGGCAATCAAAAAGATCACTAATATTTTCAGCAAAAACATCTTATGTAAACGTGCTTTGCGTGAATTGAAGTTGTTGCAGTTCTTCAGGGGCCATAAAAATATAACATGTTTATATGATTTGGACATTATCCCCAATCCCATGACAGGCGAGTTTAATGAAATATATTTATACGAAGAATTAATGGAA…	MDQQEAPIYYGRSVNKVYNQEFIIDSRFKIVKELGHGAYGIVCSAKYDNGSKKVPDSNNGNASSSANASFVAIKKITNIFSKNILCKRALRELKLLQFFRGHKNITCLYDLDIIPNPMTGEFNEIYLYEELMECDMHQIIRSGQPLSDQHYQSFIYQVLCGLNFIHSADVLHRDLKPGNLLVNADCELKICDFGLARGFSENPDENAGFMTEYVATRWYRAPEIMLSFTNYTKAIDIWSVGCILAELLGGKPLFRGKDYVDQLNQILMILGTPPESTLQRIGSHRAQNYVRSLPITRKASYEELFPDANPLALDLLERMLTLDPRERITVRDALNHKYLELWHDPKEEIECQVKFDFKSFETVDGLDEMKQLIMDEVQKFREFVRKPIEEQQRIQMQLH…	MKC1, MAP kinase; role in biofilm formation, contact-induced invasive filamentation, systemic virulence in mouse, cell wall structure/maintenance, caspofungin response; phosphorylated on surface contact, membrane perturbation, or cell wall stress	59033.7	4.93	45.77	Unstable
CR_00260W_ST69	CR_00260W_A	chrRA	63737	67375	ATGAACAATCAAGACCCAGATTCACAATACCATAATAAAAAGGTGTATCCACCAAATCTACCATCAATTCCACCTCCACCGCAACAACCTTTGAGTGGAAGACCTGCAACACCAAGAATGTTACGTAGTATAAGTGGCACACTAAAGTCTAAAACAGAACTTGCTCACTCTGACAAGGGTCAGGAATCGAACAATGAAACCAAAAATAGCAATTCCCCTCACTATGTACCTGATACACATACCAGACAACCACCACCAGAATCACTCAAATCAAATATTCAAGCTCCAACAGCTGTTCATGGGAATCAGCAAAAAGGACTGTTGTTGCCACCACCATCTATTCCGAATCCAAACACTATGAAACCTGCGCCAACACCAACTGGAGTCGACCAACCACCT…	ATGAACAATCAAGACCCAGATTCACAATACCATAATAAAAAGGTGTATCCACCAAATCTACCATCAATTCCACCTCCACCGCAACAACCTTTGAGTGGAAGACCTGCAACACCAAGAATGTTACGTAGTATAAGTGGCACACTAAAGTCTAAAACAGAACTTGCTCACTCTGACAAGGGTCAGGAATCGAACAATGAAACCAAAAATAGCAATTCCCCTCACTATGTACCTGATACACATACCAGACAACCACCACCAGAATCACTCAAATCAAATATTCAAGCTCCAACAGCTGTTCATGGGAATCAGCAAAAAGGACTGTTGTTGCCACCACCATCTATTCCGAATCCAAACACTATGAAACCTGCGCCAACACCAACTGGAGTCGACCAACCACCT…	MNNQDPDSQYHNKKVYPPNLPSIPPPPQQPLSGRPATPRMLRSISGTLKSKTELAHSDKGQESNNETKNSNSPHYVPDTHTRQPPPESLKSNIQAPTAVHGNQQKGSLLPPPSIPNPNTMKPAPTPTGVDQPPAKQKPSPAPKQPQPQQQQQQQQQQQFHRKSIGDWNFVKTIGAGSMGKVKLAQHNATHEICAVKIIPRAAKLYQRAHANDPPPQTTQEAAQRHKEFEKEVARDRRTIREGALGRLLYHPFICRLYEMVPMTNHYYMLFEYIEGGQMLDYIVAHGSLKERHARKFARGIASALDYCHRNNVVHRDLKIENIMINEKGDIKIIDFGLSNLYAPKNLLKTYCGSLYFAAPELLSAKPYIGPEVDVWSFGVVLYVLVCGKVPFDDQSVSVL…	KIN2, Protein with similarity to S. cerevisiae Kin2p, transcription is positively regulated by Tbf1	133879	9.17	54.66	Unstable
CR_02040W_ST70	CR_02040W_A	chrRA	447150	449222	ATGCCACAACCACCTCCAAATGCATATAAAGCAGGTACTCGATTAACAGTAGGATCACATAAAGTTTCTATTATCAAATATATCTCCGAAGGTGGATTTGCTCATGTATATACTTGCACAATTGATCCACCTTTTCAAGGATCGACTGTTGCCTGTTTGAAAAGAGTAGTGGTACCAAGCAAGTGGCAGTTGAGTTTATTGAGACAAGAAGTAGATGCCATGAGAAGATTAAGAGGTAATAAACACATTGTATCATACATTGATTCTCATGCTTCCCGTTTAGGTGATTCCAATACATCAGGTACCAATCATAGTCAACAACAACAGTATGAAGTATTTTTATTAATGGAATATTGTGAGAATAATGGTTTGATAGATTTTATGAACACTAGGTTGGTC…	ATGCCACAACCACCTCCAAATGCATATAAAGCAGGTACTCGATTAACAGTAGGATCACATAAAGTTTCTATTATCAAATATATCTCCGAAGGTGGATTTGCTCATGTATATACTTGCACAATTGATCCACCTTTTCAAGGATCGACTGTTGCCTGTTTGAAAAGAGTAGTGGTACCAAGCAAGTGGCAGTTGAGTTTATTGAGACAAGAAGTAGATGCCATGAGAAGATTAAGAGGTAATAAACACATTGTATCATACATTGATTCTCATGCTTCCCGTTTAGGTGATTCCAATACATCAGGTACCAATCATAGTCAACAACAACAGTATGAAGTATTTTTATTAATGGAATATTGTGAGAATAATGGTTTGATAGATTTTATGAACACTAGGTTGGTC…	MPQPPPNAYKAGTRLTVGSHKVSIIKYISEGGFAHVYTCTIDPPFQGSTVACLKRVVVPSKWQLSLLRQEVDAMRRLRGNKHIVSYIDSHASRLGDSNTSGTNHSQQQQYEVFLLMEYCENNGLIDFMNTRLVNKLTEKEIIDIMYQVTIGVAMCHHLRPPLIHRDIKIENVLIDGKGVFKLCDFGSSVNYLPPPRNPQELQLMKDDLMQHTTPQYRAPEMIDLSKGFPIDDKSDIWALGIFLYKLCYYTTPFERPNQSSLQELEHTILNCSETLRFSDQPGSIFSPRLKNAIKVCLRADPRRRPNAVQLLGEIAAMKGEKTIPNVVPYSVIEQQRTKQASALEEDTKKGQASFVETKKITSKPKTDPFANIDKSKFLNKSGYKLSSVTAESRTVPARP…	PRK1, Putative protein serine/threonine kinase; mutants sensitive to growth on hydrogen peroxide medium	77636.1	9.52	48.12	Unstable
CR_02210W_ST71	CR_02210W_A	chrRA	490308	493292	ATGTCGACAATCCCATCGCAAGTTGAAATAAATTTCAACAAAATTCATCAACGTTCAAATTCTTCCTCATCCACATCTTCATATCGTATCCCATCTGGAAACAGTTGTATTCCGAGAACAGTAGAAATGCCATCACTACCACCAACGTCAACTCATCATCAACATCAGCAAATGCCTTCTTCATCTTCACACGCACATATTGCCAAAAAAATACATCGAGAAGTTCGATTTGGTGCATATATACTTGGTTCTACCCTTGGTGAAGGTGAATTTGGTAAAGTTAAACTTGGTTGGAGAAAAGATGGTAAACATCCCAGCCAAGTTGCCATTAAATTAATTAAACGATCGACAATAACAAAAGATTCCGATTCGGAAATCAAAATCCACCGAGAGATAAAC…	ATGTCGACAATCCCATCGCAAGTTGAAATAAATTTCAACAAAATTCATCAACGTTCAAATTCTTCCTCATCCACATCTTCATATCGTATCCCATCTGGAAACAGTTGTATTCCGAGAACAGTAGAAATGCCATCACTACCACCAACGTCAACTCATCATCAACATCAGCAAATGCCTTCTTCATCTTCACACGCACATATTGCCAAAAAAATACATCGAGAAGTTCGATTTGGTGCATATATACTTGGTTCTACCCTTGGTGAAGGTGAATTTGGTAAAGTTAAACTTGGTTGGAGAAAAGATGGTAAACATCCCAGCCAAGTTGCCATTAAATTAATTAAACGATCGACAATAACAAAAGATTCCGATTCGGAAATCAAAATCCACCGAGAGATAAAC…	MSTIPSQVEINFNKIHQRSNSSSSTSSYRIPSGNSCIPRTVEMPSLPPTSTHHQHQQMPSSSSHAHIAKKIHREVRFGAYILGSTLGEGEFGKVKLGWRKDGKHPSQVAIKLIKRSTITKDSDSEIKIHREINSLKLLNHPNIVNLVEVMKSGKYIGIVLEYASGGELFDYILQHKYLKENVAKKLFAQLVSGVDYMHAKGLIHRDLKLENLLLDKHRNVIISDFGFVNSYNRDKNDLMKTSCGSPCYAAPELVLSQTAYEGRKVDIWSLGVILYAMLAGYLPFDDDPENEDGSDIIKLYHYICKTPLTFPEYVSPLARDLLRKIIVSDPKKRISIDDIRNHPWLSSHANLLSIRQPEWDKVHSEKQQPIAVEPPQPNKRYSMINERTNSSSLMSPAPR…	orf19.3751, Putative serine/threonine protein kinase; possibly an essential gene, disruptants not obtained by UAU1 method	110113	9.34	55.97	Unstable
CR_03290C_ST72	CR_03290C_A	chrRA	738489	740051	ATGTCACGACACCATTCTTTCCCACTTGATTATGATTCCCCACCCAAGCATCTAACTGTACATTCGTATCACTCGAAGTATCAAACTATCAGTAGTTTGGGTAATGGGAGTTTTGGGACTGTTGATTTGGCAAAAATCAAGTTCTTTAAATTTGACCTATTAAATCTGCACAAAAATAAACTGGGTACTTTATTATGTCCATTGGAAGATTCCAAATGTAACACATCGAACCTAGTTGCCATAAAAACAATGAAAAAGAAATTACCATTATTACAAGAATACTCCAATGTAAAAGAAGTCAAGTTCATTTTGTCTGTACCATCTCACCCATGTTTGGTACAAATATATGAAATGTTTATTGACGACATCCAGTATCAGCTACATATTTCCATGGAAGCG…	ATGTCACGACACCATTCTTTCCCACTTGATTATGATTCCCCACCCAAGCATCTAACTGTACATTCGTATCACTCGAAGTATCAAACTATCAGTAGTTTGGGTAATGGGAGTTTTGGGACTGTTGATTTGGCAAAAATCAAGTTCTTTAAATTTGACCTATTAAATCTGCACAAAAATAAACTGGGTACTTTATTATGTCCATTGGAAGATTCCAAATGTAACACATCGAACCTAGTTGCCATAAAAACAATGAAAAAGAAATTACCATTATTACAAGAATACTCCAATGTAAAAGAAGTCAAGTTCATTTTGTCTGTACCATCTCACCCATGTTTGGTACAAATATATGAAATGTTTATTGACGACATCCAGTATCAGCTACATATTTCCATGGAAGCG…	MSRHHSFPLDYDSPPKHLTVHSYHSKYQTISSLGNGSFGTVDLAKIKFFKFDLLNSHKNKSGTLLCPLEDSKCNTSNLVAIKTMKKKLPLLQEYSNVKEVKFILSVPSHPCLVQIYEMFIDDIQYQLHISMEALNQNLYQLIRSRRNIKFSPVTLKSILSQLLCAIRHIHKCNYFHRDVKPENILVIPTLHFYGSKAAIPPYRKNDNFIIKLGDYGLARHVSNIKPYTAYVSTRWYRSPEILLRQKWYSRPIDIWAFGAVAVETANFVPLFPGSNELDQIWKILKILGTPFVPEPKAINASYVVPLGGYWTEALFLTNKLGIKLPDESGMSIEDIVQHPDSLALIEVIQSCLKWDPSARADATEIAKMQYFKESITMMDTYFETDTVSMNTALNKLAGI…	IME2, Putative serine/threonine protein kinase; mutation confers hypersensitivity to amphotericin B	59079.6	8.97	47.21	Unstable
CR_03900W_ST73	CR_03900W_A	chrRA	884029	885798	ATGACAAGAACAACTCGTATAGATACACAAGAAGCTACAAAGCATAAGGATTTACCACCAGTGCCTTCACCATTATCATTATCATCGAATCCAAATCCAGAATGCCTAATGGAATCCAAAAGTCTAGGTAGGAAGAACTTCAAAAAGCTTTCACTAGATGCATCTCCAGTCAAATCAACAAGCGGTAGCCTAAGGAGTTCTGATATGATGCTGATAAAGGAGCCGACTTCTTTACGACAAAAGAGACAACGCCCGCCACCTATACTTCATTTACCCACTGCATCTTCATCTGCTACGTCCACTCCAACATCCAATATAACAGGGTCTTCATCAGCTTCTTCTATACAATTTGCACAGAAATCCCCTGGGTCAGGTGTAATTGTGAGTCAAACATTGAGC…	ATGACAAGAACAACTCGTATAGATACACAAGAAGCTACAAAGCATAAGGATTTACCACCAGTGCCTTCACCATTATCATTATCATCGAATCCAAATCCAGAATGCCTAATGGAATCCAAAAGTCTAGGTAGGAAGAACTTCAAAAAGCTTTCACTAGATGCATCTCCAGTCAAATCAACAAGCGGTAGCCTAAGGAGTTCTGATATGATGCTGATAAAGGAGCCGACTTCTTTACGACAAAAGAGACAACGCCCGCCACCTATACTTCATTTACCCACTGCATCTTCATCTGCTACGTCCACTCCAACATCCAATATAACAGGGTCTTCATCAGCTTCTTCTATACAATTTGCACAGAAATCCCCTGGGTCAGGTGTAATTGTGAGTCAAACATTGAGC…	MTRTTRIDTQEATKHKDLPPVPSPLSLSSNPNPECLMESKSLGRKNFKKLSLDASPVKSTSGSLRSSDMMSIKEPTSLRQKRQRPPPILHLPTASSSATSTPTSNITGSSSASSIQFAQKSPGSGVIVSQTLSRPSSAGGIPSSGYSSLNVNQSNRNVDPDNVVSTDMILNQISNLDLTSMNHHRQHYQNSHHHLPTTNRKRQTVISSISPTKSSAASSSLEPQIQSLPASSQSPIATTSSLKLNNKDLLTLKQLGSGNSGSVSKILHIPTQKTMAKKIIHIDSKSVIQTQIIRELRILHECHSPYIIEFYGACLNNNNTIVICMEYCNCGSLDKILPLCENKQFPTFVLKKLSFAILSGLTYLYTTHKIIHRDIKPNNVLMTHKGEFKLCDFGVSREL…	HST7, MAP kinase kinase involved in mating and hyphal growth signal transduction pathways; phosphorylates Cek1p; wild-type virulence in mouse systemic infection; functional homolog of S. cerevisiae Ste7p; mutants are hypersensitive to caspofungin	65221.4	8.95	53.54	Unstable
CR_05940W_MAPK04	CR_05940W_A	chrRA	1244534	1245652	ATGAAGAAATCTACTGGCCCCACTCAAACTCGCCAAGTAGTATTCAACATATCTCAAAACTTTAAAGTGCTCAAGATTTTGGGAGAGGGTGCTTATGGCATTGTTGCTTTGGCAGTACATTTACCCACAGAGACTAAGGTGGCCATCAAAAAAATCGAACCATTTGAAAGACCATTATTCTGTCTTCGTACGTTACGAGAAATCAAATTATTAACAAAATTCAAGAACCACGACAATATAGTTCGATTATACGATGTACAAAAACCAATGAATTATGACAGCTTCAATGAAGTTTATCTTATTCAGGAATACATGCCTCTGGATTTGCATAATATCATACACACACATCTTTTGAGCGATCAACACGTTCAGTATTTTATCTATCAGATCCTCAAAGGA…	ATGAAGAAATCTACTGGCCCCACTCAAACTCGCCAAGTAGTATTCAACATATCTCAAAACTTTAAAGTGCTCAAGATTTTGGGAGAGGGTGCTTATGGCATTGTTGCTTTGGCAGTACATTTACCCACAGAGACTAAGGTGGCCATCAAAAAAATCGAACCATTTGAAAGACCATTATTCTGTCTTCGTACGTTACGAGAAATCAAATTATTAACAAAATTCAAGAACCACGACAATATAGTTCGATTATACGATGTACAAAAACCAATGAATTATGACAGCTTCAATGAAGTTTATCTTATTCAGGAATACATGCCTCTGGATTTGCATAATATCATACACACACATCTTTTGAGCGATCAACACGTTCAGTATTTTATCTATCAGATCCTCAAAGGA…	MKKSTGPTQTRQVVFNISQNFKVLKILGEGAYGIVALAVHLPTETKVAIKKIEPFERPLFCLRTLREIKLLTKFKNHDNIVRLYDVQKPMNYDSFNEVYLIQEYMPSDLHNIIHTHLLSDQHVQYFIYQILKGLKMIHSARVIHRDLKPSNILVNEKCDLKICDFGLARLDTKHYNFDEAPRISMLTEYVATRWYRAPEIMLSASNYSTAIDLWSVGCILAELLTYRALFPGSDYINQLKLIFEVLGTPTDEDLQIIKSERAQKFIRSLPTKVKIDLSEFINNHPYRNIKHRGRDQVNPLAIDLLEKLLVFDPAKRITVQDALEHPYLNSYHEQLDEPVTSPIPIEEFDFDIDKKNLDTNDLKKQIFEIVMS	CEK2, MAP kinase required for wild-type efficiency of mating; component of the signal transduction pathway that regulates mating; ortholog of S. cerevisiae Fus3; induced by Cph1, pheromone; transposon mutation affects filamentous growth	43301.7	6.9	40.27	Unstable
CR_06040W_ST74	CR_06040W_A	chrRA	1290764	1292656	ATGGGTGTTTTGGGTAAGATATTTTCACTGTCAAGTAATTTGGCACAACTTGAACACCAACAGAAGCAACAACAACAACAGCAACCACCACCACTGACGAAATTACTACTGAAGCAATCGCCACCACAACCACCACCTCCAGTCAAAACGAAGCCTTCCCCTTCTAATGGAACTACCGTACCAGATGAGGACGATGAGATACTATCTCAGGTTGAAAACGATATTGTGACACCATTACGACAAATCAAACAACCGCAACCACAGCATCCGACTTCTGTCAATACCCCTACTGTAAACAGTGTACGATCAAACAACTCATCACCAAGATTAATTAAAACAAGATCTGTATCACCTTCCAACGGGTTATCATCATCCACCACTTCCCCAATGCTGTTGGAA…	ATGGGTGTTTTGGGTAAGATATTTTCACTGTCAAGTAATTTGGCACAACTTGAACACCAACAGAAGCAACAACAACAACAGCAACCACCACCACTGACGAAATTACTACTGAAGCAATCGCCACCACAACCACCACCTCCAGTCAAAACGAAGCCTTCCCCTTCTAATGGAACTACCGTACCAGATGAGGACGATGAGATACTATCTCAGGTTGAAAACGATATTGTGACACCATTACGACAAATCAAACAACCGCAACCACAGCATCCGACTTCTGTCAATACCCCTACTGTAAACAGTGTACGATCAAACAACTCATCACCAAGATTAATTAAAACAAGATCTGTATCACCTTCCAACGGGTTATCATCATCCACCACTTCCCCAATGCTGTTGGAA…	MGVLGKIFSSSSNLAQLEHQQKQQQQQQPPPSTKLLSKQSPPQPPPPVKTKPSPSNGTTVPDEDDEILSQVENDIVTPLRQIKQPQPQHPTSVNTPTVNSVRSNNSSPRLIKTRSVSPSNGLSSSTTSPMSLELLEDKLKNHQIASPTGSSTQPVAISSNDKPSTGRPSPTVSRTSSFRKPPSRATSVKTRSNSVSSTNLSGSSTNTNPVNNLPRFVMLESGNHEHHLRSAKRQEKLSNMLKDLLGAKKLRGEAKSAVPDIFQGAMQSSTSQLSQQQQQQPQPVKPPTLFAGLVNSVKNSTSPYHQPGTTDVVCSTPLSAATGTSANGIDCRSFAEKYGRCQEVVGRGSFGVVRISHKKLDSTSTTEKLFAVKEFKRKPNESEKKYNRRLTSEFCISSS…	SAT4, orf19.3854, Ortholog of S. cerevisiae Sat4; amphotericin B induced; clade-associated gene expression; Spider biofilm induced	69680.8	9.04	53.38	Unstable
CR_06050W_ST75	CR_06050W_A	chrRA	1293451	1294404	ATGGTAGAGTTATCTGATTATCAACGTCAAGAAAAAGTCGGAGAAGGTACTTATGGGGTTGTTTATAAAGCATTAGATACCAAGCACAATAATAGAGTTGTTGCATTAAAGAAAATTCGATTAGAATCAGAAGATGAAGGTGTACCTAGTACCGCCATTAGAGAAATCTCGTTATTAAAAGAAATGAAAGATGATAATATCGTTCGATTATATGATATTATTCATTCAGATTCTCATAAATTATATTTAGTATTTGAATTTTTGGATTTAGATTTAAAGAAATATATGGAAAGTATTCCTCAAGGAGTTGGACTAGGGGCTAATATGATAAAAAGATTTATGAATCAATTAATTCGAGGTATTAAACATTGTCATTCTCATCGAGTTTTACATCGTGAT…	ATGGTAGAGTTATCTGATTATCAACGTCAAGAAAAAGTCGGAGAAGGTACTTATGGGGTTGTTTATAAAGCATTAGATACCAAGCACAATAATAGAGTTGTTGCATTAAAGAAAATTCGATTAGAATCAGAAGATGAAGGTGTACCTAGTACCGCCATTAGAGAAATCTCGTTATTAAAAGAAATGAAAGATGATAATATCGTTCGATTATATGATATTATTCATTCAGATTCTCATAAATTATATTTAGTATTTGAATTTTTGGATTTAGATTTAAAGAAATATATGGAAAGTATTCCTCAAGGAGTTGGACTAGGGGCTAATATGATAAAAAGATTTATGAATCAATTAATTCGAGGTATTAAACATTGTCATTCTCATCGAGTTTTACATCGTGAT…	MVELSDYQRQEKVGEGTYGVVYKALDTKHNNRVVALKKIRLESEDEGVPSTAIREISLLKEMKDDNIVRLYDIIHSDSHKLYLVFEFLDLDLKKYMESIPQGVGLGANMIKRFMNQLIRGIKHCHSHRVLHRDLKPQNLLIDKEGNLKLADFGLARAFGVPLRAYTHEVVTLWYRAPEILLGGKQYSTGVDMWSVGCIFAEMCNRKPLFPGDSEIDEIFRIFRILGTPNEEIWPDVNYLPDFKSSFPQWKKKPLSEAVPSLDANGIDLLDQMLVYDPSRRISAKRALIHPYFNDNDDRDHNNYNEDNIGIDKHQNMQ	CDC28, Cyclin-dependent protein kinase; interacts with regulatory subunit Cyb1; determination of cell morphology during the cell cycle; phosphorylated mostly by Swe1 and phosphorylation is regulated by Hsl1; 5'-UTR intron; Spider biofilm repressed	36645.6	6.14	33.4	Stable
CR_07090W_PI3K07	CR_07090W_A	chrRA	1540034	1545817	ATGGATTATTCAGGGATTACCCGTGGCTCAATTCGTGCTGAAGCCCTTAAGAAATTGGCCGAATTGACGGTTCAAAATCCATCTTCAAATTTAAAAGAAGTTAATACTGGAATTCAAAAAGATGATTTTTCCAAATTATTATCGGCCACTCCCAAATTACTCAACTCAAGGGGTAAATTGAACGGCAGTGTAAGTAATGGTGGTGGTGCTGGTGGTAGTAGTGGTGTTCGTGATAGATTATCTGAAGTTGCCATTGCTAAAAAGGAATACGAAGTGATTATTGCCCTTAGTGATGCCACTAAAGAACCCATGAAAGTTGACTCTCAAATTCAAGCTTTAATCAACAAGTTTAAAGCTTATCTCTTTGAATTACCAGATCAAAAATTTGCTTATTCAATT…	ATGGATTATTCAGGGATTACCCGTGGCTCAATTCGTGCTGAAGCCCTTAAGAAATTGGCCGAATTGACGGTTCAAAATCCATCTTCAAATTTAAAAGAAGTTAATACTGGAATTCAAAAAGATGATTTTTCCAAATTATTATCGGCCACTCCCAAATTACTCAACTCAAGGGGTAAATTGAACGGCAGTGTAAGTAATGGTGGTGGTGCTGGTGGTAGTAGTGGTGTTCGTGATAGATTATCTGAAGTTGCCATTGCTAAAAAGGAATACGAAGTGATTATTGCCCTTAGTGATGCCACTAAAGAACCCATGAAAGTTGACTCTCAAATTCAAGCTTTAATCAACAAGTTTAAAGCTTATCTCTTTGAATTACCAGATCAAAAATTTGCTTATTCAATT…	MDYSGITRGSIRAEALKKLAELTVQNPSSNLKEVNTGIQKDDFSKLLSATPKLLNSRGKLNGSVSNGGGAGGSSGVRDRLSEVAIAKKEYEVIIALSDATKEPMKVDSQIQALINKFKAYLFELPDQKFAYSIVSNSATISPWNLLGEKLTTGLINLAMQNTKQYLDEVVDIFQEFIEKFFDNMNLHLTHFLTLAGVLDGFNQNAKFLSISSRTYKIFIALDSNIDDADFLNDVENYTDYLYDEPNEFQDLLTRDFVINFSPILYLESLSRLMCAIVNGIIDNKDQSLLHYILEKVANKYDQVDDKSNSAVFAKDNLDFSRAHMDIINNLTGLALRKLEFLDRGETYIVYSTYDRLKLGYLAKSHNLQILSCGMFTDNLDLKTSRKLFKSSIEIRDVML…	STT4, Putative phosphatidylinositol-4-kinase	219085	6.28	36.47	Stable
CR_07700W_ST76	CR_07700W_A	chrRA	1671100	1672311	ATGTCTGCTCCAGAACTTACTGATATTAGATCTCCTTTAGATATAAACAAATTAAAAGATTTGCTTGCCTCAGCCACAACCTCACAATCTAGTAAAGTGGTTTTGGGTCATAAAGCAACAGTTCCAACCACTTTTAGTGAAATCAAACAATTTACATTTGGTCAATCCAATCCAACATATTTTCTTTCTACTCCAGAAGGGAAAAACTATGTTTTACGTAGGAAACCATCTCCTAATTCCAAATTGATTTCCAAACTGGCTCATGCCGTGGAAAGAGAATTTTTCATTTTGAATGCTATCAATATTTTGAATTCTGAATCGGACAACCTTACTGTACCAGTCCCTAAAGTTCATTTGTTATGTGAAGATGAATCACAGATTGGTTATGTGTTTTATATT…	ATGTCTGCTCCAGAACTTACTGATATTAGATCTCCTTTAGATATAAACAAATTAAAAGATTTGCTTGCCTCAGCCACAACCTCACAATCTAGTAAAGTGGTTTTGGGTCATAAAGCAACAGTTCCAACCACTTTTAGTGAAATCAAACAATTTACATTTGGTCAATCCAATCCAACATATTTTCTTTCTACTCCAGAAGGGAAAAACTATGTTTTACGTAGGAAACCATCTCCTAATTCCAAATTGATTTCCAAACTGGCTCATGCCGTGGAAAGAGAATTTTTCATTTTGAATGCTATCAATATTTTGAATTCTGAATCGGACAACCTTACTGTACCAGTCCCTAAAGTTCATTTGTTATGTGAAGATGAATCACAGATTGGTTATGTGTTTTATATT…	MSAPELTDIRSPLDINKLKDLLASATTSQSSKVVLGHKATVPTTFSEIKQFTFGQSNPTYFLSTPEGKNYVLRRKPSPNSKLISKSAHAVEREFFILNAINILNSESDNLTVPVPKVHLLCEDESQIGYVFYIMDYVNGIQIKNPSMPGIEESDQKQYWKSIIETIAAIHLLNVEKLISLLPKSHFPQFQNIEKLKSTSYFARQIKTLNNIHNLQSQHVPPIPDFDKITGWLQKYAPQDPDKLTLIHGDLKIDNILFDPKSKTVCGVLDWELTTVGNPLFDLANFLQAFQLPNKLNRMLYYPQKTEMGAENKNSTAFLYEKLHEYEKLVTWSKTDSKNNPSELWPIGHTFGLLRLSVISQGIAMRVKLGNASSANAKGYASMYPYLSELAMENVNKTKK…	orf19.1985, Has aminoglycoside phosphotransferase and protein kinase domains; rat catheter and flow model biofilm induced	45538.7	8.83	51.84	Unstable
CR_08960C_ST77	CR_08960C_A	chrRA	1916751	1918823	ATGCCACATGATTTATTATCACATGTGGCGACGAGTTTTTCCCTGCATCGGTCGTCACCATCAAGCAACAATTCAACCAAACGACGTTTAGCATTAGAGGACGACCCAACAGTTCTACCCCCGGCATTAAGCTCATATAGCATACAGTGTTTGAATGAAAGAACCAAAACTTCTACACTACCATCTCAAATAACAGGAAAGTATGAGTTAGATTTCCCAGATTCCTCCAGTAAAAGAGACAATACATTACGAAACAAACTAGCTGCACATTTTACAAACGAATCAACCCGATCTCGTGAAATATCTAATTCATTTACAAATTTGTCTGAAGATAGATCAAGTATAAATACTGCAGCGACAACAACACCAGGCAGCAAAACATTTGAAGACTTGCGTAGT…	ATGCCACATGATTTATTATCACATGTGGCGACGAGTTTTTCCCTGCATCGGTCGTCACCATCAAGCAACAATTCAACCAAACGACGTTTAGCATTAGAGGACGACCCAACAGTTCTACCCCCGGCATTAAGCTCATATAGCATACAGTGTTTGAATGAAAGAACCAAAACTTCTACACTACCATCTCAAATAACAGGAAAGTATGAGTTAGATTTCCCAGATTCCTCCAGTAAAAGAGACAATACATTACGAAACAAACTAGCTGCACATTTTACAAACGAATCAACCCGATCTCGTGAAATATCTAATTCATTTACAAATTTGTCTGAAGATAGATCAAGTATAAATACTGCAGCGACAACAACACCAGGCAGCAAAACATTTGAAGACTTGCGTAGT…	MPHDLLSHVATSFSSHRSSPSSNNSTKRRLALEDDPTVLPPALSSYSIQCLNERTKTSTLPSQITGKYELDFPDSSSKRDNTLRNKLAAHFTNESTRSREISNSFTNLSEDRSSINTAATTTPGSKTFEDLRSKRKRRFGKSLGPPKRGTDFVQESTPIGDELSPKIESKFNITPQHKSLSEIIPKAPSLERFSPLLKKNHSSIDAEDTITKRIEARRREQMEQEFVKKEKENELAELKIKKLEQIAALQSPYEEHKSKEFQEPKQSRMPLREIPVNSAVDVFRKPKAPKSAISPSPNVQSNSMIPPAQPVFRNTLQDFPKPPQQPQASSQNQQQVLPSAPIPPKAHYDRPQHSGNKRALIINDKSYEKLELIGKGGSSKVYRVRSLNNNCVYALKKVE…	MPS1, Monopolar spindle protein, putative spindle assembly checkpoint kinase; essential for growth; involved in oxidative stress response; periodic mRNA expression, peak at cell-cycle S/G2 phase	77694.2	9.02	53.96	Unstable
CR_10660W_ST78	CR_10660W_A	chrRA	2257148	2258155	ATGTCCTCGCACCGCCATAATACAGTGCAATCAGTCTCAAGGGTATATGCCGATGTCCTTTCCACCAAACCACAGTCCTACTGGGACTATGATGACCTTAACATAAAATGGAACCCGCAAGAAAATTACGAGATACTTAGAAAATTGGGACGAGGCAAGTACTCCGAAGTCTTTTTGGGAATAGACTTGGAAAAGAGAGAAAAGGTGGTTATCAAAGTATTGAAGCCAGTTAAACGGAAGAAAATCAAAAGAGAAATTTCCATTTTGAAGAACTTGGTAGATGGCCCTAATATTATTGCGATGTTGGATGTGGTTAGAGAGCCGCAACTGAAAACACCAGGGCTTATCTTTGAACATATTAATAACATCGACTTTAGGTCTTTGTACCCTACTTTTACT…	ATGTCCTCGCACCGCCATAATACAGTGCAATCAGTCTCAAGGGTATATGCCGATGTCCTTTCCACCAAACCACAGTCCTACTGGGACTATGATGACCTTAACATAAAATGGAACCCGCAAGAAAATTACGAGATACTTAGAAAATTGGGACGAGGCAAGTACTCCGAAGTCTTTTTGGGAATAGACTTGGAAAAGAGAGAAAAGGTGGTTATCAAAGTATTGAAGCCAGTTAAACGGAAGAAAATCAAAAGAGAAATTTCCATTTTGAAGAACTTGGTAGATGGCCCTAATATTATTGCGATGTTGGATGTGGTTAGAGAGCCGCAACTGAAAACACCAGGGCTTATCTTTGAACATATTAATAACATCGACTTTAGGTCTTTGTACCCTACTTTTACT…	MSSHRHNTVQSVSRVYADVLSTKPQSYWDYDDLNIKWNPQENYEILRKLGRGKYSEVFLGIDLEKREKVVIKVLKPVKRKKIKREISILKNLVDGPNIIAMLDVVREPQSKTPGLIFEHINNIDFRSLYPTFTDYDIRFYMYELLKALDYSHSMGIMHRDVKPHNVMIDHDKKLLRLIDWGLAEYYHPGTEYNVRVASRYFKGPELLVDYRLYDYSLDMWSFGCMLASMVFMKEPFFHGKSNTDQLVQIVRVLGSKNFKKYLEKYNISLGEEYEDIGYYNKRQWVRFMNENNKDLVSQEFLDLIDRLLRYDHQERLTAKEAMKHAYFDPIRVAVS	CKA1, Putative alpha subunit (catalytic subunit)of protein kinase CK2; Cka1p and Cka2p have a common target with respect to fluconazole resistance; synthetically lethal with CKA2; flucytosine induced	39959.6	8.86	44.75	Unstable
*Stability or instability is one of the physicochemical properties of a protein which can be defined according to its instability index value (prediction of regional instability by calculating the weighted sum of dipeptides). If instability index is lower than 40 then the protein is stable and if higher then it is instable.

## Sheet: Supplementary Table S3
Supplementary Table S3: Summary of orthologous protein kinase-encoding genes between Candida albicans and C. dubliniensis
Protein ID	Gene ID	Position on C. albicans genome			Ortholog gene ID	Position on C. dubliniensis genome
		Chromosome	Start (bp)	End (bp)		Chromosome	Start (bp)	End (bp)
Q5AB87	C1_00180W_A	1	31842	32444	Cd36_00190	1	44158	44760
Q5ABC3	C1_00590W_A	1	95214	96494	Cd36_00520	1	105502	106782
Q5ABP4	C1_00730C_A	1	126791	128620	Cd36_00650	1	137377	139200
C1_00950C_ST01	C1_00950C_A	1	191444	193405	Cd36_19800	1	207275	209236
C4YFC5	C1_01350C_A	1	263479	264672	Cd36_01250	1	278577	279770
Q5A8X6	C1_01690C_A	1	342930	343901	Cd36_01550	1	357000	357971
C1_02120C_ST02	C1_02120C_A	1	442448	444235	Cd36_71150	1	458139	459959
C4YF39	C1_02330C_A	1	487350	488196	Cd36_02180	1	502604	503463
Q5AIA2	C1_02620C_A	1	549494	550573	Cd36_02440	1	564978	566057
C4YEX3	C1_03020C_A	1	631014	631622	Cd36_02820	1	651463	652071
C1_03470C_ST03	C1_03470C_A	1	731029	732438	Cd36_24320	1	752125	753543
C4YES6	C1_03510C_A	1	739135	739680	Cd36_03300	1	760286	760831
C4YEL8	C1_04180W_A	1	871931	872323	Cd36_03940	1	901024	901416
C4YEK7	C1_04290C_A	1	886010	889117	Cd36_04040	1	915253	917268
C4YEK6	C1_04300C_A	1	890373	892310	Cd36_04050	1	919866	921809
C1_04520C_ST04	C1_04520C_A	1	932754	933831	Cd36_35460	1	962156	963206
C1_04780C_ST05	C1_04780C_A	1	994377	997034	Cd36_19330	1	1028286	1030925
Q5A2A5	C1_05290W_A	1	1111172	1113130	Cd36_05030	1	1149047	1151005
C1_05370C_ST06	C1_05370C_A	1	1125926	1128109	Cd36_11350	1	1163711	1165897
C1_06090C_ST07	C1_06090C_A	1	1274861	1277509	Cd36_04530	1	1313512	1315584
C4YE44	C1_06100C_A	1	1278575	1280680	Cd36_05770	1	1317430	1319556
C1_06360W_AGC01	C1_06360W_A	1	1353982	1355679	Cd36_21410	1	1387699	1389408
Q5AAQ5	C1_06550W_A	1	1398176	1404556	Cd36_06130	1	1431140	1437520
C1_06680W_PI3K01	C1_06680W_A	1	1427895	1430957	Cd36_06260	1	1462152	1465247
C1_06710W_ST08	C1_06710W_A	1	1435371	1436402	Cd36_73780	1	1469633	1470664
C1_06780W_ST09	C1_06780W_A	1	1447122	1449623	Cd36_44160	1	1481283	1483754
A0A0A6L5F7	C1_06890C_A	1	1468465	1469275	Cd36_06440	1	1502551	1503359
C1_07380C_ST10	C1_07380C_A	1	1595184	1598036	Cd36_18430	1	1628168	1631023
C1_07640C_ST11	C1_07640C_A	1	1651145	1653661	Cd36_60300	1	1682419	1685073
Q5A7A0	C1_07890C_A	1	1718492	1720900	Cd36_07420	1	1752950	1755358
C1_07970C_ST12	C1_07970C_A	1	1731592	1735263	Cd36_07490	1	1766015	1769683
V5UZY2	C1_08500C_A	1	1864127	1865449	Cd36_08010	1	1904197	1905519
C1_08540C_AGC02	C1_08540C_A	1	1868417	1870555	Cd36_05100	1	1908525	1910651
Q59QB7	C1_08560W_A	1	1872858	1874522	Cd36_08070	1	1912991	1914655
C1_10010C_ST13	C1_10010C_A	1	2189027	2192563	Cd36_09410	1	2228738	2232274
C1_10210C_ST14	C1_10210C_A	1	2249405	2252335	Cd36_20348	1	2294053	2297001
C1_10220C_AGC03	C1_10220C_A	1	2255500	2256717	Cd36_62380	1	2300386	2301615
C1_10380C_AGC04	C1_10380C_A	1	2296797	2298995	Cd36_24610	1	2340572	2342770
Q59W54	C1_11330C_A	1	2486989	2487297	Cd36_10630	1	2522900	2523205
C1_11400C_ST15	C1_11400C_A	1	2497783	2501832	Cd36_10690	1	2533761	2537801
C1_12120W_ST16	C1_12120W_A	1	2648544	2650742	Cd36_09770	1	2688506	2690713
C1_12410C_ST17	C1_12410C_A	1	2700195	2703026	Cd36_06890	1	2739064	2742492
C1_13470W_ST18	C1_13470W_A	1	2952022	2954022	Cd36_34440	1	2986663	2988741
C1_14010W_ST19	C1_14010W_A	1	3087546	3088738	Cd36_22400	1	3120502	3121704
C4YJ73	C2_01110C_A	2	178287	179666	Cd36_16000	2	186458	187834
Q5ADI3	C2_01120W_A	2	180775	182838	Cd36_16010	2	188912	190969
Q5ALV6	C2_01610C_A	2	287835	288194	Cd36_16470	2	291334	291693
Q5ALQ9	C2_02030W_A	2	392597	393825	Cd36_16830	2	396409	397518
Q5A0L0	C2_03010C_A	2	603455	604696	Cd36_17780	2	611504	612745
Q5A0T8	C2_03080W_A	2	620854	621963	Cd36_17850	2	628740	629849
C4YJQ8	C2_03100W_A	2	623498	626224	Cd36_17870	2	631601	634093
C4YJS4	C2_03270W_A	2	675806	676552	Cd36_18020	2	682199	682945
C2_03320W_HK01	C2_03320W_A	2	683898	691313	Cd36_18070	2	690409	697812
C2_03330C_MAPK01	C2_03330C_A	2	691444	692577	Cd36_33350	2	697954	699087
C2_03760C_ST20	C2_03760C_A	2	792275	795163	Cd36_19010	2	796033	798897
C2_03770C_ST21	C2_03770C_A	2	795612	798083	Cd36_06350	2	801571	804039
C4YJX2	C2_03820C_A	2	805679	806736	Cd36_18490	2	811626	812679
C2_03940C_AGC05	C2_03940C_A	2	825401	827764	Cd36_23040	2	831530	833992
C4YI82	C2_03960W_A	2	831558	832282	Cd36_18610	2	841748	842495
C2_04260W_ST22	C2_04260W_A	2	893030	894856	Cd36_51010	2	909012	910880
C2_04270W_ST23	C2_04270W_A	2	895055	896074	Cd36_06280	2	911042	912076
C2_04290W_ST24	C2_04290W_A	2	899422	900651	Cd36_21480	2	915281	916510
Q59K50	C2_04310W_A	2	902492	903700	Cd36_18960	2	918301	919509
C2_04360W_ST25	C2_04360W_A	2	911437	914340	Cd36_09600	2	927630	930530
C2_04660C_ST26	C2_04660C_A	2	976775	979204	Cd36_80720	2	982056	984446
C2_04760W_ST27	C2_04760W_A	2	997716	1000391	Cd36_42970	2	1001811	1004459
C2_04930C_ST28	C2_04930C_A	2	1027317	1029554	Cd36_18580	2	1029375	1031621
C2_04980C_ST29	C2_04980C_A	2	1038614	1039603	Cd36_04260	2	1040459	1041448
C2_05140W_ST30	C2_05140W_A	2	1060271	1063651	Cd36_19640	2	1062241	1065621
C2_05320W_ST31	C2_05320W_A	2	1093474	1095444	Cd36_12480	2	1097132	1099009
C4YIL5	C2_05410W_A	2	1110394	1111214	Cd36_19890	2	1115538	1116389
C4YIL8	C2_05460W_A	2	1118612	1120126	Cd36_19920	2	1124923	1126437
Q59T44	C2_05610C_A	2	1141641	1142261	Cd36_20060	2	1147784	1148404
Q59T35	C2_05700W_A	2	1165370	1166881	Cd36_20140	2	1171594	1173105
C2_05780C_ST32	C2_05780C_A	2	1180382	1181722	Cd36_03260	2	1186951	1188288
Q59MF7	C2_05890C_A	2	1204413	1205714	Cd36_20310	2	1210956	1212257
C4YIT3	C2_06170C_A	2	1255583	1259896	Cd36_20560	2	1261701	1266014
C2_06600W_ST33	C2_06600W_A	2	1341011	1343941	Cd36_20920	2	1345298	1348444
C2_06670C_AGC06	C2_06670C_A	2	1357769	1359901	Cd36_08050	2	1364753	1366882
C2_07130C_ST34	C2_07130C_A	2	1453673	1455391	Cd36_85410	2	1457184	1458950
C2_07210C_AGC07	C2_07210C_A	2	1469096	1470337	Cd36_84510	2	1472104	1473405
C2_07330W_PI3K02	C2_07330W_A	2	1490143	1497591	Cd36_21600	2	1493184	1500632
C4YK39	C2_07380W_A	2	1506829	1508775	Cd36_21650	2	1509850	1511796
C2_07530C_ST35	C2_07530C_A	2	1535671	1537075	Cd36_20220	2	1538775	1540216
Q5A2T2	C2_08000C_A	2	1621750	1623579	Cd36_22210	2	1624881	1626710
C2_08270C_ST36	C2_08270C_A	2	1671420	1672556	Cd36_18080	2	1670526	1671926
Q59K68	C2_08370C_A	2	1690400	1691776	Cd36_22520	2	1697473	1698849
C4YKG1	C2_08810C_A	2	1790255	1791121	Cd36_22980	2	1807916	1808782
C2_08860W_ST37	C2_08860W_A	2	1797497	1799881	Cd36_19240	2	1817343	1819748
Q59LS1	C2_09430W_A	2	1921832	1923001	Cd36_23540	2	1938454	1939623
C2_10260C_ST38	C2_10260C_A	2	2112284	2113717	Cd36_85620	2	2150908	2152344
C2_10530C_ST39	C2_10530C_A	2	2169608	2170894	Cd36_62550	R	1296018	1297424
Q5A5Q8	C2_10620W_A	2	2189809	2190597	Cd36_24720	2	2257054	2257842
C2_10750C_ST40	C2_10750C_A	2	2208732	2210936	Cd36_19450	2	2236636	2238969
C3_00550C_ST41	C3_00550C_A	3	78180	80270	Cd36_83790	3	80813	82915
C3_00790W_ST42	C3_00790W_A	3	148258	150693	Cd36_61800	3	151441	153870
Q59LN7	C3_00880W_A	3	175319	178309	Cd36_80800	3	178397	181387
Q5AJF7	C3_02110W_A	3	457809	458306	Cd36_82090	3	500296	500793
C3_02260C_ST43	C3_02260C_A	3	489114	490874	Cd36_29180	3	531341	533158
Q5AEN2	C3_02470C_A	3	538857	539432	Cd36_82430	3	581048	581623
Q5AEJ9	C3_02780W_A	3	601267	602643	Cd36_82770	3	648591	649979
C3_03810W_ST44	C3_03810W_A	3	799952	802051	Cd36_20970	3	843290	845392
Q5ANP6	C3_04090W_A	3	856829	857677	Cd36_84020	3	906542	907375
C4YQH1	C3_04140C_A	3	865019	865555	Cd36_84080	3	914438	914974
C3_04470W_AGC08	C3_04470W_A	3	930989	934282	Cd36_84410	3	979477	982815
C3_04550C_ST45	C3_04550C_A	3	960547	961794	Cd36_45970	3	1008871	1010118
C4YQN5	C3_04810C_A	3	1023111	1024388	Cd36_84780	3	1071270	1072540
C4YQP9	C3_04960W_A	3	1067815	1068617	Cd36_84940	3	1115737	1116546
C4YNQ0	C3_05200W_A	3	1130229	1131033	Cd36_85180	3	1181664	1182518
Q5ANA1	C3_05240C_A	3	1153123	1153911	Cd36_85230	3	1204294	1205082
C3_05300C_CK01	C3_05300C_A	3	1168278	1170146	Cd36_31490	3	1218282	1220006
C3_05420W_ST46	C3_05420W_A	3	1205678	1207435	Cd36_82230	3	1254264	1255976
C3_05650W_ST47	C3_05650W_A	3	1263697	1265184	Cd36_25140	3	1313281	1314786
Q5A4I4	C3_05710W_A	3	1279058	1279633	Cd36_85650	3	1325541	1326044
C3_06070C_ST48	C3_06070C_A	3	1378291	1379928	Cd36_05940	3	1422479	1424089
C4YNZ5	C3_06330W_A	3	1452340	1452930	Cd36_86310	3	1509340	1509930
C3_06620W_ST49	C3_06620W_A	3	1510901	1514872	Cd36_86600	3	1571015	1575004
Q5ADM7	C3_06870W_A	3	1574842	1575849	Cd36_86830	3	1636887	1637894
Q5ADQ6	C3_07150C_A	3	1636538	1636969	Cd36_87080	3	1697727	1698158
Q5ADU2	C3_07410C_A	3	1697144	1698928	Cd36_87320	3	1760200	1761984
Q59UT2	C4_00140C_A	4	21178	23694	Cd36_40210	4	29808	32315
C4YI53	C4_00220C_A	4	33383	34763	Cd36_40290	4	42185	43552
C4YHV4	C4_01270W_A	4	255598	256733	Cd36_41260	4	268446	269566
Q5AML4	C4_01520C_A	4	315673	316191	Cd36_41520	4	328751	329305
C4YHS0	C4_01750C_A	4	345920	346999	Cd36_41650	4	357301	358380
Q5AMP4	C4_01900C_A	4	370410	371408	Cd36_41790	4	381421	382419
Q5AF97	C4_02860W_A	4	595171	595815	Cd36_42730	4	607969	608613
Q5AF98	C4_02870C_A	4	595985	597268	Cd36_42740	4	608796	610079
C4_03120C_ST50	C4_03120C_A	4	654505	657207	Cd36_11620	4	666384	669083
C4_04450C_ST51	C4_04450C_A	4	951265	953769	Cd36_07120	4	987703	990201
C4_04460C_ST52	C4_04460C_A	4	954686	958912	Cd36_44170	4	991085	995293
Q5A6A1	C4_04890C_A	4	1054051	1054518	Cd36_44530	4	1092278	1092745
C4_05030C_ST53	C4_05030C_A	4	1071853	1076304	Cd36_44660	4	1109015	1113502
C4YGU8	C4_05320W_A	4	1158925	1160073	Cd36_44980	4	1197085	1198206
C4_06480C_MAPK02	C4_06480C_A	4	1437628	1438893	Cd36_31650	4	1472966	1474219
C4YGJ3	C4_06570C_A	4	1468068	1469771	Cd36_46050	4	1506519	1508222
Q5A0Z9	C4_07110C_A	4	1574155	1575360	Cd36_46580	4	1609686	1610891
Q5A109	C4_07180W_A	4	1585323	1585904	Cd36_46640	4	1620882	1621337
Q59XE4	C5_00790C_A	5	186133	188229	Cd36_51490	5	373756	375801
C5_01320W_ST54	C5_01320W_A	5	294646	296502	Cd36_85280	5	256086	257951
C4YR46	C5_01580C_A	5	347886	351038	Cd36_50780	5	201917	205069
Q59YX6	C5_01820W_A	5	409928	411697	Cd36_51510	5	378010	379764
C4YR86	C5_02000C_A	5	446964	448538	Cd36_51850	5	474335	475909
Q5AGF6	C5_02170C_A	5	482348	483952	Cd36_51990	5	509470	511074
C5_02340C_ST55	C5_02340C_A	5	517861	521547	Cd36_52140	5	543434	547012
C5_02440C_TK01	C5_02440C_A	5	537707	538597	Cd36_31500	5	562529	563395
C5_02840C_ST56	C5_02840C_A	5	631817	636205	Cd36_52630	5	653925	658382
C5_03150W_ST57	C5_03150W_A	5	709951	711870	Cd36_00900	5	743865	745787
Q59NZ2	C5_03540C_A	5	793426	793743	Cd36_53290	5	849140	849457
C5_04060C_PI3K04	C5_04060C_A	5	902120	909097	Cd36_53760	5	957666	964646
A0A0A6MR63	C5_04590C_A	5	997099	997750	Cd36_54210	5	1044244	1044891
C5_05100C_ST58	C5_05100C_A	5	1122899	1124587	Cd36_86000	5	1170632	1172289
Q5AK16	C5_05120W_A	5	1127776	1129365	Cd36_54720	5	1175527	1177116
Q59L90	C6_00100C_A	6	11950	12543	Cd36_60140	6	30128	30724
C6_00350W_ST59	C6_00350W_A	6	60860	63445	Cd36_05760	6	74562	77147
C6_01190C_ST60	C6_01190C_A	6	232244	236857	Cd36_61300	6	249752	254338
C6_01320W_PI3K05	C6_01320W_A	6	254510	265975	Cd36_61420	6	266740	278115
C6_01710C_ST61	C6_01710C_A	6	358106	360544	Cd36_18440	6	372690	375134
C4YSV1	C6_01970C_A	6	402753	403626	Cd36_62095	6	416973	417844
Q59M73	C6_02070C_A	6	424970	425898	Cd36_62220	6	438921	439796
C6_02190C_ST62	C6_02190C_A	6	454198	455418	Cd36_72030	6	467942	469165
C6_02320C_ST63	C6_02320C_A	6	481253	482839	Cd36_54700	6	493940	495676
Q59S96	C6_02330W_A	6	486452	487012	Cd36_62530	6	499848	500420
C6_02340W_ST64	C6_02340W_A	6	489805	491106	Cd36_21800	6	503173	504456
C6_03010W_PI3K06	C6_03010W_A	6	621127	629748	Cd36_63010	6	571388	580009
Q5AC45	C6_03380W_A	6	712164	713270	Cd36_63610	6	676731	677864
Q59QZ9	C6_04290W_A	6	948163	950031	Cd36_64830	6	954511	956328
Q59RJ3	C6_04420W_A	6	985842	986297	Cd36_65120	6	1018190	1018546
Q5AFL1	C7_00620W_A	7	101629	103806	Cd36_70040	7	20545	22719
Q5AFL8	C7_00690W_A	7	127379	128182	Cd36_70640	7	125605	126402
C7_00740W_AGC09	C7_00740W_A	7	137282	143053	Cd36_70680	7	135019	140517
C4YTI4	C7_01250W_A	7	257912	259124	Cd36_71100	7	262433	263632
C7_01320W_CK02	C7_01320W_A	7	266119	267939	Cd36_18910	7	270378	272168
Q5AGX8	C7_01640W_A	7	352678	354111	Cd36_71470	7	356226	357656
C4YTQ8	C7_02030W_A	7	439525	441648	Cd36_71850	7	455078	457213
C7_02220C_ST65	C7_02220C_A	7	483803	485029	Cd36_18940	7	499333	500604
C4YTU2	C7_02380C_A	7	519130	519618	Cd36_72170	7	533290	533778
C7_02990W_ST66	C7_02990W_A	7	648090	652049	Cd36_72650	7	689423	693625
C7_03340C_ST67	C7_03340C_A	7	737814	738770	Cd36_19500	7	779534	780478
Q59R31	C7_03570W_A	7	792047	793453	Cd36_73220	7	837667	839061
Q59R18	C7_03670W_A	7	815421	817079	Cd36_73270	7	844557	846215
C7_04110W_ST68	C7_04110W_A	7	890327	891421	Cd36_31320	7	949417	950505
CR_00120C_MAPK03	CR_00120C_A	R	30873	32402	Cd36_28430	R	29040	30569
CR_00260W_ST69	CR_00260W_A	R	63737	67375	Cd36_25300	R	62490	66122
Q5AAL1	CR_00570W_A	R	134039	135571	Cd36_25670	R	144627	146123
Q5AAL2	CR_00580W_A	R	136149	136787	Cd36_25680	R	146681	147325
Q5AAM4	CR_00640W_A	R	155196	162011	Cd36_25740	R	165377	172063
C4YNI2	CR_00860C_A	R	197957	198460	Cd36_25910	R	208259	208762
Q5A9E1	CR_01390W_A	R	330749	331477	Cd36_26400	R	334396	335121
Q5A9D9	CR_01400W_A	R	332022	333152	Cd36_26410	R	335662	336792
C4YKZ8	CR_01620C_A	R	368747	371050	Cd36_26580	R	371871	374180
C4YL12	CR_01760C_A	R	398686	400464	Cd36_26780	R	399836	401728
C4YL27	CR_01970C_A	R	430298	431046	Cd36_26910	R	426952	427711
CR_02040W_ST70	CR_02040W_A	R	447150	449222	Cd36_80510	R	433743	435827
CR_02210W_ST71	CR_02210W_A	R	490308	493292	Cd36_27170	R	477775	480783
C4YL77	CR_02530W_A	R	561929	564680	Cd36_27480	R	544991	547732
C4YLC1	CR_03030C_A	R	692731	693531	Cd36_28120	R	678559	679362
CR_03290C_ST72	CR_03290C_A	R	738489	740051	Cd36_62510	R	723862	725424
CR_03900W_ST73	CR_03900W_A	R	884029	885798	Cd36_01980	R	873898	875649
Q5A6L1	CR_04530W_A	R	997809	999197	Cd36_29890	R	987195	988583
C4YLT2	CR_04660C_A	R	1016385	1018027	Cd36_30070	R	1005756	1007377
Q59MZ5	CR_04740C_A	R	1027449	1031561	Cd36_30110	R	1016292	1020359
CR_05940W_MAPK04	CR_05940W_A	R	1244534	1245652	Cd36_12990	R	1230291	1231409
CR_06040W_ST74	CR_06040W_A	R	1290764	1292656	Cd36_52940	R	1276980	1278878
CR_06050W_ST75	CR_06050W_A	R	1293451	1294404	Cd36_72990	R	1279668	1280621
Q59V92	CR_06080W_A	R	1297516	1298547	Cd36_31550	R	1283715	1284755
C4YM67	CR_06340C_A	R	1343151	1344803	Cd36_31840	R	1330400	1332052
CR_07090W_PI3K07	CR_07090W_A	R	1540034	1545817	Cd36_32670	R	1510334	1516123
Q59KX4	CR_07520C_A	R	1627966	1628634	Cd36_33140	R	1600957	1601616
CR_07700W_ST76	CR_07700W_A	R	1671100	1672311	Cd36_09610	R	1644060	1645271
Q5A389	CR_08150W_A	R	1772154	1772513	Cd36_33780	R	1744973	1745425
C4YMM9	CR_08210C_A	R	1783404	1785737	Cd36_33840	R	1756473	1758806
Q5A362	CR_08340W_A	R	1805596	1806795	Cd36_33930	R	1778596	1779795
C4YMP9	CR_08460W_A	R	1826834	1827706	Cd36_34050	R	1800219	1801055
C4YMQ1	CR_08480C_A	R	1831039	1831209	Cd36_34070	R	1804359	1804529
CR_08960C_ST77	CR_08960C_A	R	1916751	1918823	Cd36_26950	R	1892740	1894809
CR_10660W_ST78	CR_10660W_A	R	2257148	2258155	Cd36_18920	R	2223866	2224882

## Sheet: Supplementary Table S4
Supplementary Table S4: Summary of orthologous protein kinase-encoding genes between Candida albicans and C. glabrata
Protein ID	Gene ID	Position on C. albicans genome			Ortholog gene ID	Position on C. glabrata genome
		Chromosome	Start (bp)	End (bp)		Chromosome	Start (bp)	End (bp)
C4YFC5	C1_01350C_A	1	263479	264672	CAGL0I04356g	I	389225	390415
C4YEK6	C1_04300C_A	1	890373	892310	CAGL0G03795g	G	363008	364930
Q5AAQ5	C1_06550W_A	1	1398176	1404556	CAGL0L01089g	L	123897	130355
V5UZY2	C1_08500C_A	1	1864127	1865449	CAGL0I02486g	I	220865	222178
Q59QB7	C1_08560W_A	1	1872858	1874522	CAGL0F07887g	F	773115	774794
C1_10220C_AGC03	C1_10220C_A	1	2255500	2256717	CAGL0M08404g	M	836791	838287
C4YCU6	C1_11040W_A	1	2433984	2434175	CAGL0D05214g	D	498243	498422
Q5ADI3	C2_01120W_A	2	180775	182838	CAGL0G03289g	G	312871	314814
Q5ALV6	C2_01610C_A	2	287835	288194	CAGL0K02123g	K	188731	189090
C4YJQ8	C2_03100W_A	2	623498	626224	CAGL0A03234g	A	328577	331105
C4YJS4	C2_03270W_A	2	675806	676552	CAGL0E06358g	E	639077	639820
C4YJX2	C2_03820C_A	2	805679	806736	CAGL0H05511g	H	533744	535108
C4YIL8	C2_05460W_A	2	1118612	1120126	CAGL0M12034g	M	1201576	1203081
Q59T44	C2_05610C_A	2	1141641	1142261	CAGL0A04521g	A	447271	447876
C4YK39	C2_07380W_A	2	1506829	1508775	CAGL0G03795g	G	363008	364930
Q5A2T2	C2_08000C_A	2	1621750	1623579	CAGL0C02343g	C	236112	238672
Q59K68	C2_08370C_A	2	1690400	1691776	CAGL0D01188g	D	136033	137409
C4YKG1	C2_08810C_A	2	1790255	1791121	CAGL0H09878g	H	963767	964630
Q59LS1	C2_09430W_A	2	1921832	1923001	CAGL0G02079g	G	182970	184133
Q5AJF7	C3_02110W_A	3	457809	458306	CAGL0F02937g	F	284659	285156
C3_04470W_AGC08	C3_04470W_A	3	930989	934282	CAGL0M09361g	M	928484	931918
Q5ADM7	C3_06870W_A	3	1574842	1575849	CAGL0G09383g	G	896159	897157
Q5ADU2	C3_07410C_A	3	1697144	1698928	CAGL0K12012g	K	1159993	1161768
C4YHV4	C4_01270W_A	4	255598	256733	CAGL0M06303g	M	654006	655506
Q5AML4	C4_01520C_A	4	315673	316191	CAGL0K07414g	K	734423	734950
C4YHS0	C4_01750C_A	4	345920	346999	CAGL0L02497g	L	295794	296879
C4YGU8	C4_05320W_A	4	1158925	1160073	CAGL0F06875g	F	673222	674340
C4YGJ3	C4_06570C_A	4	1468068	1469771	CAGL0M07920g	M	789467	791161
Q5A109	C4_07180W_A	4	1585323	1585904	CAGL0G08173g	G	776549	777007
C4YR46	C5_01580C_A	5	347886	351038	CAGL0B03487g	B	345399	348536
C4YTQ8	C7_02030W_A	7	439525	441648	CAGL0L00495g	L	55122	57239
C4YTU2	C7_02380C_A	7	519130	519618	CAGL0J08954g	J	882437	883552
Q5AAM4	CR_00640W_A	R	155196	162011	CAGL0L10780g	L	1151884	1158585
C4YKZ8	CR_01620C_A	R	368747	371050	CAGL0I04994g	I	457287	459590
C4YM67	CR_06340C_A	R	1343151	1344803	CAGL0H05445g	H	527157	528824
C4YMM9	CR_08210C_A	R	1783404	1785737	CAGL0D06424g	D	605107	607440
