# Supplementary material for: A comprehensive analysis of Candida albicans phosphoproteome reveals dynamic changes in phosphoprotein abundance during hyphal morphogenesis
Source: Springer Nature journal article supplement (doi:10.1007/s00253-018-9303-z), 2018-08-18
Supplement: MOESM3 [file 253_2018_9303_MOESM3_ESM.xlsx]

## Sheet: Title Page
Dataset
Applied Microbiology and Biotechnology
A comprehensive analysis of Candida albicans phosphoproteome reveals dynamic changes in phosphoprotein abundance during hyphal morphogenesis
Priyanka Ghorai1,2, Mohammad Irfan1, Alka Narula2, Asis Datta1*
1National Institute of Plant Genome Research, Aruna Asaf Ali Marg, New Delhi – 110067, India
2Department of Biotechnology, Faculty of Science, Jamia Hamdard, Hamdard Nagar, New Delhi – 110062, India
*Corresponding author
Asis Datta
National Institute of Plant Genome Research
Aruna Asaf Ali Marg
New Delhi 110067, India
E-mail: asis_datta@rediffmail.com
Tel.: +91-11-26742750
Fax: +91-11-26741658

## Sheet: Uninduced Replicate 1 Protein
N	Unused	Total	% Cov	Accession #	Name	Species	Peptides(95%)	Biological Processes	Molecular Functions	PANTHER ID
1	93.17	93.17	64	tr|C4YDJ3|C4YDJ3_CANAW	Elongation factor 1-alpha OS=Candida albicans (strain WO-1) GN=CAWG_00588 PE=3 SV=1	CANAW	110
2	80.91	80.91	49.4	tr|Q5A397|Q5A397_CANAL	Hsp75-like protein OS=Candida albicans (strain SC5314 / ATCC MYA-2876) GN=SSB1 PE=3 SV=1	CANAL	55
3	79.77	79.77	81.5	tr|Q5ADM7|Q5ADM7_CANAL	Glyceraldehyde-3-phosphate dehydrogenase OS=Candida albicans (strain SC5314 / ATCC MYA-2876) GN=TDH3 PE=3 SV=1	CANAL	57
4	77.31	77.31	60.1	tr|V5UZY2|V5UZY2_CANAX	Enolase (Fragment) OS=Candida albicans PE=3 SV=1	CANAX	50
5	64.16	65.04	38.9	tr|C4YEK6|C4YEK6_CANAW	Heat shock protein SSA2 OS=Candida albicans (strain WO-1) GN=CAWG_00963 PE=3 SV=1	CANAW	40
6	63.66	63.66	41.1	tr|A0A0A6PP16|A0A0A6PP16_CANAX	Elongation factor 2 OS=Candida albicans P78042 GN=MGS_01711 PE=4 SV=1	CANAX	49
7	62.86	62.86	58.7	tr|A0A0A6Q6F7|A0A0A6Q6F7_CANAL	Pyruvate kinase OS=Candida albicans (strain SC5314 / ATCC MYA-2876) GN=I503_01989 PE=3 SV=1	CANAL	42
8	61.97	61.97	67.6	tr|C4YS13|C4YS13_CANAW	Alcohol dehydrogenase I OS=Candida albicans (strain WO-1) GN=CAWG_04871 PE=3 SV=1	CANAW	48
9	59.87	59.87	46.3	tr|A0A0A6NQP2|A0A0A6NQP2_CANAL	Hsp60-like protein OS=Candida albicans (strain SC5314 / ATCC MYA-2876) GN=W5Q_06099 PE=3 SV=1	CANAL	34
10	55.85	55.85	63.8	tr|A0A0A6MFW7|A0A0A6MFW7_CANAL	Phosphoglycerate kinase OS=Candida albicans (strain SC5314 / ATCC MYA-2876) GN=I503_04640 PE=3 SV=1	CANAL	34
11	46.67	46.67	50.1	tr|C4YGJ3|C4YGJ3_CANAW	Pyruvate decarboxylase OS=Candida albicans (strain WO-1) GN=CAWG_03171 PE=3 SV=1	CANAW	48
12	46.49	46.49	54	tr|C4YJS4|C4YJS4_CANAW	Phosphoglycerate mutase 1 OS=Candida albicans (strain WO-1) GN=CAWG_04094 PE=3 SV=1	CANAW	34
13	43.23	43.23	49.1	tr|Q59LS1|Q59LS1_CANAL	60S ribosomal protein L3 OS=Candida albicans (strain SC5314 / ATCC MYA-2876) GN=RPL3 PE=3 SV=1	CANAL	25
14	41.55	43.44	54.3	tr|C4YK39|C4YK39_CANAW	Heat shock protein SSC1, mitochondrial OS=Candida albicans (strain WO-1) GN=CAWG_05834 PE=3 SV=1	CANAW	27
15	41	41	31.1	tr|C4YTQ8|C4YTQ8_CANAW	ATP-dependent molecular chaperone HSP82 OS=Candida albicans (strain WO-1) GN=CAWG_05553 PE=3 SV=1	CANAW	30
16	36.03	36.03	65.4	tr|C4YEX3|C4YEX3_CANAW	60S ribosomal protein L13 OS=Candida albicans (strain WO-1) GN=CAWG_01082 PE=3 SV=1	CANAW	21
17	35.01	35.01	16.2	tr|A0A0A6MH57|A0A0A6MH57_CANAX	Fatty acid synthase subunit alpha OS=Candida albicans P37039 GN=MGC_02937 PE=3 SV=1	CANAX	21
18	32.38	32.38	36.5	tr|Q5A8Y0|Q5A8Y0_CANAL	40S ribosomal protein S4 OS=Candida albicans (strain SC5314 / ATCC MYA-2876) GN=RPS42 PE=3 SV=1	CANAL	17
19	30.66	30.66	59.6	tr|Q5A109|Q5A109_CANAL	Polyubiquitin OS=Candida albicans (strain SC5314 / ATCC MYA-2876) GN=UBI3 PE=4 SV=1	CANAL	25
20	30	30	60.7	tr|Q5AEN2|Q5AEN2_CANAL	Likely cytosolic ribosomal protein L9 OS=Candida albicans (strain SC5314 / ATCC MYA-2876) GN=RPL9B PE=4 SV=1	CANAL	17
21	29.88	29.88	98.2	tr|Q5AJF7|Q5AJF7_CANAL	60S ribosomal protein L12 OS=Candida albicans (strain SC5314 / ATCC MYA-2876) GN=RPL12 PE=3 SV=1	CANAL	19
22	27.92	27.92	67.7	tr|C4YF39|C4YF39_CANAW	60S ribosomal protein L26-B OS=Candida albicans (strain WO-1) GN=CAWG_01150 PE=4 SV=1	CANAW	19
23	27.56	27.56	41	tr|C4YHS0|C4YHS0_CANAW	Fructose-bisphosphate aldolase OS=Candida albicans (strain WO-1) GN=CAWG_03619 PE=4 SV=1	CANAW	19
24	26.85	26.85	40.2	tr|C4YRU3|C4YRU3_CANAW	Adenosylhomocysteinase OS=Candida albicans (strain WO-1) GN=CAWG_04800 PE=3 SV=1	CANAW	16
25	26.32	26.32	66.7	tr|A0A0A6LP27|A0A0A6LP27_CANAL	Cofilin OS=Candida albicans (strain SC5314 / ATCC MYA-2876) GN=I503_04073 PE=4 SV=1	CANAL	18
26	26.15	26.15	55.5	tr|C4YCU4|C4YCU4_CANAW	60S ribosomal protein L2 OS=Candida albicans (strain WO-1) GN=CAWG_00328 PE=4 SV=1	CANAW	15
27	25.34	25.34	32	tr|Q59RQ6|Q59RQ6_CANAL	Dihydrolipoyl dehydrogenase OS=Candida albicans (strain SC5314 / ATCC MYA-2876) GN=LPD1 PE=4 SV=1	CANAL	13
28	24.37	24.37	11.5	tr|C4YNG3|C4YNG3_CANAW	Acetyl-CoA carboxylase OS=Candida albicans (strain WO-1) GN=CAWG_01423 PE=4 SV=1	CANAW	14
29	24.09	24.09	34.6	tr|A0A0A6MV26|A0A0A6MV26_CANAL	ATP synthase subunit alpha OS=Candida albicans (strain SC5314 / ATCC MYA-2876) GN=I503_00453 PE=3 SV=1	CANAL	12
30	24.05	24.05	68.5	tr|C4YTU2|C4YTU2_CANAW	Peptidyl-prolyl cis-trans isomerase OS=Candida albicans (strain WO-1) GN=CAWG_05587 PE=3 SV=1	CANAW	14
31	24.04	24.04	44.2	tr|C4YTI4|C4YTI4_CANAW	Uncharacterized protein OS=Candida albicans (strain WO-1) GN=CAWG_05477 PE=4 SV=1	CANAW	19
32	23.62	23.62	23	tr|C4YKZ8|C4YKZ8_CANAW	5-methyltetrahydropteroyltriglutamate-homocysteine methyltransferase OS=Candida albicans (strain WO-1) GN=CAWG_01512 PE=3 SV=1	CANAW	16
33	22.88	22.88	27	tr|C4YET9|C4YET9_CANAW	Polyadenylate-binding protein OS=Candida albicans (strain WO-1) GN=CAWG_01047 PE=3 SV=1	CANAW	12
34	22.65	22.65	26.8	tr|C4YE44|C4YE44_CANAW	Heat shock protein Hsp88 OS=Candida albicans (strain WO-1) GN=CAWG_00797 PE=3 SV=1	CANAW	14
35	21.76	21.76	27.6	tr|A0A0A6Q430|A0A0A6Q430_CANAL	Mannose-1-phosphate guanyltransferase OS=Candida albicans (strain SC5314 / ATCC MYA-2876) GN=I503_03301 PE=4 SV=1	CANAL	12
36	21.17	21.17	25.1	tr|A0A0A6PAW2|A0A0A6PAW2_CANAL	Pyruvate carboxylase OS=Candida albicans (strain SC5314 / ATCC MYA-2876) GN=W5Q_03664 PE=4 SV=1	CANAL	12
37	20.5	20.5	22.9	tr|C4YR46|C4YR46_CANAW	Elongation factor 3 OS=Candida albicans (strain WO-1) GN=CAWG_04545 PE=3 SV=1	CANAW	17
38	20.26	20.26	73.2	tr|C4YSV1|C4YSV1_CANAW	60S ribosomal protein L25 OS=Candida albicans (strain WO-1) GN=CAWG_05170 PE=3 SV=1	CANAW	14
39	19.47	19.47	25	tr|A0A0A6K7D7|A0A0A6K7D7_CANAX	Aconitate hydratase, mitochondrial OS=Candida albicans P76055 GN=MGO_06109 PE=4 SV=1	CANAX	11
40	19.14	19.14	25.6	tr|Q5ABC3|Q5ABC3_CANAL	Elongation factor Tu OS=Candida albicans (strain SC5314 / ATCC MYA-2876) GN=TUF1 PE=3 SV=1	CANAL	10
41	19.02	19.02	83.2	tr|Q5A389|Q5A389_CANAL	40S ribosomal protein S20 OS=Candida albicans (strain SC5314 / ATCC MYA-2876) GN=RPS20 PE=3 SV=1	CANAL	14
42	18.77	18.77	42.1	tr|Q59P43|Q59P43_CANAL	GTP-binding nuclear protein GSP1/Ran OS=Candida albicans (strain SC5314 / ATCC MYA-2876) GN=GSP1 PE=4 SV=1	CANAL	14
43	18.15	18.15	83.3	tr|A0A0A6PT84|A0A0A6PT84_CANAL	40S ribosomal protein S14 OS=Candida albicans (strain SC5314 / ATCC MYA-2876) GN=I503_00630 PE=3 SV=1	CANAL	15
44	18	18	31.2	tr|Q5AAM0|Q5AAM0_CANAL	Argininosuccinate synthase OS=Candida albicans (strain SC5314 / ATCC MYA-2876) GN=ARG1 PE=3 SV=1	CANAL	9
45	18	18	33.7	tr|C4YNZ5|C4YNZ5_CANAW	Peroxiredoxin TSA1 OS=Candida albicans (strain WO-1) GN=CAWG_02929 PE=4 SV=1	CANAW	12
46	17.62	47.81	37.5	tr|G9BX82|G9BX82_CANAX	Heat shock protein 70 OS=Candida albicans GN=hsp70 PE=3 SV=1	CANAX	34
47	16.1	16.1	11.6	tr|Q59SN3|Q59SN3_CANAL	Aspartate transcarbamylase OS=Candida albicans (strain SC5314 / ATCC MYA-2876) GN=URA2 PE=3 SV=1	CANAL	9
48	16.04	16.04	45.6	tr|A0A0A6Q3Z6|A0A0A6Q3Z6_CANAL	Triosephosphate isomerase OS=Candida albicans (strain SC5314 / ATCC MYA-2876) GN=I503_03254 PE=3 SV=1	CANAL	10
49	15.3	15.3	33.5	tr|Q59T44|Q59T44_CANAL	40S ribosomal protein S8 OS=Candida albicans (strain SC5314 / ATCC MYA-2876) GN=RPS8A PE=3 SV=1	CANAL	10
50	15.19	15.19	19.1	tr|Q59UR7|Q59UR7_CANAL	ATP synthase subunit beta OS=Candida albicans (strain SC5314 / ATCC MYA-2876) GN=ATP2 PE=3 SV=1	CANAL	8
51	15.01	15.01	26.6	tr|Q5A8X6|Q5A8X6_CANAL	Succinate-CoA ligase, alpha subunit OS=Candida albicans (strain SC5314 / ATCC MYA-2876) GN=LSC1 PE=3 SV=1	CANAL	9
52	15.01	15.01	36	tr|C4YHV4|C4YHV4_CANAW	40S ribosomal protein S6 OS=Candida albicans (strain WO-1) GN=CAWG_03657 PE=3 SV=1	CANAW	8
53	14.28	14.28	26.1	tr|Q5A9D9|Q5A9D9_CANAL	Homoisocitrate dehydrogenase, mitochondrial OS=Candida albicans (strain SC5314 / ATCC MYA-2876) GN=LYS12 PE=3 SV=1	CANAL	8
54	14	14	9	tr|Q5A750|Q5A750_CANAL	Transketolase OS=Candida albicans (strain SC5314 / ATCC MYA-2876) GN=TKL1 PE=3 SV=1	CANAL	8
55	14	14	17.7	tr|Q9UVM2|Q9UVM2_CANAX	O-acetylhomoserine O-acetylserine sulphydrylase OS=Candida albicans GN=MET15 PE=2 SV=1	CANAX	11
56	13.9	13.9	24.9	tr|Q59K50|Q59K50_CANAL	Acetyl-CoA acetyltransferase IB OS=Candida albicans (strain SC5314 / ATCC MYA-2876) GN=ERG10 PE=3 SV=1	CANAL	8
57	13.89	13.89	27.6	tr|A0A0A6L2W7|A0A0A6L2W7_CANAX	Cell division control protein 48 OS=Candida albicans P75010 GN=MGE_01057 PE=3 SV=1	CANAX	10
58	13.83	13.83	54.6	tr|Q5ADQ6|Q5ADQ6_CANAL	40S ribosomal protein S12 OS=Candida albicans (strain SC5314 / ATCC MYA-2876) GN=RPS12 PE=3 SV=1	CANAL	10
59	13.31	13.31	22.4	tr|A0A0A6K645|A0A0A6K645_CANAX	Acetyltransferase component of pyruvate dehydrogenase complex OS=Candida albicans P75010 GN=MGE_05077 PE=3 SV=1	CANAX	7
60	12.8	12.8	37.3	tr|Q59XR8|Q59XR8_CANAL	Likely mitochondrial ketol-acid reductoisomerase OS=Candida albicans (strain SC5314 / ATCC MYA-2876) GN=ILV5 PE=4 SV=1	CANAL	9
61	12.25	12.25	100	tr|C4YFC3|C4YFC3_CANAW	40S ribosomal protein S21 OS=Candida albicans (strain WO-1) GN=CAWG_01239 PE=3 SV=1	CANAW	17
62	12.19	12.19	29.5	tr|C4YKG1|C4YKG1_CANAW	Inorganic pyrophosphatase OS=Candida albicans (strain WO-1) GN=CAWG_05964 PE=4 SV=1	CANAW	8
63	12.14	12.14	34.2	tr|C4YLC1|C4YLC1_CANAW	Uncharacterized protein OS=Candida albicans (strain WO-1) GN=CAWG_01639 PE=3 SV=1	CANAW	6
64	12.09	12.09	34.3	tr|Q59Z66|Q59Z66_CANAL	Likely cytosolic ribosomal protein L11 OS=Candida albicans (strain SC5314 / ATCC MYA-2876) GN=RPL11 PE=3 SV=1	CANAL	12
65	12.04	12.04	26.5	tr|C4YFC5|C4YFC5_CANAW	Eukaryotic initiation factor 4A OS=Candida albicans (strain WO-1) GN=CAWG_01241 PE=3 SV=1	CANAW	11
66	12	12	10.7	tr|C4YEK7|C4YEK7_CANAW	Acetyl-coenzyme A synthetase OS=Candida albicans (strain WO-1) GN=CAWG_00964 PE=3 SV=1	CANAW	6
67	12	12	25.6	tr|Q5A7M9|Q5A7M9_CANAL	HAD hydrolase, family IA OS=Candida albicans (strain SC5314 / ATCC MYA-2876) GN=RHR2 PE=4 SV=1	CANAL	6
68	11.88	11.88	20	tr|C4YED0|C4YED0_CANAW	Phospho-2-dehydro-3-deoxyheptonate aldolase OS=Candida albicans (strain WO-1) GN=CAWG_00887 PE=3 SV=1	CANAW	6
69	11.82	11.82	36.8	tr|A0A0A6MTQ8|A0A0A6MTQ8_CANAL	60S ribosomal protein L27 OS=Candida albicans (strain SC5314 / ATCC MYA-2876) GN=I503_01209 PE=3 SV=1	CANAL	6
70	11.38	11.38	39.1	tr|Q59ZX4|Q59ZX4_CANAL	60S ribosomal protein L4-B OS=Candida albicans (strain SC5314 / ATCC MYA-2876) GN=RPL4B PE=4 SV=1	CANAL	9
71	10.85	10.85	95.5	tr|C4YTD8|C4YTD8_CANAW	40S ribosomal protein S28-A OS=Candida albicans (strain WO-1) GN=CAWG_05427 PE=3 SV=1	CANAW	7
72	10.75	10.75	71	sp|O94008|RL32_CANAX	60S ribosomal protein L32 OS=Candida albicans GN=RPL32 PE=3 SV=1	CANAX	6
73	10.71	10.71	40.9	tr|C4YEX2|C4YEX2_CANAW	40S ribosomal protein S16 OS=Candida albicans (strain WO-1) GN=CAWG_01081 PE=3 SV=1	CANAW	8
74	10.43	10.43	42	tr|Q5AB87|Q5AB87_CANAL	60S ribosomal protein L16-A OS=Candida albicans (strain SC5314 / ATCC MYA-2876) GN=RPL16A PE=3 SV=1	CANAL	6
75	10.4	10.4	61.5	tr|C4YIY9|C4YIY9_CANAW	60S ribosomal protein L38 OS=Candida albicans (strain WO-1) GN=CAWG_03801 PE=3 SV=1	CANAW	5
76	10.2	10.2	14	tr|Q5AGF6|Q5AGF6_CANAL	Eukaryotic translation initiation factor 2 subunit gamma OS=Candida albicans (strain SC5314 / ATCC MYA-2876) GN=GCD11 PE=4 SV=1	CANAL	6
77	10.01	10.01	41.1	tr|Q5A0V9|Q5A0V9_CANAL	Uncharacterized protein OS=Candida albicans (strain SC5314 / ATCC MYA-2876) GN=NOP1 PE=3 SV=1	CANAL	5
78	10	10	12.9	tr|Q9P8J2|Q9P8J2_CANAX	Inosine-5'-monophosphate dehydrogenase OS=Candida albicans GN=IMH3 PE=3 SV=1	CANAX	5
79	10	10	25.6	tr|Q5AKX0|Q5AKX0_CANAL	Uncharacterized protein OS=Candida albicans (strain SC5314 / ATCC MYA-2876) GN=ACT1 PE=3 SV=1	CANAL	5
80	10	10	22.3	tr|Q59L90|Q59L90_CANAL	Uncharacterized protein OS=Candida albicans (strain SC5314 / ATCC MYA-2876) GN=HET1 PE=4 SV=1	CANAL	6
81	10	10	40.2	tr|C4YSV6|C4YSV6_CANAW	Adenylate kinase OS=Candida albicans (strain WO-1) GN=ADK1 PE=3 SV=1	CANAW	6
82	9.98	9.98	44.8	tr|C4YHL4|C4YHL4_CANAW	Superoxide dismutase [Cu-Zn] OS=Candida albicans (strain WO-1) GN=CAWG_03562 PE=3 SV=1	Cu-Zn	7
83	9.89	9.89	18.6	tr|Q5A0S2|Q5A0S2_CANAL	Uncharacterized protein OS=Candida albicans (strain SC5314 / ATCC MYA-2876) GN=ALD5 PE=3 SV=1	CANAL	6
84	9.89	9.89	21.5	tr|Q59YC4|Q59YC4_CANAL	Potential cytosolic chaperonin CCT ring complex subunit Cct2 OS=Candida albicans (strain SC5314 / ATCC MYA-2876) GN=CCT2 PE=3 SV=1	CANAL	5
85	9.84	9.84	25.1	tr|Q59N00|Q59N00_CANAL	Likely cytosolic ribosomal protein S3 OS=Candida albicans (strain SC5314 / ATCC MYA-2876) GN=RPS3 PE=3 SV=1	CANAL	5
86	9.72	9.72	5.8	tr|Q5A4W7|Q5A4W7_CANAL	Fatty acid synthase subunit beta OS=Candida albicans (strain SC5314 / ATCC MYA-2876) GN=FAS1 PE=4 SV=1	CANAL	6
87	8.8	8.8	23.2	tr|A0A0A6P6Y2|A0A0A6P6Y2_CANAX	Glycyl-tRNA synthetase 1 OS=Candida albicans P75016 GN=MGI_00510 PE=3 SV=1	CANAX	6
88	8.58	8.58	46.6	tr|Q9P834|Q9P834_CANAX	60S ribosomal protein L6 OS=Candida albicans GN=RPL6 PE=2 SV=1	CANAX	5
89	8.49	8.49	26.6	tr|Q5A017|Q5A017_CANAL	Transaldolase OS=Candida albicans (strain SC5314 / ATCC MYA-2876) GN=TAL1 PE=3 SV=1	CANAL	5
90	8.45	8.45	38.6	tr|Q5AIB8|Q5AIB8_CANAL	60S ribosomal protein L10 OS=Candida albicans (strain SC5314 / ATCC MYA-2876) GN=RPL10 PE=4 SV=1	CANAL	5
91	8.27	16.41	28	tr|A0A0A6M4U4|A0A0A6M4U4_CANAL	Chaperone DnaK OS=Candida albicans (strain SC5314 / ATCC MYA-2876) GN=I503_01552 PE=3 SV=1	CANAL	16
92	8.21	8.21	58.4	tr|Q59TE0|Q59TE0_CANAL	60S ribosomal protein L17 OS=Candida albicans (strain SC5314 / ATCC MYA-2876) GN=RPL17B PE=3 SV=1	CANAL	5
93	8.19	8.19	15.1	tr|A0A0A6LH25|A0A0A6LH25_CANAX	Translation initiation factor 4G OS=Candida albicans P75016 GN=MGI_02250 PE=4 SV=1	CANAX	5
94	8.03	8.03	34	tr|Q5AAL2|Q5AAL2_CANAL	Ran-binding protein 1 OS=Candida albicans (strain SC5314 / ATCC MYA-2876) GN=YRB1 PE=4 SV=1	CANAL	4
95	8.02	8.02	17.4	tr|C4YM97|C4YM97_CANAW	Succinyl-CoA ligase subunit beta OS=Candida albicans (strain WO-1) GN=CAWG_01975 PE=3 SV=1	CANAW	4
96	8	8	67.3	tr|Q5AGU9|Q5AGU9_CANAL	Uncharacterized protein OS=Candida albicans (strain SC5314 / ATCC MYA-2876) GN=HSP12 PE=4 SV=1	CANAL	4
97	8	8	37.6	tr|Q5AJ93|Q5AJ93_CANAL	40S ribosomal protein S7-A OS=Candida albicans (strain SC5314 / ATCC MYA-2876) GN=RPS7A PE=4 SV=1	CANAL	5
98	8	8	6.4	tr|Q5A7T3|Q5A7T3_CANAL	Uncharacterized protein OS=Candida albicans (strain SC5314 / ATCC MYA-2876) GN=PMA1 PE=3 SV=1	CANAL	4
99	8	8	21.1	tr|Q5A6R1|Q5A6R1_CANAL	Ribosomal protein L15 OS=Candida albicans (strain SC5314 / ATCC MYA-2876) GN=RPL15A PE=3 SV=1	CANAL	7
100	7.72	7.72	20.6	tr|A0A0A6I0H0|A0A0A6I0H0_CANAX	Methionine-tRNA ligase, beta subunit OS=Candida albicans P76067 GN=MGQ_05620 PE=4 SV=1	CANAX	4
101	7.52	7.52	44.6	tr|A0A0A6MR63|A0A0A6MR63_CANAX	60S ribosomal protein L43 OS=Candida albicans P75010 GN=MGE_04377 PE=3 SV=1	CANAX	4
102	7.51	7.51	14.5	tr|Q59US9|Q59US9_CANAL	Uncharacterized protein OS=Candida albicans (strain SC5314 / ATCC MYA-2876) GN=CAR2 PE=3 SV=1	CANAL	4
103	7.48	7.48	39.7	tr|A0A0A6MTU0|A0A0A6MTU0_CANAL	Large subunit ribosomal protein L14e OS=Candida albicans (strain SC5314 / ATCC MYA-2876) GN=I503_01283 PE=4 SV=1	CANAL	4
104	7.34	7.34	43	tr|Q5AML4|Q5AML4_CANAL	60S ribosomal protein L20 OS=Candida albicans (strain SC5314 / ATCC MYA-2876) GN=RPL20B PE=3 SV=1	CANAL	6
105	7.18	7.18	33.3	tr|A0A0A6MZ13|A0A0A6MZ13_CANAX	40S ribosomal protein S30 OS=Candida albicans P75016 GN=MGI_05693 PE=4 SV=1	CANAX	7
106	7.12	7.12	22.7	tr|A0A0A6NJH5|A0A0A6NJH5_CANAX	40S ribosomal protein S1 OS=Candida albicans P75010 GN=RPS1 PE=3 SV=1	CANAX	4
107	7.05	7.05	21.5	tr|C4YD77|C4YD77_CANAW	Isocitrate dehydrogenase [NAD] subunit, mitochondrial OS=Candida albicans (strain WO-1) GN=CAWG_00467 PE=3 SV=1	NAD	4
108	6.98	6.98	18.2	tr|A0A0A6LX12|A0A0A6LX12_CANAL	V-type proton ATPase subunit B OS=Candida albicans (strain SC5314 / ATCC MYA-2876) GN=I503_05994 PE=3 SV=1	CANAL	3
109	6.7	6.7	28.4	tr|Q5A5A0|Q5A5A0_CANAL	Likely thioredoxin peroxidase OS=Candida albicans (strain SC5314 / ATCC MYA-2876) GN=PRX1 PE=4 SV=1	CANAL	4
110	6.69	6.7	13	tr|Q5A3K7|Q5A3K7_CANAL	D-3-phosphoglycerate dehydrogenase 1 OS=Candida albicans (strain SC5314 / ATCC MYA-2876) GN=SER33 PE=3 SV=1	CANAL	4
111	6.68	59.04	63	tr|Q5AKI5|Q5AKI5_CANAL	Uncharacterized protein OS=Candida albicans (strain SC5314 / ATCC MYA-2876) GN=ADH1 PE=3 SV=1	CANAL	44
112	6.6	6.6	15.8	tr|Q5AJY2|Q5AJY2_CANAL	Dihydroxy-acid dehydratase, mitochondrial OS=Candida albicans (strain SC5314 / ATCC MYA-2876) GN=ILV3 PE=3 SV=1	CANAL	3
113	6.51	6.51	53.9	tr|C4YQH1|C4YQH1_CANAW	Uncharacterized protein OS=Candida albicans (strain WO-1) GN=CAWG_02729 PE=4 SV=1	CANAW	4
114	6.49	6.49	15.3	tr|Q5A5V6|Q5A5V6_CANAL	Pyruvate dehydrogenase E1 component subunit beta, mitochondrial OS=Candida albicans (strain SC5314 / ATCC MYA-2876) GN=PDB1 PE=4 SV=1	CANAL	4
115	6.35	6.35	43.4	tr|C4YI82|C4YI82_CANAW	60S ribosomal protein L36 OS=Candida albicans (strain WO-1) GN=CAWG_04154 PE=3 SV=1	CANAW	4
116	6.15	6.15	6.8	tr|Q5A6R2|Q5A6R2_CANAL	Bifunctional purine biosynthesis protein ADE17 OS=Candida albicans (strain SC5314 / ATCC MYA-2876) GN=ADE17 PE=3 SV=1	CANAL	4
117	6.11	6.11	10.7	tr|A0A0A6LMV3|A0A0A6LMV3_CANAX	ATP-dependent 6-phosphofructokinase OS=Candida albicans P60002 GN=MEW_05083 PE=3 SV=1	CANAX	3
118	6.06	6.06	57.1	tr|A0A0A4CY57|A0A0A4CY57_CANAX	40S ribosomal protein S25-A OS=Candida albicans P57055 GN=MGK_04292 PE=4 SV=1	CANAX	4
119	6.06	6.06	8.5	tr|Q5AAJ1|Q5AAJ1_CANAL	3-isopropylmalate dehydratase OS=Candida albicans (strain SC5314 / ATCC MYA-2876) GN=LEU1 PE=3 SV=1	CANAL	4
120	6.03	6.03	19.7	tr|Q59W67|Q59W67_CANAL	S-adenosylmethionine synthase OS=Candida albicans (strain SC5314 / ATCC MYA-2876) GN=SAM2 PE=3 SV=1	CANAL	4
121	6.01	6.01	29.8	tr|Q5AG43|Q5AG43_CANAL	40S ribosomal protein OS=Candida albicans (strain SC5314 / ATCC MYA-2876) GN=RPS5 PE=3 SV=1	CANAL	3
122	6	8	38.9	tr|Q5A786|Q5A786_CANAL	Profilin OS=Candida albicans (strain SC5314 / ATCC MYA-2876) GN=PFY1 PE=3 SV=1	CANAL	5
123	6	6	6.9	tr|Q5AAZ3|Q5AAZ3_CANAL	Likely glutamate synthase OS=Candida albicans (strain SC5314 / ATCC MYA-2876) GN=GLT1 PE=4 SV=1	CANAL	3
124	6	6	24.8	tr|A0A0A4DSR3|A0A0A4DSR3_CANAX	Uncharacterized protein OS=Candida albicans P57055 GN=MGK_01381 PE=4 SV=1	CANAX	4
125	6	6	21	tr|Q59R18|Q59R18_CANAL	Asparaginyl-tRNA synthetase, cytoplasmic OS=Candida albicans (strain SC5314 / ATCC MYA-2876) GN=DED81 PE=3 SV=1	CANAL	3
126	6	6	31.4	tr|C4YQK4|C4YQK4_CANAW	Ribosomal protein L19 OS=Candida albicans (strain WO-1) GN=CAWG_02763 PE=3 SV=1	CANAW	3
127	6	6	24.1	tr|C4YHU4|C4YHU4_CANAW	Acetolactate synthase small subunit, mitochondrial OS=Candida albicans (strain WO-1) GN=CAWG_03647 PE=4 SV=1	CANAW	3
128	6	6	10.1	tr|Q5AK53|Q5AK53_CANAL	ATP-dependent 6-phosphofructokinase OS=Candida albicans (strain SC5314 / ATCC MYA-2876) GN=PFK1 PE=3 SV=1	CANAL	3
129	6	6	12.6	tr|Q5A678|Q5A678_CANAL	Uncharacterized protein OS=Candida albicans (strain SC5314 / ATCC MYA-2876) GN=SSZ1 PE=3 SV=1	CANAL	3
130	6	6	16.1	tr|Q59ZZ5|Q59ZZ5_CANAL	Citrate synthase OS=Candida albicans (strain SC5314 / ATCC MYA-2876) GN=CIT1 PE=3 SV=1	CANAL	3
131	6	6	12.5	tr|Q59UF7|Q59UF7_CANAL	Aspartyl-tRNA synthetase, cytoplasmic OS=Candida albicans (strain SC5314 / ATCC MYA-2876) GN=DPS1-1 PE=3 SV=1	CANAL	3
132	6	6	9.3	tr|Q5AJZ6|Q5AJZ6_CANAL	Uncharacterized protein OS=Candida albicans (strain SC5314 / ATCC MYA-2876) GN=RIB5 PE=4 SV=1	CANAL	3
133	6	6	21.4	tr|C4YNQ0|C4YNQ0_CANAW	40S ribosomal protein S19-B OS=Candida albicans (strain WO-1) GN=CAWG_02832 PE=4 SV=1	CANAW	5
134	6	6	26.8	tr|C4YN67|C4YN67_CANAW	Eukaryotic translation initiation factor 4E OS=Candida albicans (strain WO-1) GN=CAWG_02307 PE=3 SV=1	CANAW	3
135	5.83	5.83	27.9	tr|C4YSU4|C4YSU4_CANAW	NADH-cytochrome b5 reductase OS=Candida albicans (strain WO-1) GN=CAWG_05163 PE=3 SV=1	CANAW	3
136	5.51	5.51	29.8	tr|A0A0A6M963|A0A0A6M963_CANAL	Eukaryotic translation initiation factor 5A OS=Candida albicans (strain SC5314 / ATCC MYA-2876) GN=I503_04723 PE=3 SV=1	CANAL	5
137	5.49	5.49	26.6	tr|A0A0A6L8T9|A0A0A6L8T9_CANAX	Branched-chain-amino-acid aminotransferase OS=Candida albicans P75016 GN=MGI_02986 PE=3 SV=1	CANAX	3
138	5.47	5.47	17.6	tr|Q5AF44|Q5AF44_CANAL	Alkyl hydroperoxide reductase 1 OS=Candida albicans (strain SC5314 / ATCC MYA-2876) GN=AHP1 PE=4 SV=1	CANAL	3
139	5.42	5.42	29.2	tr|Q5AMP4|Q5AMP4_CANAL	Malate dehydrogenase OS=Candida albicans (strain SC5314 / ATCC MYA-2876) GN=MDH1-1 PE=3 SV=1	CANAL	4
140	5.38	5.38	25.4	tr|C4YE15|C4YE15_CANAW	40S ribosomal protein S22-A OS=Candida albicans (strain WO-1) GN=CAWG_00765 PE=3 SV=1	CANAW	5
141	5.09	5.09	9.9	tr|Q5AED0|Q5AED0_CANAL	Uncharacterized protein OS=Candida albicans (strain SC5314 / ATCC MYA-2876) GN=CaO19.338 PE=4 SV=1	CANAL	3
142	5.08	5.08	8.4	tr|Q5ADU2|Q5ADU2_CANAL	Lysine--tRNA ligase OS=Candida albicans (strain SC5314 / ATCC MYA-2876) GN=KRS1 PE=3 SV=1	CANAL	4
143	4.98	4.98	28.2	tr|A0A0A4BLZ0|A0A0A4BLZ0_CANAX	Phosphoribosylaminoimidazole-succinocarboxamide synthase OS=Candida albicans P75063 GN=MGM_05358 PE=3 SV=1	CANAX	3
144	4.86	4.86	9.7	tr|A0A0A6PG62|A0A0A6PG62_CANAX	V-type proton ATPase catalytic subunit A OS=Candida albicans P78042 GN=MGS_02608 PE=3 SV=1	CANAX	3
145	4.82	4.82	10	tr|Q5A1E8|Q5A1E8_CANAL	Succinate dehydrogenase [ubiquinone] flavoprotein subunit, mitochondrial OS=Candida albicans (strain SC5314 / ATCC MYA-2876) GN=SDH12 PE=4 SV=1	CANAL	3
146	4.77	10.17	30.2	tr|C4YDJ7|C4YDJ7_CANAW	Alcohol dehydrogenase II OS=Candida albicans (strain WO-1) GN=CAWG_00592 PE=3 SV=1	CANAW	12
147	4.61	4.61	17.5	tr|A0A0A6KAA0|A0A0A6KAA0_CANAX	Translation initiation factor 4B OS=Candida albicans P75010 GN=MGE_04617 PE=4 SV=1	CANAX	2
148	4.58	4.58	12.6	tr|Q5ALM0|Q5ALM0_CANAL	Aspartate-semialdehyde dehydrogenase OS=Candida albicans (strain SC5314 / ATCC MYA-2876) GN=HOM2 PE=1 SV=1	CANAL	3
149	4.51	4.51	5.5	tr|C4YTK2|C4YTK2_CANAW	Eukaryotic translation initiation factor 3 subunit B OS=Candida albicans (strain WO-1) GN=PRT1 PE=3 SV=1	CANAW	2
150	4.47	4.47	6.9	tr|A0A0A6NLB3|A0A0A6NLB3_CANAX	Pentafunctional AROM polypeptide OS=Candida albicans P75016 GN=MGI_03312 PE=3 SV=1	CANAX	2
151	4.45	4.45	18.9	tr|Q8NKG1|Q8NKG1_CANAX	Glycerol-3-phosphate dehydrogenase [NAD(+)] OS=Candida albicans PE=3 SV=1	NAD(+)	2
152	4.42	4.42	21.3	tr|C4YJX1|C4YJX1_CANAW	60S ribosomal protein L21-A OS=Candida albicans (strain WO-1) GN=CAWG_04142 PE=4 SV=1	CANAW	2
153	4.37	4.37	6.7	tr|Q5A7A0|Q5A7A0_CANAL	Phosphoribosylamine-glycine ligase OS=Candida albicans (strain SC5314 / ATCC MYA-2876) GN=ADE5,7 PE=3 SV=1	CANAL	3
154	4.36	4.36	11.4	tr|Q5ACS3|Q5ACS3_CANAL	Nucleolar protein 56 OS=Candida albicans (strain SC5314 / ATCC MYA-2876) GN=SIK1 PE=4 SV=1	CANAL	3
155	4.34	4.34	19.3	tr|A0A0A6P843|A0A0A6P843_CANAL	Elongation factor 1-beta OS=Candida albicans (strain SC5314 / ATCC MYA-2876) GN=I503_03745 PE=3 SV=1	CANAL	4
156	4.29	4.29	49.5	tr|A0A0A6M618|A0A0A6M618_CANAL	60S ribosomal protein L33-A OS=Candida albicans (strain SC5314 / ATCC MYA-2876) GN=I503_02013 PE=4 SV=1	CANAL	3
157	4.2	4.2	11.1	tr|Q5AIA2|Q5AIA2_CANAL	Homoserine dehydrogenase OS=Candida albicans (strain SC5314 / ATCC MYA-2876) GN=HOM6 PE=3 SV=1	CANAL	4
158	4.19	4.19	14.3	tr|C4YI53|C4YI53_CANAW	ATP-dependent RNA helicase SUB2 OS=Candida albicans (strain WO-1) GN=CAWG_03761 PE=4 SV=1	CANAW	4
159	4.09	4.09	11.3	tr|Q59LB4|Q59LB4_CANAL	Threonyl-tRNA synthetase, cytoplasmic OS=Candida albicans (strain SC5314 / ATCC MYA-2876) GN=THS1 PE=3 SV=1	CANAL	3
160	4.07	4.07	25.2	tr|Q5A0M1|Q5A0M1_CANAL	Isocitrate dehydrogenase [NAD] subunit, mitochondrial OS=Candida albicans (strain SC5314 / ATCC MYA-2876) GN=IDH2 PE=3 SV=1	NAD	2
161	4.04	4.04	12	tr|C4YDY3|C4YDY3_CANAW	Catalase OS=Candida albicans (strain WO-1) GN=CAWG_00732 PE=3 SV=1	CANAW	2
162	4.04	4.04	12.7	tr|C4YIQ7|C4YIQ7_CANAW	Isocitrate dehydrogenase [NADP] OS=Candida albicans (strain WO-1) GN=CAWG_04333 PE=3 SV=1	NADP	2
163	4.01	4.01	21.3	tr|C4YEM6|C4YEM6_CANAW	Putative uncharacterized protein OS=Candida albicans (strain WO-1) GN=CAWG_00983 PE=4 SV=1	CANAW	2
164	4	5.59	21.7	tr|Q5ALQ9|Q5ALQ9_CANAL	Uncharacterized protein OS=Candida albicans (strain SC5314 / ATCC MYA-2876) GN=ARO3 PE=4 SV=1	CANAL	4
165	4	4	14.5	tr|A0A0A6NJQ0|A0A0A6NJQ0_CANAX	Ribosome biogenesis protein ERB1 OS=Candida albicans P75010 GN=ERB1 PE=3 SV=1	CANAX	2
166	4	4	7.8	tr|Q96W69|Q96W69_CANAX	Heat shock protein Hsp104 OS=Candida albicans GN=HSP104 PE=3 SV=1	CANAX	2
167	4	4	35.8	tr|Q5AG68|Q5AG68_CANAL	Nucleoside diphosphate kinase OS=Candida albicans (strain SC5314 / ATCC MYA-2876) GN=YNK1 PE=3 SV=1	CANAL	3
168	4	4	27.7	tr|Q5A6A1|Q5A6A1_CANAL	60S ribosomal protein L24 OS=Candida albicans (strain SC5314 / ATCC MYA-2876) GN=RPL24A PE=4 SV=1	CANAL	2
169	4	4	8.1	tr|Q59PT2|Q59PT2_CANAL	Potential mitochondrial aconitase OS=Candida albicans (strain SC5314 / ATCC MYA-2876) GN=ACO2 PE=4 SV=1	CANAL	2
170	4	4	23.8	tr|C4YF22|C4YF22_CANAW	Phosphomannomutase OS=Candida albicans (strain WO-1) GN=CAWG_01133 PE=3 SV=1	CANAW	3
171	4	4	11.5	tr|C4YCY6|C4YCY6_CANAW	Centromere/microtubule-binding protein CBF5 OS=Candida albicans (strain WO-1) GN=CAWG_00372 PE=4 SV=1	CANAW	2
172	4	4	9.5	tr|A0A0A6MJA8|A0A0A6MJA8_CANAL	Acetyl-CoA hydrolase OS=Candida albicans (strain SC5314 / ATCC MYA-2876) GN=I503_04229 PE=4 SV=1	CANAL	2
173	4	4	8.5	tr|A0A0A6JB33|A0A0A6JB33_CANAX	Hexokinase OS=Candida albicans P37039 GN=MGC_05792 PE=3 SV=1	CANAX	2
174	4	4	29.5	tr|Q59YD2|Q59YD2_CANAL	Uncharacterized protein OS=Candida albicans (strain SC5314 / ATCC MYA-2876) GN=CaO19.1394 PE=4 SV=1	CANAL	2
175	4	4	13.1	tr|C4YN44|C4YN44_CANAW	S-(hydroxymethyl)glutathione dehydrogenase OS=Candida albicans (strain WO-1) GN=CAWG_02284 PE=3 SV=1	CANAW	2
176	4	4	20.1	tr|C4YEV4|C4YEV4_CANAW	Protein BMH2 OS=Candida albicans (strain WO-1) GN=CAWG_01062 PE=3 SV=1	CANAW	2
177	4	4	18.9	tr|C4YDX8|C4YDX8_CANAW	Putative uncharacterized protein OS=Candida albicans (strain WO-1) GN=CAWG_00726 PE=4 SV=1	CANAW	2
178	4	4	24.2	tr|A0A0A4A5W5|A0A0A4A5W5_CANAX	40S ribosomal protein S11 (Fragment) OS=Candida albicans P87 GN=MEQ_04072 PE=3 SV=1	CANAX	2
179	4	4	5.1	tr|Q5AJV7|Q5AJV7_CANAL	Acetolactate synthase OS=Candida albicans (strain SC5314 / ATCC MYA-2876) GN=ILV2 PE=3 SV=1	CANAL	2
180	4	4	6.1	tr|Q5AFX4|Q5AFX4_CANAL	T-complex protein 1 subunit delta OS=Candida albicans (strain SC5314 / ATCC MYA-2876) GN=CCT4 PE=3 SV=1	CANAL	2
181	4	4	5.4	tr|Q5AFQ4|Q5AFQ4_CANAL	60S acidic ribosomal protein P0 OS=Candida albicans (strain SC5314 / ATCC MYA-2876) GN=RPP0 PE=3 SV=1	CANAL	2
182	4	4	21.4	tr|Q5A5P8|Q5A5P8_CANAL	Eukaryotic translation initiation factor 1A OS=Candida albicans (strain SC5314 / ATCC MYA-2876) GN=TIF11 PE=3 SV=1	CANAL	3
183	4	4	8.1	tr|Q59KP4|Q59KP4_CANAL	Glutamate dehydrogenase OS=Candida albicans (strain SC5314 / ATCC MYA-2876) GN=GDH3 PE=3 SV=1	CANAL	2
184	4	4	12.6	tr|C4YEZ6|C4YEZ6_CANAW	Eukaryotic translation initiation factor 3 subunit I OS=Candida albicans (strain WO-1) GN=TIF34 PE=3 SV=1	CANAW	2
185	3.96	4	9	tr|Q5AC80|Q5AC80_CANAL	Uncharacterized protein OS=Candida albicans (strain SC5314 / ATCC MYA-2876) GN=ADO1 PE=4 SV=1	CANAL	2
186	3.92	4	5.9	tr|Q5AFL1|Q5AFL1_CANAL	Glutamate-tRNA ligase OS=Candida albicans (strain SC5314 / ATCC MYA-2876) GN=CaO19.7057 PE=3 SV=1	CANAL	2
187	3.77	3.77	16	tr|Q59V92|Q59V92_CANAL	Potential HSP40 family chaperone OS=Candida albicans (strain SC5314 / ATCC MYA-2876) GN=SIS1 PE=4 SV=1	CANAL	2
188	3.52	3.52	58.9	tr|C4YGY4|C4YGY4_CANAW	60S ribosomal protein L30 OS=Candida albicans (strain WO-1) GN=CAWG_03325 PE=4 SV=1	CANAW	3
189	3.51	3.52	8.3	tr|C4YSD4|C4YSD4_CANAW	Serine hydroxymethyltransferase OS=Candida albicans (strain WO-1) GN=CAWG_04997 PE=3 SV=1	CANAW	2
190	3.4	3.4	2	tr|C4YLA4|C4YLA4_CANAW	Uncharacterized protein OS=Candida albicans (strain WO-1) GN=CAWG_01621 PE=4 SV=1	CANAW	2
191	3.32	3.32	11.6	tr|Q59LN7|Q59LN7_CANAL	2-oxoglutarate dehydrogenase, mitochondrial OS=Candida albicans (strain SC5314 / ATCC MYA-2876) GN=KGD1 PE=4 SV=1	CANAL	2
192	3.23	3.23	6.7	tr|Q5AAG7|Q5AAG7_CANAL	Uncharacterized protein OS=Candida albicans (strain SC5314 / ATCC MYA-2876) GN=CaO19.7522 PE=3 SV=1	CANAL	2
193	3.21	3.21	12	tr|Q5A2T2|Q5A2T2_CANAL	ABC transporter ATP-binding protein ARB1 OS=Candida albicans (strain SC5314 / ATCC MYA-2876) GN=KRE30 PE=3 SV=1	CANAL	3
194	3.18	3.18	10.6	tr|Q5AAF6|Q5AAF6_CANAL	Uncharacterized protein OS=Candida albicans (strain SC5314 / ATCC MYA-2876) GN=MIS1 PE=3 SV=1	CANAL	2
195	2.94	2.94	17.1	tr|Q59KX4|Q59KX4_CANAL	Likely rab family GTP-binding protein OS=Candida albicans (strain SC5314 / ATCC MYA-2876) GN=YPT31 PE=3 SV=1	CANAL	2
196	2.82	2.82	10.6	tr|Q5AIA6|Q5AIA6_CANAL	Pyridoxine biosynthesis protein SNZ1 OS=Candida albicans (strain SC5314 / ATCC MYA-2876) GN=SNZ1 PE=3 SV=1	CANAL	2
197	2.79	2.79	3.5	tr|Q59MZ5|Q59MZ5_CANAL	Phosphoribosylformylglycinamidine synthase OS=Candida albicans (strain SC5314 / ATCC MYA-2876) GN=ADE6 PE=3 SV=1	CANAL	2
198	2.78	2.78	8.2	tr|C4YL77|C4YL77_CANAW	Uncharacterized protein OS=Candida albicans (strain WO-1) GN=CAWG_01593 PE=3 SV=1	CANAW	3
199	2.69	2.69	22.2	tr|Q5AAZ6|Q5AAZ6_CANAL	Likely cytosolic ribosomal protein S23 OS=Candida albicans (strain SC5314 / ATCC MYA-2876) GN=RPS23A PE=3 SV=1	CANAL	2
200	2.58	2.58	11.1	tr|C4YF49|C4YF49_CANAW	Putative uncharacterized protein OS=Candida albicans (strain WO-1) GN=CAWG_01160 PE=3 SV=1	CANAW	3
201	2.46	2.46	6.2	tr|Q5A9Z5|Q5A9Z5_CANAL	Uncharacterized protein OS=Candida albicans (strain SC5314 / ATCC MYA-2876) GN=KAP123 PE=4 SV=1	CANAL	2
202	2.43	2.43	33.6	tr|A0A0A6MHY3|A0A0A6MHY3_CANAX	60S ribosomal protein L7 OS=Candida albicans P78042 GN=MGS_00555 PE=4 SV=1	CANAX	2
203	2.41	2.41	9.4	tr|Q5AFA8|Q5AFA8_CANAL	Uncharacterized protein OS=Candida albicans (strain SC5314 / ATCC MYA-2876) GN=ABP1 PE=4 SV=1	CANAL	2
204	2.4	2.4	7	tr|C4YEV7|C4YEV7_CANAW	Putative uncharacterized protein (Fragment) OS=Candida albicans (strain WO-1) GN=CAWG_01065 PE=4 SV=1	CANAW	3
205	2.39	2.39	4.7	tr|Q5A8Z3|Q5A8Z3_CANAL	Likely Arginyl tRNA synthetase OS=Candida albicans (strain SC5314 / ATCC MYA-2876) GN=CaO19.10849 PE=3 SV=1	CANAL	2
206	2.31	2.31	13	tr|C4YCM1|C4YCM1_CANAW	Putative uncharacterized protein OS=Candida albicans (strain WO-1) GN=CAWG_00255 PE=4 SV=1	CANAW	1
207	2.21	2.21	11.4	tr|Q5A958|Q5A958_CANAL	Potential secondary alcohol dehydrogenase OS=Candida albicans (strain SC5314 / ATCC MYA-2876) GN=ADH5 PE=3 SV=1	CANAL	1
208	2.13	2.13	12.9	tr|C4YRG9|C4YRG9_CANAW	Uncharacterized protein OS=Candida albicans (strain WO-1) GN=CAWG_04668 PE=4 SV=1	CANAW	1
209	2.13	2.13	9	tr|Q5AEJ9|Q5AEJ9_CANAL	Potential serine tRNA synthetase OS=Candida albicans (strain SC5314 / ATCC MYA-2876) GN=SES1 PE=3 SV=1	CANAL	1
210	2.07	2.07	8.3	tr|Q9HGT2|Q9HGT2_CANAX	Cytosolic leucyl-tRNA synthetase OS=Candida albicans GN=CDC60 PE=4 SV=1	CANAX	1
211	2.07	2.07	19.9	tr|A0A0A6LUX1|A0A0A6LUX1_CANAL	Chorismate synthase OS=Candida albicans (strain SC5314 / ATCC MYA-2876) GN=I503_06178 PE=3 SV=1	CANAL	1
212	2.05	2.05	11.2	tr|A0A0A6L5E5|A0A0A6L5E5_CANAX	Aminopeptidase 2 OS=Candida albicans P75010 GN=MGE_00432 PE=4 SV=1	CANAX	1
213	2.03	2.03	3.5	tr|A0A0A6PER7|A0A0A6PER7_CANAL	Phosphoribosylaminoimidazole carboxylase OS=Candida albicans (strain SC5314 / ATCC MYA-2876) GN=I503_02955 PE=3 SV=1	CANAL	1
214	2.02	2.02	20.5	tr|A0A0A6LLZ6|A0A0A6LLZ6_CANAX	Eukaryotic translation initiation factor 3 subunit A OS=Candida albicans P75016 GN=TIF32 PE=3 SV=1	CANAX	1
215	2.01	2.01	7.1	sp|Q12572|LYS2_CANAX	L-aminoadipate-semialdehyde dehydrogenase large subunit OS=Candida albicans GN=LYS2 PE=3 SV=2	CANAX	1
216	2.01	2.01	8.1	tr|C4YSD8|C4YSD8_CANAW	Alanine--tRNA ligase OS=Candida albicans (strain WO-1) GN=ALA1 PE=3 SV=1	CANAW	1
217	2.01	2.01	12.3	tr|Q5A126|Q5A126_CANAL	Uncharacterized protein OS=Candida albicans (strain SC5314 / ATCC MYA-2876) GN=SMY2 PE=4 SV=1	CANAL	1
218	2.01	2.01	8.5	tr|A0A0A6NU86|A0A0A6NU86_CANAX	Uncharacterized protein OS=Candida albicans P78042 GN=MGS_04723 PE=4 SV=1	CANAX	1
219	2.01	2.01	11.6	tr|C4YMT5|C4YMT5_CANAW	Protein GCD14 OS=Candida albicans (strain WO-1) GN=CAWG_02172 PE=4 SV=1	CANAW	1
220	2.01	2.01	13.1	tr|C4YMC7|C4YMC7_CANAW	Eukaryotic translation initiation factor 6 OS=Candida albicans (strain WO-1) GN=TIF6 PE=3 SV=1	CANAW	1
221	2.01	2.01	19.7	tr|Q5A4P6|Q5A4P6_CANAL	Potential heat shock protein regulator OS=Candida albicans (strain SC5314 / ATCC MYA-2876) GN=HCH1 PE=4 SV=1	CANAL	1
222	2	16.18	34	tr|A0A0A6PRL7|A0A0A6PRL7_CANAL	40S ribosomal protein S4 OS=Candida albicans (strain SC5314 / ATCC MYA-2876) GN=W5Q_00155 PE=3 SV=1	CANAL	9
223	2	2	11.7	tr|Q59U50|Q59U50_CANAL	DNA helicase OS=Candida albicans (strain SC5314 / ATCC MYA-2876) GN=MCM3 PE=3 SV=1	CANAL	1
224	2	2	8.2	tr|A0A0A6JQI4|A0A0A6JQI4_CANAX	Uncharacterized protein OS=Candida albicans P60002 GN=MEW_03121 PE=4 SV=1	CANAX	1
225	2	2	7.4	tr|Q59XW4|Q59XW4_CANAL	Acetyl-coenzyme A synthetase OS=Candida albicans (strain SC5314 / ATCC MYA-2876) GN=ACS1 PE=3 SV=1	CANAL	1
226	2	2	2.9	tr|C4YFS0|C4YFS0_CANAW	Putative uncharacterized protein OS=Candida albicans (strain WO-1) GN=CAWG_00046 PE=4 SV=1	CANAW	1
227	2	2	7.2	tr|A0A0A6MU68|A0A0A6MU68_CANAL	Protein transporter SEC24 OS=Candida albicans (strain SC5314 / ATCC MYA-2876) GN=I503_00849 PE=4 SV=1	CANAL	1
228	2	2	25.1	tr|Q5ALM6|Q5ALM6_CANAL	Peptidyl-prolyl cis-trans isomerase OS=Candida albicans (strain SC5314 / ATCC MYA-2876) GN=CPR3 PE=3 SV=1	CANAL	3
229	2	2	4	tr|Q5ALE6|Q5ALE6_CANAL	Likely 26S proteasome regulatory particle subunit Rpn1p OS=Candida albicans (strain SC5314 / ATCC MYA-2876) GN=RPN1 PE=4 SV=1	CANAL	1
230	2	2	11.2	tr|Q5AGE6|Q5AGE6_CANAL	Uncharacterized protein OS=Candida albicans (strain SC5314 / ATCC MYA-2876) GN=THR4 PE=4 SV=1	CANAL	1
231	2	2	3.2	tr|Q5A782|Q5A782_CANAL	Translation initiation factor aIF-2 OS=Candida albicans (strain SC5314 / ATCC MYA-2876) GN=FUN12 PE=4 SV=1	CANAL	1
232	2	2	4.5	tr|Q5A6Y3|Q5A6Y3_CANAL	Uncharacterized protein OS=Candida albicans (strain SC5314 / ATCC MYA-2876) GN=NCL1 PE=4 SV=1	CANAL	1
233	2	2	11.2	tr|Q5A474|Q5A474_CANAL	Aspartokinase OS=Candida albicans (strain SC5314 / ATCC MYA-2876) GN=HOM3 PE=3 SV=1	CANAL	1
234	2	2	8.2	tr|Q5A253|Q5A253_CANAL	Phosphoglucomutase OS=Candida albicans (strain SC5314 / ATCC MYA-2876) GN=PGM2 PE=3 SV=1	CANAL	1
235	2	2	12.1	tr|Q5A0X3|Q5A0X3_CANAL	Likely 26S proteasome regulatory particle ATPase Rpt5p OS=Candida albicans (strain SC5314 / ATCC MYA-2876) GN=RPT5 PE=3 SV=1	CANAL	1
236	2	2	8.4	tr|Q59Z12|Q59Z12_CANAL	Potential cytosolic chaperonin CCT ring complex subunit Cct5 OS=Candida albicans (strain SC5314 / ATCC MYA-2876) GN=CCT5 PE=3 SV=1	CANAL	1
237	2	2	19.6	tr|G1UAM5|G1UAM5_CANAX	Potential membrane protein OS=Candida albicans GN=Ca20C1.19 PE=4 SV=1	CANAX	1
238	2	2	10.7	tr|A0A0A6MIU7|A0A0A6MIU7_CANAX	Uncharacterized protein OS=Candida albicans P78042 GN=MGS_00178 PE=4 SV=1	CANAX	1
239	2	2	12.3	tr|A0A0A6M9S7|A0A0A6M9S7_CANAL	Transcriptional repressor TUP1 OS=Candida albicans (strain SC5314 / ATCC MYA-2876) GN=I503_00005 PE=4 SV=1	CANAL	1
240	2	2	6.7	tr|Q9HF93|Q9HF93_CANAX	Prp20p OS=Candida albicans GN=PRP20 PE=4 SV=1	CANAX	1
241	2	2	6	tr|Q5AJS1|Q5AJS1_CANAL	Ran GTPase-activating protein 1 OS=Candida albicans (strain SC5314 / ATCC MYA-2876) GN=RNA1 PE=4 SV=1	CANAL	1
242	2	2	7.6	tr|Q5AC45|Q5AC45_CANAL	Uncharacterized protein OS=Candida albicans (strain SC5314 / ATCC MYA-2876) GN=CaO19.13072 PE=4 SV=1	CANAL	1
243	2	2	5.4	tr|Q5ABP4|Q5ABP4_CANAL	Serine/threonine-protein phosphatase OS=Candida albicans (strain SC5314 / ATCC MYA-2876) GN=CMP1 PE=3 SV=1	CANAL	1
244	2	2	2.8	tr|Q5ABF9|Q5ABF9_CANAL	Potential Sin3.Rpd3 histone deacetylase complex component Sin3p OS=Candida albicans (strain SC5314 / ATCC MYA-2876) GN=SIN3 PE=4 SV=1	CANAL	1
245	2	2	7	tr|Q5AAJ0|Q5AAJ0_CANAL	Nicotinamide-nucleotide adenylyltransferase OS=Candida albicans (strain SC5314 / ATCC MYA-2876) GN=CaO19.7499 PE=3 SV=1	CANAL	1
246	2	2	12.8	tr|Q5A9E1|Q5A9E1_CANAL	GrpE protein homolog OS=Candida albicans (strain SC5314 / ATCC MYA-2876) GN=MGE1 PE=3 SV=1	CANAL	1
247	2	2	22.5	tr|Q5A8Z9|Q5A8Z9_CANAL	Plasma membrane protein OS=Candida albicans (strain SC5314 / ATCC MYA-2876) GN=CaO19.10846 PE=4 SV=1	CANAL	1
248	2	2	2.9	tr|Q5A8A6|Q5A8A6_CANAL	Likely carbamoyl-phosphate synthetase large subunit OS=Candida albicans (strain SC5314 / ATCC MYA-2876) GN=CPA2 PE=4 SV=1	CANAL	1
249	2	2	6.9	tr|Q5A6Z6|Q5A6Z6_CANAL	Chaperone DnaJ OS=Candida albicans (strain SC5314 / ATCC MYA-2876) GN=YDJ1 PE=3 SV=1	CANAL	1
250	2	2	17.5	tr|Q5A4Q0|Q5A4Q0_CANAL	Uncharacterized protein OS=Candida albicans (strain SC5314 / ATCC MYA-2876) GN=DOG1 PE=4 SV=1	CANAL	1
251	2	2	3.3	tr|Q5A0N3|Q5A0N3_CANAL	Ribonucleoside-diphosphate reductase OS=Candida albicans (strain SC5314 / ATCC MYA-2876) GN=RNR1 PE=3 SV=1	CANAL	1
252	2	2	7.7	tr|Q59VG1|Q59VG1_CANAL	Homocitrate synthase, mitochondrial OS=Candida albicans (strain SC5314 / ATCC MYA-2876) GN=LYS21 PE=3 SV=1	CANAL	1
253	2	2	5.2	tr|Q59QB7|Q59QB7_CANAL	Potential cytosolic chaperonin CCT ring complex subunit Tcp1 OS=Candida albicans (strain SC5314 / ATCC MYA-2876) GN=TCP1 PE=3 SV=1	CANAL	1
254	2	2	15.6	tr|Q59N73|Q59N73_CANAL	Uncharacterized protein OS=Candida albicans (strain SC5314 / ATCC MYA-2876) GN=GUK1 PE=3 SV=1	CANAL	1
255	2	2	5.4	tr|Q3MPF7|Q3MPF7_CANAX	Coronin OS=Candida albicans GN=CaJ7.0212 PE=3 SV=1	CANAX	1
256	2	2	13.7	tr|C4YTV5|C4YTV5_CANAW	Peptidyl-prolyl cis-trans isomerase OS=Candida albicans (strain WO-1) GN=CAWG_05601 PE=4 SV=1	CANAW	1
257	2	2	10.5	tr|C4YQN5|C4YQN5_CANAW	Uncharacterized protein OS=Candida albicans (strain WO-1) GN=CAWG_02794 PE=4 SV=1	CANAW	1
258	2	2	15.9	tr|C4YDA4|C4YDA4_CANAW	Putative uncharacterized protein OS=Candida albicans (strain WO-1) GN=CAWG_00494 PE=4 SV=1	CANAW	1
259	2	2	7.4	tr|A0A0A6NS12|A0A0A6NS12_CANAX	Uncharacterized protein (Fragment) OS=Candida albicans P78042 GN=MGS_04870 PE=4 SV=1	CANAX	1
260	2	2	6.6	tr|A0A0A6L0X2|A0A0A6L0X2_CANAX	Phosphoserine aminotransferase OS=Candida albicans P76055 GN=MGO_02006 PE=3 SV=1	CANAX	1
261	2	2	7	tr|A0A0A6KB61|A0A0A6KB61_CANAX	Threonine dehydratase OS=Candida albicans P37039 GN=MGC_02015 PE=3 SV=1	CANAX	1
262	2	2	2	tr|Q9UVA1|Q9UVA1_CANAX	DNA-directed RNA polymerase (Fragment) OS=Candida albicans GN=RPB2 PE=3 SV=1	CANAX	1
263	2	2	5.2	tr|Q9UV13|Q9UV13_CANAX	Diphosphomevalonate decarboxylase MVD1 OS=Candida albicans GN=MVD1 PE=2 SV=1	CANAX	1
264	2	2	35.5	tr|Q9P457|Q9P457_CANAX	Cu-binding metallothionein OS=Candida albicans GN=CRD2 PE=4 SV=1	CANAX	1
265	2	2	6.7	tr|Q9HEN9|Q9HEN9_CANAX	Putative centromer binding factor 1 OS=Candida albicans GN=cbf1 PE=4 SV=1	CANAX	1
266	2	2	10.1	tr|Q5ALV6|Q5ALV6_CANAL	40S ribosomal protein S26-B OS=Candida albicans (strain SC5314 / ATCC MYA-2876) GN=RPS26A PE=4 SV=1	CANAL	1
267	2	2	3.9	tr|Q5AL34|Q5AL34_CANAL	Mannose-1-phosphate guanylyltransferase OS=Candida albicans (strain SC5314 / ATCC MYA-2876) GN=PSA2 PE=4 SV=1	CANAL	1
268	2	2	10.5	tr|Q5AH35|Q5AH35_CANAL	Possible mitochondrial ribosomal large subunit protein MRP49p OS=Candida albicans (strain SC5314 / ATCC MYA-2876) GN=MRP49 PE=4 SV=1	CANAL	1
269	2	2	7.9	tr|Q5AF97|Q5AF97_CANAL	Uncharacterized protein OS=Candida albicans (strain SC5314 / ATCC MYA-2876) GN=GLC8 PE=4 SV=1	CANAL	1
270	2	2	3.8	tr|Q5ADR2|Q5ADR2_CANAL	Glutamate-5-semialdehyde dehydrogenase OS=Candida albicans (strain SC5314 / ATCC MYA-2876) GN=PRO2 PE=3 SV=1	CANAL	1
271	2	2	6.7	tr|Q5AD52|Q5AD52_CANAL	cAMP-dependent protein kinase regulatory subunit OS=Candida albicans (strain SC5314 / ATCC MYA-2876) GN=CaO19.2015 PE=3 SV=1	CANAL	1
272	2	2	1.9	tr|Q5AB17|Q5AB17_CANAL	Likely protein kinase OS=Candida albicans (strain SC5314 / ATCC MYA-2876) GN=NPR1 PE=3 SV=1	CANAL	1
273	2	2	2.8	tr|Q5AB04|Q5AB04_CANAL	Uncharacterized protein OS=Candida albicans (strain SC5314 / ATCC MYA-2876) GN=CaO19.6245 PE=4 SV=1	CANAL	1
274	2	2	7.6	tr|Q5A900|Q5A900_CANAL	40S ribosomal protein S2 OS=Candida albicans (strain SC5314 / ATCC MYA-2876) GN=RPS21 PE=3 SV=1	CANAL	1
275	2	2	6	tr|Q5A653|Q5A653_CANAL	Uncharacterized protein OS=Candida albicans (strain SC5314 / ATCC MYA-2876) GN=CaO19.11317 PE=4 SV=1	CANAL	1
276	2	2	2.7	tr|Q5A5F2|Q5A5F2_CANAL	Likely protein disulfide isomerase OS=Candida albicans (strain SC5314 / ATCC MYA-2876) GN=PDI1 PE=4 SV=1	CANAL	1
277	2	2	2.8	tr|Q5A362|Q5A362_CANAL	Cystathionine gamma-lyase OS=Candida albicans (strain SC5314 / ATCC MYA-2876) GN=CYS3 PE=3 SV=1	CANAL	1
278	2	2	12.7	tr|Q59ZS3|Q59ZS3_CANAL	Potential polyamine N-acetyl tranferase (GNAT family) OS=Candida albicans (strain SC5314 / ATCC MYA-2876) GN=PAA11 PE=4 SV=1	CANAL	1
279	2	2	15.1	tr|Q59WG0|Q59WG0_CANAL	Uncharacterized protein OS=Candida albicans (strain SC5314 / ATCC MYA-2876) GN=HNT1 PE=4 SV=1	CANAL	1
280	2	2	2.3	tr|Q59UT2|Q59UT2_CANAL	Uncharacterized protein OS=Candida albicans (strain SC5314 / ATCC MYA-2876) GN=HIS4 PE=3 SV=1	CANAL	1
281	2	2	7.3	tr|Q59US1|Q59US1_CANAL	Pyrroline-5-carboxylate reductase OS=Candida albicans (strain SC5314 / ATCC MYA-2876) GN=PRO3 PE=3 SV=1	CANAL	1
282	2	2	0.6	tr|Q59LW3|Q59LW3_CANAL	DNA-directed RNA polymerase OS=Candida albicans (strain SC5314 / ATCC MYA-2876) GN=RPA190 PE=3 SV=1	CANAL	1
283	2	2	8.1	tr|C4YKB0|C4YKB0_CANAW	Protein YOP1 OS=Candida albicans (strain WO-1) GN=CAWG_05907 PE=3 SV=1	CANAW	1
284	2	2	14.6	tr|C4YCW2|C4YCW2_CANAW	40S ribosomal protein S17-B OS=Candida albicans (strain WO-1) GN=CAWG_00346 PE=3 SV=1	CANAW	1
285	2	2	20.7	tr|A0A0A6PGY8|A0A0A6PGY8_CANAL	Mitochondrial import inner membrane translocase subunit TIM9 OS=Candida albicans (strain SC5314 / ATCC MYA-2876) GN=I503_05356 PE=4 SV=1	CANAL	3
286	2	2	6.5	tr|A0A0A6M031|A0A0A6M031_CANAL	40S ribosomal protein S0 OS=Candida albicans (strain SC5314 / ATCC MYA-2876) GN=RPS0 PE=3 SV=1	CANAL	2
287	1.82	2	2.6	tr|Q5A934|Q5A934_CANAL	Likely ZPR1 zinc finger protein OS=Candida albicans (strain SC5314 / ATCC MYA-2876) GN=ZPR1 PE=4 SV=1	CANAL	1
288	1.82	2	3.6	tr|Q5A7Q7|Q5A7Q7_CANAL	Conserved uncharacterized protein OS=Candida albicans (strain SC5314 / ATCC MYA-2876) GN=IST1 PE=4 SV=1	CANAL	1
289	1.77	1.77	26.7	tr|C4YQP9|C4YQP9_CANAW	60S ribosomal protein L35 OS=Candida albicans (strain WO-1) GN=CAWG_02808 PE=3 SV=1	CANAW	1
290	1.74	1.77	9.3	tr|Q5A7I3|Q5A7I3_CANAL	Nicotinate-nucleotide pyrophosphorylase [carboxylating] OS=Candida albicans (strain SC5314 / ATCC MYA-2876) GN=CaO19.5054 PE=3 SV=1	CANAL	1
291	1.7	1.7	9.5	tr|C4YDY8|C4YDY8_CANAW	Putative uncharacterized protein OS=Candida albicans (strain WO-1) GN=CAWG_00737 PE=4 SV=1	CANAW	1
292	1.68	1.7	1.6	tr|Q59JY3|Q59JY3_CANAL	Probable valyl-tRNA synthetase OS=Candida albicans (strain SC5314 / ATCC MYA-2876) GN=VAS1 PE=3 SV=1	CANAL	1
293	1.65	1.65	15.9	tr|Q59PD0|Q59PD0_CANAL	Likely mitochondrial ribosomal protein L15 OS=Candida albicans (strain SC5314 / ATCC MYA-2876) GN=MRPL151 PE=4 SV=1	CANAL	1
294	1.62	1.62	14.4	tr|Q5AB74|Q5AB74_CANAL	Potential cytosolic chaperonin CCT ring complex subunit Cct8 OS=Candida albicans (strain SC5314 / ATCC MYA-2876) GN=CCT8 PE=3 SV=1	CANAL	1
295	1.48	1.48	4.8	tr|Q5A0L0|Q5A0L0_CANAL	Ribonucleoside-diphosphate reductase small chain OS=Candida albicans (strain SC5314 / ATCC MYA-2876) GN=RNR21 PE=4 SV=1	CANAL	1
296	1.44	1.44	5.8	tr|C4YJX2|C4YJX2_CANAW	40S ribosomal protein S9-B OS=Candida albicans (strain WO-1) GN=CAWG_04143 PE=3 SV=1	CANAW	1
297	1.43	1.43	2.7	tr|Q5AFK6|Q5AFK6_CANAL	DNA-directed RNA polymerase OS=Candida albicans (strain SC5314 / ATCC MYA-2876) GN=RPA135 PE=3 SV=1	CANAL	1
298	1.41	1.41	19.2	tr|A0A0A6LSR5|A0A0A6LSR5_CANAX	40S ribosomal protein S13 OS=Candida albicans P60002 GN=MEW_04463 PE=3 SV=1	CANAX	1
299	1.38	1.38	11.6	tr|A0A0A4C179|A0A0A4C179_CANAX	Cytidyltransferase-like domain-containing protein OS=Candida albicans P57055 GN=MGK_03316 PE=4 SV=1	CANAX	1
300	1.38	1.38	11.1	tr|Q59VH9|Q59VH9_CANAL	Obg-like ATPase 1 OS=Candida albicans (strain SC5314 / ATCC MYA-2876) GN=OLA1 PE=3 SV=1	CANAL	2
301	1.34	1.34	4.9	tr|Q59PN3|Q59PN3_CANAL	Uncharacterized protein OS=Candida albicans (strain SC5314 / ATCC MYA-2876) GN=CaO19.1338 PE=4 SV=1	CANAL	1
302	1.32	1.32	46.1	tr|Q59M73|Q59M73_CANAL	60S ribosomal protein L23 OS=Candida albicans (strain SC5314 / ATCC MYA-2876) GN=RPL23A PE=3 SV=1	CANAL	2
303	1.26	1.26	3.9	tr|Q59XE4|Q59XE4_CANAL	Uncharacterized protein OS=Candida albicans (strain SC5314 / ATCC MYA-2876) GN=NRD1 PE=4 SV=1	CANAL	1
304	1.22	1.22	10.6	tr|C4YD90|C4YD90_CANAW	GMP synthase OS=Candida albicans (strain WO-1) GN=CAWG_00480 PE=3 SV=1	CANAW	1
305	1.22	1.22	5.1	tr|Q59ZT0|Q59ZT0_CANAL	Rab GDP-dissociation inhibitor OS=Candida albicans (strain SC5314 / ATCC MYA-2876) GN=GDI1 PE=4 SV=1	CANAL	1
306	1.2	1.2	2.6	tr|Q5ADA2|Q5ADA2_CANAL	Uncharacterized protein OS=Candida albicans (strain SC5314 / ATCC MYA-2876) GN=ARO8 PE=4 SV=1	CANAL	1
307	1.11	1.11	6.3	tr|Q59V07|Q59V07_CANAL	Isocitrate dehydrogenase [NADP] OS=Candida albicans (strain SC5314 / ATCC MYA-2876) GN=IDP2 PE=3 SV=1	NADP	1
308	1.07	1.07	12.3	tr|C4YQF1|C4YQF1_CANAW	Histone H2B OS=Candida albicans (strain WO-1) GN=CAWG_02708 PE=3 SV=1	CANAW	1
309	1.06	1.06	2.6	tr|C4YDH1|C4YDH1_CANAW	Translation initiation factor eIF-2B epsilon subunit OS=Candida albicans (strain WO-1) GN=CAWG_00566 PE=4 SV=1	CANAW	1
310	0.96	0.96	2.2	RRRRRtr|Q5AI02|Q5AI02_CANAL	REVERSED Potential ARF GAP OS=Candida albicans (strain SC5314 / ATCC MYA-2876) GN=AGE1 PE=4 SV=1	CANAL	1
311	0.8	0.8	16.6	tr|Q5AF98|Q5AF98_CANAL	Potential ribosome-associated chaperone OS=Candida albicans (strain SC5314 / ATCC MYA-2876) GN=ZUO1 PE=4 SV=1	CANAL	1
312	0.75	0.75	6.8	tr|Q5A7P9|Q5A7P9_CANAL	Peroxiredoxin Q/BCP OS=Candida albicans (strain SC5314 / ATCC MYA-2876) GN=DOT5 PE=4 SV=1	CANAL	1
313	0.73	0.73	18.3	tr|Q59U62|Q59U62_CANAL	Uncharacterized protein OS=Candida albicans (strain SC5314 / ATCC MYA-2876) GN=CaO19.1889 PE=4 SV=1	CANAL	2
314	0.61	0.61	5.6	tr|A0A0A6L5Q8|A0A0A6L5Q8_CANAX	tRNA ligase OS=Candida albicans P78042 GN=MGS_05174 PE=4 SV=1	CANAX	1
315	0.57	0.57	3.7	tr|C4YHT4|C4YHT4_CANAW	Eukaryotic translation initiation factor 3 subunit C OS=Candida albicans (strain WO-1) GN=NIP1 PE=3 SV=1	CANAW	1
316	0.46	0.46	4.6	tr|Q59V82|Q59V82_CANAL	Adenylosuccinate lyase OS=Candida albicans (strain SC5314 / ATCC MYA-2876) GN=ADE13 PE=3 SV=1	CANAL	1
317	0.39	0.39	6.8	tr|Q5A3Y7|Q5A3Y7_CANAL	Uncharacterized protein OS=Candida albicans (strain SC5314 / ATCC MYA-2876) GN=CaO19.7322 PE=4 SV=1	CANAL	1
318	0.38	0.38	6.3	tr|Q5A3X4|Q5A3X4_CANAL	Uncharacterized protein OS=Candida albicans (strain SC5314 / ATCC MYA-2876) GN=PRE8 PE=4 SV=1	CANAL	1
319	0.35	0.35	2.4	tr|C4YD88|C4YD88_CANAW	Ribosome biogenesis protein YTM1 OS=Candida albicans (strain WO-1) GN=YTM1 PE=3 SV=1	CANAW	1
320	0.34	0.34	7.6	tr|A0A0A6M6H9|A0A0A6M6H9_CANAL	Uncharacterized protein OS=Candida albicans (strain SC5314 / ATCC MYA-2876) GN=W5Q_01719 PE=4 SV=1	CANAL	1
321	0.34	0.34	1.2	RRRRRtr|Q59SM6|Q59SM6_CANAL	REVERSED Uncharacterized protein OS=Candida albicans (strain SC5314 / ATCC MYA-2876) GN=CaO19.2366 PE=4 SV=1	CANAL	1
322	0.32	0.32	18.4	tr|Q5AJZ5|Q5AJZ5_CANAL	Proteasome component C11 OS=Candida albicans (strain SC5314 / ATCC MYA-2876) GN=PRE1 PE=3 SV=1	CANAL	1
323	0.31	0.31	1.9	tr|Q5ADJ4|Q5ADJ4_CANAL	Uncharacterized protein OS=Candida albicans (strain SC5314 / ATCC MYA-2876) GN=NIC96 PE=4 SV=1	CANAL	1
324	0.28	0.28	3.5	tr|C4YGH2|C4YGH2_CANAW	Putative uncharacterized protein OS=Candida albicans (strain WO-1) GN=CAWG_03149 PE=4 SV=1	CANAW	1
325	0.27	0.27	11.9	tr|Q59LA1|Q59LA1_CANAL	Likely mitochondrial ribosomal protein L1 OS=Candida albicans (strain SC5314 / ATCC MYA-2876) GN=MRPL1 PE=4 SV=1	CANAL	1
326	0.26	0.26	4.2	RRRRRtr|A0A0A6KH53|A0A0A6KH53_CANAX	REVERSED Uncharacterized protein OS=Candida albicans P75010 GN=MGE_03819 PE=4 SV=1	CANAX	1
327	0.26	0.26	12.2	tr|Q5ANH6|Q5ANH6_CANAL	Likely cytosolic ribosomal protein S15 OS=Candida albicans (strain SC5314 / ATCC MYA-2876) GN=RPS15 PE=3 SV=1	CANAL	1
328	0.25	0.25	2.5	tr|Q5ACG6|Q5ACG6_CANAL	D-xylulose reductase OS=Candida albicans (strain SC5314 / ATCC MYA-2876) GN=XYL2 PE=3 SV=1	CANAL	1
329	0.24	0.24	3.9	tr|Q5AKJ7|Q5AKJ7_CANAL	Uncharacterized protein OS=Candida albicans (strain SC5314 / ATCC MYA-2876) GN=PPR1 PE=4 SV=1	CANAL	1
330	0.24	0.24	8.8	tr|Q59KV8|Q59KV8_CANAL	Possible sphingolipid long chain base sensory protein OS=Candida albicans (strain SC5314 / ATCC MYA-2876) GN=LSP1 PE=4 SV=1	CANAL	1
331	0.24	0.24	2.2	tr|C4YDF1|C4YDF1_CANAW	Putative uncharacterized protein OS=Candida albicans (strain WO-1) GN=CAWG_00545 PE=4 SV=1	CANAW	1
332	0.23	0.23	7.9	tr|Q5AKV3|Q5AKV3_CANAL	6-phosphogluconate dehydrogenase, decarboxylating OS=Candida albicans (strain SC5314 / ATCC MYA-2876) GN=GND1 PE=3 SV=1	CANAL	1
333	0.21	0.21	2.1	tr|Q5ABB0|Q5ABB0_CANAL	ATP-binding cassette protein OS=Candida albicans (strain SC5314 / ATCC MYA-2876) GN=GCN20 PE=3 SV=1	CANAL	0
334	0.16	0.16	1.4	tr|Q5AK72|Q5AK72_CANAL	Potential YTA7-like ATPase OS=Candida albicans (strain SC5314 / ATCC MYA-2876) GN=YTA7 PE=3 SV=1	CANAL	0
335	0.16	0.16	2.8	tr|Q59ZG6|Q59ZG6_CANAL	Likely nucleolar ribosomal biogenesis factor RPF2p OS=Candida albicans (strain SC5314 / ATCC MYA-2876) GN=RPF2 PE=4 SV=1	CANAL	0
336	0.15	0.15	3.5	tr|Q5AMS1|Q5AMS1_CANAL	Uncharacterized protein OS=Candida albicans (strain SC5314 / ATCC MYA-2876) GN=CaO19.12044 PE=4 SV=1	CANAL	0
337	0.15	0.15	6.2	tr|Q59RP8|Q59RP8_CANAL	Uncharacterized protein OS=Candida albicans (strain SC5314 / ATCC MYA-2876) GN=TID3 PE=4 SV=1	CANAL	0
338	0.14	0.14	3	tr|A0A0A6NX42|A0A0A6NX42_CANAX	FKBP12-rapamycin complex-associated protein OS=Candida albicans P75016 GN=MGI_02114 PE=4 SV=1	CANAX	0
339	0.14	0.14	13.1	tr|C4YPB7|C4YPB7_CANAW	Fumarate hydratase, mitochondrial OS=Candida albicans (strain WO-1) GN=CAWG_03070 PE=3 SV=1	CANAW	0
340	0.13	0.14	7.4	tr|Q5AGZ7|Q5AGZ7_CANAL	60S ribosomal protein L5 OS=Candida albicans (strain SC5314 / ATCC MYA-2876) GN=RPL5 PE=3 SV=1	CANAL	0
341	0.13	0.13	4.8	tr|A0A0A3Y186|A0A0A3Y186_CANAX	Alpha-1,6-mannosyltransferase OS=Candida albicans 12C GN=MEK_05228 PE=4 SV=1	CANAX	1
342	0.13	0.13	4.3	tr|Q5ANP6|Q5ANP6_CANAL	Potential single-stranded nucleic acid binding protein OS=Candida albicans (strain SC5314 / ATCC MYA-2876) GN=SBP1 PE=4 SV=1	CANAL	0
343	0.12	0.12	1.7	tr|A0A0A6JNT1|A0A0A6JNT1_CANAX	Uncharacterized protein OS=Candida albicans P37039 GN=MGC_04714 PE=4 SV=1	CANAX	1
344	0.11	0.11	2.3	tr|Q5AAP3|Q5AAP3_CANAL	Uncharacterized protein OS=Candida albicans (strain SC5314 / ATCC MYA-2876) GN=CaO19.13647 PE=4 SV=1	CANAL	0
345	0.11	0.11	18.1	tr|Q5A9J8|Q5A9J8_CANAL	Uncharacterized protein OS=Candida albicans (strain SC5314 / ATCC MYA-2876) GN=CaO19.10099 PE=4 SV=1	CANAL	0
346	0.11	0.11	3.2	tr|Q59YX6|Q59YX6_CANAL	Uncharacterized protein OS=Candida albicans (strain SC5314 / ATCC MYA-2876) GN=STI1 PE=4 SV=1	CANAL	0
347	0.1	0.1	6	tr|C4YSS4|C4YSS4_CANAW	Ribosomal protein OS=Candida albicans (strain WO-1) GN=CAWG_05143 PE=3 SV=1	CANAW	0
348	0.09	0.09	5.4	RRRRRtr|Q5AFQ5|Q5AFQ5_CANAL	REVERSED Uncharacterized protein OS=Candida albicans (strain SC5314 / ATCC MYA-2876) GN=CaO19.7013 PE=4 SV=1	CANAL	0
349	0.08	0.08	43.3	RRRRRtr|Q5ADM7|Q5ADM7_CANAL	REVERSED Glyceraldehyde-3-phosphate dehydrogenase OS=Candida albicans (strain SC5314 / ATCC MYA-2876) GN=TDH3 PE=3 SV=1	CANAL	1
350	0.08	0.08	1.5	tr|Q59SP6|Q59SP6_CANAL	Uncharacterized protein OS=Candida albicans (strain SC5314 / ATCC MYA-2876) GN=LIN1 PE=4 SV=1	CANAL	0
351	0.07	0.07	3.4	tr|Q5A955|Q5A955_CANAL	DNA helicase OS=Candida albicans (strain SC5314 / ATCC MYA-2876) GN=MCM6 PE=3 SV=1	CANAL	1
352	0.07	0.07	8.6	tr|A0A0A6K4N2|A0A0A6K4N2_CANAX	Phosphoacetylglucosamine mutase OS=Candida albicans P60002 GN=MEW_01335 PE=3 SV=1	CANAX	0
353	0.06	0.06	3.2	tr|Q59R31|Q59R31_CANAL	Argininosuccinate lyase OS=Candida albicans (strain SC5314 / ATCC MYA-2876) GN=ARG4 PE=3 SV=1	CANAL	0
354	0.05	0.05	3.3	tr|A0A0A6JAR8|A0A0A6JAR8_CANAX	IQ domain-containing protein containing GTPase activating protein OS=Candida albicans P60002 GN=MEW_05087 PE=4 SV=1	CANAX	1
355	0.05	0.05	7	tr|Q5A3N1|Q5A3N1_CANAL	Uncharacterized protein OS=Candida albicans (strain SC5314 / ATCC MYA-2876) GN=CaO19.12703 PE=4 SV=1	CANAL	0
356	0.05	0.05	4.3	RRRRRtr|A0A0A6P990|A0A0A6P990_CANAX	REVERSED Carnitine O-acetyltransferase, mitochondrial OS=Candida albicans P78042 GN=MGS_03449 PE=3 SV=1	CANAX	0
357	0.05	0.05	3	tr|Q5AAU7|Q5AAU7_CANAL	Eukaryotic translation initiation factor 2 subunit alpha OS=Candida albicans (strain SC5314 / ATCC MYA-2876) GN=SUI2 PE=4 SV=1	CANAL	0
358	0.05	0.05	2.9	tr|Q59S20|Q59S20_CANAL	Uncharacterized protein OS=Candida albicans (strain SC5314 / ATCC MYA-2876) GN=CaO19.8776 PE=4 SV=1	CANAL	0

## Sheet: Uninduced Replicate 1 Peptides
N	Unused	Total	%Cov	%Cov(50)	%Cov(95)	Accessions	Names	Used	Annotation	Contrib	Conf	Sequence	Modifications	Cleavages	dMass	Prec MW	Prec m/z	Theor MW	Theor m/z	Theor z	Sc	Spectrum	Specific	Time	PrecursorSignal	PrecursorElution
1	93.17	93.17	63.97	63.97	63.97	tr|C4YDJ3|C4YDJ3_CANAW; tr|A0A0A6Q741|A0A0A6Q741_CANAL; tr|A0A0A6M7H0|A0A0A6M7H0_CANAL; tr|A0A0A6M386|A0A0A6M386_CANAX; tr|A0A0A6LGT0|A0A0A6LGT0_CANAX; tr|A0A0A6L5Y0|A0A0A6L5Y0_CANAX; tr|A0A0A6L1C0|A0A0A6L1C0_CANAX; tr|A0A0A6KWM0|A0A0A6KWM0_CANAX; tr|A0A0A6K9D4|A0A0A6K9D4_CANAX; tr|A0A0A6K455|A0A0A6K455_CANAX; tr|A0A0A6JWU4|A0A0A6JWU4_CANAX; tr|A0A0A6J9A0|A0A0A6J9A0_CANAX; tr|A0A0A6J199|A0A0A6J19…	Elongation factor 1-alpha OS=Candida albicans (strain WO-1) GN=CAWG_00588 PE=3 SV=1; Elongation factor 1-alpha OS=Candida albicans (strain SC5314 / ATCC MYA-2876) GN=I503_00814 PE=3 SV=1; Elongation factor 1-alpha OS=Candida albicans (strain SC5314 / ATCC MYA-2876) GN=W5Q_02251 PE=3 SV=1; Elongation factor 1-alpha OS=Candida albicans P78042 GN=MGS_00808 PE=3 SV=1; Elongation factor 1-alpha OS=Can…			2	99	AGMVVTFAPAGVTTEVK	Oxidation(M)@3		0.00210375	1692.88	847.446	1692.88	847.445	2	17	1.1.1.1942.18	1	23.7211	18427.6	23.4873
1	93.17	93.17	63.97	63.97	63.97	tr|C4YDJ3|C4YDJ3_CANAW; tr|A0A0A6Q741|A0A0A6Q741_CANAL; tr|A0A0A6M7H0|A0A0A6M7H0_CANAL; tr|A0A0A6M386|A0A0A6M386_CANAX; tr|A0A0A6LGT0|A0A0A6LGT0_CANAX; tr|A0A0A6L5Y0|A0A0A6L5Y0_CANAX; tr|A0A0A6L1C0|A0A0A6L1C0_CANAX; tr|A0A0A6KWM0|A0A0A6KWM0_CANAX; tr|A0A0A6K9D4|A0A0A6K9D4_CANAX; tr|A0A0A6K455|A0A0A6K455_CANAX; tr|A0A0A6JWU4|A0A0A6JWU4_CANAX; tr|A0A0A6J9A0|A0A0A6J9A0_CANAX; tr|A0A0A6J199|A0A0A6J19…	Elongation factor 1-alpha OS=Candida albicans (strain WO-1) GN=CAWG_00588 PE=3 SV=1; Elongation factor 1-alpha OS=Candida albicans (strain SC5314 / ATCC MYA-2876) GN=I503_00814 PE=3 SV=1; Elongation factor 1-alpha OS=Candida albicans (strain SC5314 / ATCC MYA-2876) GN=W5Q_02251 PE=3 SV=1; Elongation factor 1-alpha OS=Candida albicans P78042 GN=MGS_00808 PE=3 SV=1; Elongation factor 1-alpha OS=Can…			2	99	DGQTREHALLAYTLGVK		missed R-E@5	-0.000618146	1870.99	624.67	1870.99	624.671	3	19	1.1.1.1970.10	1	24.8304	3929.18	24.6492
1	93.17	93.17	63.97	63.97	63.97	tr|C4YDJ3|C4YDJ3_CANAW; tr|A0A0A6Q741|A0A0A6Q741_CANAL; tr|A0A0A6M7H0|A0A0A6M7H0_CANAL; tr|A0A0A6M386|A0A0A6M386_CANAX; tr|A0A0A6LGT0|A0A0A6LGT0_CANAX; tr|A0A0A6L5Y0|A0A0A6L5Y0_CANAX; tr|A0A0A6L1C0|A0A0A6L1C0_CANAX; tr|A0A0A6KWM0|A0A0A6KWM0_CANAX; tr|A0A0A6K9D4|A0A0A6K9D4_CANAX; tr|A0A0A6K455|A0A0A6K455_CANAX; tr|A0A0A6JWU4|A0A0A6JWU4_CANAX; tr|A0A0A6J9A0|A0A0A6J9A0_CANAX; tr|A0A0A6J199|A0A0A6J19…	Elongation factor 1-alpha OS=Candida albicans (strain WO-1) GN=CAWG_00588 PE=3 SV=1; Elongation factor 1-alpha OS=Candida albicans (strain SC5314 / ATCC MYA-2876) GN=I503_00814 PE=3 SV=1; Elongation factor 1-alpha OS=Candida albicans (strain SC5314 / ATCC MYA-2876) GN=W5Q_02251 PE=3 SV=1; Elongation factor 1-alpha OS=Candida albicans P78042 GN=MGS_00808 PE=3 SV=1; Elongation factor 1-alpha OS=Can…			2	99	DMRQTVAVGVIKSVEKSDK	Oxidation(M)@2	missed R-Q@3; missed K-S@12; missed K-S@16	-0.00304137	2105.11	527.285	2105.11	527.286	4	15	1.1.1.1810.10	1	18.457	2130.3	18.3557
1	93.17	93.17	63.97	63.97	63.97	tr|C4YDJ3|C4YDJ3_CANAW; tr|A0A0A6Q741|A0A0A6Q741_CANAL; tr|A0A0A6M7H0|A0A0A6M7H0_CANAL; tr|A0A0A6M386|A0A0A6M386_CANAX; tr|A0A0A6LGT0|A0A0A6LGT0_CANAX; tr|A0A0A6L5Y0|A0A0A6L5Y0_CANAX; tr|A0A0A6L1C0|A0A0A6L1C0_CANAX; tr|A0A0A6KWM0|A0A0A6KWM0_CANAX; tr|A0A0A6K9D4|A0A0A6K9D4_CANAX; tr|A0A0A6K455|A0A0A6K455_CANAX; tr|A0A0A6JWU4|A0A0A6JWU4_CANAX; tr|A0A0A6J9A0|A0A0A6J9A0_CANAX; tr|A0A0A6J199|A0A0A6J19…	Elongation factor 1-alpha OS=Candida albicans (strain WO-1) GN=CAWG_00588 PE=3 SV=1; Elongation factor 1-alpha OS=Candida albicans (strain SC5314 / ATCC MYA-2876) GN=I503_00814 PE=3 SV=1; Elongation factor 1-alpha OS=Candida albicans (strain SC5314 / ATCC MYA-2876) GN=W5Q_02251 PE=3 SV=1; Elongation factor 1-alpha OS=Candida albicans P78042 GN=MGS_00808 PE=3 SV=1; Elongation factor 1-alpha OS=Can…			2	99	DMRQTVAVGVIKSVEKSDKAGK	Oxidation(M)@2	missed R-Q@3; missed K-S@12; missed K-S@16; missed K-A@19	-0.00178364	2361.27	473.261	2361.27	473.261	5	13	1.1.1.1778.6	1	17.1631	674.438	17.0686
1	93.17	93.17	63.97	63.97	63.97	tr|C4YDJ3|C4YDJ3_CANAW; tr|A0A0A6Q741|A0A0A6Q741_CANAL; tr|A0A0A6M7H0|A0A0A6M7H0_CANAL; tr|A0A0A6M386|A0A0A6M386_CANAX; tr|A0A0A6LGT0|A0A0A6LGT0_CANAX; tr|A0A0A6L5Y0|A0A0A6L5Y0_CANAX; tr|A0A0A6L1C0|A0A0A6L1C0_CANAX; tr|A0A0A6KWM0|A0A0A6KWM0_CANAX; tr|A0A0A6K9D4|A0A0A6K9D4_CANAX; tr|A0A0A6K455|A0A0A6K455_CANAX; tr|A0A0A6JWU4|A0A0A6JWU4_CANAX; tr|A0A0A6J9A0|A0A0A6J9A0_CANAX; tr|A0A0A6J199|A0A0A6J19…	Elongation factor 1-alpha OS=Candida albicans (strain WO-1) GN=CAWG_00588 PE=3 SV=1; Elongation factor 1-alpha OS=Candida albicans (strain SC5314 / ATCC MYA-2876) GN=I503_00814 PE=3 SV=1; Elongation factor 1-alpha OS=Candida albicans (strain SC5314 / ATCC MYA-2876) GN=W5Q_02251 PE=3 SV=1; Elongation factor 1-alpha OS=Candida albicans P78042 GN=MGS_00808 PE=3 SV=1; Elongation factor 1-alpha OS=Can…			2	99	DMRQTVAVGVIKSVEKSDKAGKVTK	Oxidation(M)@2	missed R-Q@3; missed K-S@12; missed K-S@16; missed K-A@19; missed K-V@22	-0.00972052	2689.47	449.252	2689.48	449.254	6	18	1.1.1.1760.2	1	16.4339	2313.7	16.4265
1	93.17	93.17	63.97	63.97	63.97	tr|C4YDJ3|C4YDJ3_CANAW; tr|A0A0A6Q741|A0A0A6Q741_CANAL; tr|A0A0A6M7H0|A0A0A6M7H0_CANAL; tr|A0A0A6M386|A0A0A6M386_CANAX; tr|A0A0A6LGT0|A0A0A6LGT0_CANAX; tr|A0A0A6L5Y0|A0A0A6L5Y0_CANAX; tr|A0A0A6L1C0|A0A0A6L1C0_CANAX; tr|A0A0A6KWM0|A0A0A6KWM0_CANAX; tr|A0A0A6K9D4|A0A0A6K9D4_CANAX; tr|A0A0A6K455|A0A0A6K455_CANAX; tr|A0A0A6JWU4|A0A0A6JWU4_CANAX; tr|A0A0A6J9A0|A0A0A6J9A0_CANAX; tr|A0A0A6J199|A0A0A6J19…	Elongation factor 1-alpha OS=Candida albicans (strain WO-1) GN=CAWG_00588 PE=3 SV=1; Elongation factor 1-alpha OS=Candida albicans (strain SC5314 / ATCC MYA-2876) GN=I503_00814 PE=3 SV=1; Elongation factor 1-alpha OS=Candida albicans (strain SC5314 / ATCC MYA-2876) GN=W5Q_02251 PE=3 SV=1; Elongation factor 1-alpha OS=Candida albicans P78042 GN=MGS_00808 PE=3 SV=1; Elongation factor 1-alpha OS=Can…			2	99	DMRQTVAVGVIKSVEKSDKAGKVTKAAQK	Oxidation(M)@2	missed R-Q@3; missed K-S@12; missed K-S@16; missed K-A@19; missed K-V@22; missed K-A@25	-0.00539103	3087.7	515.624	3087.71	515.625	6	15	1.1.1.1730.7	1	15.2356	1990.18	15.3402
1	93.17	93.17	63.97	63.97	63.97	tr|C4YDJ3|C4YDJ3_CANAW; tr|A0A0A6Q741|A0A0A6Q741_CANAL; tr|A0A0A6M7H0|A0A0A6M7H0_CANAL; tr|A0A0A6M386|A0A0A6M386_CANAX; tr|A0A0A6LGT0|A0A0A6LGT0_CANAX; tr|A0A0A6L5Y0|A0A0A6L5Y0_CANAX; tr|A0A0A6L1C0|A0A0A6L1C0_CANAX; tr|A0A0A6KWM0|A0A0A6KWM0_CANAX; tr|A0A0A6K9D4|A0A0A6K9D4_CANAX; tr|A0A0A6K455|A0A0A6K455_CANAX; tr|A0A0A6JWU4|A0A0A6JWU4_CANAX; tr|A0A0A6J9A0|A0A0A6J9A0_CANAX; tr|A0A0A6J199|A0A0A6J19…	Elongation factor 1-alpha OS=Candida albicans (strain WO-1) GN=CAWG_00588 PE=3 SV=1; Elongation factor 1-alpha OS=Candida albicans (strain SC5314 / ATCC MYA-2876) GN=I503_00814 PE=3 SV=1; Elongation factor 1-alpha OS=Candida albicans (strain SC5314 / ATCC MYA-2876) GN=W5Q_02251 PE=3 SV=1; Elongation factor 1-alpha OS=Candida albicans P78042 GN=MGS_00808 PE=3 SV=1; Elongation factor 1-alpha OS=Can…			2	99	EHALLAYTLGVK			-0.000147221	1313.73	657.874	1313.73	657.874	2	20	1.1.1.1951.13	1	24.0735	3418.66	24.0078
1	93.17	93.17	63.97	63.97	63.97	tr|C4YDJ3|C4YDJ3_CANAW; tr|A0A0A6Q741|A0A0A6Q741_CANAL; tr|A0A0A6M7H0|A0A0A6M7H0_CANAL; tr|A0A0A6M386|A0A0A6M386_CANAX; tr|A0A0A6LGT0|A0A0A6LGT0_CANAX; tr|A0A0A6L5Y0|A0A0A6L5Y0_CANAX; tr|A0A0A6L1C0|A0A0A6L1C0_CANAX; tr|A0A0A6KWM0|A0A0A6KWM0_CANAX; tr|A0A0A6K9D4|A0A0A6K9D4_CANAX; tr|A0A0A6K455|A0A0A6K455_CANAX; tr|A0A0A6JWU4|A0A0A6JWU4_CANAX; tr|A0A0A6J9A0|A0A0A6J9A0_CANAX; tr|A0A0A6J199|A0A0A6J19…	Elongation factor 1-alpha OS=Candida albicans (strain WO-1) GN=CAWG_00588 PE=3 SV=1; Elongation factor 1-alpha OS=Candida albicans (strain SC5314 / ATCC MYA-2876) GN=I503_00814 PE=3 SV=1; Elongation factor 1-alpha OS=Candida albicans (strain SC5314 / ATCC MYA-2876) GN=W5Q_02251 PE=3 SV=1; Elongation factor 1-alpha OS=Candida albicans P78042 GN=MGS_00808 PE=3 SV=1; Elongation factor 1-alpha OS=Can…			2	99	FAVRDMRQTVAVGVIK	Oxidation(M)@6	missed R-D@4; missed R-Q@7	0.000265894	1805	452.257	1805	452.257	4	17	1.1.1.1747.3	1	15.9127	5830.68	15.8634
1	93.17	93.17	63.97	63.97	63.97	tr|C4YDJ3|C4YDJ3_CANAW; tr|A0A0A6Q741|A0A0A6Q741_CANAL; tr|A0A0A6M7H0|A0A0A6M7H0_CANAL; tr|A0A0A6M386|A0A0A6M386_CANAX; tr|A0A0A6LGT0|A0A0A6LGT0_CANAX; tr|A0A0A6L5Y0|A0A0A6L5Y0_CANAX; tr|A0A0A6L1C0|A0A0A6L1C0_CANAX; tr|A0A0A6KWM0|A0A0A6KWM0_CANAX; tr|A0A0A6K9D4|A0A0A6K9D4_CANAX; tr|A0A0A6K455|A0A0A6K455_CANAX; tr|A0A0A6JWU4|A0A0A6JWU4_CANAX; tr|A0A0A6J9A0|A0A0A6J9A0_CANAX; tr|A0A0A6J199|A0A0A6J19…	Elongation factor 1-alpha OS=Candida albicans (strain WO-1) GN=CAWG_00588 PE=3 SV=1; Elongation factor 1-alpha OS=Candida albicans (strain SC5314 / ATCC MYA-2876) GN=I503_00814 PE=3 SV=1; Elongation factor 1-alpha OS=Candida albicans (strain SC5314 / ATCC MYA-2876) GN=W5Q_02251 PE=3 SV=1; Elongation factor 1-alpha OS=Candida albicans P78042 GN=MGS_00808 PE=3 SV=1; Elongation factor 1-alpha OS=Can…			2	99	FAVRDMRQTVAVGVIKSVEK	Oxidation(M)@6	missed R-D@4; missed R-Q@7; missed K-S@16	-0.00725532	2248.23	563.064	2248.24	563.066	4	13	1.1.1.1810.14	1	18.4637	2668.2	18.4362
1	93.17	93.17	63.97	63.97	63.97	tr|C4YDJ3|C4YDJ3_CANAW; tr|A0A0A6Q741|A0A0A6Q741_CANAL; tr|A0A0A6M7H0|A0A0A6M7H0_CANAL; tr|A0A0A6M386|A0A0A6M386_CANAX; tr|A0A0A6LGT0|A0A0A6LGT0_CANAX; tr|A0A0A6L5Y0|A0A0A6L5Y0_CANAX; tr|A0A0A6L1C0|A0A0A6L1C0_CANAX; tr|A0A0A6KWM0|A0A0A6KWM0_CANAX; tr|A0A0A6K9D4|A0A0A6K9D4_CANAX; tr|A0A0A6K455|A0A0A6K455_CANAX; tr|A0A0A6JWU4|A0A0A6JWU4_CANAX; tr|A0A0A6J9A0|A0A0A6J9A0_CANAX; tr|A0A0A6J199|A0A0A6J19…	Elongation factor 1-alpha OS=Candida albicans (strain WO-1) GN=CAWG_00588 PE=3 SV=1; Elongation factor 1-alpha OS=Candida albicans (strain SC5314 / ATCC MYA-2876) GN=I503_00814 PE=3 SV=1; Elongation factor 1-alpha OS=Candida albicans (strain SC5314 / ATCC MYA-2876) GN=W5Q_02251 PE=3 SV=1; Elongation factor 1-alpha OS=Candida albicans P78042 GN=MGS_00808 PE=3 SV=1; Elongation factor 1-alpha OS=Can…			2	99	FAVRDMRQTVAVGVIKSVEKSDK	Oxidation(M)@6	missed R-D@4; missed R-Q@7; missed K-S@16; missed K-S@20	-0.00768133	2578.38	516.684	2578.39	516.685	5	20	1.1.1.1807.7	1	18.3313	1689.79	18.275
1	93.17	93.17	63.97	63.97	63.97	tr|C4YDJ3|C4YDJ3_CANAW; tr|A0A0A6Q741|A0A0A6Q741_CANAL; tr|A0A0A6M7H0|A0A0A6M7H0_CANAL; tr|A0A0A6M386|A0A0A6M386_CANAX; tr|A0A0A6LGT0|A0A0A6LGT0_CANAX; tr|A0A0A6L5Y0|A0A0A6L5Y0_CANAX; tr|A0A0A6L1C0|A0A0A6L1C0_CANAX; tr|A0A0A6KWM0|A0A0A6KWM0_CANAX; tr|A0A0A6K9D4|A0A0A6K9D4_CANAX; tr|A0A0A6K455|A0A0A6K455_CANAX; tr|A0A0A6JWU4|A0A0A6JWU4_CANAX; tr|A0A0A6J9A0|A0A0A6J9A0_CANAX; tr|A0A0A6J199|A0A0A6J19…	Elongation factor 1-alpha OS=Candida albicans (strain WO-1) GN=CAWG_00588 PE=3 SV=1; Elongation factor 1-alpha OS=Candida albicans (strain SC5314 / ATCC MYA-2876) GN=I503_00814 PE=3 SV=1; Elongation factor 1-alpha OS=Candida albicans (strain SC5314 / ATCC MYA-2876) GN=W5Q_02251 PE=3 SV=1; Elongation factor 1-alpha OS=Candida albicans P78042 GN=MGS_00808 PE=3 SV=1; Elongation factor 1-alpha OS=Can…			2	99	FAVRDMRQTVAVGVIKSVEKSDKAGK	Oxidation(M)@6	missed R-D@4; missed R-Q@7; missed K-S@16; missed K-S@20; missed K-A@23	-0.00921437	2834.53	567.914	2834.54	567.916	5	15	1.1.1.1782.12	1	17.3342	1473.94	17.31
1	93.17	93.17	63.97	63.97	63.97	tr|C4YDJ3|C4YDJ3_CANAW; tr|A0A0A6Q741|A0A0A6Q741_CANAL; tr|A0A0A6M7H0|A0A0A6M7H0_CANAL; tr|A0A0A6M386|A0A0A6M386_CANAX; tr|A0A0A6LGT0|A0A0A6LGT0_CANAX; tr|A0A0A6L5Y0|A0A0A6L5Y0_CANAX; tr|A0A0A6L1C0|A0A0A6L1C0_CANAX; tr|A0A0A6KWM0|A0A0A6KWM0_CANAX; tr|A0A0A6K9D4|A0A0A6K9D4_CANAX; tr|A0A0A6K455|A0A0A6K455_CANAX; tr|A0A0A6JWU4|A0A0A6JWU4_CANAX; tr|A0A0A6J9A0|A0A0A6J9A0_CANAX; tr|A0A0A6J199|A0A0A6J19…	Elongation factor 1-alpha OS=Candida albicans (strain WO-1) GN=CAWG_00588 PE=3 SV=1; Elongation factor 1-alpha OS=Candida albicans (strain SC5314 / ATCC MYA-2876) GN=I503_00814 PE=3 SV=1; Elongation factor 1-alpha OS=Candida albicans (strain SC5314 / ATCC MYA-2876) GN=W5Q_02251 PE=3 SV=1; Elongation factor 1-alpha OS=Candida albicans P78042 GN=MGS_00808 PE=3 SV=1; Elongation factor 1-alpha OS=Can…			2	99	FAVRDMRQTVAVGVIKSVEKSDKAGKVTK	Oxidation(M)@6	missed R-D@4; missed R-Q@7; missed K-S@16; missed K-S@20; missed K-A@23; missed K-V@26	-0.0118715	3162.74	528.131	3162.75	528.133	6	22	1.1.1.1766.10	1	16.6881	6560.84	16.8678
1	93.17	93.17	63.97	63.97	63.97	tr|C4YDJ3|C4YDJ3_CANAW; tr|A0A0A6Q741|A0A0A6Q741_CANAL; tr|A0A0A6M7H0|A0A0A6M7H0_CANAL; tr|A0A0A6M386|A0A0A6M386_CANAX; tr|A0A0A6LGT0|A0A0A6LGT0_CANAX; tr|A0A0A6L5Y0|A0A0A6L5Y0_CANAX; tr|A0A0A6L1C0|A0A0A6L1C0_CANAX; tr|A0A0A6KWM0|A0A0A6KWM0_CANAX; tr|A0A0A6K9D4|A0A0A6K9D4_CANAX; tr|A0A0A6K455|A0A0A6K455_CANAX; tr|A0A0A6JWU4|A0A0A6JWU4_CANAX; tr|A0A0A6J9A0|A0A0A6J9A0_CANAX; tr|A0A0A6J199|A0A0A6J19…	Elongation factor 1-alpha OS=Candida albicans (strain WO-1) GN=CAWG_00588 PE=3 SV=1; Elongation factor 1-alpha OS=Candida albicans (strain SC5314 / ATCC MYA-2876) GN=I503_00814 PE=3 SV=1; Elongation factor 1-alpha OS=Candida albicans (strain SC5314 / ATCC MYA-2876) GN=W5Q_02251 PE=3 SV=1; Elongation factor 1-alpha OS=Candida albicans P78042 GN=MGS_00808 PE=3 SV=1; Elongation factor 1-alpha OS=Can…			2	99	FAVRDMRQTVAVGVIKSVEKSDKAGKVTKAAQK	Oxidation(M)@6	missed R-D@4; missed R-Q@7; missed K-S@16; missed K-S@20; missed K-A@23; missed K-V@26; missed K-A@29	-0.0120287	3560.97	713.201	3560.98	713.204	5	17	1.1.1.1748.18	1	15.9777	1343.54	15.9437
1	93.17	93.17	63.97	63.97	63.97	tr|C4YDJ3|C4YDJ3_CANAW; tr|A0A0A6Q741|A0A0A6Q741_CANAL; tr|A0A0A6M7H0|A0A0A6M7H0_CANAL; tr|A0A0A6M386|A0A0A6M386_CANAX; tr|A0A0A6LGT0|A0A0A6LGT0_CANAX; tr|A0A0A6L5Y0|A0A0A6L5Y0_CANAX; tr|A0A0A6L1C0|A0A0A6L1C0_CANAX; tr|A0A0A6KWM0|A0A0A6KWM0_CANAX; tr|A0A0A6K9D4|A0A0A6K9D4_CANAX; tr|A0A0A6K455|A0A0A6K455_CANAX; tr|A0A0A6JWU4|A0A0A6JWU4_CANAX; tr|A0A0A6J9A0|A0A0A6J9A0_CANAX; tr|A0A0A6J199|A0A0A6J19…	Elongation factor 1-alpha OS=Candida albicans (strain WO-1) GN=CAWG_00588 PE=3 SV=1; Elongation factor 1-alpha OS=Candida albicans (strain SC5314 / ATCC MYA-2876) GN=I503_00814 PE=3 SV=1; Elongation factor 1-alpha OS=Candida albicans (strain SC5314 / ATCC MYA-2876) GN=W5Q_02251 PE=3 SV=1; Elongation factor 1-alpha OS=Candida albicans P78042 GN=MGS_00808 PE=3 SV=1; Elongation factor 1-alpha OS=Can…			2	99	FDTLVEKIDRR		missed K-I@7; missed R-R@10	-0.000456479	1390.76	464.593	1390.76	464.593	3	10	1.1.1.1788.5	1	17.5631	3504.73	17.5108
1	93.17	93.17	63.97	63.97	63.97	tr|C4YDJ3|C4YDJ3_CANAW; tr|A0A0A6Q741|A0A0A6Q741_CANAL; tr|A0A0A6M7H0|A0A0A6M7H0_CANAL; tr|A0A0A6M386|A0A0A6M386_CANAX; tr|A0A0A6LGT0|A0A0A6LGT0_CANAX; tr|A0A0A6L5Y0|A0A0A6L5Y0_CANAX; tr|A0A0A6L1C0|A0A0A6L1C0_CANAX; tr|A0A0A6KWM0|A0A0A6KWM0_CANAX; tr|A0A0A6K9D4|A0A0A6K9D4_CANAX; tr|A0A0A6K455|A0A0A6K455_CANAX; tr|A0A0A6JWU4|A0A0A6JWU4_CANAX; tr|A0A0A6J9A0|A0A0A6J9A0_CANAX; tr|A0A0A6J199|A0A0A6J19…	Elongation factor 1-alpha OS=Candida albicans (strain WO-1) GN=CAWG_00588 PE=3 SV=1; Elongation factor 1-alpha OS=Candida albicans (strain SC5314 / ATCC MYA-2876) GN=I503_00814 PE=3 SV=1; Elongation factor 1-alpha OS=Candida albicans (strain SC5314 / ATCC MYA-2876) GN=W5Q_02251 PE=3 SV=1; Elongation factor 1-alpha OS=Candida albicans P78042 GN=MGS_00808 PE=3 SV=1; Elongation factor 1-alpha OS=Can…			2	99	FDTLVEKIDRRTGKKLEENPKFVK		missed K-I@7; missed R-R@10; missed R-T@11; missed K-K@14; missed K-L@15; missed K-F@21	-0.00391863	2889.6	482.608	2889.61	482.609	6	11	1.1.1.1800.7	1	18.0489	1149.46	18.0331
1	93.17	93.17	63.97	63.97	63.97	tr|C4YDJ3|C4YDJ3_CANAW; tr|A0A0A6Q741|A0A0A6Q741_CANAL; tr|A0A0A6M7H0|A0A0A6M7H0_CANAL; tr|A0A0A6M386|A0A0A6M386_CANAX; tr|A0A0A6LGT0|A0A0A6LGT0_CANAX; tr|A0A0A6L5Y0|A0A0A6L5Y0_CANAX; tr|A0A0A6L1C0|A0A0A6L1C0_CANAX; tr|A0A0A6KWM0|A0A0A6KWM0_CANAX; tr|A0A0A6K9D4|A0A0A6K9D4_CANAX; tr|A0A0A6K455|A0A0A6K455_CANAX; tr|A0A0A6JWU4|A0A0A6JWU4_CANAX; tr|A0A0A6J9A0|A0A0A6J9A0_CANAX; tr|A0A0A6J199|A0A0A6J19…	Elongation factor 1-alpha OS=Candida albicans (strain WO-1) GN=CAWG_00588 PE=3 SV=1; Elongation factor 1-alpha OS=Candida albicans (strain SC5314 / ATCC MYA-2876) GN=I503_00814 PE=3 SV=1; Elongation factor 1-alpha OS=Candida albicans (strain SC5314 / ATCC MYA-2876) GN=W5Q_02251 PE=3 SV=1; Elongation factor 1-alpha OS=Candida albicans P78042 GN=MGS_00808 PE=3 SV=1; Elongation factor 1-alpha OS=Can…			2	99	GIGTVPVGRVETGIIKAGMVVTFAPAGVTTEVK	Oxidation(M)@19	cleaved G-G@N-term; missed R-V@9; missed K-A@16	-0.0136832	3269.79	818.455	3269.81	818.459	4	19	1.1.1.2171.18	1	32.9067	1822.33	33.0731
1	93.17	93.17	63.97	63.97	63.97	tr|C4YDJ3|C4YDJ3_CANAW; tr|A0A0A6Q741|A0A0A6Q741_CANAL; tr|A0A0A6M7H0|A0A0A6M7H0_CANAL; tr|A0A0A6M386|A0A0A6M386_CANAX; tr|A0A0A6LGT0|A0A0A6LGT0_CANAX; tr|A0A0A6L5Y0|A0A0A6L5Y0_CANAX; tr|A0A0A6L1C0|A0A0A6L1C0_CANAX; tr|A0A0A6KWM0|A0A0A6KWM0_CANAX; tr|A0A0A6K9D4|A0A0A6K9D4_CANAX; tr|A0A0A6K455|A0A0A6K455_CANAX; tr|A0A0A6JWU4|A0A0A6JWU4_CANAX; tr|A0A0A6J9A0|A0A0A6J9A0_CANAX; tr|A0A0A6J199|A0A0A6J19…	Elongation factor 1-alpha OS=Candida albicans (strain WO-1) GN=CAWG_00588 PE=3 SV=1; Elongation factor 1-alpha OS=Candida albicans (strain SC5314 / ATCC MYA-2876) GN=I503_00814 PE=3 SV=1; Elongation factor 1-alpha OS=Candida albicans (strain SC5314 / ATCC MYA-2876) GN=W5Q_02251 PE=3 SV=1; Elongation factor 1-alpha OS=Candida albicans P78042 GN=MGS_00808 PE=3 SV=1; Elongation factor 1-alpha OS=Can…			2	99	IDRRTGKKLEENPKFVK		missed R-R@3; missed R-T@4; missed K-K@7; missed K-L@8; missed K-F@14	-0.00649119	2057.17	412.441	2057.17	412.442	5	19	1.1.1.1525.2	1	8.137	927.095	8.1414
1	93.17	93.17	63.97	63.97	63.97	tr|C4YDJ3|C4YDJ3_CANAW; tr|A0A0A6Q741|A0A0A6Q741_CANAL; tr|A0A0A6M7H0|A0A0A6M7H0_CANAL; tr|A0A0A6M386|A0A0A6M386_CANAX; tr|A0A0A6LGT0|A0A0A6LGT0_CANAX; tr|A0A0A6L5Y0|A0A0A6L5Y0_CANAX; tr|A0A0A6L1C0|A0A0A6L1C0_CANAX; tr|A0A0A6KWM0|A0A0A6KWM0_CANAX; tr|A0A0A6K9D4|A0A0A6K9D4_CANAX; tr|A0A0A6K455|A0A0A6K455_CANAX; tr|A0A0A6JWU4|A0A0A6JWU4_CANAX; tr|A0A0A6J9A0|A0A0A6J9A0_CANAX; tr|A0A0A6J199|A0A0A6J19…	Elongation factor 1-alpha OS=Candida albicans (strain WO-1) GN=CAWG_00588 PE=3 SV=1; Elongation factor 1-alpha OS=Candida albicans (strain SC5314 / ATCC MYA-2876) GN=I503_00814 PE=3 SV=1; Elongation factor 1-alpha OS=Candida albicans (strain SC5314 / ATCC MYA-2876) GN=W5Q_02251 PE=3 SV=1; Elongation factor 1-alpha OS=Candida albicans P78042 GN=MGS_00808 PE=3 SV=1; Elongation factor 1-alpha OS=Can…			2	99	IDRRTGKKLEENPKFVKSGDAAIVK		missed R-R@3; missed R-T@4; missed K-K@7; missed K-L@8; missed K-F@14; missed K-S@17	-0.00619033	2798.57	467.436	2798.58	467.437	6	23	1.1.1.1615.3	1	10.6471	984.024	10.8205
1	93.17	93.17	63.97	63.97	63.97	tr|C4YDJ3|C4YDJ3_CANAW; tr|A0A0A6Q741|A0A0A6Q741_CANAL; tr|A0A0A6M7H0|A0A0A6M7H0_CANAL; tr|A0A0A6M386|A0A0A6M386_CANAX; tr|A0A0A6LGT0|A0A0A6LGT0_CANAX; tr|A0A0A6L5Y0|A0A0A6L5Y0_CANAX; tr|A0A0A6L1C0|A0A0A6L1C0_CANAX; tr|A0A0A6KWM0|A0A0A6KWM0_CANAX; tr|A0A0A6K9D4|A0A0A6K9D4_CANAX; tr|A0A0A6K455|A0A0A6K455_CANAX; tr|A0A0A6JWU4|A0A0A6JWU4_CANAX; tr|A0A0A6J9A0|A0A0A6J9A0_CANAX; tr|A0A0A6J199|A0A0A6J19…	Elongation factor 1-alpha OS=Candida albicans (strain WO-1) GN=CAWG_00588 PE=3 SV=1; Elongation factor 1-alpha OS=Candida albicans (strain SC5314 / ATCC MYA-2876) GN=I503_00814 PE=3 SV=1; Elongation factor 1-alpha OS=Candida albicans (strain SC5314 / ATCC MYA-2876) GN=W5Q_02251 PE=3 SV=1; Elongation factor 1-alpha OS=Candida albicans P78042 GN=MGS_00808 PE=3 SV=1; Elongation factor 1-alpha OS=Can…			2	99	IGGIGTVPVGRVETGIIK		missed R-V@11	-0.000630856	1765.05	589.356	1765.05	589.356	3	15	1.1.1.1958.9	1	24.3472	10217.7	24.3281
1	93.17	93.17	63.97	63.97	63.97	tr|C4YDJ3|C4YDJ3_CANAW; tr|A0A0A6Q741|A0A0A6Q741_CANAL; tr|A0A0A6M7H0|A0A0A6M7H0_CANAL; tr|A0A0A6M386|A0A0A6M386_CANAX; tr|A0A0A6LGT0|A0A0A6LGT0_CANAX; tr|A0A0A6L5Y0|A0A0A6L5Y0_CANAX; tr|A0A0A6L1C0|A0A0A6L1C0_CANAX; tr|A0A0A6KWM0|A0A0A6KWM0_CANAX; tr|A0A0A6K9D4|A0A0A6K9D4_CANAX; tr|A0A0A6K455|A0A0A6K455_CANAX; tr|A0A0A6JWU4|A0A0A6JWU4_CANAX; tr|A0A0A6J9A0|A0A0A6J9A0_CANAX; tr|A0A0A6J199|A0A0A6J19…	Elongation factor 1-alpha OS=Candida albicans (strain WO-1) GN=CAWG_00588 PE=3 SV=1; Elongation factor 1-alpha OS=Candida albicans (strain SC5314 / ATCC MYA-2876) GN=I503_00814 PE=3 SV=1; Elongation factor 1-alpha OS=Candida albicans (strain SC5314 / ATCC MYA-2876) GN=W5Q_02251 PE=3 SV=1; Elongation factor 1-alpha OS=Candida albicans P78042 GN=MGS_00808 PE=3 SV=1; Elongation factor 1-alpha OS=Can…			2	99	IGGIGTVPVGRVETGIIKAGMVVTFAPAGVTTEVK	Oxidation(M)@21	missed R-V@11; missed K-A@18	-0.00198681	3439.91	860.985	3439.91	860.985	4	27	1.1.1.2213.19	1	34.5898	17831.6	34.5542
1	93.17	93.17	63.97	63.97	63.97	tr|C4YDJ3|C4YDJ3_CANAW; tr|A0A0A6Q741|A0A0A6Q741_CANAL; tr|A0A0A6M7H0|A0A0A6M7H0_CANAL; tr|A0A0A6M386|A0A0A6M386_CANAX; tr|A0A0A6LGT0|A0A0A6LGT0_CANAX; tr|A0A0A6L5Y0|A0A0A6L5Y0_CANAX; tr|A0A0A6L1C0|A0A0A6L1C0_CANAX; tr|A0A0A6KWM0|A0A0A6KWM0_CANAX; tr|A0A0A6K9D4|A0A0A6K9D4_CANAX; tr|A0A0A6K455|A0A0A6K455_CANAX; tr|A0A0A6JWU4|A0A0A6JWU4_CANAX; tr|A0A0A6J9A0|A0A0A6J9A0_CANAX; tr|A0A0A6J199|A0A0A6J19…	Elongation factor 1-alpha OS=Candida albicans (strain WO-1) GN=CAWG_00588 PE=3 SV=1; Elongation factor 1-alpha OS=Candida albicans (strain SC5314 / ATCC MYA-2876) GN=I503_00814 PE=3 SV=1; Elongation factor 1-alpha OS=Candida albicans (strain SC5314 / ATCC MYA-2876) GN=W5Q_02251 PE=3 SV=1; Elongation factor 1-alpha OS=Candida albicans P78042 GN=MGS_00808 PE=3 SV=1; Elongation factor 1-alpha OS=Can…			2	99	KLEENPKFVK		missed K-L@1; missed K-F@7	-0.00136458	1230.7	411.239	1230.7	411.24	3	12	1.1.1.1534.2	1	8.3531	82.0248	8.2735
1	93.17	93.17	63.97	63.97	63.97	tr|C4YDJ3|C4YDJ3_CANAW; tr|A0A0A6Q741|A0A0A6Q741_CANAL; tr|A0A0A6M7H0|A0A0A6M7H0_CANAL; tr|A0A0A6M386|A0A0A6M386_CANAX; tr|A0A0A6LGT0|A0A0A6LGT0_CANAX; tr|A0A0A6L5Y0|A0A0A6L5Y0_CANAX; tr|A0A0A6L1C0|A0A0A6L1C0_CANAX; tr|A0A0A6KWM0|A0A0A6KWM0_CANAX; tr|A0A0A6K9D4|A0A0A6K9D4_CANAX; tr|A0A0A6K455|A0A0A6K455_CANAX; tr|A0A0A6JWU4|A0A0A6JWU4_CANAX; tr|A0A0A6J9A0|A0A0A6J9A0_CANAX; tr|A0A0A6J199|A0A0A6J19…	Elongation factor 1-alpha OS=Candida albicans (strain WO-1) GN=CAWG_00588 PE=3 SV=1; Elongation factor 1-alpha OS=Candida albicans (strain SC5314 / ATCC MYA-2876) GN=I503_00814 PE=3 SV=1; Elongation factor 1-alpha OS=Candida albicans (strain SC5314 / ATCC MYA-2876) GN=W5Q_02251 PE=3 SV=1; Elongation factor 1-alpha OS=Candida albicans P78042 GN=MGS_00808 PE=3 SV=1; Elongation factor 1-alpha OS=Can…			2	99	KLEENPKFVKSGDAAIVK		missed K-L@1; missed K-F@7; missed K-S@10	-0.00129614	1972.1	494.032	1972.1	494.032	4	23	1.1.1.1663.3	1	12.5619	8550.35	12.2972
1	93.17	93.17	63.97	63.97	63.97	tr|C4YDJ3|C4YDJ3_CANAW; tr|A0A0A6Q741|A0A0A6Q741_CANAL; tr|A0A0A6M7H0|A0A0A6M7H0_CANAL; tr|A0A0A6M386|A0A0A6M386_CANAX; tr|A0A0A6LGT0|A0A0A6LGT0_CANAX; tr|A0A0A6L5Y0|A0A0A6L5Y0_CANAX; tr|A0A0A6L1C0|A0A0A6L1C0_CANAX; tr|A0A0A6KWM0|A0A0A6KWM0_CANAX; tr|A0A0A6K9D4|A0A0A6K9D4_CANAX; tr|A0A0A6K455|A0A0A6K455_CANAX; tr|A0A0A6JWU4|A0A0A6JWU4_CANAX; tr|A0A0A6J9A0|A0A0A6J9A0_CANAX; tr|A0A0A6J199|A0A0A6J19…	Elongation factor 1-alpha OS=Candida albicans (strain WO-1) GN=CAWG_00588 PE=3 SV=1; Elongation factor 1-alpha OS=Candida albicans (strain SC5314 / ATCC MYA-2876) GN=I503_00814 PE=3 SV=1; Elongation factor 1-alpha OS=Candida albicans (strain SC5314 / ATCC MYA-2876) GN=W5Q_02251 PE=3 SV=1; Elongation factor 1-alpha OS=Candida albicans P78042 GN=MGS_00808 PE=3 SV=1; Elongation factor 1-alpha OS=Can…			2	98.99	LEENPKFVKSGDAAIVK		missed K-F@6; missed K-S@9	0.0142964	1844.02	462.012	1844	462.008	4	10	1.1.1.1698.4	1	13.9475	828.123	13.9369
1	93.17	93.17	63.97	63.97	63.97	tr|C4YDJ3|C4YDJ3_CANAW; tr|A0A0A6Q741|A0A0A6Q741_CANAL; tr|A0A0A6M7H0|A0A0A6M7H0_CANAL; tr|A0A0A6M386|A0A0A6M386_CANAX; tr|A0A0A6LGT0|A0A0A6LGT0_CANAX; tr|A0A0A6L5Y0|A0A0A6L5Y0_CANAX; tr|A0A0A6L1C0|A0A0A6L1C0_CANAX; tr|A0A0A6KWM0|A0A0A6KWM0_CANAX; tr|A0A0A6K9D4|A0A0A6K9D4_CANAX; tr|A0A0A6K455|A0A0A6K455_CANAX; tr|A0A0A6JWU4|A0A0A6JWU4_CANAX; tr|A0A0A6J9A0|A0A0A6J9A0_CANAX; tr|A0A0A6J199|A0A0A6J19…	Elongation factor 1-alpha OS=Candida albicans (strain WO-1) GN=CAWG_00588 PE=3 SV=1; Elongation factor 1-alpha OS=Candida albicans (strain SC5314 / ATCC MYA-2876) GN=I503_00814 PE=3 SV=1; Elongation factor 1-alpha OS=Candida albicans (strain SC5314 / ATCC MYA-2876) GN=W5Q_02251 PE=3 SV=1; Elongation factor 1-alpha OS=Candida albicans P78042 GN=MGS_00808 PE=3 SV=1; Elongation factor 1-alpha OS=Can…			2	99	MVPTKPMCVEAFTDYPPLGR	Oxidation(M)@1; Oxidation(M)@7; Carbamidomethyl(C)@8		0.000748774	2340.1	781.039	2340.1	781.039	3	25	1.1.1.1984.15	1	25.3996	21580.2	24.9702
1	93.17	93.17	63.97	63.97	63.97	tr|C4YDJ3|C4YDJ3_CANAW; tr|A0A0A6Q741|A0A0A6Q741_CANAL; tr|A0A0A6M7H0|A0A0A6M7H0_CANAL; tr|A0A0A6M386|A0A0A6M386_CANAX; tr|A0A0A6LGT0|A0A0A6LGT0_CANAX; tr|A0A0A6L5Y0|A0A0A6L5Y0_CANAX; tr|A0A0A6L1C0|A0A0A6L1C0_CANAX; tr|A0A0A6KWM0|A0A0A6KWM0_CANAX; tr|A0A0A6K9D4|A0A0A6K9D4_CANAX; tr|A0A0A6K455|A0A0A6K455_CANAX; tr|A0A0A6JWU4|A0A0A6JWU4_CANAX; tr|A0A0A6J9A0|A0A0A6J9A0_CANAX; tr|A0A0A6J199|A0A0A6J19…	Elongation factor 1-alpha OS=Candida albicans (strain WO-1) GN=CAWG_00588 PE=3 SV=1; Elongation factor 1-alpha OS=Candida albicans (strain SC5314 / ATCC MYA-2876) GN=I503_00814 PE=3 SV=1; Elongation factor 1-alpha OS=Candida albicans (strain SC5314 / ATCC MYA-2876) GN=W5Q_02251 PE=3 SV=1; Elongation factor 1-alpha OS=Candida albicans P78042 GN=MGS_00808 PE=3 SV=1; Elongation factor 1-alpha OS=Can…			2	99	QTVAVGVIKSVEK	Gln->pyro-Glu@N-term	missed K-S@9	0.000974615	1339.77	670.893	1339.77	670.893	2	18	1.1.1.1968.13	1	24.7551	3111.09	24.7695
1	93.17	93.17	63.97	63.97	63.97	tr|C4YDJ3|C4YDJ3_CANAW; tr|A0A0A6Q741|A0A0A6Q741_CANAL; tr|A0A0A6M7H0|A0A0A6M7H0_CANAL; tr|A0A0A6M386|A0A0A6M386_CANAX; tr|A0A0A6LGT0|A0A0A6LGT0_CANAX; tr|A0A0A6L5Y0|A0A0A6L5Y0_CANAX; tr|A0A0A6L1C0|A0A0A6L1C0_CANAX; tr|A0A0A6KWM0|A0A0A6KWM0_CANAX; tr|A0A0A6K9D4|A0A0A6K9D4_CANAX; tr|A0A0A6K455|A0A0A6K455_CANAX; tr|A0A0A6JWU4|A0A0A6JWU4_CANAX; tr|A0A0A6J9A0|A0A0A6J9A0_CANAX; tr|A0A0A6J199|A0A0A6J19…	Elongation factor 1-alpha OS=Candida albicans (strain WO-1) GN=CAWG_00588 PE=3 SV=1; Elongation factor 1-alpha OS=Candida albicans (strain SC5314 / ATCC MYA-2876) GN=I503_00814 PE=3 SV=1; Elongation factor 1-alpha OS=Candida albicans (strain SC5314 / ATCC MYA-2876) GN=W5Q_02251 PE=3 SV=1; Elongation factor 1-alpha OS=Candida albicans P78042 GN=MGS_00808 PE=3 SV=1; Elongation factor 1-alpha OS=Can…			2	99	QTVAVGVIKSVEKSDK	Gln->pyro-Glu@N-term	missed K-S@9; missed K-S@13	0.00178734	1669.93	557.649	1669.93	557.649	3	17	1.1.1.1944.7	1	23.7826	1871.98	23.767
1	93.17	93.17	63.97	63.97	63.97	tr|C4YDJ3|C4YDJ3_CANAW; tr|A0A0A6Q741|A0A0A6Q741_CANAL; tr|A0A0A6M7H0|A0A0A6M7H0_CANAL; tr|A0A0A6M386|A0A0A6M386_CANAX; tr|A0A0A6LGT0|A0A0A6LGT0_CANAX; tr|A0A0A6L5Y0|A0A0A6L5Y0_CANAX; tr|A0A0A6L1C0|A0A0A6L1C0_CANAX; tr|A0A0A6KWM0|A0A0A6KWM0_CANAX; tr|A0A0A6K9D4|A0A0A6K9D4_CANAX; tr|A0A0A6K455|A0A0A6K455_CANAX; tr|A0A0A6JWU4|A0A0A6JWU4_CANAX; tr|A0A0A6J9A0|A0A0A6J9A0_CANAX; tr|A0A0A6J199|A0A0A6J19…	Elongation factor 1-alpha OS=Candida albicans (strain WO-1) GN=CAWG_00588 PE=3 SV=1; Elongation factor 1-alpha OS=Candida albicans (strain SC5314 / ATCC MYA-2876) GN=I503_00814 PE=3 SV=1; Elongation factor 1-alpha OS=Candida albicans (strain SC5314 / ATCC MYA-2876) GN=W5Q_02251 PE=3 SV=1; Elongation factor 1-alpha OS=Candida albicans P78042 GN=MGS_00808 PE=3 SV=1; Elongation factor 1-alpha OS=Can…			2	99	QTVAVGVIKSVEKSDKAGK		missed K-S@9; missed K-S@13; missed K-A@16	-0.00438217	1943.1	486.783	1943.11	486.784	4	11	1.1.1.1725.6	1	15.033	522.805	15.0993
1	93.17	93.17	63.97	63.97	63.97	tr|C4YDJ3|C4YDJ3_CANAW; tr|A0A0A6Q741|A0A0A6Q741_CANAL; tr|A0A0A6M7H0|A0A0A6M7H0_CANAL; tr|A0A0A6M386|A0A0A6M386_CANAX; tr|A0A0A6LGT0|A0A0A6LGT0_CANAX; tr|A0A0A6L5Y0|A0A0A6L5Y0_CANAX; tr|A0A0A6L1C0|A0A0A6L1C0_CANAX; tr|A0A0A6KWM0|A0A0A6KWM0_CANAX; tr|A0A0A6K9D4|A0A0A6K9D4_CANAX; tr|A0A0A6K455|A0A0A6K455_CANAX; tr|A0A0A6JWU4|A0A0A6JWU4_CANAX; tr|A0A0A6J9A0|A0A0A6J9A0_CANAX; tr|A0A0A6J199|A0A0A6J19…	Elongation factor 1-alpha OS=Candida albicans (strain WO-1) GN=CAWG_00588 PE=3 SV=1; Elongation factor 1-alpha OS=Candida albicans (strain SC5314 / ATCC MYA-2876) GN=I503_00814 PE=3 SV=1; Elongation factor 1-alpha OS=Candida albicans (strain SC5314 / ATCC MYA-2876) GN=W5Q_02251 PE=3 SV=1; Elongation factor 1-alpha OS=Candida albicans P78042 GN=MGS_00808 PE=3 SV=1; Elongation factor 1-alpha OS=Can…			2	99	QTVAVGVIKSVEKSDKAGKVTK	Gln->pyro-Glu@N-term	missed K-S@9; missed K-S@13; missed K-A@16; missed K-V@19	-0.00504804	2254.28	451.864	2254.29	451.865	5	21	1.1.1.1845.3	1	19.8416	4353.36	19.9128
1	93.17	93.17	63.97	63.97	63.97	tr|C4YDJ3|C4YDJ3_CANAW; tr|A0A0A6Q741|A0A0A6Q741_CANAL; tr|A0A0A6M7H0|A0A0A6M7H0_CANAL; tr|A0A0A6M386|A0A0A6M386_CANAX; tr|A0A0A6LGT0|A0A0A6LGT0_CANAX; tr|A0A0A6L5Y0|A0A0A6L5Y0_CANAX; tr|A0A0A6L1C0|A0A0A6L1C0_CANAX; tr|A0A0A6KWM0|A0A0A6KWM0_CANAX; tr|A0A0A6K9D4|A0A0A6K9D4_CANAX; tr|A0A0A6K455|A0A0A6K455_CANAX; tr|A0A0A6JWU4|A0A0A6JWU4_CANAX; tr|A0A0A6J9A0|A0A0A6J9A0_CANAX; tr|A0A0A6J199|A0A0A6J19…	Elongation factor 1-alpha OS=Candida albicans (strain WO-1) GN=CAWG_00588 PE=3 SV=1; Elongation factor 1-alpha OS=Candida albicans (strain SC5314 / ATCC MYA-2876) GN=I503_00814 PE=3 SV=1; Elongation factor 1-alpha OS=Candida albicans (strain SC5314 / ATCC MYA-2876) GN=W5Q_02251 PE=3 SV=1; Elongation factor 1-alpha OS=Candida albicans P78042 GN=MGS_00808 PE=3 SV=1; Elongation factor 1-alpha OS=Can…			2	99	QTVAVGVIKSVEKSDKAGKVTKAAQK	Gln->pyro-Glu@N-term	missed K-S@9; missed K-S@13; missed K-A@16; missed K-V@19; missed K-A@22	-0.0131425	2652.5	443.091	2652.52	443.094	6	20	1.1.1.1801.2	1	18.0809	1599.82	18.0733
1	93.17	93.17	63.97	63.97	63.97	tr|C4YDJ3|C4YDJ3_CANAW; tr|A0A0A6Q741|A0A0A6Q741_CANAL; tr|A0A0A6M7H0|A0A0A6M7H0_CANAL; tr|A0A0A6M386|A0A0A6M386_CANAX; tr|A0A0A6LGT0|A0A0A6LGT0_CANAX; tr|A0A0A6L5Y0|A0A0A6L5Y0_CANAX; tr|A0A0A6L1C0|A0A0A6L1C0_CANAX; tr|A0A0A6KWM0|A0A0A6KWM0_CANAX; tr|A0A0A6K9D4|A0A0A6K9D4_CANAX; tr|A0A0A6K455|A0A0A6K455_CANAX; tr|A0A0A6JWU4|A0A0A6JWU4_CANAX; tr|A0A0A6J9A0|A0A0A6J9A0_CANAX; tr|A0A0A6J199|A0A0A6J19…	Elongation factor 1-alpha OS=Candida albicans (strain WO-1) GN=CAWG_00588 PE=3 SV=1; Elongation factor 1-alpha OS=Candida albicans (strain SC5314 / ATCC MYA-2876) GN=I503_00814 PE=3 SV=1; Elongation factor 1-alpha OS=Candida albicans (strain SC5314 / ATCC MYA-2876) GN=W5Q_02251 PE=3 SV=1; Elongation factor 1-alpha OS=Candida albicans P78042 GN=MGS_00808 PE=3 SV=1; Elongation factor 1-alpha OS=Can…			2	99	RTGKKLEENPKFVKSGDAAIVK		missed R-T@1; missed K-K@4; missed K-L@5; missed K-F@11; missed K-S@14	-0.00618357	2414.36	483.879	2414.36	483.88	5	28	1.1.1.1585.2	1	9.5402	588.604	9.5549
1	93.17	93.17	63.97	63.97	63.97	tr|C4YDJ3|C4YDJ3_CANAW; tr|A0A0A6Q741|A0A0A6Q741_CANAL; tr|A0A0A6M7H0|A0A0A6M7H0_CANAL; tr|A0A0A6M386|A0A0A6M386_CANAX; tr|A0A0A6LGT0|A0A0A6LGT0_CANAX; tr|A0A0A6L5Y0|A0A0A6L5Y0_CANAX; tr|A0A0A6L1C0|A0A0A6L1C0_CANAX; tr|A0A0A6KWM0|A0A0A6KWM0_CANAX; tr|A0A0A6K9D4|A0A0A6K9D4_CANAX; tr|A0A0A6K455|A0A0A6K455_CANAX; tr|A0A0A6JWU4|A0A0A6JWU4_CANAX; tr|A0A0A6J9A0|A0A0A6J9A0_CANAX; tr|A0A0A6J199|A0A0A6J19…	Elongation factor 1-alpha OS=Candida albicans (strain WO-1) GN=CAWG_00588 PE=3 SV=1; Elongation factor 1-alpha OS=Candida albicans (strain SC5314 / ATCC MYA-2876) GN=I503_00814 PE=3 SV=1; Elongation factor 1-alpha OS=Candida albicans (strain SC5314 / ATCC MYA-2876) GN=W5Q_02251 PE=3 SV=1; Elongation factor 1-alpha OS=Candida albicans P78042 GN=MGS_00808 PE=3 SV=1; Elongation factor 1-alpha OS=Can…			2	99	SGDAAIVKMVPTKPMCVEAFTDYPPLGR	Oxidation(M)@9; Oxidation(M)@15; Carbamidomethyl(C)@16	missed K-M@8	-0.00219962	3081.49	771.381	3081.5	771.382	4	25	1.1.1.1999.15	1	26.002	4493.82	26.013
1	93.17	93.17	63.97	63.97	63.97	tr|C4YDJ3|C4YDJ3_CANAW; tr|A0A0A6Q741|A0A0A6Q741_CANAL; tr|A0A0A6M7H0|A0A0A6M7H0_CANAL; tr|A0A0A6M386|A0A0A6M386_CANAX; tr|A0A0A6LGT0|A0A0A6LGT0_CANAX; tr|A0A0A6L5Y0|A0A0A6L5Y0_CANAX; tr|A0A0A6L1C0|A0A0A6L1C0_CANAX; tr|A0A0A6KWM0|A0A0A6KWM0_CANAX; tr|A0A0A6K9D4|A0A0A6K9D4_CANAX; tr|A0A0A6K455|A0A0A6K455_CANAX; tr|A0A0A6JWU4|A0A0A6JWU4_CANAX; tr|A0A0A6J9A0|A0A0A6J9A0_CANAX; tr|A0A0A6J199|A0A0A6J19…	Elongation factor 1-alpha OS=Candida albicans (strain WO-1) GN=CAWG_00588 PE=3 SV=1; Elongation factor 1-alpha OS=Candida albicans (strain SC5314 / ATCC MYA-2876) GN=I503_00814 PE=3 SV=1; Elongation factor 1-alpha OS=Candida albicans (strain SC5314 / ATCC MYA-2876) GN=W5Q_02251 PE=3 SV=1; Elongation factor 1-alpha OS=Candida albicans P78042 GN=MGS_00808 PE=3 SV=1; Elongation factor 1-alpha OS=Can…			2	99	SGKVTGKTLLEAIDAIEPPTRPTDKPLRLPLQDVYK		missed K-V@3; missed K-T@7; missed R-L@28	-0.019303	3959.19	660.872	3959.21	660.876	6	20	1.1.1.2188.10	1	33.5742	3614.49	33.6336
1	93.17	93.17	63.97	63.97	63.97	tr|C4YDJ3|C4YDJ3_CANAW; tr|A0A0A6Q741|A0A0A6Q741_CANAL; tr|A0A0A6M7H0|A0A0A6M7H0_CANAL; tr|A0A0A6M386|A0A0A6M386_CANAX; tr|A0A0A6LGT0|A0A0A6LGT0_CANAX; tr|A0A0A6L5Y0|A0A0A6L5Y0_CANAX; tr|A0A0A6L1C0|A0A0A6L1C0_CANAX; tr|A0A0A6KWM0|A0A0A6KWM0_CANAX; tr|A0A0A6K9D4|A0A0A6K9D4_CANAX; tr|A0A0A6K455|A0A0A6K455_CANAX; tr|A0A0A6JWU4|A0A0A6JWU4_CANAX; tr|A0A0A6J9A0|A0A0A6J9A0_CANAX; tr|A0A0A6J199|A0A0A6J19…	Elongation factor 1-alpha OS=Candida albicans (strain WO-1) GN=CAWG_00588 PE=3 SV=1; Elongation factor 1-alpha OS=Candida albicans (strain SC5314 / ATCC MYA-2876) GN=I503_00814 PE=3 SV=1; Elongation factor 1-alpha OS=Candida albicans (strain SC5314 / ATCC MYA-2876) GN=W5Q_02251 PE=3 SV=1; Elongation factor 1-alpha OS=Candida albicans P78042 GN=MGS_00808 PE=3 SV=1; Elongation factor 1-alpha OS=Can…			2	99	STTTGHLIYKCGGIDKR	Carbamidomethyl(C)@11	missed K-C@10; missed K-R@16	0.0014669	1905.97	477.501	1905.97	477.501	4	16	1.1.1.1584.3	1	9.5006	196.665	9.4646
1	93.17	93.17	63.97	63.97	63.97	tr|C4YDJ3|C4YDJ3_CANAW; tr|A0A0A6Q741|A0A0A6Q741_CANAL; tr|A0A0A6M7H0|A0A0A6M7H0_CANAL; tr|A0A0A6M386|A0A0A6M386_CANAX; tr|A0A0A6LGT0|A0A0A6LGT0_CANAX; tr|A0A0A6L5Y0|A0A0A6L5Y0_CANAX; tr|A0A0A6L1C0|A0A0A6L1C0_CANAX; tr|A0A0A6KWM0|A0A0A6KWM0_CANAX; tr|A0A0A6K9D4|A0A0A6K9D4_CANAX; tr|A0A0A6K455|A0A0A6K455_CANAX; tr|A0A0A6JWU4|A0A0A6JWU4_CANAX; tr|A0A0A6J9A0|A0A0A6J9A0_CANAX; tr|A0A0A6J199|A0A0A6J19…	Elongation factor 1-alpha OS=Candida albicans (strain WO-1) GN=CAWG_00588 PE=3 SV=1; Elongation factor 1-alpha OS=Candida albicans (strain SC5314 / ATCC MYA-2876) GN=I503_00814 PE=3 SV=1; Elongation factor 1-alpha OS=Candida albicans (strain SC5314 / ATCC MYA-2876) GN=W5Q_02251 PE=3 SV=1; Elongation factor 1-alpha OS=Candida albicans P78042 GN=MGS_00808 PE=3 SV=1; Elongation factor 1-alpha OS=Can…			2	99	SVEMHHEQLAEGVPGDNVGFNVK	Oxidation(M)@4		-0.00515921	2508.17	628.049	2508.17	628.05	4	22	1.1.1.1829.12	1	19.217	77390.2	18.7959
1	93.17	93.17	63.97	63.97	63.97	tr|C4YDJ3|C4YDJ3_CANAW; tr|A0A0A6Q741|A0A0A6Q741_CANAL; tr|A0A0A6M7H0|A0A0A6M7H0_CANAL; tr|A0A0A6M386|A0A0A6M386_CANAX; tr|A0A0A6LGT0|A0A0A6LGT0_CANAX; tr|A0A0A6L5Y0|A0A0A6L5Y0_CANAX; tr|A0A0A6L1C0|A0A0A6L1C0_CANAX; tr|A0A0A6KWM0|A0A0A6KWM0_CANAX; tr|A0A0A6K9D4|A0A0A6K9D4_CANAX; tr|A0A0A6K455|A0A0A6K455_CANAX; tr|A0A0A6JWU4|A0A0A6JWU4_CANAX; tr|A0A0A6J9A0|A0A0A6J9A0_CANAX; tr|A0A0A6J199|A0A0A6J19…	Elongation factor 1-alpha OS=Candida albicans (strain WO-1) GN=CAWG_00588 PE=3 SV=1; Elongation factor 1-alpha OS=Candida albicans (strain SC5314 / ATCC MYA-2876) GN=I503_00814 PE=3 SV=1; Elongation factor 1-alpha OS=Candida albicans (strain SC5314 / ATCC MYA-2876) GN=W5Q_02251 PE=3 SV=1; Elongation factor 1-alpha OS=Candida albicans P78042 GN=MGS_00808 PE=3 SV=1; Elongation factor 1-alpha OS=Can…			2	99	TGKKLEENPKFVK		missed K-K@3; missed K-L@4; missed K-F@10	-0.00477846	1516.86	380.221	1516.86	380.223	4	13	1.1.1.1345.2	1	6.6367	313.779	6.6751
1	93.17	93.17	63.97	63.97	63.97	tr|C4YDJ3|C4YDJ3_CANAW; tr|A0A0A6Q741|A0A0A6Q741_CANAL; tr|A0A0A6M7H0|A0A0A6M7H0_CANAL; tr|A0A0A6M386|A0A0A6M386_CANAX; tr|A0A0A6LGT0|A0A0A6LGT0_CANAX; tr|A0A0A6L5Y0|A0A0A6L5Y0_CANAX; tr|A0A0A6L1C0|A0A0A6L1C0_CANAX; tr|A0A0A6KWM0|A0A0A6KWM0_CANAX; tr|A0A0A6K9D4|A0A0A6K9D4_CANAX; tr|A0A0A6K455|A0A0A6K455_CANAX; tr|A0A0A6JWU4|A0A0A6JWU4_CANAX; tr|A0A0A6J9A0|A0A0A6J9A0_CANAX; tr|A0A0A6J199|A0A0A6J19…	Elongation factor 1-alpha OS=Candida albicans (strain WO-1) GN=CAWG_00588 PE=3 SV=1; Elongation factor 1-alpha OS=Candida albicans (strain SC5314 / ATCC MYA-2876) GN=I503_00814 PE=3 SV=1; Elongation factor 1-alpha OS=Candida albicans (strain SC5314 / ATCC MYA-2876) GN=W5Q_02251 PE=3 SV=1; Elongation factor 1-alpha OS=Candida albicans P78042 GN=MGS_00808 PE=3 SV=1; Elongation factor 1-alpha OS=Can…			2	99	TGKKLEENPKFVKSGDAAIVK		missed K-K@3; missed K-L@4; missed K-F@10; missed K-S@13	9.75918e-05	2258.26	452.66	2258.26	452.66	5	31	1.1.1.1611.3	1	10.4893	14755.7	10.3089
1	93.17	93.17	63.97	63.97	63.97	tr|C4YDJ3|C4YDJ3_CANAW; tr|A0A0A6Q741|A0A0A6Q741_CANAL; tr|A0A0A6M7H0|A0A0A6M7H0_CANAL; tr|A0A0A6M386|A0A0A6M386_CANAX; tr|A0A0A6LGT0|A0A0A6LGT0_CANAX; tr|A0A0A6L5Y0|A0A0A6L5Y0_CANAX; tr|A0A0A6L1C0|A0A0A6L1C0_CANAX; tr|A0A0A6KWM0|A0A0A6KWM0_CANAX; tr|A0A0A6K9D4|A0A0A6K9D4_CANAX; tr|A0A0A6K455|A0A0A6K455_CANAX; tr|A0A0A6JWU4|A0A0A6JWU4_CANAX; tr|A0A0A6J9A0|A0A0A6J9A0_CANAX; tr|A0A0A6J199|A0A0A6J19…	Elongation factor 1-alpha OS=Candida albicans (strain WO-1) GN=CAWG_00588 PE=3 SV=1; Elongation factor 1-alpha OS=Candida albicans (strain SC5314 / ATCC MYA-2876) GN=I503_00814 PE=3 SV=1; Elongation factor 1-alpha OS=Candida albicans (strain SC5314 / ATCC MYA-2876) GN=W5Q_02251 PE=3 SV=1; Elongation factor 1-alpha OS=Candida albicans P78042 GN=MGS_00808 PE=3 SV=1; Elongation factor 1-alpha OS=Can…			2	99	THVNVVVIGHVDSGK			-0.00612045	1559.84	520.953	1559.84	520.955	3	14	1.1.1.1808.7	1	18.3715	581.672	18.3557
1	93.17	93.17	63.97	63.97	63.97	tr|C4YDJ3|C4YDJ3_CANAW; tr|A0A0A6Q741|A0A0A6Q741_CANAL; tr|A0A0A6M7H0|A0A0A6M7H0_CANAL; tr|A0A0A6M386|A0A0A6M386_CANAX; tr|A0A0A6LGT0|A0A0A6LGT0_CANAX; tr|A0A0A6L5Y0|A0A0A6L5Y0_CANAX; tr|A0A0A6L1C0|A0A0A6L1C0_CANAX; tr|A0A0A6KWM0|A0A0A6KWM0_CANAX; tr|A0A0A6K9D4|A0A0A6K9D4_CANAX; tr|A0A0A6K455|A0A0A6K455_CANAX; tr|A0A0A6JWU4|A0A0A6JWU4_CANAX; tr|A0A0A6J9A0|A0A0A6J9A0_CANAX; tr|A0A0A6J199|A0A0A6J19…	Elongation factor 1-alpha OS=Candida albicans (strain WO-1) GN=CAWG_00588 PE=3 SV=1; Elongation factor 1-alpha OS=Candida albicans (strain SC5314 / ATCC MYA-2876) GN=I503_00814 PE=3 SV=1; Elongation factor 1-alpha OS=Candida albicans (strain SC5314 / ATCC MYA-2876) GN=W5Q_02251 PE=3 SV=1; Elongation factor 1-alpha OS=Candida albicans P78042 GN=MGS_00808 PE=3 SV=1; Elongation factor 1-alpha OS=Can…			2	99	THVNVVVIGHVDSGKSTTTGHLIYK		missed K-S@15	-0.00601575	2661.42	666.362	2661.42	666.363	4	16	1.1.1.1768.15	1	16.7765	1814.04	16.4667
1	93.17	93.17	63.97	63.97	63.97	tr|C4YDJ3|C4YDJ3_CANAW; tr|A0A0A6Q741|A0A0A6Q741_CANAL; tr|A0A0A6M7H0|A0A0A6M7H0_CANAL; tr|A0A0A6M386|A0A0A6M386_CANAX; tr|A0A0A6LGT0|A0A0A6LGT0_CANAX; tr|A0A0A6L5Y0|A0A0A6L5Y0_CANAX; tr|A0A0A6L1C0|A0A0A6L1C0_CANAX; tr|A0A0A6KWM0|A0A0A6KWM0_CANAX; tr|A0A0A6K9D4|A0A0A6K9D4_CANAX; tr|A0A0A6K455|A0A0A6K455_CANAX; tr|A0A0A6JWU4|A0A0A6JWU4_CANAX; tr|A0A0A6J9A0|A0A0A6J9A0_CANAX; tr|A0A0A6J199|A0A0A6J19…	Elongation factor 1-alpha OS=Candida albicans (strain WO-1) GN=CAWG_00588 PE=3 SV=1; Elongation factor 1-alpha OS=Candida albicans (strain SC5314 / ATCC MYA-2876) GN=I503_00814 PE=3 SV=1; Elongation factor 1-alpha OS=Candida albicans (strain SC5314 / ATCC MYA-2876) GN=W5Q_02251 PE=3 SV=1; Elongation factor 1-alpha OS=Candida albicans P78042 GN=MGS_00808 PE=3 SV=1; Elongation factor 1-alpha OS=Can…			2	99	TLLEAIDAIEPPTRPTDKPLRLPLQDVYK		missed R-L@21	-0.015651	3301.81	661.37	3301.83	661.373	5	17	1.1.1.2242.13	1	35.7369	12437.4	35.3525
1	93.17	93.17	63.97	63.97	63.97	tr|C4YDJ3|C4YDJ3_CANAW; tr|A0A0A6Q741|A0A0A6Q741_CANAL; tr|A0A0A6M7H0|A0A0A6M7H0_CANAL; tr|A0A0A6M386|A0A0A6M386_CANAX; tr|A0A0A6LGT0|A0A0A6LGT0_CANAX; tr|A0A0A6L5Y0|A0A0A6L5Y0_CANAX; tr|A0A0A6L1C0|A0A0A6L1C0_CANAX; tr|A0A0A6KWM0|A0A0A6KWM0_CANAX; tr|A0A0A6K9D4|A0A0A6K9D4_CANAX; tr|A0A0A6K455|A0A0A6K455_CANAX; tr|A0A0A6JWU4|A0A0A6JWU4_CANAX; tr|A0A0A6J9A0|A0A0A6J9A0_CANAX; tr|A0A0A6J199|A0A0A6J19…	Elongation factor 1-alpha OS=Candida albicans (strain WO-1) GN=CAWG_00588 PE=3 SV=1; Elongation factor 1-alpha OS=Candida albicans (strain SC5314 / ATCC MYA-2876) GN=I503_00814 PE=3 SV=1; Elongation factor 1-alpha OS=Candida albicans (strain SC5314 / ATCC MYA-2876) GN=W5Q_02251 PE=3 SV=1; Elongation factor 1-alpha OS=Candida albicans P78042 GN=MGS_00808 PE=3 SV=1; Elongation factor 1-alpha OS=Can…			2	99	VETGIIKAGMVVTFAPAGVTTEVK	Oxidation(M)@10	missed K-A@7	-0.000206765	2433.32	812.114	2433.32	812.114	3	27	1.1.1.2025.18	1	27.0534	7525.71	27.1798
1	93.17	93.17	63.97	63.97	63.97	tr|C4YDJ3|C4YDJ3_CANAW; tr|A0A0A6Q741|A0A0A6Q741_CANAL; tr|A0A0A6M7H0|A0A0A6M7H0_CANAL; tr|A0A0A6M386|A0A0A6M386_CANAX; tr|A0A0A6LGT0|A0A0A6LGT0_CANAX; tr|A0A0A6L5Y0|A0A0A6L5Y0_CANAX; tr|A0A0A6L1C0|A0A0A6L1C0_CANAX; tr|A0A0A6KWM0|A0A0A6KWM0_CANAX; tr|A0A0A6K9D4|A0A0A6K9D4_CANAX; tr|A0A0A6K455|A0A0A6K455_CANAX; tr|A0A0A6JWU4|A0A0A6JWU4_CANAX; tr|A0A0A6J9A0|A0A0A6J9A0_CANAX; tr|A0A0A6J199|A0A0A6J19…	Elongation factor 1-alpha OS=Candida albicans (strain WO-1) GN=CAWG_00588 PE=3 SV=1; Elongation factor 1-alpha OS=Candida albicans (strain SC5314 / ATCC MYA-2876) GN=I503_00814 PE=3 SV=1; Elongation factor 1-alpha OS=Candida albicans (strain SC5314 / ATCC MYA-2876) GN=W5Q_02251 PE=3 SV=1; Elongation factor 1-alpha OS=Candida albicans P78042 GN=MGS_00808 PE=3 SV=1; Elongation factor 1-alpha OS=Can…			2	99	VTGKTLLEAIDAIEPPTRPTDKPLRLPLQDVYK		missed K-T@4; missed R-L@25	-0.0149956	3687.05	738.417	3687.06	738.419	5	15	1.1.1.2235.13	1	35.4577	1807.58	35.2729
1	93.17	93.17	63.97	63.97	63.97	tr|C4YDJ3|C4YDJ3_CANAW; tr|A0A0A6Q741|A0A0A6Q741_CANAL; tr|A0A0A6M7H0|A0A0A6M7H0_CANAL; tr|A0A0A6M386|A0A0A6M386_CANAX; tr|A0A0A6LGT0|A0A0A6LGT0_CANAX; tr|A0A0A6L5Y0|A0A0A6L5Y0_CANAX; tr|A0A0A6L1C0|A0A0A6L1C0_CANAX; tr|A0A0A6KWM0|A0A0A6KWM0_CANAX; tr|A0A0A6K9D4|A0A0A6K9D4_CANAX; tr|A0A0A6K455|A0A0A6K455_CANAX; tr|A0A0A6JWU4|A0A0A6JWU4_CANAX; tr|A0A0A6J9A0|A0A0A6J9A0_CANAX; tr|A0A0A6J199|A0A0A6J19…	Elongation factor 1-alpha OS=Candida albicans (strain WO-1) GN=CAWG_00588 PE=3 SV=1; Elongation factor 1-alpha OS=Candida albicans (strain SC5314 / ATCC MYA-2876) GN=I503_00814 PE=3 SV=1; Elongation factor 1-alpha OS=Candida albicans (strain SC5314 / ATCC MYA-2876) GN=W5Q_02251 PE=3 SV=1; Elongation factor 1-alpha OS=Candida albicans P78042 GN=MGS_00808 PE=3 SV=1; Elongation factor 1-alpha OS=Can…			2	99	YAWVLDKLKAER		missed K-L@7; missed K-A@9	-0.00155449	1490.82	497.948	1490.82	497.949	3	12	1.1.1.1942.5	1	23.6994	1208.7	23.6871
1	93.17	93.17	63.97	63.97	63.97	tr|C4YDJ3|C4YDJ3_CANAW; tr|A0A0A6Q741|A0A0A6Q741_CANAL; tr|A0A0A6M7H0|A0A0A6M7H0_CANAL; tr|A0A0A6M386|A0A0A6M386_CANAX; tr|A0A0A6LGT0|A0A0A6LGT0_CANAX; tr|A0A0A6L5Y0|A0A0A6L5Y0_CANAX; tr|A0A0A6L1C0|A0A0A6L1C0_CANAX; tr|A0A0A6KWM0|A0A0A6KWM0_CANAX; tr|A0A0A6K9D4|A0A0A6K9D4_CANAX; tr|A0A0A6K455|A0A0A6K455_CANAX; tr|A0A0A6JWU4|A0A0A6JWU4_CANAX; tr|A0A0A6J9A0|A0A0A6J9A0_CANAX; tr|A0A0A6J199|A0A0A6J19…	Elongation factor 1-alpha OS=Candida albicans (strain WO-1) GN=CAWG_00588 PE=3 SV=1; Elongation factor 1-alpha OS=Candida albicans (strain SC5314 / ATCC MYA-2876) GN=I503_00814 PE=3 SV=1; Elongation factor 1-alpha OS=Candida albicans (strain SC5314 / ATCC MYA-2876) GN=W5Q_02251 PE=3 SV=1; Elongation factor 1-alpha OS=Candida albicans P78042 GN=MGS_00808 PE=3 SV=1; Elongation factor 1-alpha OS=Can…			2	99	YAWVLDKLKAERER		missed K-L@7; missed K-A@9; missed R-E@12	-0.00421694	1775.96	444.998	1775.97	444.999	4	14	1.1.1.1884.3	1	21.3979	3607.42	21.2689
1	93.17	93.17	63.97	63.97	63.97	tr|C4YDJ3|C4YDJ3_CANAW; tr|A0A0A6Q741|A0A0A6Q741_CANAL; tr|A0A0A6M7H0|A0A0A6M7H0_CANAL; tr|A0A0A6M386|A0A0A6M386_CANAX; tr|A0A0A6LGT0|A0A0A6LGT0_CANAX; tr|A0A0A6L5Y0|A0A0A6L5Y0_CANAX; tr|A0A0A6L1C0|A0A0A6L1C0_CANAX; tr|A0A0A6KWM0|A0A0A6KWM0_CANAX; tr|A0A0A6K9D4|A0A0A6K9D4_CANAX; tr|A0A0A6K455|A0A0A6K455_CANAX; tr|A0A0A6JWU4|A0A0A6JWU4_CANAX; tr|A0A0A6J9A0|A0A0A6J9A0_CANAX; tr|A0A0A6J199|A0A0A6J19…	Elongation factor 1-alpha OS=Candida albicans (strain WO-1) GN=CAWG_00588 PE=3 SV=1; Elongation factor 1-alpha OS=Candida albicans (strain SC5314 / ATCC MYA-2876) GN=I503_00814 PE=3 SV=1; Elongation factor 1-alpha OS=Candida albicans (strain SC5314 / ATCC MYA-2876) GN=W5Q_02251 PE=3 SV=1; Elongation factor 1-alpha OS=Candida albicans P78042 GN=MGS_00808 PE=3 SV=1; Elongation factor 1-alpha OS=Can…			2	99	YHVTVIDAPGHRDFIK		missed R-D@12	0.00199843	1866.98	467.751	1866.97	467.751	4	11	1.1.1.1773.7	1	16.9638	710.126	16.948
1	93.17	93.17	63.97	63.97	63.97	tr|C4YDJ3|C4YDJ3_CANAW; tr|A0A0A6Q741|A0A0A6Q741_CANAL; tr|A0A0A6M7H0|A0A0A6M7H0_CANAL; tr|A0A0A6M386|A0A0A6M386_CANAX; tr|A0A0A6LGT0|A0A0A6LGT0_CANAX; tr|A0A0A6L5Y0|A0A0A6L5Y0_CANAX; tr|A0A0A6L1C0|A0A0A6L1C0_CANAX; tr|A0A0A6KWM0|A0A0A6KWM0_CANAX; tr|A0A0A6K9D4|A0A0A6K9D4_CANAX; tr|A0A0A6K455|A0A0A6K455_CANAX; tr|A0A0A6JWU4|A0A0A6JWU4_CANAX; tr|A0A0A6J9A0|A0A0A6J9A0_CANAX; tr|A0A0A6J199|A0A0A6J19…	Elongation factor 1-alpha OS=Candida albicans (strain WO-1) GN=CAWG_00588 PE=3 SV=1; Elongation factor 1-alpha OS=Candida albicans (strain SC5314 / ATCC MYA-2876) GN=I503_00814 PE=3 SV=1; Elongation factor 1-alpha OS=Candida albicans (strain SC5314 / ATCC MYA-2876) GN=W5Q_02251 PE=3 SV=1; Elongation factor 1-alpha OS=Candida albicans P78042 GN=MGS_00808 PE=3 SV=1; Elongation factor 1-alpha OS=Can…			1.95861	99	MVPTKPMCVEAFTDYPPLGRFAVR	Oxidation(M)@1; Oxidation(M)@7; Carbamidomethyl(C)@8	missed R-F@20	0.00581638	2813.38	704.351	2813.37	704.35	4	14	1.1.1.2062.16	1	28.5344	1378.41	28.4232
1	93.17	93.17	63.97	63.97	63.97	tr|C4YDJ3|C4YDJ3_CANAW; tr|A0A0A6Q741|A0A0A6Q741_CANAL; tr|A0A0A6M7H0|A0A0A6M7H0_CANAL; tr|A0A0A6M386|A0A0A6M386_CANAX; tr|A0A0A6LGT0|A0A0A6LGT0_CANAX; tr|A0A0A6L5Y0|A0A0A6L5Y0_CANAX; tr|A0A0A6L1C0|A0A0A6L1C0_CANAX; tr|A0A0A6KWM0|A0A0A6KWM0_CANAX; tr|A0A0A6K9D4|A0A0A6K9D4_CANAX; tr|A0A0A6K455|A0A0A6K455_CANAX; tr|A0A0A6JWU4|A0A0A6JWU4_CANAX; tr|A0A0A6J9A0|A0A0A6J9A0_CANAX; tr|A0A0A6J199|A0A0A6J19…	Elongation factor 1-alpha OS=Candida albicans (strain WO-1) GN=CAWG_00588 PE=3 SV=1; Elongation factor 1-alpha OS=Candida albicans (strain SC5314 / ATCC MYA-2876) GN=I503_00814 PE=3 SV=1; Elongation factor 1-alpha OS=Candida albicans (strain SC5314 / ATCC MYA-2876) GN=W5Q_02251 PE=3 SV=1; Elongation factor 1-alpha OS=Candida albicans P78042 GN=MGS_00808 PE=3 SV=1; Elongation factor 1-alpha OS=Can…			1.50864	99	DMRQTVAVGVIK	Oxidation(M)@2	missed R-Q@3	0.000248924	1331.72	444.915	1331.72	444.915	3	8	1.1.1.1699.2	1	13.9842	346.28	13.8969
1	93.17	93.17	63.97	63.97	63.97	tr|C4YDJ3|C4YDJ3_CANAW; tr|A0A0A6Q741|A0A0A6Q741_CANAL; tr|A0A0A6M7H0|A0A0A6M7H0_CANAL; tr|A0A0A6M386|A0A0A6M386_CANAX; tr|A0A0A6LGT0|A0A0A6LGT0_CANAX; tr|A0A0A6L5Y0|A0A0A6L5Y0_CANAX; tr|A0A0A6L1C0|A0A0A6L1C0_CANAX; tr|A0A0A6KWM0|A0A0A6KWM0_CANAX; tr|A0A0A6K9D4|A0A0A6K9D4_CANAX; tr|A0A0A6K455|A0A0A6K455_CANAX; tr|A0A0A6JWU4|A0A0A6JWU4_CANAX; tr|A0A0A6J9A0|A0A0A6J9A0_CANAX; tr|A0A0A6J199|A0A0A6J19…	Elongation factor 1-alpha OS=Candida albicans (strain WO-1) GN=CAWG_00588 PE=3 SV=1; Elongation factor 1-alpha OS=Candida albicans (strain SC5314 / ATCC MYA-2876) GN=I503_00814 PE=3 SV=1; Elongation factor 1-alpha OS=Candida albicans (strain SC5314 / ATCC MYA-2876) GN=W5Q_02251 PE=3 SV=1; Elongation factor 1-alpha OS=Candida albicans P78042 GN=MGS_00808 PE=3 SV=1; Elongation factor 1-alpha OS=Can…			0.453457	98.92	IGGIGTVPVGRVETGIIKAG		cleaved G-M@C-term; missed R-V@11; missed K-A@18	-0.00701342	1893.1	632.04	1893.1	632.042	3	11	1.1.1.1987.11	1	25.5133	577.623	25.4909
1	93.17	93.17	63.97	63.97	63.97	tr|C4YDJ3|C4YDJ3_CANAW; tr|A0A0A6Q741|A0A0A6Q741_CANAL; tr|A0A0A6M7H0|A0A0A6M7H0_CANAL; tr|A0A0A6M386|A0A0A6M386_CANAX; tr|A0A0A6LGT0|A0A0A6LGT0_CANAX; tr|A0A0A6L5Y0|A0A0A6L5Y0_CANAX; tr|A0A0A6L1C0|A0A0A6L1C0_CANAX; tr|A0A0A6KWM0|A0A0A6KWM0_CANAX; tr|A0A0A6K9D4|A0A0A6K9D4_CANAX; tr|A0A0A6K455|A0A0A6K455_CANAX; tr|A0A0A6JWU4|A0A0A6JWU4_CANAX; tr|A0A0A6J9A0|A0A0A6J9A0_CANAX; tr|A0A0A6J199|A0A0A6J19…	Elongation factor 1-alpha OS=Candida albicans (strain WO-1) GN=CAWG_00588 PE=3 SV=1; Elongation factor 1-alpha OS=Candida albicans (strain SC5314 / ATCC MYA-2876) GN=I503_00814 PE=3 SV=1; Elongation factor 1-alpha OS=Candida albicans (strain SC5314 / ATCC MYA-2876) GN=W5Q_02251 PE=3 SV=1; Elongation factor 1-alpha OS=Candida albicans P78042 GN=MGS_00808 PE=3 SV=1; Elongation factor 1-alpha OS=Can…			0.272459	99	EMHHEQLAEGVPGDNVGFNVK	Oxidation(M)@2	cleaved V-E@N-term	-0.00856867	2322.06	581.523	2322.07	581.525	4	18	1.1.1.1817.9	1	18.7355	2148.06	18.6371
1	93.17	93.17	63.97	63.97	63.97	tr|C4YDJ3|C4YDJ3_CANAW; tr|A0A0A6Q741|A0A0A6Q741_CANAL; tr|A0A0A6M7H0|A0A0A6M7H0_CANAL; tr|A0A0A6M386|A0A0A6M386_CANAX; tr|A0A0A6LGT0|A0A0A6LGT0_CANAX; tr|A0A0A6L5Y0|A0A0A6L5Y0_CANAX; tr|A0A0A6L1C0|A0A0A6L1C0_CANAX; tr|A0A0A6KWM0|A0A0A6KWM0_CANAX; tr|A0A0A6K9D4|A0A0A6K9D4_CANAX; tr|A0A0A6K455|A0A0A6K455_CANAX; tr|A0A0A6JWU4|A0A0A6JWU4_CANAX; tr|A0A0A6J9A0|A0A0A6J9A0_CANAX; tr|A0A0A6J199|A0A0A6J19…	Elongation factor 1-alpha OS=Candida albicans (strain WO-1) GN=CAWG_00588 PE=3 SV=1; Elongation factor 1-alpha OS=Candida albicans (strain SC5314 / ATCC MYA-2876) GN=I503_00814 PE=3 SV=1; Elongation factor 1-alpha OS=Candida albicans (strain SC5314 / ATCC MYA-2876) GN=W5Q_02251 PE=3 SV=1; Elongation factor 1-alpha OS=Candida albicans P78042 GN=MGS_00808 PE=3 SV=1; Elongation factor 1-alpha OS=Can…			0.270835	96.88	TGKKLEENPKFVKSGDAAIVKMVPTKPMCVEAFTDYPPLGR	Oxidation(M)@22; Oxidation(M)@28; Carbamidomethyl(C)@29	missed K-K@3; missed K-L@4; missed K-F@10; missed K-S@13; missed K-M@21	-0.0150017	4580.33	764.396	4580.35	764.399	6	11	1.1.1.1917.18	1	22.7253	1420.93	22.6921
1	93.17	93.17	63.97	63.97	63.97	tr|C4YDJ3|C4YDJ3_CANAW; tr|A0A0A6Q741|A0A0A6Q741_CANAL; tr|A0A0A6M7H0|A0A0A6M7H0_CANAL; tr|A0A0A6M386|A0A0A6M386_CANAX; tr|A0A0A6LGT0|A0A0A6LGT0_CANAX; tr|A0A0A6L5Y0|A0A0A6L5Y0_CANAX; tr|A0A0A6L1C0|A0A0A6L1C0_CANAX; tr|A0A0A6KWM0|A0A0A6KWM0_CANAX; tr|A0A0A6K9D4|A0A0A6K9D4_CANAX; tr|A0A0A6K455|A0A0A6K455_CANAX; tr|A0A0A6JWU4|A0A0A6JWU4_CANAX; tr|A0A0A6J9A0|A0A0A6J9A0_CANAX; tr|A0A0A6J199|A0A0A6J19…	Elongation factor 1-alpha OS=Candida albicans (strain WO-1) GN=CAWG_00588 PE=3 SV=1; Elongation factor 1-alpha OS=Candida albicans (strain SC5314 / ATCC MYA-2876) GN=I503_00814 PE=3 SV=1; Elongation factor 1-alpha OS=Candida albicans (strain SC5314 / ATCC MYA-2876) GN=W5Q_02251 PE=3 SV=1; Elongation factor 1-alpha OS=Candida albicans P78042 GN=MGS_00808 PE=3 SV=1; Elongation factor 1-alpha OS=Can…			0.153663	99	QLAEGVPGDNVGFNVK		cleaved E-Q@N-term	-0.00358311	1642.83	822.421	1642.83	822.423	2	12	1.1.1.1920.19	1	22.8454	1001.51	22.6921
1	93.17	93.17	63.97	63.97	63.97	tr|C4YDJ3|C4YDJ3_CANAW; tr|A0A0A6Q741|A0A0A6Q741_CANAL; tr|A0A0A6M7H0|A0A0A6M7H0_CANAL; tr|A0A0A6M386|A0A0A6M386_CANAX; tr|A0A0A6LGT0|A0A0A6LGT0_CANAX; tr|A0A0A6L5Y0|A0A0A6L5Y0_CANAX; tr|A0A0A6L1C0|A0A0A6L1C0_CANAX; tr|A0A0A6KWM0|A0A0A6KWM0_CANAX; tr|A0A0A6K9D4|A0A0A6K9D4_CANAX; tr|A0A0A6K455|A0A0A6K455_CANAX; tr|A0A0A6JWU4|A0A0A6JWU4_CANAX; tr|A0A0A6J9A0|A0A0A6J9A0_CANAX; tr|A0A0A6J199|A0A0A6J19…	Elongation factor 1-alpha OS=Candida albicans (strain WO-1) GN=CAWG_00588 PE=3 SV=1; Elongation factor 1-alpha OS=Candida albicans (strain SC5314 / ATCC MYA-2876) GN=I503_00814 PE=3 SV=1; Elongation factor 1-alpha OS=Candida albicans (strain SC5314 / ATCC MYA-2876) GN=W5Q_02251 PE=3 SV=1; Elongation factor 1-alpha OS=Candida albicans P78042 GN=MGS_00808 PE=3 SV=1; Elongation factor 1-alpha OS=Can…			0.118615	99	GKEKTHVNVVVIGHVDSGK	Trimethyl(K)@4	cleaved M-G@N-term; missed K-E@2; missed K-T@4	-0.00117742	2044.14	512.043	2044.14	512.043	4	20	1.1.1.1613.4	1	10.5695	284.102	10.4646
1	93.17	93.17	63.97	63.97	63.97	tr|C4YDJ3|C4YDJ3_CANAW; tr|A0A0A6Q741|A0A0A6Q741_CANAL; tr|A0A0A6M7H0|A0A0A6M7H0_CANAL; tr|A0A0A6M386|A0A0A6M386_CANAX; tr|A0A0A6LGT0|A0A0A6LGT0_CANAX; tr|A0A0A6L5Y0|A0A0A6L5Y0_CANAX; tr|A0A0A6L1C0|A0A0A6L1C0_CANAX; tr|A0A0A6KWM0|A0A0A6KWM0_CANAX; tr|A0A0A6K9D4|A0A0A6K9D4_CANAX; tr|A0A0A6K455|A0A0A6K455_CANAX; tr|A0A0A6JWU4|A0A0A6JWU4_CANAX; tr|A0A0A6J9A0|A0A0A6J9A0_CANAX; tr|A0A0A6J199|A0A0A6J19…	Elongation factor 1-alpha OS=Candida albicans (strain WO-1) GN=CAWG_00588 PE=3 SV=1; Elongation factor 1-alpha OS=Candida albicans (strain SC5314 / ATCC MYA-2876) GN=I503_00814 PE=3 SV=1; Elongation factor 1-alpha OS=Candida albicans (strain SC5314 / ATCC MYA-2876) GN=W5Q_02251 PE=3 SV=1; Elongation factor 1-alpha OS=Candida albicans P78042 GN=MGS_00808 PE=3 SV=1; Elongation factor 1-alpha OS=Can…			0.114074	99	SVEMHHEQLAEGVPGDNVGFNVKNVSVKEIR	Trimethyl(K)@28	missed K-N@23; missed K-E@28	-0.0109237	3459.75	577.632	3459.76	577.633	6	19	1.1.1.1900.11	1	22.0448	1491.55	21.9426
1	93.17	93.17	63.97	63.97	63.97	tr|C4YDJ3|C4YDJ3_CANAW; tr|A0A0A6Q741|A0A0A6Q741_CANAL; tr|A0A0A6M7H0|A0A0A6M7H0_CANAL; tr|A0A0A6M386|A0A0A6M386_CANAX; tr|A0A0A6LGT0|A0A0A6LGT0_CANAX; tr|A0A0A6L5Y0|A0A0A6L5Y0_CANAX; tr|A0A0A6L1C0|A0A0A6L1C0_CANAX; tr|A0A0A6KWM0|A0A0A6KWM0_CANAX; tr|A0A0A6K9D4|A0A0A6K9D4_CANAX; tr|A0A0A6K455|A0A0A6K455_CANAX; tr|A0A0A6JWU4|A0A0A6JWU4_CANAX; tr|A0A0A6J9A0|A0A0A6J9A0_CANAX; tr|A0A0A6J199|A0A0A6J19…	Elongation factor 1-alpha OS=Candida albicans (strain WO-1) GN=CAWG_00588 PE=3 SV=1; Elongation factor 1-alpha OS=Candida albicans (strain SC5314 / ATCC MYA-2876) GN=I503_00814 PE=3 SV=1; Elongation factor 1-alpha OS=Candida albicans (strain SC5314 / ATCC MYA-2876) GN=W5Q_02251 PE=3 SV=1; Elongation factor 1-alpha OS=Candida albicans P78042 GN=MGS_00808 PE=3 SV=1; Elongation factor 1-alpha OS=Can…			0.111259	99	GKEKTHVNVVVIGHVDSGKSTTTGHLIYK	Trimethyl(K)@4	cleaved M-G@N-term; missed K-E@2; missed K-T@4; missed K-S@19	-0.00957855	3145.72	630.15	3145.72	630.152	5	20	1.1.1.1693.14	1	13.7643	857.834	13.777
1	93.17	93.17	63.97	63.97	63.97	tr|C4YDJ3|C4YDJ3_CANAW; tr|A0A0A6Q741|A0A0A6Q741_CANAL; tr|A0A0A6M7H0|A0A0A6M7H0_CANAL; tr|A0A0A6M386|A0A0A6M386_CANAX; tr|A0A0A6LGT0|A0A0A6LGT0_CANAX; tr|A0A0A6L5Y0|A0A0A6L5Y0_CANAX; tr|A0A0A6L1C0|A0A0A6L1C0_CANAX; tr|A0A0A6KWM0|A0A0A6KWM0_CANAX; tr|A0A0A6K9D4|A0A0A6K9D4_CANAX; tr|A0A0A6K455|A0A0A6K455_CANAX; tr|A0A0A6JWU4|A0A0A6JWU4_CANAX; tr|A0A0A6J9A0|A0A0A6J9A0_CANAX; tr|A0A0A6J199|A0A0A6J19…	Elongation factor 1-alpha OS=Candida albicans (strain WO-1) GN=CAWG_00588 PE=3 SV=1; Elongation factor 1-alpha OS=Candida albicans (strain SC5314 / ATCC MYA-2876) GN=I503_00814 PE=3 SV=1; Elongation factor 1-alpha OS=Candida albicans (strain SC5314 / ATCC MYA-2876) GN=W5Q_02251 PE=3 SV=1; Elongation factor 1-alpha OS=Candida albicans P78042 GN=MGS_00808 PE=3 SV=1; Elongation factor 1-alpha OS=Can…			0.0366845	82.63	DMRQTVAVGVIKSVEK	Oxidation(M)@2; Deamidated(Q)@4	missed R-Q@3; missed K-S@12	0.00229615	1775.95	592.99	1775.95	592.989	3	9	1.1.1.1808.14	1	18.3832	1277.34	18.4362
1	93.17	93.17	63.97	63.97	63.97	tr|C4YDJ3|C4YDJ3_CANAW; tr|A0A0A6Q741|A0A0A6Q741_CANAL; tr|A0A0A6M7H0|A0A0A6M7H0_CANAL; tr|A0A0A6M386|A0A0A6M386_CANAX; tr|A0A0A6LGT0|A0A0A6LGT0_CANAX; tr|A0A0A6L5Y0|A0A0A6L5Y0_CANAX; tr|A0A0A6L1C0|A0A0A6L1C0_CANAX; tr|A0A0A6KWM0|A0A0A6KWM0_CANAX; tr|A0A0A6K9D4|A0A0A6K9D4_CANAX; tr|A0A0A6K455|A0A0A6K455_CANAX; tr|A0A0A6JWU4|A0A0A6JWU4_CANAX; tr|A0A0A6J9A0|A0A0A6J9A0_CANAX; tr|A0A0A6J199|A0A0A6J19…	Elongation factor 1-alpha OS=Candida albicans (strain WO-1) GN=CAWG_00588 PE=3 SV=1; Elongation factor 1-alpha OS=Candida albicans (strain SC5314 / ATCC MYA-2876) GN=I503_00814 PE=3 SV=1; Elongation factor 1-alpha OS=Candida albicans (strain SC5314 / ATCC MYA-2876) GN=W5Q_02251 PE=3 SV=1; Elongation factor 1-alpha OS=Candida albicans P78042 GN=MGS_00808 PE=3 SV=1; Elongation factor 1-alpha OS=Can…			0.02365	99	TIEKFEKEAAELGKGSFK	Lys-add@N-term	missed K-F@4; missed K-E@7; missed K-G@14	-0.0416059	2139.12	535.786	2139.16	535.797	4	14	1.1.1.1870.9	1	20.8543	16237.4	21.0331
1	93.17	93.17	63.97	63.97	63.97	tr|C4YDJ3|C4YDJ3_CANAW; tr|A0A0A6Q741|A0A0A6Q741_CANAL; tr|A0A0A6M7H0|A0A0A6M7H0_CANAL; tr|A0A0A6M386|A0A0A6M386_CANAX; tr|A0A0A6LGT0|A0A0A6LGT0_CANAX; tr|A0A0A6L5Y0|A0A0A6L5Y0_CANAX; tr|A0A0A6L1C0|A0A0A6L1C0_CANAX; tr|A0A0A6KWM0|A0A0A6KWM0_CANAX; tr|A0A0A6K9D4|A0A0A6K9D4_CANAX; tr|A0A0A6K455|A0A0A6K455_CANAX; tr|A0A0A6JWU4|A0A0A6JWU4_CANAX; tr|A0A0A6J9A0|A0A0A6J9A0_CANAX; tr|A0A0A6J199|A0A0A6J19…	Elongation factor 1-alpha OS=Candida albicans (strain WO-1) GN=CAWG_00588 PE=3 SV=1; Elongation factor 1-alpha OS=Candida albicans (strain SC5314 / ATCC MYA-2876) GN=I503_00814 PE=3 SV=1; Elongation factor 1-alpha OS=Candida albicans (strain SC5314 / ATCC MYA-2876) GN=W5Q_02251 PE=3 SV=1; Elongation factor 1-alpha OS=Candida albicans P78042 GN=MGS_00808 PE=3 SV=1; Elongation factor 1-alpha OS=Can…			0.0218195	99	SVEMHHEQLAEGVPGDNVGFNVKNVSVKEIRR	Oxidation(M)@4; Trimethyl(K)@28	missed K-N@23; missed K-E@28; missed R-R@31	-0.0128045	3631.84	606.314	3631.85	606.316	6	19	1.1.1.1827.11	1	19.1352	22204.3	19.3131
1	93.17	93.17	63.97	63.97	63.97	tr|C4YDJ3|C4YDJ3_CANAW; tr|A0A0A6Q741|A0A0A6Q741_CANAL; tr|A0A0A6M7H0|A0A0A6M7H0_CANAL; tr|A0A0A6M386|A0A0A6M386_CANAX; tr|A0A0A6LGT0|A0A0A6LGT0_CANAX; tr|A0A0A6L5Y0|A0A0A6L5Y0_CANAX; tr|A0A0A6L1C0|A0A0A6L1C0_CANAX; tr|A0A0A6KWM0|A0A0A6KWM0_CANAX; tr|A0A0A6K9D4|A0A0A6K9D4_CANAX; tr|A0A0A6K455|A0A0A6K455_CANAX; tr|A0A0A6JWU4|A0A0A6JWU4_CANAX; tr|A0A0A6J9A0|A0A0A6J9A0_CANAX; tr|A0A0A6J199|A0A0A6J19…	Elongation factor 1-alpha OS=Candida albicans (strain WO-1) GN=CAWG_00588 PE=3 SV=1; Elongation factor 1-alpha OS=Candida albicans (strain SC5314 / ATCC MYA-2876) GN=I503_00814 PE=3 SV=1; Elongation factor 1-alpha OS=Candida albicans (strain SC5314 / ATCC MYA-2876) GN=W5Q_02251 PE=3 SV=1; Elongation factor 1-alpha OS=Candida albicans P78042 GN=MGS_00808 PE=3 SV=1; Elongation factor 1-alpha OS=Can…			0.0209071	99	DMRQTVAVGVIKSVEKSDKAGKVTKAAQKAAKK	Oxidation(M)@2; Trimethyl(K)@33	missed R-Q@3; missed K-S@12; missed K-S@16; missed K-A@19; missed K-V@22; missed K-A@25; missed K-A@29; missed K-K@32	-0.0112923	3528.01	589.009	3528.02	589.01	6	20	1.1.1.1741.15	1	15.691	836.59	15.823
1	93.17	93.17	63.97	63.97	63.97	tr|C4YDJ3|C4YDJ3_CANAW; tr|A0A0A6Q741|A0A0A6Q741_CANAL; tr|A0A0A6M7H0|A0A0A6M7H0_CANAL; tr|A0A0A6M386|A0A0A6M386_CANAX; tr|A0A0A6LGT0|A0A0A6LGT0_CANAX; tr|A0A0A6L5Y0|A0A0A6L5Y0_CANAX; tr|A0A0A6L1C0|A0A0A6L1C0_CANAX; tr|A0A0A6KWM0|A0A0A6KWM0_CANAX; tr|A0A0A6K9D4|A0A0A6K9D4_CANAX; tr|A0A0A6K455|A0A0A6K455_CANAX; tr|A0A0A6JWU4|A0A0A6JWU4_CANAX; tr|A0A0A6J9A0|A0A0A6J9A0_CANAX; tr|A0A0A6J199|A0A0A6J19…	Elongation factor 1-alpha OS=Candida albicans (strain WO-1) GN=CAWG_00588 PE=3 SV=1; Elongation factor 1-alpha OS=Candida albicans (strain SC5314 / ATCC MYA-2876) GN=I503_00814 PE=3 SV=1; Elongation factor 1-alpha OS=Candida albicans (strain SC5314 / ATCC MYA-2876) GN=W5Q_02251 PE=3 SV=1; Elongation factor 1-alpha OS=Candida albicans P78042 GN=MGS_00808 PE=3 SV=1; Elongation factor 1-alpha OS=Can…			0.0172766	99	QTVAVGVIKSVEKSDKAGKVTKAAQKAAKK	Gln->pyro-Glu@N-term; Trimethyl(K)@30	missed K-S@9; missed K-S@13; missed K-A@16; missed K-V@19; missed K-A@22; missed K-A@26; missed K-K@29	-0.00956582	3092.82	516.477	3092.83	516.479	6	14	1.1.1.1793.9	1	17.7707	1443.11	17.7515
1	93.17	93.17	63.97	63.97	63.97	tr|C4YDJ3|C4YDJ3_CANAW; tr|A0A0A6Q741|A0A0A6Q741_CANAL; tr|A0A0A6M7H0|A0A0A6M7H0_CANAL; tr|A0A0A6M386|A0A0A6M386_CANAX; tr|A0A0A6LGT0|A0A0A6LGT0_CANAX; tr|A0A0A6L5Y0|A0A0A6L5Y0_CANAX; tr|A0A0A6L1C0|A0A0A6L1C0_CANAX; tr|A0A0A6KWM0|A0A0A6KWM0_CANAX; tr|A0A0A6K9D4|A0A0A6K9D4_CANAX; tr|A0A0A6K455|A0A0A6K455_CANAX; tr|A0A0A6JWU4|A0A0A6JWU4_CANAX; tr|A0A0A6J9A0|A0A0A6J9A0_CANAX; tr|A0A0A6J199|A0A0A6J19…	Elongation factor 1-alpha OS=Candida albicans (strain WO-1) GN=CAWG_00588 PE=3 SV=1; Elongation factor 1-alpha OS=Candida albicans (strain SC5314 / ATCC MYA-2876) GN=I503_00814 PE=3 SV=1; Elongation factor 1-alpha OS=Candida albicans (strain SC5314 / ATCC MYA-2876) GN=W5Q_02251 PE=3 SV=1; Elongation factor 1-alpha OS=Candida albicans P78042 GN=MGS_00808 PE=3 SV=1; Elongation factor 1-alpha OS=Can…			0.00788851	99	HEQLAEGVPGDNVGFNVKNVSVKEIR	Trimethyl(K)@23	cleaved H-H@N-term; missed K-N@18; missed K-E@23	-0.00426706	2876.51	576.309	2876.51	576.31	5	18	1.1.1.1902.11	1	22.1248	2228.71	22.1425
1	93.17	93.17	63.97	63.97	63.97	tr|C4YDJ3|C4YDJ3_CANAW; tr|A0A0A6Q741|A0A0A6Q741_CANAL; tr|A0A0A6M7H0|A0A0A6M7H0_CANAL; tr|A0A0A6M386|A0A0A6M386_CANAX; tr|A0A0A6LGT0|A0A0A6LGT0_CANAX; tr|A0A0A6L5Y0|A0A0A6L5Y0_CANAX; tr|A0A0A6L1C0|A0A0A6L1C0_CANAX; tr|A0A0A6KWM0|A0A0A6KWM0_CANAX; tr|A0A0A6K9D4|A0A0A6K9D4_CANAX; tr|A0A0A6K455|A0A0A6K455_CANAX; tr|A0A0A6JWU4|A0A0A6JWU4_CANAX; tr|A0A0A6J9A0|A0A0A6J9A0_CANAX; tr|A0A0A6J199|A0A0A6J19…	Elongation factor 1-alpha OS=Candida albicans (strain WO-1) GN=CAWG_00588 PE=3 SV=1; Elongation factor 1-alpha OS=Candida albicans (strain SC5314 / ATCC MYA-2876) GN=I503_00814 PE=3 SV=1; Elongation factor 1-alpha OS=Candida albicans (strain SC5314 / ATCC MYA-2876) GN=W5Q_02251 PE=3 SV=1; Elongation factor 1-alpha OS=Candida albicans P78042 GN=MGS_00808 PE=3 SV=1; Elongation factor 1-alpha OS=Can…			0.00348833	98.54	TIEKFEKEAAELGK	Lys-add@N-term	missed K-F@4; missed K-E@7	-0.0377161	1719.9	574.308	1719.94	574.321	3	12	1.1.1.1786.13	1	17.4964	11932.2	17.4707
1	93.17	93.17	63.97	63.97	63.97	tr|C4YDJ3|C4YDJ3_CANAW; tr|A0A0A6Q741|A0A0A6Q741_CANAL; tr|A0A0A6M7H0|A0A0A6M7H0_CANAL; tr|A0A0A6M386|A0A0A6M386_CANAX; tr|A0A0A6LGT0|A0A0A6LGT0_CANAX; tr|A0A0A6L5Y0|A0A0A6L5Y0_CANAX; tr|A0A0A6L1C0|A0A0A6L1C0_CANAX; tr|A0A0A6KWM0|A0A0A6KWM0_CANAX; tr|A0A0A6K9D4|A0A0A6K9D4_CANAX; tr|A0A0A6K455|A0A0A6K455_CANAX; tr|A0A0A6JWU4|A0A0A6JWU4_CANAX; tr|A0A0A6J9A0|A0A0A6J9A0_CANAX; tr|A0A0A6J199|A0A0A6J19…	Elongation factor 1-alpha OS=Candida albicans (strain WO-1) GN=CAWG_00588 PE=3 SV=1; Elongation factor 1-alpha OS=Candida albicans (strain SC5314 / ATCC MYA-2876) GN=I503_00814 PE=3 SV=1; Elongation factor 1-alpha OS=Candida albicans (strain SC5314 / ATCC MYA-2876) GN=W5Q_02251 PE=3 SV=1; Elongation factor 1-alpha OS=Candida albicans P78042 GN=MGS_00808 PE=3 SV=1; Elongation factor 1-alpha OS=Can…			0.00261362	99	KEKTHVNVVVIGHVDSGK	Octanoyl(T)@4; Deamidated(N)@7	cleaved G-K@N-term; missed K-E@1; missed K-T@3	0.00948976	2072.17	519.05	2072.16	519.048	4	16	1.1.1.1595.5	1	9.868	413.533	9.9518
1	93.17	93.17	63.97	63.97	63.97	tr|C4YDJ3|C4YDJ3_CANAW; tr|A0A0A6Q741|A0A0A6Q741_CANAL; tr|A0A0A6M7H0|A0A0A6M7H0_CANAL; tr|A0A0A6M386|A0A0A6M386_CANAX; tr|A0A0A6LGT0|A0A0A6LGT0_CANAX; tr|A0A0A6L5Y0|A0A0A6L5Y0_CANAX; tr|A0A0A6L1C0|A0A0A6L1C0_CANAX; tr|A0A0A6KWM0|A0A0A6KWM0_CANAX; tr|A0A0A6K9D4|A0A0A6K9D4_CANAX; tr|A0A0A6K455|A0A0A6K455_CANAX; tr|A0A0A6JWU4|A0A0A6JWU4_CANAX; tr|A0A0A6J9A0|A0A0A6J9A0_CANAX; tr|A0A0A6J199|A0A0A6J19…	Elongation factor 1-alpha OS=Candida albicans (strain WO-1) GN=CAWG_00588 PE=3 SV=1; Elongation factor 1-alpha OS=Candida albicans (strain SC5314 / ATCC MYA-2876) GN=I503_00814 PE=3 SV=1; Elongation factor 1-alpha OS=Candida albicans (strain SC5314 / ATCC MYA-2876) GN=W5Q_02251 PE=3 SV=1; Elongation factor 1-alpha OS=Candida albicans P78042 GN=MGS_00808 PE=3 SV=1; Elongation factor 1-alpha OS=Can…			0.00217692	97.57	TLLEAIDAIEPPTRPTDKPLR	Oxidation(P)@12; Deamidated(R)@14		0.0146684	2362.29	591.58	2362.27	591.576	4	12	1.1.1.2082.6	1	29.3192	569.137	29.3453
1	93.17	93.17	63.97	63.97	63.97	tr|C4YDJ3|C4YDJ3_CANAW; tr|A0A0A6Q741|A0A0A6Q741_CANAL; tr|A0A0A6M7H0|A0A0A6M7H0_CANAL; tr|A0A0A6M386|A0A0A6M386_CANAX; tr|A0A0A6LGT0|A0A0A6LGT0_CANAX; tr|A0A0A6L5Y0|A0A0A6L5Y0_CANAX; tr|A0A0A6L1C0|A0A0A6L1C0_CANAX; tr|A0A0A6KWM0|A0A0A6KWM0_CANAX; tr|A0A0A6K9D4|A0A0A6K9D4_CANAX; tr|A0A0A6K455|A0A0A6K455_CANAX; tr|A0A0A6JWU4|A0A0A6JWU4_CANAX; tr|A0A0A6J9A0|A0A0A6J9A0_CANAX; tr|A0A0A6J199|A0A0A6J19…	Elongation factor 1-alpha OS=Candida albicans (strain WO-1) GN=CAWG_00588 PE=3 SV=1; Elongation factor 1-alpha OS=Candida albicans (strain SC5314 / ATCC MYA-2876) GN=I503_00814 PE=3 SV=1; Elongation factor 1-alpha OS=Candida albicans (strain SC5314 / ATCC MYA-2876) GN=W5Q_02251 PE=3 SV=1; Elongation factor 1-alpha OS=Candida albicans P78042 GN=MGS_00808 PE=3 SV=1; Elongation factor 1-alpha OS=Can…			0.000869459	97.34	EKFEKEAAELGKGSFK	GlnThrGlyGly(K)@5	cleaved I-E@N-term; missed K-F@2; missed K-E@5; missed K-G@12	0.0249027	2140.1	536.034	2140.08	536.027	4	12	1.1.1.1910.4	1	22.4276	2885.66	22.4179
1	93.17	93.17	63.97	63.97	63.97	tr|C4YDJ3|C4YDJ3_CANAW; tr|A0A0A6Q741|A0A0A6Q741_CANAL; tr|A0A0A6M7H0|A0A0A6M7H0_CANAL; tr|A0A0A6M386|A0A0A6M386_CANAX; tr|A0A0A6LGT0|A0A0A6LGT0_CANAX; tr|A0A0A6L5Y0|A0A0A6L5Y0_CANAX; tr|A0A0A6L1C0|A0A0A6L1C0_CANAX; tr|A0A0A6KWM0|A0A0A6KWM0_CANAX; tr|A0A0A6K9D4|A0A0A6K9D4_CANAX; tr|A0A0A6K455|A0A0A6K455_CANAX; tr|A0A0A6JWU4|A0A0A6JWU4_CANAX; tr|A0A0A6J9A0|A0A0A6J9A0_CANAX; tr|A0A0A6J199|A0A0A6J19…	Elongation factor 1-alpha OS=Candida albicans (strain WO-1) GN=CAWG_00588 PE=3 SV=1; Elongation factor 1-alpha OS=Candida albicans (strain SC5314 / ATCC MYA-2876) GN=I503_00814 PE=3 SV=1; Elongation factor 1-alpha OS=Candida albicans (strain SC5314 / ATCC MYA-2876) GN=W5Q_02251 PE=3 SV=1; Elongation factor 1-alpha OS=Candida albicans P78042 GN=MGS_00808 PE=3 SV=1; Elongation factor 1-alpha OS=Can…			0.000434512	96.01	AEGVPGDNVGFNVKNVSVKEIR	Trimethyl(K)@14	cleaved L-A@N-term; missed K-N@14; missed K-E@19	0.00526413	2369.28	593.326	2369.27	593.325	4	12	1.1.1.1892.5	1	21.7213	1102.73	21.7847
1	93.17	93.17	63.97	63.97	63.97	tr|C4YDJ3|C4YDJ3_CANAW; tr|A0A0A6Q741|A0A0A6Q741_CANAL; tr|A0A0A6M7H0|A0A0A6M7H0_CANAL; tr|A0A0A6M386|A0A0A6M386_CANAX; tr|A0A0A6LGT0|A0A0A6LGT0_CANAX; tr|A0A0A6L5Y0|A0A0A6L5Y0_CANAX; tr|A0A0A6L1C0|A0A0A6L1C0_CANAX; tr|A0A0A6KWM0|A0A0A6KWM0_CANAX; tr|A0A0A6K9D4|A0A0A6K9D4_CANAX; tr|A0A0A6K455|A0A0A6K455_CANAX; tr|A0A0A6JWU4|A0A0A6JWU4_CANAX; tr|A0A0A6J9A0|A0A0A6J9A0_CANAX; tr|A0A0A6J199|A0A0A6J19…	Elongation factor 1-alpha OS=Candida albicans (strain WO-1) GN=CAWG_00588 PE=3 SV=1; Elongation factor 1-alpha OS=Candida albicans (strain SC5314 / ATCC MYA-2876) GN=I503_00814 PE=3 SV=1; Elongation factor 1-alpha OS=Candida albicans (strain SC5314 / ATCC MYA-2876) GN=W5Q_02251 PE=3 SV=1; Elongation factor 1-alpha OS=Candida albicans P78042 GN=MGS_00808 PE=3 SV=1; Elongation factor 1-alpha OS=Can…			0.000434512	71.35	FEKEAAELGKGSFK	GlnGlnGlnThrGlyGly(K)@3	missed K-E@3; missed K-G@10	0.0563172	2139.12	535.786	2139.06	535.772	4	10	1.1.1.1880.8	1	21.2462	16237.4	21.0331
1	93.17	93.17	63.97	63.97	63.97	tr|C4YDJ3|C4YDJ3_CANAW; tr|A0A0A6Q741|A0A0A6Q741_CANAL; tr|A0A0A6M7H0|A0A0A6M7H0_CANAL; tr|A0A0A6M386|A0A0A6M386_CANAX; tr|A0A0A6LGT0|A0A0A6LGT0_CANAX; tr|A0A0A6L5Y0|A0A0A6L5Y0_CANAX; tr|A0A0A6L1C0|A0A0A6L1C0_CANAX; tr|A0A0A6KWM0|A0A0A6KWM0_CANAX; tr|A0A0A6K9D4|A0A0A6K9D4_CANAX; tr|A0A0A6K455|A0A0A6K455_CANAX; tr|A0A0A6JWU4|A0A0A6JWU4_CANAX; tr|A0A0A6J9A0|A0A0A6J9A0_CANAX; tr|A0A0A6J199|A0A0A6J19…	Elongation factor 1-alpha OS=Candida albicans (strain WO-1) GN=CAWG_00588 PE=3 SV=1; Elongation factor 1-alpha OS=Candida albicans (strain SC5314 / ATCC MYA-2876) GN=I503_00814 PE=3 SV=1; Elongation factor 1-alpha OS=Candida albicans (strain SC5314 / ATCC MYA-2876) GN=W5Q_02251 PE=3 SV=1; Elongation factor 1-alpha OS=Candida albicans P78042 GN=MGS_00808 PE=3 SV=1; Elongation factor 1-alpha OS=Can…			0.000434512	99	GVTTEVKSVEMHHEQLAEGVPGDNVGFNVK	Oxidation(K)@7	cleaved A-G@N-term; missed K-S@7	0.00731589	3222.57	806.649	3222.56	806.648	4	19	1.1.1.1903.17	1	22.1747	1149.87	22.1824
1	93.17	93.17	63.97	63.97	63.97	tr|C4YDJ3|C4YDJ3_CANAW; tr|A0A0A6Q741|A0A0A6Q741_CANAL; tr|A0A0A6M7H0|A0A0A6M7H0_CANAL; tr|A0A0A6M386|A0A0A6M386_CANAX; tr|A0A0A6LGT0|A0A0A6LGT0_CANAX; tr|A0A0A6L5Y0|A0A0A6L5Y0_CANAX; tr|A0A0A6L1C0|A0A0A6L1C0_CANAX; tr|A0A0A6KWM0|A0A0A6KWM0_CANAX; tr|A0A0A6K9D4|A0A0A6K9D4_CANAX; tr|A0A0A6K455|A0A0A6K455_CANAX; tr|A0A0A6JWU4|A0A0A6JWU4_CANAX; tr|A0A0A6J9A0|A0A0A6J9A0_CANAX; tr|A0A0A6J199|A0A0A6J19…	Elongation factor 1-alpha OS=Candida albicans (strain WO-1) GN=CAWG_00588 PE=3 SV=1; Elongation factor 1-alpha OS=Candida albicans (strain SC5314 / ATCC MYA-2876) GN=I503_00814 PE=3 SV=1; Elongation factor 1-alpha OS=Candida albicans (strain SC5314 / ATCC MYA-2876) GN=W5Q_02251 PE=3 SV=1; Elongation factor 1-alpha OS=Candida albicans P78042 GN=MGS_00808 PE=3 SV=1; Elongation factor 1-alpha OS=Can…			0.000434512	92.08	PGDNVGFNVKNVSVKEIR	Trimethyl(K)@15	cleaved V-P@N-term; missed K-N@10; missed K-E@15	0.00255326	2013.1	504.283	2013.1	504.282	4	11	1.1.1.1870.4	1	20.846	1506.79	20.9544
1	93.17	93.17	63.97	63.97	63.97	tr|C4YDJ3|C4YDJ3_CANAW; tr|A0A0A6Q741|A0A0A6Q741_CANAL; tr|A0A0A6M7H0|A0A0A6M7H0_CANAL; tr|A0A0A6M386|A0A0A6M386_CANAX; tr|A0A0A6LGT0|A0A0A6LGT0_CANAX; tr|A0A0A6L5Y0|A0A0A6L5Y0_CANAX; tr|A0A0A6L1C0|A0A0A6L1C0_CANAX; tr|A0A0A6KWM0|A0A0A6KWM0_CANAX; tr|A0A0A6K9D4|A0A0A6K9D4_CANAX; tr|A0A0A6K455|A0A0A6K455_CANAX; tr|A0A0A6JWU4|A0A0A6JWU4_CANAX; tr|A0A0A6J9A0|A0A0A6J9A0_CANAX; tr|A0A0A6J199|A0A0A6J19…	Elongation factor 1-alpha OS=Candida albicans (strain WO-1) GN=CAWG_00588 PE=3 SV=1; Elongation factor 1-alpha OS=Candida albicans (strain SC5314 / ATCC MYA-2876) GN=I503_00814 PE=3 SV=1; Elongation factor 1-alpha OS=Candida albicans (strain SC5314 / ATCC MYA-2876) GN=W5Q_02251 PE=3 SV=1; Elongation factor 1-alpha OS=Candida albicans P78042 GN=MGS_00808 PE=3 SV=1; Elongation factor 1-alpha OS=Can…			0	99	AGMVVTFAPAGVTTEVK	Oxidation(M)@3		0.00210375	1692.88	847.446	1692.88	847.445	2	19	1.1.1.1930.17	1	23.2403	18427.6	23.4873
1	93.17	93.17	63.97	63.97	63.97	tr|C4YDJ3|C4YDJ3_CANAW; tr|A0A0A6Q741|A0A0A6Q741_CANAL; tr|A0A0A6M7H0|A0A0A6M7H0_CANAL; tr|A0A0A6M386|A0A0A6M386_CANAX; tr|A0A0A6LGT0|A0A0A6LGT0_CANAX; tr|A0A0A6L5Y0|A0A0A6L5Y0_CANAX; tr|A0A0A6L1C0|A0A0A6L1C0_CANAX; tr|A0A0A6KWM0|A0A0A6KWM0_CANAX; tr|A0A0A6K9D4|A0A0A6K9D4_CANAX; tr|A0A0A6K455|A0A0A6K455_CANAX; tr|A0A0A6JWU4|A0A0A6JWU4_CANAX; tr|A0A0A6J9A0|A0A0A6J9A0_CANAX; tr|A0A0A6J199|A0A0A6J19…	Elongation factor 1-alpha OS=Candida albicans (strain WO-1) GN=CAWG_00588 PE=3 SV=1; Elongation factor 1-alpha OS=Candida albicans (strain SC5314 / ATCC MYA-2876) GN=I503_00814 PE=3 SV=1; Elongation factor 1-alpha OS=Candida albicans (strain SC5314 / ATCC MYA-2876) GN=W5Q_02251 PE=3 SV=1; Elongation factor 1-alpha OS=Candida albicans P78042 GN=MGS_00808 PE=3 SV=1; Elongation factor 1-alpha OS=Can…			0	99	AGMVVTFAPAGVTTEVK	Oxidation(M)@3		0.00210375	1692.88	847.446	1692.88	847.445	2	19	1.1.1.1933.19	1	23.3633	18427.6	23.4873
1	93.17	93.17	63.97	63.97	63.97	tr|C4YDJ3|C4YDJ3_CANAW; tr|A0A0A6Q741|A0A0A6Q741_CANAL; tr|A0A0A6M7H0|A0A0A6M7H0_CANAL; tr|A0A0A6M386|A0A0A6M386_CANAX; tr|A0A0A6LGT0|A0A0A6LGT0_CANAX; tr|A0A0A6L5Y0|A0A0A6L5Y0_CANAX; tr|A0A0A6L1C0|A0A0A6L1C0_CANAX; tr|A0A0A6KWM0|A0A0A6KWM0_CANAX; tr|A0A0A6K9D4|A0A0A6K9D4_CANAX; tr|A0A0A6K455|A0A0A6K455_CANAX; tr|A0A0A6JWU4|A0A0A6JWU4_CANAX; tr|A0A0A6J9A0|A0A0A6J9A0_CANAX; tr|A0A0A6J199|A0A0A6J19…	Elongation factor 1-alpha OS=Candida albicans (strain WO-1) GN=CAWG_00588 PE=3 SV=1; Elongation factor 1-alpha OS=Candida albicans (strain SC5314 / ATCC MYA-2876) GN=I503_00814 PE=3 SV=1; Elongation factor 1-alpha OS=Candida albicans (strain SC5314 / ATCC MYA-2876) GN=W5Q_02251 PE=3 SV=1; Elongation factor 1-alpha OS=Candida albicans P78042 GN=MGS_00808 PE=3 SV=1; Elongation factor 1-alpha OS=Can…			0	99	AGMVVTFAPAGVTTEVK	Oxidation(M)@3		0.00210375	1692.88	847.446	1692.88	847.445	2	21	1.1.1.1936.19	1	23.4829	18427.6	23.4873
1	93.17	93.17	63.97	63.97	63.97	tr|C4YDJ3|C4YDJ3_CANAW; tr|A0A0A6Q741|A0A0A6Q741_CANAL; tr|A0A0A6M7H0|A0A0A6M7H0_CANAL; tr|A0A0A6M386|A0A0A6M386_CANAX; tr|A0A0A6LGT0|A0A0A6LGT0_CANAX; tr|A0A0A6L5Y0|A0A0A6L5Y0_CANAX; tr|A0A0A6L1C0|A0A0A6L1C0_CANAX; tr|A0A0A6KWM0|A0A0A6KWM0_CANAX; tr|A0A0A6K9D4|A0A0A6K9D4_CANAX; tr|A0A0A6K455|A0A0A6K455_CANAX; tr|A0A0A6JWU4|A0A0A6JWU4_CANAX; tr|A0A0A6J9A0|A0A0A6J9A0_CANAX; tr|A0A0A6J199|A0A0A6J19…	Elongation factor 1-alpha OS=Candida albicans (strain WO-1) GN=CAWG_00588 PE=3 SV=1; Elongation factor 1-alpha OS=Candida albicans (strain SC5314 / ATCC MYA-2876) GN=I503_00814 PE=3 SV=1; Elongation factor 1-alpha OS=Candida albicans (strain SC5314 / ATCC MYA-2876) GN=W5Q_02251 PE=3 SV=1; Elongation factor 1-alpha OS=Candida albicans P78042 GN=MGS_00808 PE=3 SV=1; Elongation factor 1-alpha OS=Can…			0	99	AGMVVTFAPAGVTTEVK	Oxidation(M)@3		0.00210375	1692.88	847.446	1692.88	847.445	2	21	1.1.1.1939.18	1	23.6011	18427.6	23.4873
1	93.17	93.17	63.97	63.97	63.97	tr|C4YDJ3|C4YDJ3_CANAW; tr|A0A0A6Q741|A0A0A6Q741_CANAL; tr|A0A0A6M7H0|A0A0A6M7H0_CANAL; tr|A0A0A6M386|A0A0A6M386_CANAX; tr|A0A0A6LGT0|A0A0A6LGT0_CANAX; tr|A0A0A6L5Y0|A0A0A6L5Y0_CANAX; tr|A0A0A6L1C0|A0A0A6L1C0_CANAX; tr|A0A0A6KWM0|A0A0A6KWM0_CANAX; tr|A0A0A6K9D4|A0A0A6K9D4_CANAX; tr|A0A0A6K455|A0A0A6K455_CANAX; tr|A0A0A6JWU4|A0A0A6JWU4_CANAX; tr|A0A0A6J9A0|A0A0A6J9A0_CANAX; tr|A0A0A6J199|A0A0A6J19…	Elongation factor 1-alpha OS=Candida albicans (strain WO-1) GN=CAWG_00588 PE=3 SV=1; Elongation factor 1-alpha OS=Candida albicans (strain SC5314 / ATCC MYA-2876) GN=I503_00814 PE=3 SV=1; Elongation factor 1-alpha OS=Candida albicans (strain SC5314 / ATCC MYA-2876) GN=W5Q_02251 PE=3 SV=1; Elongation factor 1-alpha OS=Candida albicans P78042 GN=MGS_00808 PE=3 SV=1; Elongation factor 1-alpha OS=Can…			0	99	AGMVVTFAPAGVTTEVK	Oxidation(M)@3		0.00210375	1692.88	847.446	1692.88	847.445	2	16	1.1.1.1945.18	1	23.8411	18427.6	23.4873
1	93.17	93.17	63.97	63.97	63.97	tr|C4YDJ3|C4YDJ3_CANAW; tr|A0A0A6Q741|A0A0A6Q741_CANAL; tr|A0A0A6M7H0|A0A0A6M7H0_CANAL; tr|A0A0A6M386|A0A0A6M386_CANAX; tr|A0A0A6LGT0|A0A0A6LGT0_CANAX; tr|A0A0A6L5Y0|A0A0A6L5Y0_CANAX; tr|A0A0A6L1C0|A0A0A6L1C0_CANAX; tr|A0A0A6KWM0|A0A0A6KWM0_CANAX; tr|A0A0A6K9D4|A0A0A6K9D4_CANAX; tr|A0A0A6K455|A0A0A6K455_CANAX; tr|A0A0A6JWU4|A0A0A6JWU4_CANAX; tr|A0A0A6J9A0|A0A0A6J9A0_CANAX; tr|A0A0A6J199|A0A0A6J19…	Elongation factor 1-alpha OS=Candida albicans (strain WO-1) GN=CAWG_00588 PE=3 SV=1; Elongation factor 1-alpha OS=Candida albicans (strain SC5314 / ATCC MYA-2876) GN=I503_00814 PE=3 SV=1; Elongation factor 1-alpha OS=Candida albicans (strain SC5314 / ATCC MYA-2876) GN=W5Q_02251 PE=3 SV=1; Elongation factor 1-alpha OS=Candida albicans P78042 GN=MGS_00808 PE=3 SV=1; Elongation factor 1-alpha OS=Can…			0	26.44	AGMVVTFAPAGVTTEVK	Oxidation(M)@3		0.000432503	1692.88	565.299	1692.88	565.299	3	8	1.1.1.1931.7	1	23.2635	3434.54	23.4873
1	93.17	93.17	63.97	63.97	63.97	tr|C4YDJ3|C4YDJ3_CANAW; tr|A0A0A6Q741|A0A0A6Q741_CANAL; tr|A0A0A6M7H0|A0A0A6M7H0_CANAL; tr|A0A0A6M386|A0A0A6M386_CANAX; tr|A0A0A6LGT0|A0A0A6LGT0_CANAX; tr|A0A0A6L5Y0|A0A0A6L5Y0_CANAX; tr|A0A0A6L1C0|A0A0A6L1C0_CANAX; tr|A0A0A6KWM0|A0A0A6KWM0_CANAX; tr|A0A0A6K9D4|A0A0A6K9D4_CANAX; tr|A0A0A6K455|A0A0A6K455_CANAX; tr|A0A0A6JWU4|A0A0A6JWU4_CANAX; tr|A0A0A6J9A0|A0A0A6J9A0_CANAX; tr|A0A0A6J199|A0A0A6J19…	Elongation factor 1-alpha OS=Candida albicans (strain WO-1) GN=CAWG_00588 PE=3 SV=1; Elongation factor 1-alpha OS=Candida albicans (strain SC5314 / ATCC MYA-2876) GN=I503_00814 PE=3 SV=1; Elongation factor 1-alpha OS=Candida albicans (strain SC5314 / ATCC MYA-2876) GN=W5Q_02251 PE=3 SV=1; Elongation factor 1-alpha OS=Candida albicans P78042 GN=MGS_00808 PE=3 SV=1; Elongation factor 1-alpha OS=Can…			0	71.37	APAGVTTEVKSVEMHHEQLAEGVPGDNVGFNVKNVSVKEIR	Oxidation(M)@14; Trimethyl(K)@38	cleaved F-A@N-term; missed K-S@10; missed K-N@33; missed K-E@38	-0.0233172	4429.25	739.215	4429.27	739.219	6	12	1.1.1.1959.17	1	24.4004	1218.41	24.4082
1	93.17	93.17	63.97	63.97	63.97	tr|C4YDJ3|C4YDJ3_CANAW; tr|A0A0A6Q741|A0A0A6Q741_CANAL; tr|A0A0A6M7H0|A0A0A6M7H0_CANAL; tr|A0A0A6M386|A0A0A6M386_CANAX; tr|A0A0A6LGT0|A0A0A6LGT0_CANAX; tr|A0A0A6L5Y0|A0A0A6L5Y0_CANAX; tr|A0A0A6L1C0|A0A0A6L1C0_CANAX; tr|A0A0A6KWM0|A0A0A6KWM0_CANAX; tr|A0A0A6K9D4|A0A0A6K9D4_CANAX; tr|A0A0A6K455|A0A0A6K455_CANAX; tr|A0A0A6JWU4|A0A0A6JWU4_CANAX; tr|A0A0A6J9A0|A0A0A6J9A0_CANAX; tr|A0A0A6J199|A0A0A6J19…	Elongation factor 1-alpha OS=Candida albicans (strain WO-1) GN=CAWG_00588 PE=3 SV=1; Elongation factor 1-alpha OS=Candida albicans (strain SC5314 / ATCC MYA-2876) GN=I503_00814 PE=3 SV=1; Elongation factor 1-alpha OS=Candida albicans (strain SC5314 / ATCC MYA-2876) GN=W5Q_02251 PE=3 SV=1; Elongation factor 1-alpha OS=Candida albicans P78042 GN=MGS_00808 PE=3 SV=1; Elongation factor 1-alpha OS=Can…			0	99	DGQTREHALLAYTLGVK		missed R-E@5	-0.000618146	1870.99	624.67	1870.99	624.671	3	19	1.1.1.1964.15	1	24.5978	3929.18	24.6492
1	93.17	93.17	63.97	63.97	63.97	tr|C4YDJ3|C4YDJ3_CANAW; tr|A0A0A6Q741|A0A0A6Q741_CANAL; tr|A0A0A6M7H0|A0A0A6M7H0_CANAL; tr|A0A0A6M386|A0A0A6M386_CANAX; tr|A0A0A6LGT0|A0A0A6LGT0_CANAX; tr|A0A0A6L5Y0|A0A0A6L5Y0_CANAX; tr|A0A0A6L1C0|A0A0A6L1C0_CANAX; tr|A0A0A6KWM0|A0A0A6KWM0_CANAX; tr|A0A0A6K9D4|A0A0A6K9D4_CANAX; tr|A0A0A6K455|A0A0A6K455_CANAX; tr|A0A0A6JWU4|A0A0A6JWU4_CANAX; tr|A0A0A6J9A0|A0A0A6J9A0_CANAX; tr|A0A0A6J199|A0A0A6J19…	Elongation factor 1-alpha OS=Candida albicans (strain WO-1) GN=CAWG_00588 PE=3 SV=1; Elongation factor 1-alpha OS=Candida albicans (strain SC5314 / ATCC MYA-2876) GN=I503_00814 PE=3 SV=1; Elongation factor 1-alpha OS=Candida albicans (strain SC5314 / ATCC MYA-2876) GN=W5Q_02251 PE=3 SV=1; Elongation factor 1-alpha OS=Candida albicans P78042 GN=MGS_00808 PE=3 SV=1; Elongation factor 1-alpha OS=Can…			0	99	DGQTREHALLAYTLGVK		missed R-E@5	-0.000618146	1870.99	624.67	1870.99	624.671	3	21	1.1.1.1967.13	1	24.7151	3929.18	24.6492
1	93.17	93.17	63.97	63.97	63.97	tr|C4YDJ3|C4YDJ3_CANAW; tr|A0A0A6Q741|A0A0A6Q741_CANAL; tr|A0A0A6M7H0|A0A0A6M7H0_CANAL; tr|A0A0A6M386|A0A0A6M386_CANAX; tr|A0A0A6LGT0|A0A0A6LGT0_CANAX; tr|A0A0A6L5Y0|A0A0A6L5Y0_CANAX; tr|A0A0A6L1C0|A0A0A6L1C0_CANAX; tr|A0A0A6KWM0|A0A0A6KWM0_CANAX; tr|A0A0A6K9D4|A0A0A6K9D4_CANAX; tr|A0A0A6K455|A0A0A6K455_CANAX; tr|A0A0A6JWU4|A0A0A6JWU4_CANAX; tr|A0A0A6J9A0|A0A0A6J9A0_CANAX; tr|A0A0A6J199|A0A0A6J19…	Elongation factor 1-alpha OS=Candida albicans (strain WO-1) GN=CAWG_00588 PE=3 SV=1; Elongation factor 1-alpha OS=Candida albicans (strain SC5314 / ATCC MYA-2876) GN=I503_00814 PE=3 SV=1; Elongation factor 1-alpha OS=Candida albicans (strain SC5314 / ATCC MYA-2876) GN=W5Q_02251 PE=3 SV=1; Elongation factor 1-alpha OS=Candida albicans P78042 GN=MGS_00808 PE=3 SV=1; Elongation factor 1-alpha OS=Can…			0	97.4	DMRQTVAVGVIK	Oxidation(M)@2	missed R-Q@3	0.000248924	1331.72	444.915	1331.72	444.915	3	8	1.1.1.1696.3	1	13.8658	346.28	13.8969
1	93.17	93.17	63.97	63.97	63.97	tr|C4YDJ3|C4YDJ3_CANAW; tr|A0A0A6Q741|A0A0A6Q741_CANAL; tr|A0A0A6M7H0|A0A0A6M7H0_CANAL; tr|A0A0A6M386|A0A0A6M386_CANAX; tr|A0A0A6LGT0|A0A0A6LGT0_CANAX; tr|A0A0A6L5Y0|A0A0A6L5Y0_CANAX; tr|A0A0A6L1C0|A0A0A6L1C0_CANAX; tr|A0A0A6KWM0|A0A0A6KWM0_CANAX; tr|A0A0A6K9D4|A0A0A6K9D4_CANAX; tr|A0A0A6K455|A0A0A6K455_CANAX; tr|A0A0A6JWU4|A0A0A6JWU4_CANAX; tr|A0A0A6J9A0|A0A0A6J9A0_CANAX; tr|A0A0A6J199|A0A0A6J19…	Elongation factor 1-alpha OS=Candida albicans (strain WO-1) GN=CAWG_00588 PE=3 SV=1; Elongation factor 1-alpha OS=Candida albicans (strain SC5314 / ATCC MYA-2876) GN=I503_00814 PE=3 SV=1; Elongation factor 1-alpha OS=Candida albicans (strain SC5314 / ATCC MYA-2876) GN=W5Q_02251 PE=3 SV=1; Elongation factor 1-alpha OS=Candida albicans P78042 GN=MGS_00808 PE=3 SV=1; Elongation factor 1-alpha OS=Can…			0	99	DMRQTVAVGVIKSVEKSDK	Oxidation(M)@2	missed R-Q@3; missed K-S@12; missed K-S@16	-0.00304137	2105.11	527.285	2105.11	527.286	4	13	1.1.1.1807.8	1	18.333	2130.3	18.3557
1	93.17	93.17	63.97	63.97	63.97	tr|C4YDJ3|C4YDJ3_CANAW; tr|A0A0A6Q741|A0A0A6Q741_CANAL; tr|A0A0A6M7H0|A0A0A6M7H0_CANAL; tr|A0A0A6M386|A0A0A6M386_CANAX; tr|A0A0A6LGT0|A0A0A6LGT0_CANAX; tr|A0A0A6L5Y0|A0A0A6L5Y0_CANAX; tr|A0A0A6L1C0|A0A0A6L1C0_CANAX; tr|A0A0A6KWM0|A0A0A6KWM0_CANAX; tr|A0A0A6K9D4|A0A0A6K9D4_CANAX; tr|A0A0A6K455|A0A0A6K455_CANAX; tr|A0A0A6JWU4|A0A0A6JWU4_CANAX; tr|A0A0A6J9A0|A0A0A6J9A0_CANAX; tr|A0A0A6J199|A0A0A6J19…	Elongation factor 1-alpha OS=Candida albicans (strain WO-1) GN=CAWG_00588 PE=3 SV=1; Elongation factor 1-alpha OS=Candida albicans (strain SC5314 / ATCC MYA-2876) GN=I503_00814 PE=3 SV=1; Elongation factor 1-alpha OS=Candida albicans (strain SC5314 / ATCC MYA-2876) GN=W5Q_02251 PE=3 SV=1; Elongation factor 1-alpha OS=Candida albicans P78042 GN=MGS_00808 PE=3 SV=1; Elongation factor 1-alpha OS=Can…			0	95.72	DMRQTVAVGVIKSVEKSDK	Oxidation(M)@2	missed R-Q@3; missed K-S@12; missed K-S@16	-0.00304137	2105.11	527.285	2105.11	527.286	4	10	1.1.1.1804.5	1	18.2069	2130.3	18.3557
1	93.17	93.17	63.97	63.97	63.97	tr|C4YDJ3|C4YDJ3_CANAW; tr|A0A0A6Q741|A0A0A6Q741_CANAL; tr|A0A0A6M7H0|A0A0A6M7H0_CANAL; tr|A0A0A6M386|A0A0A6M386_CANAX; tr|A0A0A6LGT0|A0A0A6LGT0_CANAX; tr|A0A0A6L5Y0|A0A0A6L5Y0_CANAX; tr|A0A0A6L1C0|A0A0A6L1C0_CANAX; tr|A0A0A6KWM0|A0A0A6KWM0_CANAX; tr|A0A0A6K9D4|A0A0A6K9D4_CANAX; tr|A0A0A6K455|A0A0A6K455_CANAX; tr|A0A0A6JWU4|A0A0A6JWU4_CANAX; tr|A0A0A6J9A0|A0A0A6J9A0_CANAX; tr|A0A0A6J199|A0A0A6J19…	Elongation factor 1-alpha OS=Candida albicans (strain WO-1) GN=CAWG_00588 PE=3 SV=1; Elongation factor 1-alpha OS=Candida albicans (strain SC5314 / ATCC MYA-2876) GN=I503_00814 PE=3 SV=1; Elongation factor 1-alpha OS=Candida albicans (strain SC5314 / ATCC MYA-2876) GN=W5Q_02251 PE=3 SV=1; Elongation factor 1-alpha OS=Candida albicans P78042 GN=MGS_00808 PE=3 SV=1; Elongation factor 1-alpha OS=Can…			0	97.75	DMRQTVAVGVIKSVEKSDKAGK	Oxidation(M)@2	missed R-Q@3; missed K-S@12; missed K-S@16; missed K-A@19	-0.00178364	2361.27	473.261	2361.27	473.261	5	10	1.1.1.1775.6	1	17.0426	674.438	17.0686
1	93.17	93.17	63.97	63.97	63.97	tr|C4YDJ3|C4YDJ3_CANAW; tr|A0A0A6Q741|A0A0A6Q741_CANAL; tr|A0A0A6M7H0|A0A0A6M7H0_CANAL; tr|A0A0A6M386|A0A0A6M386_CANAX; tr|A0A0A6LGT0|A0A0A6LGT0_CANAX; tr|A0A0A6L5Y0|A0A0A6L5Y0_CANAX; tr|A0A0A6L1C0|A0A0A6L1C0_CANAX; tr|A0A0A6KWM0|A0A0A6KWM0_CANAX; tr|A0A0A6K9D4|A0A0A6K9D4_CANAX; tr|A0A0A6K455|A0A0A6K455_CANAX; tr|A0A0A6JWU4|A0A0A6JWU4_CANAX; tr|A0A0A6J9A0|A0A0A6J9A0_CANAX; tr|A0A0A6J199|A0A0A6J19…	Elongation factor 1-alpha OS=Candida albicans (strain WO-1) GN=CAWG_00588 PE=3 SV=1; Elongation factor 1-alpha OS=Candida albicans (strain SC5314 / ATCC MYA-2876) GN=I503_00814 PE=3 SV=1; Elongation factor 1-alpha OS=Candida albicans (strain SC5314 / ATCC MYA-2876) GN=W5Q_02251 PE=3 SV=1; Elongation factor 1-alpha OS=Candida albicans P78042 GN=MGS_00808 PE=3 SV=1; Elongation factor 1-alpha OS=Can…			0	99	DMRQTVAVGVIKSVEKSDKAGKVTK	Oxidation(M)@2	missed R-Q@3; missed K-S@12; missed K-S@16; missed K-A@19; missed K-V@22	-0.00257444	2689.48	673.376	2689.48	673.377	4	18	1.1.1.1757.15	1	16.335	2217.39	16.4265
1	93.17	93.17	63.97	63.97	63.97	tr|C4YDJ3|C4YDJ3_CANAW; tr|A0A0A6Q741|A0A0A6Q741_CANAL; tr|A0A0A6M7H0|A0A0A6M7H0_CANAL; tr|A0A0A6M386|A0A0A6M386_CANAX; tr|A0A0A6LGT0|A0A0A6LGT0_CANAX; tr|A0A0A6L5Y0|A0A0A6L5Y0_CANAX; tr|A0A0A6L1C0|A0A0A6L1C0_CANAX; tr|A0A0A6KWM0|A0A0A6KWM0_CANAX; tr|A0A0A6K9D4|A0A0A6K9D4_CANAX; tr|A0A0A6K455|A0A0A6K455_CANAX; tr|A0A0A6JWU4|A0A0A6JWU4_CANAX; tr|A0A0A6J9A0|A0A0A6J9A0_CANAX; tr|A0A0A6J199|A0A0A6J19…	Elongation factor 1-alpha OS=Candida albicans (strain WO-1) GN=CAWG_00588 PE=3 SV=1; Elongation factor 1-alpha OS=Candida albicans (strain SC5314 / ATCC MYA-2876) GN=I503_00814 PE=3 SV=1; Elongation factor 1-alpha OS=Candida albicans (strain SC5314 / ATCC MYA-2876) GN=W5Q_02251 PE=3 SV=1; Elongation factor 1-alpha OS=Candida albicans P78042 GN=MGS_00808 PE=3 SV=1; Elongation factor 1-alpha OS=Can…			0	99	DMRQTVAVGVIKSVEKSDKAGKVTK	Oxidation(M)@2	missed R-Q@3; missed K-S@12; missed K-S@16; missed K-A@19; missed K-V@22	-0.00528787	2689.47	538.902	2689.48	538.903	5	20	1.1.1.1760.9	1	16.4456	5354.64	16.4265
1	93.17	93.17	63.97	63.97	63.97	tr|C4YDJ3|C4YDJ3_CANAW; tr|A0A0A6Q741|A0A0A6Q741_CANAL; tr|A0A0A6M7H0|A0A0A6M7H0_CANAL; tr|A0A0A6M386|A0A0A6M386_CANAX; tr|A0A0A6LGT0|A0A0A6LGT0_CANAX; tr|A0A0A6L5Y0|A0A0A6L5Y0_CANAX; tr|A0A0A6L1C0|A0A0A6L1C0_CANAX; tr|A0A0A6KWM0|A0A0A6KWM0_CANAX; tr|A0A0A6K9D4|A0A0A6K9D4_CANAX; tr|A0A0A6K455|A0A0A6K455_CANAX; tr|A0A0A6JWU4|A0A0A6JWU4_CANAX; tr|A0A0A6J9A0|A0A0A6J9A0_CANAX; tr|A0A0A6J199|A0A0A6J19…	Elongation factor 1-alpha OS=Candida albicans (strain WO-1) GN=CAWG_00588 PE=3 SV=1; Elongation factor 1-alpha OS=Candida albicans (strain SC5314 / ATCC MYA-2876) GN=I503_00814 PE=3 SV=1; Elongation factor 1-alpha OS=Candida albicans (strain SC5314 / ATCC MYA-2876) GN=W5Q_02251 PE=3 SV=1; Elongation factor 1-alpha OS=Candida albicans P78042 GN=MGS_00808 PE=3 SV=1; Elongation factor 1-alpha OS=Can…			0	99	DMRQTVAVGVIKSVEKSDKAGKVTK	Oxidation(M)@2	missed R-Q@3; missed K-S@12; missed K-S@16; missed K-A@19; missed K-V@22	-0.00257444	2689.48	673.376	2689.48	673.377	4	21	1.1.1.1761.16	1	16.4974	2217.39	16.4265
1	93.17	93.17	63.97	63.97	63.97	tr|C4YDJ3|C4YDJ3_CANAW; tr|A0A0A6Q741|A0A0A6Q741_CANAL; tr|A0A0A6M7H0|A0A0A6M7H0_CANAL; tr|A0A0A6M386|A0A0A6M386_CANAX; tr|A0A0A6LGT0|A0A0A6LGT0_CANAX; tr|A0A0A6L5Y0|A0A0A6L5Y0_CANAX; tr|A0A0A6L1C0|A0A0A6L1C0_CANAX; tr|A0A0A6KWM0|A0A0A6KWM0_CANAX; tr|A0A0A6K9D4|A0A0A6K9D4_CANAX; tr|A0A0A6K455|A0A0A6K455_CANAX; tr|A0A0A6JWU4|A0A0A6JWU4_CANAX; tr|A0A0A6J9A0|A0A0A6J9A0_CANAX; tr|A0A0A6J199|A0A0A6J19…	Elongation factor 1-alpha OS=Candida albicans (strain WO-1) GN=CAWG_00588 PE=3 SV=1; Elongation factor 1-alpha OS=Candida albicans (strain SC5314 / ATCC MYA-2876) GN=I503_00814 PE=3 SV=1; Elongation factor 1-alpha OS=Candida albicans (strain SC5314 / ATCC MYA-2876) GN=W5Q_02251 PE=3 SV=1; Elongation factor 1-alpha OS=Candida albicans P78042 GN=MGS_00808 PE=3 SV=1; Elongation factor 1-alpha OS=Can…			0	99	DMRQTVAVGVIKSVEKSDKAGKVTK	Oxidation(M)@2	missed R-Q@3; missed K-S@12; missed K-S@16; missed K-A@19; missed K-V@22	-0.00257444	2689.48	673.376	2689.48	673.377	4	22	1.1.1.1762.18	1	16.5408	2217.39	16.4265
1	93.17	93.17	63.97	63.97	63.97	tr|C4YDJ3|C4YDJ3_CANAW; tr|A0A0A6Q741|A0A0A6Q741_CANAL; tr|A0A0A6M7H0|A0A0A6M7H0_CANAL; tr|A0A0A6M386|A0A0A6M386_CANAX; tr|A0A0A6LGT0|A0A0A6LGT0_CANAX; tr|A0A0A6L5Y0|A0A0A6L5Y0_CANAX; tr|A0A0A6L1C0|A0A0A6L1C0_CANAX; tr|A0A0A6KWM0|A0A0A6KWM0_CANAX; tr|A0A0A6K9D4|A0A0A6K9D4_CANAX; tr|A0A0A6K455|A0A0A6K455_CANAX; tr|A0A0A6JWU4|A0A0A6JWU4_CANAX; tr|A0A0A6J9A0|A0A0A6J9A0_CANAX; tr|A0A0A6J199|A0A0A6J19…	Elongation factor 1-alpha OS=Candida albicans (strain WO-1) GN=CAWG_00588 PE=3 SV=1; Elongation factor 1-alpha OS=Candida albicans (strain SC5314 / ATCC MYA-2876) GN=I503_00814 PE=3 SV=1; Elongation factor 1-alpha OS=Candida albicans (strain SC5314 / ATCC MYA-2876) GN=W5Q_02251 PE=3 SV=1; Elongation factor 1-alpha OS=Candida albicans P78042 GN=MGS_00808 PE=3 SV=1; Elongation factor 1-alpha OS=Can…			0	99	DMRQTVAVGVIKSVEKSDKAGKVTK	Oxidation(M)@2	missed R-Q@3; missed K-S@12; missed K-S@16; missed K-A@19; missed K-V@22	-0.00528787	2689.47	538.902	2689.48	538.903	5	22	1.1.1.1763.15	1	16.5758	5354.64	16.4265
1	93.17	93.17	63.97	63.97	63.97	tr|C4YDJ3|C4YDJ3_CANAW; tr|A0A0A6Q741|A0A0A6Q741_CANAL; tr|A0A0A6M7H0|A0A0A6M7H0_CANAL; tr|A0A0A6M386|A0A0A6M386_CANAX; tr|A0A0A6LGT0|A0A0A6LGT0_CANAX; tr|A0A0A6L5Y0|A0A0A6L5Y0_CANAX; tr|A0A0A6L1C0|A0A0A6L1C0_CANAX; tr|A0A0A6KWM0|A0A0A6KWM0_CANAX; tr|A0A0A6K9D4|A0A0A6K9D4_CANAX; tr|A0A0A6K455|A0A0A6K455_CANAX; tr|A0A0A6JWU4|A0A0A6JWU4_CANAX; tr|A0A0A6J9A0|A0A0A6J9A0_CANAX; tr|A0A0A6J199|A0A0A6J19…	Elongation factor 1-alpha OS=Candida albicans (strain WO-1) GN=CAWG_00588 PE=3 SV=1; Elongation factor 1-alpha OS=Candida albicans (strain SC5314 / ATCC MYA-2876) GN=I503_00814 PE=3 SV=1; Elongation factor 1-alpha OS=Candida albicans (strain SC5314 / ATCC MYA-2876) GN=W5Q_02251 PE=3 SV=1; Elongation factor 1-alpha OS=Candida albicans P78042 GN=MGS_00808 PE=3 SV=1; Elongation factor 1-alpha OS=Can…			0	99	DMRQTVAVGVIKSVEKSDKAGKVTK	Oxidation(M)@2	missed R-Q@3; missed K-S@12; missed K-S@16; missed K-A@19; missed K-V@22	-0.00257444	2689.48	673.376	2689.48	673.377	4	15	1.1.1.1765.19	1	16.6629	2217.39	16.4265
1	93.17	93.17	63.97	63.97	63.97	tr|C4YDJ3|C4YDJ3_CANAW; tr|A0A0A6Q741|A0A0A6Q741_CANAL; tr|A0A0A6M7H0|A0A0A6M7H0_CANAL; tr|A0A0A6M386|A0A0A6M386_CANAX; tr|A0A0A6LGT0|A0A0A6LGT0_CANAX; tr|A0A0A6L5Y0|A0A0A6L5Y0_CANAX; tr|A0A0A6L1C0|A0A0A6L1C0_CANAX; tr|A0A0A6KWM0|A0A0A6KWM0_CANAX; tr|A0A0A6K9D4|A0A0A6K9D4_CANAX; tr|A0A0A6K455|A0A0A6K455_CANAX; tr|A0A0A6JWU4|A0A0A6JWU4_CANAX; tr|A0A0A6J9A0|A0A0A6J9A0_CANAX; tr|A0A0A6J199|A0A0A6J19…	Elongation factor 1-alpha OS=Candida albicans (strain WO-1) GN=CAWG_00588 PE=3 SV=1; Elongation factor 1-alpha OS=Candida albicans (strain SC5314 / ATCC MYA-2876) GN=I503_00814 PE=3 SV=1; Elongation factor 1-alpha OS=Candida albicans (strain SC5314 / ATCC MYA-2876) GN=W5Q_02251 PE=3 SV=1; Elongation factor 1-alpha OS=Candida albicans P78042 GN=MGS_00808 PE=3 SV=1; Elongation factor 1-alpha OS=Can…			0	99	DMRQTVAVGVIKSVEKSDKAGKVTK	Oxidation(M)@2	missed R-Q@3; missed K-S@12; missed K-S@16; missed K-A@19; missed K-V@22	-0.00972052	2689.47	449.252	2689.48	449.254	6	11	1.1.1.1757.4	1	16.3167	2313.7	16.4265
1	93.17	93.17	63.97	63.97	63.97	tr|C4YDJ3|C4YDJ3_CANAW; tr|A0A0A6Q741|A0A0A6Q741_CANAL; tr|A0A0A6M7H0|A0A0A6M7H0_CANAL; tr|A0A0A6M386|A0A0A6M386_CANAX; tr|A0A0A6LGT0|A0A0A6LGT0_CANAX; tr|A0A0A6L5Y0|A0A0A6L5Y0_CANAX; tr|A0A0A6L1C0|A0A0A6L1C0_CANAX; tr|A0A0A6KWM0|A0A0A6KWM0_CANAX; tr|A0A0A6K9D4|A0A0A6K9D4_CANAX; tr|A0A0A6K455|A0A0A6K455_CANAX; tr|A0A0A6JWU4|A0A0A6JWU4_CANAX; tr|A0A0A6J9A0|A0A0A6J9A0_CANAX; tr|A0A0A6J199|A0A0A6J19…	Elongation factor 1-alpha OS=Candida albicans (strain WO-1) GN=CAWG_00588 PE=3 SV=1; Elongation factor 1-alpha OS=Candida albicans (strain SC5314 / ATCC MYA-2876) GN=I503_00814 PE=3 SV=1; Elongation factor 1-alpha OS=Candida albicans (strain SC5314 / ATCC MYA-2876) GN=W5Q_02251 PE=3 SV=1; Elongation factor 1-alpha OS=Candida albicans P78042 GN=MGS_00808 PE=3 SV=1; Elongation factor 1-alpha OS=Can…			0	99	DMRQTVAVGVIKSVEKSDKAGKVTK	Oxidation(M)@2; Deamidated(Q)@4	missed R-Q@3; missed K-S@12; missed K-S@16; missed K-A@19; missed K-V@22	-0.0106316	2690.45	539.098	2690.46	539.1	5	14	1.1.1.1805.6	1	18.2489	1519.26	18.2347
1	93.17	93.17	63.97	63.97	63.97	tr|C4YDJ3|C4YDJ3_CANAW; tr|A0A0A6Q741|A0A0A6Q741_CANAL; tr|A0A0A6M7H0|A0A0A6M7H0_CANAL; tr|A0A0A6M386|A0A0A6M386_CANAX; tr|A0A0A6LGT0|A0A0A6LGT0_CANAX; tr|A0A0A6L5Y0|A0A0A6L5Y0_CANAX; tr|A0A0A6L1C0|A0A0A6L1C0_CANAX; tr|A0A0A6KWM0|A0A0A6KWM0_CANAX; tr|A0A0A6K9D4|A0A0A6K9D4_CANAX; tr|A0A0A6K455|A0A0A6K455_CANAX; tr|A0A0A6JWU4|A0A0A6JWU4_CANAX; tr|A0A0A6J9A0|A0A0A6J9A0_CANAX; tr|A0A0A6J199|A0A0A6J19…	Elongation factor 1-alpha OS=Candida albicans (strain WO-1) GN=CAWG_00588 PE=3 SV=1; Elongation factor 1-alpha OS=Candida albicans (strain SC5314 / ATCC MYA-2876) GN=I503_00814 PE=3 SV=1; Elongation factor 1-alpha OS=Candida albicans (strain SC5314 / ATCC MYA-2876) GN=W5Q_02251 PE=3 SV=1; Elongation factor 1-alpha OS=Candida albicans P78042 GN=MGS_00808 PE=3 SV=1; Elongation factor 1-alpha OS=Can…			0	97	DMRQTVAVGVIKSVEKSDKAGKVTK	Oxidation(M)@2; Deamidated(Q)@4	missed R-Q@3; missed K-S@12; missed K-S@16; missed K-A@19; missed K-V@22	-0.00682325	2690.46	449.417	2690.46	449.418	6	10	1.1.1.1805.2	1	18.2422	567.383	18.275
1	93.17	93.17	63.97	63.97	63.97	tr|C4YDJ3|C4YDJ3_CANAW; tr|A0A0A6Q741|A0A0A6Q741_CANAL; tr|A0A0A6M7H0|A0A0A6M7H0_CANAL; tr|A0A0A6M386|A0A0A6M386_CANAX; tr|A0A0A6LGT0|A0A0A6LGT0_CANAX; tr|A0A0A6L5Y0|A0A0A6L5Y0_CANAX; tr|A0A0A6L1C0|A0A0A6L1C0_CANAX; tr|A0A0A6KWM0|A0A0A6KWM0_CANAX; tr|A0A0A6K9D4|A0A0A6K9D4_CANAX; tr|A0A0A6K455|A0A0A6K455_CANAX; tr|A0A0A6JWU4|A0A0A6JWU4_CANAX; tr|A0A0A6J9A0|A0A0A6J9A0_CANAX; tr|A0A0A6J199|A0A0A6J19…	Elongation factor 1-alpha OS=Candida albicans (strain WO-1) GN=CAWG_00588 PE=3 SV=1; Elongation factor 1-alpha OS=Candida albicans (strain SC5314 / ATCC MYA-2876) GN=I503_00814 PE=3 SV=1; Elongation factor 1-alpha OS=Candida albicans (strain SC5314 / ATCC MYA-2876) GN=W5Q_02251 PE=3 SV=1; Elongation factor 1-alpha OS=Candida albicans P78042 GN=MGS_00808 PE=3 SV=1; Elongation factor 1-alpha OS=Can…			0	96.19	DMRQTVAVGVIKSVEKSDKAGKVTK	Oxidation(M)@2	missed R-Q@3; missed K-S@12; missed K-S@16; missed K-A@19; missed K-V@22	-0.00972052	2689.47	449.252	2689.48	449.254	6	10	1.1.1.1763.5	1	16.5591	2313.7	16.4265
1	93.17	93.17	63.97	63.97	63.97	tr|C4YDJ3|C4YDJ3_CANAW; tr|A0A0A6Q741|A0A0A6Q741_CANAL; tr|A0A0A6M7H0|A0A0A6M7H0_CANAL; tr|A0A0A6M386|A0A0A6M386_CANAX; tr|A0A0A6LGT0|A0A0A6LGT0_CANAX; tr|A0A0A6L5Y0|A0A0A6L5Y0_CANAX; tr|A0A0A6L1C0|A0A0A6L1C0_CANAX; tr|A0A0A6KWM0|A0A0A6KWM0_CANAX; tr|A0A0A6K9D4|A0A0A6K9D4_CANAX; tr|A0A0A6K455|A0A0A6K455_CANAX; tr|A0A0A6JWU4|A0A0A6JWU4_CANAX; tr|A0A0A6J9A0|A0A0A6J9A0_CANAX; tr|A0A0A6J199|A0A0A6J19…	Elongation factor 1-alpha OS=Candida albicans (strain WO-1) GN=CAWG_00588 PE=3 SV=1; Elongation factor 1-alpha OS=Candida albicans (strain SC5314 / ATCC MYA-2876) GN=I503_00814 PE=3 SV=1; Elongation factor 1-alpha OS=Candida albicans (strain SC5314 / ATCC MYA-2876) GN=W5Q_02251 PE=3 SV=1; Elongation factor 1-alpha OS=Candida albicans P78042 GN=MGS_00808 PE=3 SV=1; Elongation factor 1-alpha OS=Can…			0	99	DMRQTVAVGVIKSVEKSDKAGKVTKAAQK	Oxidation(M)@2	missed R-Q@3; missed K-S@12; missed K-S@16; missed K-A@19; missed K-V@22; missed K-A@25	-0.00172396	3087.71	618.548	3087.71	618.549	5	24	1.1.1.1731.16	1	15.2906	2819.7	15.3402
1	93.17	93.17	63.97	63.97	63.97	tr|C4YDJ3|C4YDJ3_CANAW; tr|A0A0A6Q741|A0A0A6Q741_CANAL; tr|A0A0A6M7H0|A0A0A6M7H0_CANAL; tr|A0A0A6M386|A0A0A6M386_CANAX; tr|A0A0A6LGT0|A0A0A6LGT0_CANAX; tr|A0A0A6L5Y0|A0A0A6L5Y0_CANAX; tr|A0A0A6L1C0|A0A0A6L1C0_CANAX; tr|A0A0A6KWM0|A0A0A6KWM0_CANAX; tr|A0A0A6K9D4|A0A0A6K9D4_CANAX; tr|A0A0A6K455|A0A0A6K455_CANAX; tr|A0A0A6JWU4|A0A0A6JWU4_CANAX; tr|A0A0A6J9A0|A0A0A6J9A0_CANAX; tr|A0A0A6J199|A0A0A6J19…	Elongation factor 1-alpha OS=Candida albicans (strain WO-1) GN=CAWG_00588 PE=3 SV=1; Elongation factor 1-alpha OS=Candida albicans (strain SC5314 / ATCC MYA-2876) GN=I503_00814 PE=3 SV=1; Elongation factor 1-alpha OS=Candida albicans (strain SC5314 / ATCC MYA-2876) GN=W5Q_02251 PE=3 SV=1; Elongation factor 1-alpha OS=Candida albicans P78042 GN=MGS_00808 PE=3 SV=1; Elongation factor 1-alpha OS=Can…			0	99	DMRQTVAVGVIKSVEKSDKAGKVTKAAQK	Oxidation(M)@2	missed R-Q@3; missed K-S@12; missed K-S@16; missed K-A@19; missed K-V@22; missed K-A@25	0.00467821	3087.71	772.935	3087.71	772.934	4	18	1.1.1.1732.19	1	15.3358	737.715	15.3402
1	93.17	93.17	63.97	63.97	63.97	tr|C4YDJ3|C4YDJ3_CANAW; tr|A0A0A6Q741|A0A0A6Q741_CANAL; tr|A0A0A6M7H0|A0A0A6M7H0_CANAL; tr|A0A0A6M386|A0A0A6M386_CANAX; tr|A0A0A6LGT0|A0A0A6LGT0_CANAX; tr|A0A0A6L5Y0|A0A0A6L5Y0_CANAX; tr|A0A0A6L1C0|A0A0A6L1C0_CANAX; tr|A0A0A6KWM0|A0A0A6KWM0_CANAX; tr|A0A0A6K9D4|A0A0A6K9D4_CANAX; tr|A0A0A6K455|A0A0A6K455_CANAX; tr|A0A0A6JWU4|A0A0A6JWU4_CANAX; tr|A0A0A6J9A0|A0A0A6J9A0_CANAX; tr|A0A0A6J199|A0A0A6J19…	Elongation factor 1-alpha OS=Candida albicans (strain WO-1) GN=CAWG_00588 PE=3 SV=1; Elongation factor 1-alpha OS=Candida albicans (strain SC5314 / ATCC MYA-2876) GN=I503_00814 PE=3 SV=1; Elongation factor 1-alpha OS=Candida albicans (strain SC5314 / ATCC MYA-2876) GN=W5Q_02251 PE=3 SV=1; Elongation factor 1-alpha OS=Candida albicans P78042 GN=MGS_00808 PE=3 SV=1; Elongation factor 1-alpha OS=Can…			0	99	DMRQTVAVGVIKSVEKSDKAGKVTKAAQK	Oxidation(M)@2	missed R-Q@3; missed K-S@12; missed K-S@16; missed K-A@19; missed K-V@22; missed K-A@25	-0.00539103	3087.7	515.624	3087.71	515.625	6	18	1.1.1.1733.13	1	15.3659	1990.18	15.3402
1	93.17	93.17	63.97	63.97	63.97	tr|C4YDJ3|C4YDJ3_CANAW; tr|A0A0A6Q741|A0A0A6Q741_CANAL; tr|A0A0A6M7H0|A0A0A6M7H0_CANAL; tr|A0A0A6M386|A0A0A6M386_CANAX; tr|A0A0A6LGT0|A0A0A6LGT0_CANAX; tr|A0A0A6L5Y0|A0A0A6L5Y0_CANAX; tr|A0A0A6L1C0|A0A0A6L1C0_CANAX; tr|A0A0A6KWM0|A0A0A6KWM0_CANAX; tr|A0A0A6K9D4|A0A0A6K9D4_CANAX; tr|A0A0A6K455|A0A0A6K455_CANAX; tr|A0A0A6JWU4|A0A0A6JWU4_CANAX; tr|A0A0A6J9A0|A0A0A6J9A0_CANAX; tr|A0A0A6J199|A0A0A6J19…	Elongation factor 1-alpha OS=Candida albicans (strain WO-1) GN=CAWG_00588 PE=3 SV=1; Elongation factor 1-alpha OS=Candida albicans (strain SC5314 / ATCC MYA-2876) GN=I503_00814 PE=3 SV=1; Elongation factor 1-alpha OS=Candida albicans (strain SC5314 / ATCC MYA-2876) GN=W5Q_02251 PE=3 SV=1; Elongation factor 1-alpha OS=Candida albicans P78042 GN=MGS_00808 PE=3 SV=1; Elongation factor 1-alpha OS=Can…			0	99	DMRQTVAVGVIKSVEKSDKAGKVTKAAQK	Oxidation(M)@2	missed R-Q@3; missed K-S@12; missed K-S@16; missed K-A@19; missed K-V@22; missed K-A@25	0.00467821	3087.71	772.935	3087.71	772.934	4	14	1.1.1.1733.19	1	15.3759	737.715	15.3402
1	93.17	93.17	63.97	63.97	63.97	tr|C4YDJ3|C4YDJ3_CANAW; tr|A0A0A6Q741|A0A0A6Q741_CANAL; tr|A0A0A6M7H0|A0A0A6M7H0_CANAL; tr|A0A0A6M386|A0A0A6M386_CANAX; tr|A0A0A6LGT0|A0A0A6LGT0_CANAX; tr|A0A0A6L5Y0|A0A0A6L5Y0_CANAX; tr|A0A0A6L1C0|A0A0A6L1C0_CANAX; tr|A0A0A6KWM0|A0A0A6KWM0_CANAX; tr|A0A0A6K9D4|A0A0A6K9D4_CANAX; tr|A0A0A6K455|A0A0A6K455_CANAX; tr|A0A0A6JWU4|A0A0A6JWU4_CANAX; tr|A0A0A6J9A0|A0A0A6J9A0_CANAX; tr|A0A0A6J199|A0A0A6J19…	Elongation factor 1-alpha OS=Candida albicans (strain WO-1) GN=CAWG_00588 PE=3 SV=1; Elongation factor 1-alpha OS=Candida albicans (strain SC5314 / ATCC MYA-2876) GN=I503_00814 PE=3 SV=1; Elongation factor 1-alpha OS=Candida albicans (strain SC5314 / ATCC MYA-2876) GN=W5Q_02251 PE=3 SV=1; Elongation factor 1-alpha OS=Candida albicans P78042 GN=MGS_00808 PE=3 SV=1; Elongation factor 1-alpha OS=Can…			0	99	DMRQTVAVGVIKSVEKSDKAGKVTKAAQK	Oxidation(M)@2	missed R-Q@3; missed K-S@12; missed K-S@16; missed K-A@19; missed K-V@22; missed K-A@25	-0.00172396	3087.71	618.548	3087.71	618.549	5	23	1.1.1.1734.12	1	15.4045	2819.7	15.3402
1	93.17	93.17	63.97	63.97	63.97	tr|C4YDJ3|C4YDJ3_CANAW; tr|A0A0A6Q741|A0A0A6Q741_CANAL; tr|A0A0A6M7H0|A0A0A6M7H0_CANAL; tr|A0A0A6M386|A0A0A6M386_CANAX; tr|A0A0A6LGT0|A0A0A6LGT0_CANAX; tr|A0A0A6L5Y0|A0A0A6L5Y0_CANAX; tr|A0A0A6L1C0|A0A0A6L1C0_CANAX; tr|A0A0A6KWM0|A0A0A6KWM0_CANAX; tr|A0A0A6K9D4|A0A0A6K9D4_CANAX; tr|A0A0A6K455|A0A0A6K455_CANAX; tr|A0A0A6JWU4|A0A0A6JWU4_CANAX; tr|A0A0A6J9A0|A0A0A6J9A0_CANAX; tr|A0A0A6J199|A0A0A6J19…	Elongation factor 1-alpha OS=Candida albicans (strain WO-1) GN=CAWG_00588 PE=3 SV=1; Elongation factor 1-alpha OS=Candida albicans (strain SC5314 / ATCC MYA-2876) GN=I503_00814 PE=3 SV=1; Elongation factor 1-alpha OS=Candida albicans (strain SC5314 / ATCC MYA-2876) GN=W5Q_02251 PE=3 SV=1; Elongation factor 1-alpha OS=Candida albicans P78042 GN=MGS_00808 PE=3 SV=1; Elongation factor 1-alpha OS=Can…			0	99	DMRQTVAVGVIKSVEKSDKAGKVTKAAQK	Oxidation(M)@2	missed R-Q@3; missed K-S@12; missed K-S@16; missed K-A@19; missed K-V@22; missed K-A@25	0.00467821	3087.71	772.935	3087.71	772.934	4	17	1.1.1.1735.19	1	15.4564	737.715	15.3402
1	93.17	93.17	63.97	63.97	63.97	tr|C4YDJ3|C4YDJ3_CANAW; tr|A0A0A6Q741|A0A0A6Q741_CANAL; tr|A0A0A6M7H0|A0A0A6M7H0_CANAL; tr|A0A0A6M386|A0A0A6M386_CANAX; tr|A0A0A6LGT0|A0A0A6LGT0_CANAX; tr|A0A0A6L5Y0|A0A0A6L5Y0_CANAX; tr|A0A0A6L1C0|A0A0A6L1C0_CANAX; tr|A0A0A6KWM0|A0A0A6KWM0_CANAX; tr|A0A0A6K9D4|A0A0A6K9D4_CANAX; tr|A0A0A6K455|A0A0A6K455_CANAX; tr|A0A0A6JWU4|A0A0A6JWU4_CANAX; tr|A0A0A6J9A0|A0A0A6J9A0_CANAX; tr|A0A0A6J199|A0A0A6J19…	Elongation factor 1-alpha OS=Candida albicans (strain WO-1) GN=CAWG_00588 PE=3 SV=1; Elongation factor 1-alpha OS=Candida albicans (strain SC5314 / ATCC MYA-2876) GN=I503_00814 PE=3 SV=1; Elongation factor 1-alpha OS=Candida albicans (strain SC5314 / ATCC MYA-2876) GN=W5Q_02251 PE=3 SV=1; Elongation factor 1-alpha OS=Candida albicans P78042 GN=MGS_00808 PE=3 SV=1; Elongation factor 1-alpha OS=Can…			0	99	DMRQTVAVGVIKSVEKSDKAGKVTKAAQK	Oxidation(M)@2	missed R-Q@3; missed K-S@12; missed K-S@16; missed K-A@19; missed K-V@22; missed K-A@25	-0.00539103	3087.7	515.624	3087.71	515.625	6	14	1.1.1.1736.10	1	15.4814	1990.18	15.3402
1	93.17	93.17	63.97	63.97	63.97	tr|C4YDJ3|C4YDJ3_CANAW; tr|A0A0A6Q741|A0A0A6Q741_CANAL; tr|A0A0A6M7H0|A0A0A6M7H0_CANAL; tr|A0A0A6M386|A0A0A6M386_CANAX; tr|A0A0A6LGT0|A0A0A6LGT0_CANAX; tr|A0A0A6L5Y0|A0A0A6L5Y0_CANAX; tr|A0A0A6L1C0|A0A0A6L1C0_CANAX; tr|A0A0A6KWM0|A0A0A6KWM0_CANAX; tr|A0A0A6K9D4|A0A0A6K9D4_CANAX; tr|A0A0A6K455|A0A0A6K455_CANAX; tr|A0A0A6JWU4|A0A0A6JWU4_CANAX; tr|A0A0A6J9A0|A0A0A6J9A0_CANAX; tr|A0A0A6J199|A0A0A6J19…	Elongation factor 1-alpha OS=Candida albicans (strain WO-1) GN=CAWG_00588 PE=3 SV=1; Elongation factor 1-alpha OS=Candida albicans (strain SC5314 / ATCC MYA-2876) GN=I503_00814 PE=3 SV=1; Elongation factor 1-alpha OS=Candida albicans (strain SC5314 / ATCC MYA-2876) GN=W5Q_02251 PE=3 SV=1; Elongation factor 1-alpha OS=Candida albicans P78042 GN=MGS_00808 PE=3 SV=1; Elongation factor 1-alpha OS=Can…			0	99	DMRQTVAVGVIKSVEKSDKAGKVTKAAQK	Oxidation(M)@2	missed R-Q@3; missed K-S@12; missed K-S@16; missed K-A@19; missed K-V@22; missed K-A@25	-0.00172396	3087.71	618.548	3087.71	618.549	5	14	1.1.1.1737.14	1	15.5282	2819.7	15.3402
1	93.17	93.17	63.97	63.97	63.97	tr|C4YDJ3|C4YDJ3_CANAW; tr|A0A0A6Q741|A0A0A6Q741_CANAL; tr|A0A0A6M7H0|A0A0A6M7H0_CANAL; tr|A0A0A6M386|A0A0A6M386_CANAX; tr|A0A0A6LGT0|A0A0A6LGT0_CANAX; tr|A0A0A6L5Y0|A0A0A6L5Y0_CANAX; tr|A0A0A6L1C0|A0A0A6L1C0_CANAX; tr|A0A0A6KWM0|A0A0A6KWM0_CANAX; tr|A0A0A6K9D4|A0A0A6K9D4_CANAX; tr|A0A0A6K455|A0A0A6K455_CANAX; tr|A0A0A6JWU4|A0A0A6JWU4_CANAX; tr|A0A0A6J9A0|A0A0A6J9A0_CANAX; tr|A0A0A6J199|A0A0A6J19…	Elongation factor 1-alpha OS=Candida albicans (strain WO-1) GN=CAWG_00588 PE=3 SV=1; Elongation factor 1-alpha OS=Candida albicans (strain SC5314 / ATCC MYA-2876) GN=I503_00814 PE=3 SV=1; Elongation factor 1-alpha OS=Candida albicans (strain SC5314 / ATCC MYA-2876) GN=W5Q_02251 PE=3 SV=1; Elongation factor 1-alpha OS=Candida albicans P78042 GN=MGS_00808 PE=3 SV=1; Elongation factor 1-alpha OS=Can…			0	20.47	DMRQTVAVGVIKSVEKSDKAGKVTKAAQK	Oxidation(M)@2	missed R-Q@3; missed K-S@12; missed K-S@16; missed K-A@19; missed K-V@22; missed K-A@25	0.00467821	3087.71	772.935	3087.71	772.934	4	8	1.1.1.1736.19	1	15.4964	737.715	15.3402
1	93.17	93.17	63.97	63.97	63.97	tr|C4YDJ3|C4YDJ3_CANAW; tr|A0A0A6Q741|A0A0A6Q741_CANAL; tr|A0A0A6M7H0|A0A0A6M7H0_CANAL; tr|A0A0A6M386|A0A0A6M386_CANAX; tr|A0A0A6LGT0|A0A0A6LGT0_CANAX; tr|A0A0A6L5Y0|A0A0A6L5Y0_CANAX; tr|A0A0A6L1C0|A0A0A6L1C0_CANAX; tr|A0A0A6KWM0|A0A0A6KWM0_CANAX; tr|A0A0A6K9D4|A0A0A6K9D4_CANAX; tr|A0A0A6K455|A0A0A6K455_CANAX; tr|A0A0A6JWU4|A0A0A6JWU4_CANAX; tr|A0A0A6J9A0|A0A0A6J9A0_CANAX; tr|A0A0A6J199|A0A0A6J19…	Elongation factor 1-alpha OS=Candida albicans (strain WO-1) GN=CAWG_00588 PE=3 SV=1; Elongation factor 1-alpha OS=Candida albicans (strain SC5314 / ATCC MYA-2876) GN=I503_00814 PE=3 SV=1; Elongation factor 1-alpha OS=Candida albicans (strain SC5314 / ATCC MYA-2876) GN=W5Q_02251 PE=3 SV=1; Elongation factor 1-alpha OS=Candida albicans P78042 GN=MGS_00808 PE=3 SV=1; Elongation factor 1-alpha OS=Can…			0	99	DMRQTVAVGVIKSVEKSDKAGKVTKAAQKAAKK	Oxidation(M)@2; Trimethyl(K)@33	missed R-Q@3; missed K-S@12; missed K-S@16; missed K-A@19; missed K-V@22; missed K-A@25; missed K-A@29; missed K-K@32	-0.0150165	3528	505.008	3528.02	505.01	7	15	1.1.1.1744.8	1	15.8004	931.965	15.7828
1	93.17	93.17	63.97	63.97	63.97	tr|C4YDJ3|C4YDJ3_CANAW; tr|A0A0A6Q741|A0A0A6Q741_CANAL; tr|A0A0A6M7H0|A0A0A6M7H0_CANAL; tr|A0A0A6M386|A0A0A6M386_CANAX; tr|A0A0A6LGT0|A0A0A6LGT0_CANAX; tr|A0A0A6L5Y0|A0A0A6L5Y0_CANAX; tr|A0A0A6L1C0|A0A0A6L1C0_CANAX; tr|A0A0A6KWM0|A0A0A6KWM0_CANAX; tr|A0A0A6K9D4|A0A0A6K9D4_CANAX; tr|A0A0A6K455|A0A0A6K455_CANAX; tr|A0A0A6JWU4|A0A0A6JWU4_CANAX; tr|A0A0A6J9A0|A0A0A6J9A0_CANAX; tr|A0A0A6J199|A0A0A6J19…	Elongation factor 1-alpha OS=Candida albicans (strain WO-1) GN=CAWG_00588 PE=3 SV=1; Elongation factor 1-alpha OS=Candida albicans (strain SC5314 / ATCC MYA-2876) GN=I503_00814 PE=3 SV=1; Elongation factor 1-alpha OS=Candida albicans (strain SC5314 / ATCC MYA-2876) GN=W5Q_02251 PE=3 SV=1; Elongation factor 1-alpha OS=Candida albicans P78042 GN=MGS_00808 PE=3 SV=1; Elongation factor 1-alpha OS=Can…			0	99	DMRQTVAVGVIKSVEKSDKAGKVTKAAQKAAKK	Oxidation(M)@2; Trimethyl(K)@33	missed R-Q@3; missed K-S@12; missed K-S@16; missed K-A@19; missed K-V@22; missed K-A@25; missed K-A@29; missed K-K@32	-0.0112923	3528.01	589.009	3528.02	589.01	6	14	1.1.1.1749.12	1	16.0079	836.59	15.823
1	93.17	93.17	63.97	63.97	63.97	tr|C4YDJ3|C4YDJ3_CANAW; tr|A0A0A6Q741|A0A0A6Q741_CANAL; tr|A0A0A6M7H0|A0A0A6M7H0_CANAL; tr|A0A0A6M386|A0A0A6M386_CANAX; tr|A0A0A6LGT0|A0A0A6LGT0_CANAX; tr|A0A0A6L5Y0|A0A0A6L5Y0_CANAX; tr|A0A0A6L1C0|A0A0A6L1C0_CANAX; tr|A0A0A6KWM0|A0A0A6KWM0_CANAX; tr|A0A0A6K9D4|A0A0A6K9D4_CANAX; tr|A0A0A6K455|A0A0A6K455_CANAX; tr|A0A0A6JWU4|A0A0A6JWU4_CANAX; tr|A0A0A6J9A0|A0A0A6J9A0_CANAX; tr|A0A0A6J199|A0A0A6J19…	Elongation factor 1-alpha OS=Candida albicans (strain WO-1) GN=CAWG_00588 PE=3 SV=1; Elongation factor 1-alpha OS=Candida albicans (strain SC5314 / ATCC MYA-2876) GN=I503_00814 PE=3 SV=1; Elongation factor 1-alpha OS=Candida albicans (strain SC5314 / ATCC MYA-2876) GN=W5Q_02251 PE=3 SV=1; Elongation factor 1-alpha OS=Candida albicans P78042 GN=MGS_00808 PE=3 SV=1; Elongation factor 1-alpha OS=Can…			0	95.84	DMRQTVAVGVIKSVEKSDKAGKVTKAAQKAAKK	Oxidation(M)@2; Trimethyl(K)@33	missed R-Q@3; missed K-S@12; missed K-S@16; missed K-A@19; missed K-V@22; missed K-A@25; missed K-A@29; missed K-K@32	-0.0150165	3528	505.008	3528.02	505.01	7	12	1.1.1.1747.8	1	15.921	931.965	15.7828
1	93.17	93.17	63.97	63.97	63.97	tr|C4YDJ3|C4YDJ3_CANAW; tr|A0A0A6Q741|A0A0A6Q741_CANAL; tr|A0A0A6M7H0|A0A0A6M7H0_CANAL; tr|A0A0A6M386|A0A0A6M386_CANAX; tr|A0A0A6LGT0|A0A0A6LGT0_CANAX; tr|A0A0A6L5Y0|A0A0A6L5Y0_CANAX; tr|A0A0A6L1C0|A0A0A6L1C0_CANAX; tr|A0A0A6KWM0|A0A0A6KWM0_CANAX; tr|A0A0A6K9D4|A0A0A6K9D4_CANAX; tr|A0A0A6K455|A0A0A6K455_CANAX; tr|A0A0A6JWU4|A0A0A6JWU4_CANAX; tr|A0A0A6J9A0|A0A0A6J9A0_CANAX; tr|A0A0A6J199|A0A0A6J19…	Elongation factor 1-alpha OS=Candida albicans (strain WO-1) GN=CAWG_00588 PE=3 SV=1; Elongation factor 1-alpha OS=Candida albicans (strain SC5314 / ATCC MYA-2876) GN=I503_00814 PE=3 SV=1; Elongation factor 1-alpha OS=Candida albicans (strain SC5314 / ATCC MYA-2876) GN=W5Q_02251 PE=3 SV=1; Elongation factor 1-alpha OS=Candida albicans P78042 GN=MGS_00808 PE=3 SV=1; Elongation factor 1-alpha OS=Can…			0	99	EHALLAYTLGVK			-0.000147221	1313.73	657.874	1313.73	657.874	2	15	1.1.1.1945.12	0	23.8311	3418.66	24.0078
1	93.17	93.17	63.97	63.97	63.97	tr|C4YDJ3|C4YDJ3_CANAW; tr|A0A0A6Q741|A0A0A6Q741_CANAL; tr|A0A0A6M7H0|A0A0A6M7H0_CANAL; tr|A0A0A6M386|A0A0A6M386_CANAX; tr|A0A0A6LGT0|A0A0A6LGT0_CANAX; tr|A0A0A6L5Y0|A0A0A6L5Y0_CANAX; tr|A0A0A6L1C0|A0A0A6L1C0_CANAX; tr|A0A0A6KWM0|A0A0A6KWM0_CANAX; tr|A0A0A6K9D4|A0A0A6K9D4_CANAX; tr|A0A0A6K455|A0A0A6K455_CANAX; tr|A0A0A6JWU4|A0A0A6JWU4_CANAX; tr|A0A0A6J9A0|A0A0A6J9A0_CANAX; tr|A0A0A6J199|A0A0A6J19…	Elongation factor 1-alpha OS=Candida albicans (strain WO-1) GN=CAWG_00588 PE=3 SV=1; Elongation factor 1-alpha OS=Candida albicans (strain SC5314 / ATCC MYA-2876) GN=I503_00814 PE=3 SV=1; Elongation factor 1-alpha OS=Candida albicans (strain SC5314 / ATCC MYA-2876) GN=W5Q_02251 PE=3 SV=1; Elongation factor 1-alpha OS=Candida albicans P78042 GN=MGS_00808 PE=3 SV=1; Elongation factor 1-alpha OS=Can…			0	99	EHALLAYTLGVK			-0.000147221	1313.73	657.874	1313.73	657.874	2	18	1.1.1.1948.15	1	23.9567	3418.66	24.0078
1	93.17	93.17	63.97	63.97	63.97	tr|C4YDJ3|C4YDJ3_CANAW; tr|A0A0A6Q741|A0A0A6Q741_CANAL; tr|A0A0A6M7H0|A0A0A6M7H0_CANAL; tr|A0A0A6M386|A0A0A6M386_CANAX; tr|A0A0A6LGT0|A0A0A6LGT0_CANAX; tr|A0A0A6L5Y0|A0A0A6L5Y0_CANAX; tr|A0A0A6L1C0|A0A0A6L1C0_CANAX; tr|A0A0A6KWM0|A0A0A6KWM0_CANAX; tr|A0A0A6K9D4|A0A0A6K9D4_CANAX; tr|A0A0A6K455|A0A0A6K455_CANAX; tr|A0A0A6JWU4|A0A0A6JWU4_CANAX; tr|A0A0A6J9A0|A0A0A6J9A0_CANAX; tr|A0A0A6J199|A0A0A6J19…	Elongation factor 1-alpha OS=Candida albicans (strain WO-1) GN=CAWG_00588 PE=3 SV=1; Elongation factor 1-alpha OS=Candida albicans (strain SC5314 / ATCC MYA-2876) GN=I503_00814 PE=3 SV=1; Elongation factor 1-alpha OS=Candida albicans (strain SC5314 / ATCC MYA-2876) GN=W5Q_02251 PE=3 SV=1; Elongation factor 1-alpha OS=Candida albicans P78042 GN=MGS_00808 PE=3 SV=1; Elongation factor 1-alpha OS=Can…			0	99	EHALLAYTLGVK			-0.000147221	1313.73	657.874	1313.73	657.874	2	11	1.1.1.1954.16	1	24.1986	3418.66	24.0078
1	93.17	93.17	63.97	63.97	63.97	tr|C4YDJ3|C4YDJ3_CANAW; tr|A0A0A6Q741|A0A0A6Q741_CANAL; tr|A0A0A6M7H0|A0A0A6M7H0_CANAL; tr|A0A0A6M386|A0A0A6M386_CANAX; tr|A0A0A6LGT0|A0A0A6LGT0_CANAX; tr|A0A0A6L5Y0|A0A0A6L5Y0_CANAX; tr|A0A0A6L1C0|A0A0A6L1C0_CANAX; tr|A0A0A6KWM0|A0A0A6KWM0_CANAX; tr|A0A0A6K9D4|A0A0A6K9D4_CANAX; tr|A0A0A6K455|A0A0A6K455_CANAX; tr|A0A0A6JWU4|A0A0A6JWU4_CANAX; tr|A0A0A6J9A0|A0A0A6J9A0_CANAX; tr|A0A0A6J199|A0A0A6J19…	Elongation factor 1-alpha OS=Candida albicans (strain WO-1) GN=CAWG_00588 PE=3 SV=1; Elongation factor 1-alpha OS=Candida albicans (strain SC5314 / ATCC MYA-2876) GN=I503_00814 PE=3 SV=1; Elongation factor 1-alpha OS=Candida albicans (strain SC5314 / ATCC MYA-2876) GN=W5Q_02251 PE=3 SV=1; Elongation factor 1-alpha OS=Candida albicans P78042 GN=MGS_00808 PE=3 SV=1; Elongation factor 1-alpha OS=Can…			0	99	EMHHEQLAEGVPGDNVGFNVK	Oxidation(M)@2	cleaved V-E@N-term	-0.00219803	2322.07	775.03	2322.07	775.031	3	18	1.1.1.1814.19	1	18.6327	1522.57	18.6371
1	93.17	93.17	63.97	63.97	63.97	tr|C4YDJ3|C4YDJ3_CANAW; tr|A0A0A6Q741|A0A0A6Q741_CANAL; tr|A0A0A6M7H0|A0A0A6M7H0_CANAL; tr|A0A0A6M386|A0A0A6M386_CANAX; tr|A0A0A6LGT0|A0A0A6LGT0_CANAX; tr|A0A0A6L5Y0|A0A0A6L5Y0_CANAX; tr|A0A0A6L1C0|A0A0A6L1C0_CANAX; tr|A0A0A6KWM0|A0A0A6KWM0_CANAX; tr|A0A0A6K9D4|A0A0A6K9D4_CANAX; tr|A0A0A6K455|A0A0A6K455_CANAX; tr|A0A0A6JWU4|A0A0A6JWU4_CANAX; tr|A0A0A6J9A0|A0A0A6J9A0_CANAX; tr|A0A0A6J199|A0A0A6J19…	Elongation factor 1-alpha OS=Candida albicans (strain WO-1) GN=CAWG_00588 PE=3 SV=1; Elongation factor 1-alpha OS=Candida albicans (strain SC5314 / ATCC MYA-2876) GN=I503_00814 PE=3 SV=1; Elongation factor 1-alpha OS=Candida albicans (strain SC5314 / ATCC MYA-2876) GN=W5Q_02251 PE=3 SV=1; Elongation factor 1-alpha OS=Candida albicans P78042 GN=MGS_00808 PE=3 SV=1; Elongation factor 1-alpha OS=Can…			0	99	EMHHEQLAEGVPGDNVGFNVK	Oxidation(M)@2	cleaved V-E@N-term	-0.00856867	2322.06	581.523	2322.07	581.525	4	16	1.1.1.1813.13	1	18.5826	2148.06	18.6371
1	93.17	93.17	63.97	63.97	63.97	tr|C4YDJ3|C4YDJ3_CANAW; tr|A0A0A6Q741|A0A0A6Q741_CANAL; tr|A0A0A6M7H0|A0A0A6M7H0_CANAL; tr|A0A0A6M386|A0A0A6M386_CANAX; tr|A0A0A6LGT0|A0A0A6LGT0_CANAX; tr|A0A0A6L5Y0|A0A0A6L5Y0_CANAX; tr|A0A0A6L1C0|A0A0A6L1C0_CANAX; tr|A0A0A6KWM0|A0A0A6KWM0_CANAX; tr|A0A0A6K9D4|A0A0A6K9D4_CANAX; tr|A0A0A6K455|A0A0A6K455_CANAX; tr|A0A0A6JWU4|A0A0A6JWU4_CANAX; tr|A0A0A6J9A0|A0A0A6J9A0_CANAX; tr|A0A0A6J199|A0A0A6J19…	Elongation factor 1-alpha OS=Candida albicans (strain WO-1) GN=CAWG_00588 PE=3 SV=1; Elongation factor 1-alpha OS=Candida albicans (strain SC5314 / ATCC MYA-2876) GN=I503_00814 PE=3 SV=1; Elongation factor 1-alpha OS=Candida albicans (strain SC5314 / ATCC MYA-2876) GN=W5Q_02251 PE=3 SV=1; Elongation factor 1-alpha OS=Candida albicans P78042 GN=MGS_00808 PE=3 SV=1; Elongation factor 1-alpha OS=Can…			0	99	EMHHEQLAEGVPGDNVGFNVK	Oxidation(M)@2	cleaved V-E@N-term	-0.00219803	2322.07	775.03	2322.07	775.031	3	16	1.1.1.1817.18	1	18.7505	1522.57	18.6371
1	93.17	93.17	63.97	63.97	63.97	tr|C4YDJ3|C4YDJ3_CANAW; tr|A0A0A6Q741|A0A0A6Q741_CANAL; tr|A0A0A6M7H0|A0A0A6M7H0_CANAL; tr|A0A0A6M386|A0A0A6M386_CANAX; tr|A0A0A6LGT0|A0A0A6LGT0_CANAX; tr|A0A0A6L5Y0|A0A0A6L5Y0_CANAX; tr|A0A0A6L1C0|A0A0A6L1C0_CANAX; tr|A0A0A6KWM0|A0A0A6KWM0_CANAX; tr|A0A0A6K9D4|A0A0A6K9D4_CANAX; tr|A0A0A6K455|A0A0A6K455_CANAX; tr|A0A0A6JWU4|A0A0A6JWU4_CANAX; tr|A0A0A6J9A0|A0A0A6J9A0_CANAX; tr|A0A0A6J199|A0A0A6J19…	Elongation factor 1-alpha OS=Candida albicans (strain WO-1) GN=CAWG_00588 PE=3 SV=1; Elongation factor 1-alpha OS=Candida albicans (strain SC5314 / ATCC MYA-2876) GN=I503_00814 PE=3 SV=1; Elongation factor 1-alpha OS=Candida albicans (strain SC5314 / ATCC MYA-2876) GN=W5Q_02251 PE=3 SV=1; Elongation factor 1-alpha OS=Candida albicans P78042 GN=MGS_00808 PE=3 SV=1; Elongation factor 1-alpha OS=Can…			0	99	EMHHEQLAEGVPGDNVGFNVK	Oxidation(M)@2	cleaved V-E@N-term	-0.00856867	2322.06	581.523	2322.07	581.525	4	14	1.1.1.1820.8	1	18.852	2148.06	18.6371
1	93.17	93.17	63.97	63.97	63.97	tr|C4YDJ3|C4YDJ3_CANAW; tr|A0A0A6Q741|A0A0A6Q741_CANAL; tr|A0A0A6M7H0|A0A0A6M7H0_CANAL; tr|A0A0A6M386|A0A0A6M386_CANAX; tr|A0A0A6LGT0|A0A0A6LGT0_CANAX; tr|A0A0A6L5Y0|A0A0A6L5Y0_CANAX; tr|A0A0A6L1C0|A0A0A6L1C0_CANAX; tr|A0A0A6KWM0|A0A0A6KWM0_CANAX; tr|A0A0A6K9D4|A0A0A6K9D4_CANAX; tr|A0A0A6K455|A0A0A6K455_CANAX; tr|A0A0A6JWU4|A0A0A6JWU4_CANAX; tr|A0A0A6J9A0|A0A0A6J9A0_CANAX; tr|A0A0A6J199|A0A0A6J19…	Elongation factor 1-alpha OS=Candida albicans (strain WO-1) GN=CAWG_00588 PE=3 SV=1; Elongation factor 1-alpha OS=Candida albicans (strain SC5314 / ATCC MYA-2876) GN=I503_00814 PE=3 SV=1; Elongation factor 1-alpha OS=Candida albicans (strain SC5314 / ATCC MYA-2876) GN=W5Q_02251 PE=3 SV=1; Elongation factor 1-alpha OS=Candida albicans P78042 GN=MGS_00808 PE=3 SV=1; Elongation factor 1-alpha OS=Can…			0	99	FAVRDMRQTVAVGVIK	Oxidation(M)@6	missed R-D@4; missed R-Q@7	0.000265894	1805	452.257	1805	452.257	4	17	1.1.1.1744.3	1	15.792	5830.68	15.8634
1	93.17	93.17	63.97	63.97	63.97	tr|C4YDJ3|C4YDJ3_CANAW; tr|A0A0A6Q741|A0A0A6Q741_CANAL; tr|A0A0A6M7H0|A0A0A6M7H0_CANAL; tr|A0A0A6M386|A0A0A6M386_CANAX; tr|A0A0A6LGT0|A0A0A6LGT0_CANAX; tr|A0A0A6L5Y0|A0A0A6L5Y0_CANAX; tr|A0A0A6L1C0|A0A0A6L1C0_CANAX; tr|A0A0A6KWM0|A0A0A6KWM0_CANAX; tr|A0A0A6K9D4|A0A0A6K9D4_CANAX; tr|A0A0A6K455|A0A0A6K455_CANAX; tr|A0A0A6JWU4|A0A0A6JWU4_CANAX; tr|A0A0A6J9A0|A0A0A6J9A0_CANAX; tr|A0A0A6J199|A0A0A6J19…	Elongation factor 1-alpha OS=Candida albicans (strain WO-1) GN=CAWG_00588 PE=3 SV=1; Elongation factor 1-alpha OS=Candida albicans (strain SC5314 / ATCC MYA-2876) GN=I503_00814 PE=3 SV=1; Elongation factor 1-alpha OS=Candida albicans (strain SC5314 / ATCC MYA-2876) GN=W5Q_02251 PE=3 SV=1; Elongation factor 1-alpha OS=Candida albicans P78042 GN=MGS_00808 PE=3 SV=1; Elongation factor 1-alpha OS=Can…			0	99	FAVRDMRQTVAVGVIK	Oxidation(M)@6	missed R-D@4; missed R-Q@7	0.000265894	1805	452.257	1805	452.257	4	15	1.1.1.1750.4	1	16.0347	5830.68	15.8634
1	93.17	93.17	63.97	63.97	63.97	tr|C4YDJ3|C4YDJ3_CANAW; tr|A0A0A6Q741|A0A0A6Q741_CANAL; tr|A0A0A6M7H0|A0A0A6M7H0_CANAL; tr|A0A0A6M386|A0A0A6M386_CANAX; tr|A0A0A6LGT0|A0A0A6LGT0_CANAX; tr|A0A0A6L5Y0|A0A0A6L5Y0_CANAX; tr|A0A0A6L1C0|A0A0A6L1C0_CANAX; tr|A0A0A6KWM0|A0A0A6KWM0_CANAX; tr|A0A0A6K9D4|A0A0A6K9D4_CANAX; tr|A0A0A6K455|A0A0A6K455_CANAX; tr|A0A0A6JWU4|A0A0A6JWU4_CANAX; tr|A0A0A6J9A0|A0A0A6J9A0_CANAX; tr|A0A0A6J199|A0A0A6J19…	Elongation factor 1-alpha OS=Candida albicans (strain WO-1) GN=CAWG_00588 PE=3 SV=1; Elongation factor 1-alpha OS=Candida albicans (strain SC5314 / ATCC MYA-2876) GN=I503_00814 PE=3 SV=1; Elongation factor 1-alpha OS=Candida albicans (strain SC5314 / ATCC MYA-2876) GN=W5Q_02251 PE=3 SV=1; Elongation factor 1-alpha OS=Candida albicans P78042 GN=MGS_00808 PE=3 SV=1; Elongation factor 1-alpha OS=Can…			0	99	FAVRDMRQTVAVGVIK	Oxidation(M)@6	missed R-D@4; missed R-Q@7	0.000265894	1805	452.257	1805	452.257	4	12	1.1.1.1754.5	1	16.1975	5830.68	15.8634
1	93.17	93.17	63.97	63.97	63.97	tr|C4YDJ3|C4YDJ3_CANAW; tr|A0A0A6Q741|A0A0A6Q741_CANAL; tr|A0A0A6M7H0|A0A0A6M7H0_CANAL; tr|A0A0A6M386|A0A0A6M386_CANAX; tr|A0A0A6LGT0|A0A0A6LGT0_CANAX; tr|A0A0A6L5Y0|A0A0A6L5Y0_CANAX; tr|A0A0A6L1C0|A0A0A6L1C0_CANAX; tr|A0A0A6KWM0|A0A0A6KWM0_CANAX; tr|A0A0A6K9D4|A0A0A6K9D4_CANAX; tr|A0A0A6K455|A0A0A6K455_CANAX; tr|A0A0A6JWU4|A0A0A6JWU4_CANAX; tr|A0A0A6J9A0|A0A0A6J9A0_CANAX; tr|A0A0A6J199|A0A0A6J19…	Elongation factor 1-alpha OS=Candida albicans (strain WO-1) GN=CAWG_00588 PE=3 SV=1; Elongation factor 1-alpha OS=Candida albicans (strain SC5314 / ATCC MYA-2876) GN=I503_00814 PE=3 SV=1; Elongation factor 1-alpha OS=Candida albicans (strain SC5314 / ATCC MYA-2876) GN=W5Q_02251 PE=3 SV=1; Elongation factor 1-alpha OS=Candida albicans P78042 GN=MGS_00808 PE=3 SV=1; Elongation factor 1-alpha OS=Can…			0	99	FAVRDMRQTVAVGVIK	Oxidation(M)@6	missed R-D@4; missed R-Q@7	0.000265894	1805	452.257	1805	452.257	4	11	1.1.1.1741.4	1	15.6726	5830.68	15.8634
1	93.17	93.17	63.97	63.97	63.97	tr|C4YDJ3|C4YDJ3_CANAW; tr|A0A0A6Q741|A0A0A6Q741_CANAL; tr|A0A0A6M7H0|A0A0A6M7H0_CANAL; tr|A0A0A6M386|A0A0A6M386_CANAX; tr|A0A0A6LGT0|A0A0A6LGT0_CANAX; tr|A0A0A6L5Y0|A0A0A6L5Y0_CANAX; tr|A0A0A6L1C0|A0A0A6L1C0_CANAX; tr|A0A0A6KWM0|A0A0A6KWM0_CANAX; tr|A0A0A6K9D4|A0A0A6K9D4_CANAX; tr|A0A0A6K455|A0A0A6K455_CANAX; tr|A0A0A6JWU4|A0A0A6JWU4_CANAX; tr|A0A0A6J9A0|A0A0A6J9A0_CANAX; tr|A0A0A6J199|A0A0A6J19…	Elongation factor 1-alpha OS=Candida albicans (strain WO-1) GN=CAWG_00588 PE=3 SV=1; Elongation factor 1-alpha OS=Candida albicans (strain SC5314 / ATCC MYA-2876) GN=I503_00814 PE=3 SV=1; Elongation factor 1-alpha OS=Candida albicans (strain SC5314 / ATCC MYA-2876) GN=W5Q_02251 PE=3 SV=1; Elongation factor 1-alpha OS=Candida albicans P78042 GN=MGS_00808 PE=3 SV=1; Elongation factor 1-alpha OS=Can…			0	99	FAVRDMRQTVAVGVIK	Oxidation(M)@6; Deamidated(Q)@8	missed R-D@4; missed R-Q@7	-0.00257402	1805.98	452.502	1805.98	452.503	4	13	1.1.1.1774.4	1	16.999	1466.17	16.948
1	93.17	93.17	63.97	63.97	63.97	tr|C4YDJ3|C4YDJ3_CANAW; tr|A0A0A6Q741|A0A0A6Q741_CANAL; tr|A0A0A6M7H0|A0A0A6M7H0_CANAL; tr|A0A0A6M386|A0A0A6M386_CANAX; tr|A0A0A6LGT0|A0A0A6LGT0_CANAX; tr|A0A0A6L5Y0|A0A0A6L5Y0_CANAX; tr|A0A0A6L1C0|A0A0A6L1C0_CANAX; tr|A0A0A6KWM0|A0A0A6KWM0_CANAX; tr|A0A0A6K9D4|A0A0A6K9D4_CANAX; tr|A0A0A6K455|A0A0A6K455_CANAX; tr|A0A0A6JWU4|A0A0A6JWU4_CANAX; tr|A0A0A6J9A0|A0A0A6J9A0_CANAX; tr|A0A0A6J199|A0A0A6J19…	Elongation factor 1-alpha OS=Candida albicans (strain WO-1) GN=CAWG_00588 PE=3 SV=1; Elongation factor 1-alpha OS=Candida albicans (strain SC5314 / ATCC MYA-2876) GN=I503_00814 PE=3 SV=1; Elongation factor 1-alpha OS=Candida albicans (strain SC5314 / ATCC MYA-2876) GN=W5Q_02251 PE=3 SV=1; Elongation factor 1-alpha OS=Candida albicans P78042 GN=MGS_00808 PE=3 SV=1; Elongation factor 1-alpha OS=Can…			0	84.84	FAVRDMRQTVAVGVIK	Oxidation(M)@6	missed R-D@4; missed R-Q@7	0.000132654	1805	602.673	1805	602.673	3	9	1.1.1.1741.16	1	15.6926	4085.78	15.823
1	93.17	93.17	63.97	63.97	63.97	tr|C4YDJ3|C4YDJ3_CANAW; tr|A0A0A6Q741|A0A0A6Q741_CANAL; tr|A0A0A6M7H0|A0A0A6M7H0_CANAL; tr|A0A0A6M386|A0A0A6M386_CANAX; tr|A0A0A6LGT0|A0A0A6LGT0_CANAX; tr|A0A0A6L5Y0|A0A0A6L5Y0_CANAX; tr|A0A0A6L1C0|A0A0A6L1C0_CANAX; tr|A0A0A6KWM0|A0A0A6KWM0_CANAX; tr|A0A0A6K9D4|A0A0A6K9D4_CANAX; tr|A0A0A6K455|A0A0A6K455_CANAX; tr|A0A0A6JWU4|A0A0A6JWU4_CANAX; tr|A0A0A6J9A0|A0A0A6J9A0_CANAX; tr|A0A0A6J199|A0A0A6J19…	Elongation factor 1-alpha OS=Candida albicans (strain WO-1) GN=CAWG_00588 PE=3 SV=1; Elongation factor 1-alpha OS=Candida albicans (strain SC5314 / ATCC MYA-2876) GN=I503_00814 PE=3 SV=1; Elongation factor 1-alpha OS=Candida albicans (strain SC5314 / ATCC MYA-2876) GN=W5Q_02251 PE=3 SV=1; Elongation factor 1-alpha OS=Candida albicans P78042 GN=MGS_00808 PE=3 SV=1; Elongation factor 1-alpha OS=Can…			0	99	FAVRDMRQTVAVGVIKSVEK	Oxidation(M)@6	missed R-D@4; missed R-Q@7; missed K-S@16	-0.00725532	2248.23	563.064	2248.24	563.066	4	13	1.1.1.1807.13	1	18.3413	2668.2	18.4362
1	93.17	93.17	63.97	63.97	63.97	tr|C4YDJ3|C4YDJ3_CANAW; tr|A0A0A6Q741|A0A0A6Q741_CANAL; tr|A0A0A6M7H0|A0A0A6M7H0_CANAL; tr|A0A0A6M386|A0A0A6M386_CANAX; tr|A0A0A6LGT0|A0A0A6LGT0_CANAX; tr|A0A0A6L5Y0|A0A0A6L5Y0_CANAX; tr|A0A0A6L1C0|A0A0A6L1C0_CANAX; tr|A0A0A6KWM0|A0A0A6KWM0_CANAX; tr|A0A0A6K9D4|A0A0A6K9D4_CANAX; tr|A0A0A6K455|A0A0A6K455_CANAX; tr|A0A0A6JWU4|A0A0A6JWU4_CANAX; tr|A0A0A6J9A0|A0A0A6J9A0_CANAX; tr|A0A0A6J199|A0A0A6J19…	Elongation factor 1-alpha OS=Candida albicans (strain WO-1) GN=CAWG_00588 PE=3 SV=1; Elongation factor 1-alpha OS=Candida albicans (strain SC5314 / ATCC MYA-2876) GN=I503_00814 PE=3 SV=1; Elongation factor 1-alpha OS=Candida albicans (strain SC5314 / ATCC MYA-2876) GN=W5Q_02251 PE=3 SV=1; Elongation factor 1-alpha OS=Candida albicans P78042 GN=MGS_00808 PE=3 SV=1; Elongation factor 1-alpha OS=Can…			0	99	FAVRDMRQTVAVGVIKSVEKSDK	Oxidation(M)@6; Deamidated(Q)@8	missed R-D@4; missed R-Q@7; missed K-S@16; missed K-S@20	0.00894732	2579.38	516.884	2579.37	516.882	5	14	1.1.1.1805.5	1	18.2472	1097.26	18.3153
1	93.17	93.17	63.97	63.97	63.97	tr|C4YDJ3|C4YDJ3_CANAW; tr|A0A0A6Q741|A0A0A6Q741_CANAL; tr|A0A0A6M7H0|A0A0A6M7H0_CANAL; tr|A0A0A6M386|A0A0A6M386_CANAX; tr|A0A0A6LGT0|A0A0A6LGT0_CANAX; tr|A0A0A6L5Y0|A0A0A6L5Y0_CANAX; tr|A0A0A6L1C0|A0A0A6L1C0_CANAX; tr|A0A0A6KWM0|A0A0A6KWM0_CANAX; tr|A0A0A6K9D4|A0A0A6K9D4_CANAX; tr|A0A0A6K455|A0A0A6K455_CANAX; tr|A0A0A6JWU4|A0A0A6JWU4_CANAX; tr|A0A0A6J9A0|A0A0A6J9A0_CANAX; tr|A0A0A6J199|A0A0A6J19…	Elongation factor 1-alpha OS=Candida albicans (strain WO-1) GN=CAWG_00588 PE=3 SV=1; Elongation factor 1-alpha OS=Candida albicans (strain SC5314 / ATCC MYA-2876) GN=I503_00814 PE=3 SV=1; Elongation factor 1-alpha OS=Candida albicans (strain SC5314 / ATCC MYA-2876) GN=W5Q_02251 PE=3 SV=1; Elongation factor 1-alpha OS=Candida albicans P78042 GN=MGS_00808 PE=3 SV=1; Elongation factor 1-alpha OS=Can…			0	99	FAVRDMRQTVAVGVIKSVEKSDKAGK	Oxidation(M)@6	missed R-D@4; missed R-Q@7; missed K-S@16; missed K-S@20; missed K-A@23	-0.00598408	2834.54	473.43	2834.54	473.431	6	14	1.1.1.1781.6	1	17.284	1102.85	17.31
1	93.17	93.17	63.97	63.97	63.97	tr|C4YDJ3|C4YDJ3_CANAW; tr|A0A0A6Q741|A0A0A6Q741_CANAL; tr|A0A0A6M7H0|A0A0A6M7H0_CANAL; tr|A0A0A6M386|A0A0A6M386_CANAX; tr|A0A0A6LGT0|A0A0A6LGT0_CANAX; tr|A0A0A6L5Y0|A0A0A6L5Y0_CANAX; tr|A0A0A6L1C0|A0A0A6L1C0_CANAX; tr|A0A0A6KWM0|A0A0A6KWM0_CANAX; tr|A0A0A6K9D4|A0A0A6K9D4_CANAX; tr|A0A0A6K455|A0A0A6K455_CANAX; tr|A0A0A6JWU4|A0A0A6JWU4_CANAX; tr|A0A0A6J9A0|A0A0A6J9A0_CANAX; tr|A0A0A6J199|A0A0A6J19…	Elongation factor 1-alpha OS=Candida albicans (strain WO-1) GN=CAWG_00588 PE=3 SV=1; Elongation factor 1-alpha OS=Candida albicans (strain SC5314 / ATCC MYA-2876) GN=I503_00814 PE=3 SV=1; Elongation factor 1-alpha OS=Candida albicans (strain SC5314 / ATCC MYA-2876) GN=W5Q_02251 PE=3 SV=1; Elongation factor 1-alpha OS=Candida albicans P78042 GN=MGS_00808 PE=3 SV=1; Elongation factor 1-alpha OS=Can…			0	95.84	FAVRDMRQTVAVGVIKSVEKSDKAGK	Carbamidomethyl@N-term; Dehydrated(D)@5; Oxidation(M)@6; Phospho(T)@9	missed R-D@4; missed R-Q@7; missed K-S@16; missed K-S@20; missed K-A@23	0.0641721	2953.59	591.724	2953.52	591.711	5	13	1.1.1.1777.14	0	17.1362	2844.29	17.0284
1	93.17	93.17	63.97	63.97	63.97	tr|C4YDJ3|C4YDJ3_CANAW; tr|A0A0A6Q741|A0A0A6Q741_CANAL; tr|A0A0A6M7H0|A0A0A6M7H0_CANAL; tr|A0A0A6M386|A0A0A6M386_CANAX; tr|A0A0A6LGT0|A0A0A6LGT0_CANAX; tr|A0A0A6L5Y0|A0A0A6L5Y0_CANAX; tr|A0A0A6L1C0|A0A0A6L1C0_CANAX; tr|A0A0A6KWM0|A0A0A6KWM0_CANAX; tr|A0A0A6K9D4|A0A0A6K9D4_CANAX; tr|A0A0A6K455|A0A0A6K455_CANAX; tr|A0A0A6JWU4|A0A0A6JWU4_CANAX; tr|A0A0A6J9A0|A0A0A6J9A0_CANAX; tr|A0A0A6J199|A0A0A6J19…	Elongation factor 1-alpha OS=Candida albicans (strain WO-1) GN=CAWG_00588 PE=3 SV=1; Elongation factor 1-alpha OS=Candida albicans (strain SC5314 / ATCC MYA-2876) GN=I503_00814 PE=3 SV=1; Elongation factor 1-alpha OS=Candida albicans (strain SC5314 / ATCC MYA-2876) GN=W5Q_02251 PE=3 SV=1; Elongation factor 1-alpha OS=Candida albicans P78042 GN=MGS_00808 PE=3 SV=1; Elongation factor 1-alpha OS=Can…			0	99	FAVRDMRQTVAVGVIKSVEKSDKAGKVTK	Oxidation(M)@6	missed R-D@4; missed R-Q@7; missed K-S@16; missed K-S@20; missed K-A@23; missed K-V@26	-0.0105682	3162.74	633.556	3162.75	633.558	5	19	1.1.1.1767.13	1	16.7332	3997.86	16.8277
1	93.17	93.17	63.97	63.97	63.97	tr|C4YDJ3|C4YDJ3_CANAW; tr|A0A0A6Q741|A0A0A6Q741_CANAL; tr|A0A0A6M7H0|A0A0A6M7H0_CANAL; tr|A0A0A6M386|A0A0A6M386_CANAX; tr|A0A0A6LGT0|A0A0A6LGT0_CANAX; tr|A0A0A6L5Y0|A0A0A6L5Y0_CANAX; tr|A0A0A6L1C0|A0A0A6L1C0_CANAX; tr|A0A0A6KWM0|A0A0A6KWM0_CANAX; tr|A0A0A6K9D4|A0A0A6K9D4_CANAX; tr|A0A0A6K455|A0A0A6K455_CANAX; tr|A0A0A6JWU4|A0A0A6JWU4_CANAX; tr|A0A0A6J9A0|A0A0A6J9A0_CANAX; tr|A0A0A6J199|A0A0A6J19…	Elongation factor 1-alpha OS=Candida albicans (strain WO-1) GN=CAWG_00588 PE=3 SV=1; Elongation factor 1-alpha OS=Candida albicans (strain SC5314 / ATCC MYA-2876) GN=I503_00814 PE=3 SV=1; Elongation factor 1-alpha OS=Candida albicans (strain SC5314 / ATCC MYA-2876) GN=W5Q_02251 PE=3 SV=1; Elongation factor 1-alpha OS=Candida albicans P78042 GN=MGS_00808 PE=3 SV=1; Elongation factor 1-alpha OS=Can…			0	99	FAVRDMRQTVAVGVIKSVEKSDKAGKVTK	Oxidation(M)@6	missed R-D@4; missed R-Q@7; missed K-S@16; missed K-S@20; missed K-A@23; missed K-V@26	-0.0118715	3162.74	528.131	3162.75	528.133	6	27	1.1.1.1769.13	1	16.8133	6560.84	16.8678
1	93.17	93.17	63.97	63.97	63.97	tr|C4YDJ3|C4YDJ3_CANAW; tr|A0A0A6Q741|A0A0A6Q741_CANAL; tr|A0A0A6M7H0|A0A0A6M7H0_CANAL; tr|A0A0A6M386|A0A0A6M386_CANAX; tr|A0A0A6LGT0|A0A0A6LGT0_CANAX; tr|A0A0A6L5Y0|A0A0A6L5Y0_CANAX; tr|A0A0A6L1C0|A0A0A6L1C0_CANAX; tr|A0A0A6KWM0|A0A0A6KWM0_CANAX; tr|A0A0A6K9D4|A0A0A6K9D4_CANAX; tr|A0A0A6K455|A0A0A6K455_CANAX; tr|A0A0A6JWU4|A0A0A6JWU4_CANAX; tr|A0A0A6J9A0|A0A0A6J9A0_CANAX; tr|A0A0A6J199|A0A0A6J19…	Elongation factor 1-alpha OS=Candida albicans (strain WO-1) GN=CAWG_00588 PE=3 SV=1; Elongation factor 1-alpha OS=Candida albicans (strain SC5314 / ATCC MYA-2876) GN=I503_00814 PE=3 SV=1; Elongation factor 1-alpha OS=Candida albicans (strain SC5314 / ATCC MYA-2876) GN=W5Q_02251 PE=3 SV=1; Elongation factor 1-alpha OS=Candida albicans P78042 GN=MGS_00808 PE=3 SV=1; Elongation factor 1-alpha OS=Can…			0	99	FAVRDMRQTVAVGVIKSVEKSDKAGKVTK	Oxidation(M)@6	missed R-D@4; missed R-Q@7; missed K-S@16; missed K-S@20; missed K-A@23; missed K-V@26	-0.000437627	3162.75	791.696	3162.75	791.696	4	20	1.1.1.1769.19	1	16.8233	1492.99	16.8678
1	93.17	93.17	63.97	63.97	63.97	tr|C4YDJ3|C4YDJ3_CANAW; tr|A0A0A6Q741|A0A0A6Q741_CANAL; tr|A0A0A6M7H0|A0A0A6M7H0_CANAL; tr|A0A0A6M386|A0A0A6M386_CANAX; tr|A0A0A6LGT0|A0A0A6LGT0_CANAX; tr|A0A0A6L5Y0|A0A0A6L5Y0_CANAX; tr|A0A0A6L1C0|A0A0A6L1C0_CANAX; tr|A0A0A6KWM0|A0A0A6KWM0_CANAX; tr|A0A0A6K9D4|A0A0A6K9D4_CANAX; tr|A0A0A6K455|A0A0A6K455_CANAX; tr|A0A0A6JWU4|A0A0A6JWU4_CANAX; tr|A0A0A6J9A0|A0A0A6J9A0_CANAX; tr|A0A0A6J199|A0A0A6J19…	Elongation factor 1-alpha OS=Candida albicans (strain WO-1) GN=CAWG_00588 PE=3 SV=1; Elongation factor 1-alpha OS=Candida albicans (strain SC5314 / ATCC MYA-2876) GN=I503_00814 PE=3 SV=1; Elongation factor 1-alpha OS=Candida albicans (strain SC5314 / ATCC MYA-2876) GN=W5Q_02251 PE=3 SV=1; Elongation factor 1-alpha OS=Candida albicans P78042 GN=MGS_00808 PE=3 SV=1; Elongation factor 1-alpha OS=Can…			0	99	FAVRDMRQTVAVGVIKSVEKSDKAGKVTK	Oxidation(M)@6	missed R-D@4; missed R-Q@7; missed K-S@16; missed K-S@20; missed K-A@23; missed K-V@26	-0.0105682	3162.74	633.556	3162.75	633.558	5	19	1.1.1.1770.16	1	16.8584	3997.86	16.8277
1	93.17	93.17	63.97	63.97	63.97	tr|C4YDJ3|C4YDJ3_CANAW; tr|A0A0A6Q741|A0A0A6Q741_CANAL; tr|A0A0A6M7H0|A0A0A6M7H0_CANAL; tr|A0A0A6M386|A0A0A6M386_CANAX; tr|A0A0A6LGT0|A0A0A6LGT0_CANAX; tr|A0A0A6L5Y0|A0A0A6L5Y0_CANAX; tr|A0A0A6L1C0|A0A0A6L1C0_CANAX; tr|A0A0A6KWM0|A0A0A6KWM0_CANAX; tr|A0A0A6K9D4|A0A0A6K9D4_CANAX; tr|A0A0A6K455|A0A0A6K455_CANAX; tr|A0A0A6JWU4|A0A0A6JWU4_CANAX; tr|A0A0A6J9A0|A0A0A6J9A0_CANAX; tr|A0A0A6J199|A0A0A6J19…	Elongation factor 1-alpha OS=Candida albicans (strain WO-1) GN=CAWG_00588 PE=3 SV=1; Elongation factor 1-alpha OS=Candida albicans (strain SC5314 / ATCC MYA-2876) GN=I503_00814 PE=3 SV=1; Elongation factor 1-alpha OS=Candida albicans (strain SC5314 / ATCC MYA-2876) GN=W5Q_02251 PE=3 SV=1; Elongation factor 1-alpha OS=Candida albicans P78042 GN=MGS_00808 PE=3 SV=1; Elongation factor 1-alpha OS=Can…			0	99	FAVRDMRQTVAVGVIKSVEKSDKAGKVTK	Oxidation(M)@6	missed R-D@4; missed R-Q@7; missed K-S@16; missed K-S@20; missed K-A@23; missed K-V@26	-0.000437627	3162.75	791.696	3162.75	791.696	4	17	1.1.1.1771.19	1	16.9035	1492.99	16.8678
1	93.17	93.17	63.97	63.97	63.97	tr|C4YDJ3|C4YDJ3_CANAW; tr|A0A0A6Q741|A0A0A6Q741_CANAL; tr|A0A0A6M7H0|A0A0A6M7H0_CANAL; tr|A0A0A6M386|A0A0A6M386_CANAX; tr|A0A0A6LGT0|A0A0A6LGT0_CANAX; tr|A0A0A6L5Y0|A0A0A6L5Y0_CANAX; tr|A0A0A6L1C0|A0A0A6L1C0_CANAX; tr|A0A0A6KWM0|A0A0A6KWM0_CANAX; tr|A0A0A6K9D4|A0A0A6K9D4_CANAX; tr|A0A0A6K455|A0A0A6K455_CANAX; tr|A0A0A6JWU4|A0A0A6JWU4_CANAX; tr|A0A0A6J9A0|A0A0A6J9A0_CANAX; tr|A0A0A6J199|A0A0A6J19…	Elongation factor 1-alpha OS=Candida albicans (strain WO-1) GN=CAWG_00588 PE=3 SV=1; Elongation factor 1-alpha OS=Candida albicans (strain SC5314 / ATCC MYA-2876) GN=I503_00814 PE=3 SV=1; Elongation factor 1-alpha OS=Candida albicans (strain SC5314 / ATCC MYA-2876) GN=W5Q_02251 PE=3 SV=1; Elongation factor 1-alpha OS=Candida albicans P78042 GN=MGS_00808 PE=3 SV=1; Elongation factor 1-alpha OS=Can…			0	99	FAVRDMRQTVAVGVIKSVEKSDKAGKVTK	Oxidation(M)@6	missed R-D@4; missed R-Q@7; missed K-S@16; missed K-S@20; missed K-A@23; missed K-V@26	-0.0118715	3162.74	528.131	3162.75	528.133	6	24	1.1.1.1772.12	1	16.932	6560.84	16.8678
1	93.17	93.17	63.97	63.97	63.97	tr|C4YDJ3|C4YDJ3_CANAW; tr|A0A0A6Q741|A0A0A6Q741_CANAL; tr|A0A0A6M7H0|A0A0A6M7H0_CANAL; tr|A0A0A6M386|A0A0A6M386_CANAX; tr|A0A0A6LGT0|A0A0A6LGT0_CANAX; tr|A0A0A6L5Y0|A0A0A6L5Y0_CANAX; tr|A0A0A6L1C0|A0A0A6L1C0_CANAX; tr|A0A0A6KWM0|A0A0A6KWM0_CANAX; tr|A0A0A6K9D4|A0A0A6K9D4_CANAX; tr|A0A0A6K455|A0A0A6K455_CANAX; tr|A0A0A6JWU4|A0A0A6JWU4_CANAX; tr|A0A0A6J9A0|A0A0A6J9A0_CANAX; tr|A0A0A6J199|A0A0A6J19…	Elongation factor 1-alpha OS=Candida albicans (strain WO-1) GN=CAWG_00588 PE=3 SV=1; Elongation factor 1-alpha OS=Candida albicans (strain SC5314 / ATCC MYA-2876) GN=I503_00814 PE=3 SV=1; Elongation factor 1-alpha OS=Candida albicans (strain SC5314 / ATCC MYA-2876) GN=W5Q_02251 PE=3 SV=1; Elongation factor 1-alpha OS=Candida albicans P78042 GN=MGS_00808 PE=3 SV=1; Elongation factor 1-alpha OS=Can…			0	99	FAVRDMRQTVAVGVIKSVEKSDKAGKVTK	Oxidation(M)@6	missed R-D@4; missed R-Q@7; missed K-S@16; missed K-S@20; missed K-A@23; missed K-V@26	-0.0105682	3162.74	633.556	3162.75	633.558	5	18	1.1.1.1773.17	1	16.9804	3997.86	16.8277
1	93.17	93.17	63.97	63.97	63.97	tr|C4YDJ3|C4YDJ3_CANAW; tr|A0A0A6Q741|A0A0A6Q741_CANAL; tr|A0A0A6M7H0|A0A0A6M7H0_CANAL; tr|A0A0A6M386|A0A0A6M386_CANAX; tr|A0A0A6LGT0|A0A0A6LGT0_CANAX; tr|A0A0A6L5Y0|A0A0A6L5Y0_CANAX; tr|A0A0A6L1C0|A0A0A6L1C0_CANAX; tr|A0A0A6KWM0|A0A0A6KWM0_CANAX; tr|A0A0A6K9D4|A0A0A6K9D4_CANAX; tr|A0A0A6K455|A0A0A6K455_CANAX; tr|A0A0A6JWU4|A0A0A6JWU4_CANAX; tr|A0A0A6J9A0|A0A0A6J9A0_CANAX; tr|A0A0A6J199|A0A0A6J19…	Elongation factor 1-alpha OS=Candida albicans (strain WO-1) GN=CAWG_00588 PE=3 SV=1; Elongation factor 1-alpha OS=Candida albicans (strain SC5314 / ATCC MYA-2876) GN=I503_00814 PE=3 SV=1; Elongation factor 1-alpha OS=Candida albicans (strain SC5314 / ATCC MYA-2876) GN=W5Q_02251 PE=3 SV=1; Elongation factor 1-alpha OS=Candida albicans P78042 GN=MGS_00808 PE=3 SV=1; Elongation factor 1-alpha OS=Can…			0	99	FAVRDMRQTVAVGVIKSVEKSDKAGKVTK	Oxidation(M)@6	missed R-D@4; missed R-Q@7; missed K-S@16; missed K-S@20; missed K-A@23; missed K-V@26	-0.0118715	3162.74	528.131	3162.75	528.133	6	16	1.1.1.1775.11	1	17.0509	6560.84	16.8678
1	93.17	93.17	63.97	63.97	63.97	tr|C4YDJ3|C4YDJ3_CANAW; tr|A0A0A6Q741|A0A0A6Q741_CANAL; tr|A0A0A6M7H0|A0A0A6M7H0_CANAL; tr|A0A0A6M386|A0A0A6M386_CANAX; tr|A0A0A6LGT0|A0A0A6LGT0_CANAX; tr|A0A0A6L5Y0|A0A0A6L5Y0_CANAX; tr|A0A0A6L1C0|A0A0A6L1C0_CANAX; tr|A0A0A6KWM0|A0A0A6KWM0_CANAX; tr|A0A0A6K9D4|A0A0A6K9D4_CANAX; tr|A0A0A6K455|A0A0A6K455_CANAX; tr|A0A0A6JWU4|A0A0A6JWU4_CANAX; tr|A0A0A6J9A0|A0A0A6J9A0_CANAX; tr|A0A0A6J199|A0A0A6J19…	Elongation factor 1-alpha OS=Candida albicans (strain WO-1) GN=CAWG_00588 PE=3 SV=1; Elongation factor 1-alpha OS=Candida albicans (strain SC5314 / ATCC MYA-2876) GN=I503_00814 PE=3 SV=1; Elongation factor 1-alpha OS=Candida albicans (strain SC5314 / ATCC MYA-2876) GN=W5Q_02251 PE=3 SV=1; Elongation factor 1-alpha OS=Candida albicans P78042 GN=MGS_00808 PE=3 SV=1; Elongation factor 1-alpha OS=Can…			0	99	FAVRDMRQTVAVGVIKSVEKSDKAGKVTK	Oxidation(M)@6	missed R-D@4; missed R-Q@7; missed K-S@16; missed K-S@20; missed K-A@23; missed K-V@26	-0.00765999	3162.75	452.828	3162.75	452.829	7	12	1.1.1.1771.5	1	16.8802	3698.07	16.8277
1	93.17	93.17	63.97	63.97	63.97	tr|C4YDJ3|C4YDJ3_CANAW; tr|A0A0A6Q741|A0A0A6Q741_CANAL; tr|A0A0A6M7H0|A0A0A6M7H0_CANAL; tr|A0A0A6M386|A0A0A6M386_CANAX; tr|A0A0A6LGT0|A0A0A6LGT0_CANAX; tr|A0A0A6L5Y0|A0A0A6L5Y0_CANAX; tr|A0A0A6L1C0|A0A0A6L1C0_CANAX; tr|A0A0A6KWM0|A0A0A6KWM0_CANAX; tr|A0A0A6K9D4|A0A0A6K9D4_CANAX; tr|A0A0A6K455|A0A0A6K455_CANAX; tr|A0A0A6JWU4|A0A0A6JWU4_CANAX; tr|A0A0A6J9A0|A0A0A6J9A0_CANAX; tr|A0A0A6J199|A0A0A6J19…	Elongation factor 1-alpha OS=Candida albicans (strain WO-1) GN=CAWG_00588 PE=3 SV=1; Elongation factor 1-alpha OS=Candida albicans (strain SC5314 / ATCC MYA-2876) GN=I503_00814 PE=3 SV=1; Elongation factor 1-alpha OS=Candida albicans (strain SC5314 / ATCC MYA-2876) GN=W5Q_02251 PE=3 SV=1; Elongation factor 1-alpha OS=Candida albicans P78042 GN=MGS_00808 PE=3 SV=1; Elongation factor 1-alpha OS=Can…			0	99	FAVRDMRQTVAVGVIKSVEKSDKAGKVTK	Oxidation(M)@6	missed R-D@4; missed R-Q@7; missed K-S@16; missed K-S@20; missed K-A@23; missed K-V@26	-0.000437627	3162.75	791.696	3162.75	791.696	4	11	1.1.1.1772.19	1	16.9436	1492.99	16.8678
1	93.17	93.17	63.97	63.97	63.97	tr|C4YDJ3|C4YDJ3_CANAW; tr|A0A0A6Q741|A0A0A6Q741_CANAL; tr|A0A0A6M7H0|A0A0A6M7H0_CANAL; tr|A0A0A6M386|A0A0A6M386_CANAX; tr|A0A0A6LGT0|A0A0A6LGT0_CANAX; tr|A0A0A6L5Y0|A0A0A6L5Y0_CANAX; tr|A0A0A6L1C0|A0A0A6L1C0_CANAX; tr|A0A0A6KWM0|A0A0A6KWM0_CANAX; tr|A0A0A6K9D4|A0A0A6K9D4_CANAX; tr|A0A0A6K455|A0A0A6K455_CANAX; tr|A0A0A6JWU4|A0A0A6JWU4_CANAX; tr|A0A0A6J9A0|A0A0A6J9A0_CANAX; tr|A0A0A6J199|A0A0A6J19…	Elongation factor 1-alpha OS=Candida albicans (strain WO-1) GN=CAWG_00588 PE=3 SV=1; Elongation factor 1-alpha OS=Candida albicans (strain SC5314 / ATCC MYA-2876) GN=I503_00814 PE=3 SV=1; Elongation factor 1-alpha OS=Candida albicans (strain SC5314 / ATCC MYA-2876) GN=W5Q_02251 PE=3 SV=1; Elongation factor 1-alpha OS=Candida albicans P78042 GN=MGS_00808 PE=3 SV=1; Elongation factor 1-alpha OS=Can…			0	99	FAVRDMRQTVAVGVIKSVEKSDKAGKVTKAAQK	Oxidation(M)@6	missed R-D@4; missed R-Q@7; missed K-S@16; missed K-S@20; missed K-A@23; missed K-V@26; missed K-A@29	-0.0116934	3560.97	594.502	3560.98	594.504	6	16	1.1.1.1745.13	1	15.849	2217.23	15.9437
1	93.17	93.17	63.97	63.97	63.97	tr|C4YDJ3|C4YDJ3_CANAW; tr|A0A0A6Q741|A0A0A6Q741_CANAL; tr|A0A0A6M7H0|A0A0A6M7H0_CANAL; tr|A0A0A6M386|A0A0A6M386_CANAX; tr|A0A0A6LGT0|A0A0A6LGT0_CANAX; tr|A0A0A6L5Y0|A0A0A6L5Y0_CANAX; tr|A0A0A6L1C0|A0A0A6L1C0_CANAX; tr|A0A0A6KWM0|A0A0A6KWM0_CANAX; tr|A0A0A6K9D4|A0A0A6K9D4_CANAX; tr|A0A0A6K455|A0A0A6K455_CANAX; tr|A0A0A6JWU4|A0A0A6JWU4_CANAX; tr|A0A0A6J9A0|A0A0A6J9A0_CANAX; tr|A0A0A6J199|A0A0A6J19…	Elongation factor 1-alpha OS=Candida albicans (strain WO-1) GN=CAWG_00588 PE=3 SV=1; Elongation factor 1-alpha OS=Candida albicans (strain SC5314 / ATCC MYA-2876) GN=I503_00814 PE=3 SV=1; Elongation factor 1-alpha OS=Candida albicans (strain SC5314 / ATCC MYA-2876) GN=W5Q_02251 PE=3 SV=1; Elongation factor 1-alpha OS=Candida albicans P78042 GN=MGS_00808 PE=3 SV=1; Elongation factor 1-alpha OS=Can…			0	99	FAVRDMRQTVAVGVIKSVEKSDKAGKVTKAAQK	Oxidation(M)@6	missed R-D@4; missed R-Q@7; missed K-S@16; missed K-S@20; missed K-A@23; missed K-V@26; missed K-A@29	-0.0120287	3560.97	713.201	3560.98	713.204	5	14	1.1.1.1751.17	1	16.0967	1343.54	15.9437
1	93.17	93.17	63.97	63.97	63.97	tr|C4YDJ3|C4YDJ3_CANAW; tr|A0A0A6Q741|A0A0A6Q741_CANAL; tr|A0A0A6M7H0|A0A0A6M7H0_CANAL; tr|A0A0A6M386|A0A0A6M386_CANAX; tr|A0A0A6LGT0|A0A0A6LGT0_CANAX; tr|A0A0A6L5Y0|A0A0A6L5Y0_CANAX; tr|A0A0A6L1C0|A0A0A6L1C0_CANAX; tr|A0A0A6KWM0|A0A0A6KWM0_CANAX; tr|A0A0A6K9D4|A0A0A6K9D4_CANAX; tr|A0A0A6K455|A0A0A6K455_CANAX; tr|A0A0A6JWU4|A0A0A6JWU4_CANAX; tr|A0A0A6J9A0|A0A0A6J9A0_CANAX; tr|A0A0A6J199|A0A0A6J19…	Elongation factor 1-alpha OS=Candida albicans (strain WO-1) GN=CAWG_00588 PE=3 SV=1; Elongation factor 1-alpha OS=Candida albicans (strain SC5314 / ATCC MYA-2876) GN=I503_00814 PE=3 SV=1; Elongation factor 1-alpha OS=Candida albicans (strain SC5314 / ATCC MYA-2876) GN=W5Q_02251 PE=3 SV=1; Elongation factor 1-alpha OS=Candida albicans P78042 GN=MGS_00808 PE=3 SV=1; Elongation factor 1-alpha OS=Can…			0	99	FAVRDMRQTVAVGVIKSVEKSDKAGKVTKAAQK	Oxidation(R)@7	missed R-D@4; missed R-Q@7; missed K-S@16; missed K-S@20; missed K-A@23; missed K-V@26; missed K-A@29	-0.0116934	3560.97	594.502	3560.98	594.504	6	20	1.1.1.1748.13	1	15.9694	2217.23	15.9437
1	93.17	93.17	63.97	63.97	63.97	tr|C4YDJ3|C4YDJ3_CANAW; tr|A0A0A6Q741|A0A0A6Q741_CANAL; tr|A0A0A6M7H0|A0A0A6M7H0_CANAL; tr|A0A0A6M386|A0A0A6M386_CANAX; tr|A0A0A6LGT0|A0A0A6LGT0_CANAX; tr|A0A0A6L5Y0|A0A0A6L5Y0_CANAX; tr|A0A0A6L1C0|A0A0A6L1C0_CANAX; tr|A0A0A6KWM0|A0A0A6KWM0_CANAX; tr|A0A0A6K9D4|A0A0A6K9D4_CANAX; tr|A0A0A6K455|A0A0A6K455_CANAX; tr|A0A0A6JWU4|A0A0A6JWU4_CANAX; tr|A0A0A6J9A0|A0A0A6J9A0_CANAX; tr|A0A0A6J199|A0A0A6J19…	Elongation factor 1-alpha OS=Candida albicans (strain WO-1) GN=CAWG_00588 PE=3 SV=1; Elongation factor 1-alpha OS=Candida albicans (strain SC5314 / ATCC MYA-2876) GN=I503_00814 PE=3 SV=1; Elongation factor 1-alpha OS=Candida albicans (strain SC5314 / ATCC MYA-2876) GN=W5Q_02251 PE=3 SV=1; Elongation factor 1-alpha OS=Candida albicans P78042 GN=MGS_00808 PE=3 SV=1; Elongation factor 1-alpha OS=Can…			0	99	FAVRDMRQTVAVGVIKSVEKSDKAGKVTKAAQK	Oxidation(M)@6	missed R-D@4; missed R-Q@7; missed K-S@16; missed K-S@20; missed K-A@23; missed K-V@26; missed K-A@29	-0.0154691	3560.97	509.717	3560.98	509.719	7	12	1.1.1.1749.7	1	15.9996	1856.02	15.9437
1	93.17	93.17	63.97	63.97	63.97	tr|C4YDJ3|C4YDJ3_CANAW; tr|A0A0A6Q741|A0A0A6Q741_CANAL; tr|A0A0A6M7H0|A0A0A6M7H0_CANAL; tr|A0A0A6M386|A0A0A6M386_CANAX; tr|A0A0A6LGT0|A0A0A6LGT0_CANAX; tr|A0A0A6L5Y0|A0A0A6L5Y0_CANAX; tr|A0A0A6L1C0|A0A0A6L1C0_CANAX; tr|A0A0A6KWM0|A0A0A6KWM0_CANAX; tr|A0A0A6K9D4|A0A0A6K9D4_CANAX; tr|A0A0A6K455|A0A0A6K455_CANAX; tr|A0A0A6JWU4|A0A0A6JWU4_CANAX; tr|A0A0A6J9A0|A0A0A6J9A0_CANAX; tr|A0A0A6J199|A0A0A6J19…	Elongation factor 1-alpha OS=Candida albicans (strain WO-1) GN=CAWG_00588 PE=3 SV=1; Elongation factor 1-alpha OS=Candida albicans (strain SC5314 / ATCC MYA-2876) GN=I503_00814 PE=3 SV=1; Elongation factor 1-alpha OS=Candida albicans (strain SC5314 / ATCC MYA-2876) GN=W5Q_02251 PE=3 SV=1; Elongation factor 1-alpha OS=Candida albicans P78042 GN=MGS_00808 PE=3 SV=1; Elongation factor 1-alpha OS=Can…			0	87.98	FAVRDMRQTVAVGVIKSVEKSDKAGKVTKAAQK	Oxidation(M)@6	missed R-D@4; missed R-Q@7; missed K-S@16; missed K-S@20; missed K-A@23; missed K-V@26; missed K-A@29	-0.0116934	3560.97	594.502	3560.98	594.504	6	10	1.1.1.1751.12	1	16.0883	2217.23	15.9437
1	93.17	93.17	63.97	63.97	63.97	tr|C4YDJ3|C4YDJ3_CANAW; tr|A0A0A6Q741|A0A0A6Q741_CANAL; tr|A0A0A6M7H0|A0A0A6M7H0_CANAL; tr|A0A0A6M386|A0A0A6M386_CANAX; tr|A0A0A6LGT0|A0A0A6LGT0_CANAX; tr|A0A0A6L5Y0|A0A0A6L5Y0_CANAX; tr|A0A0A6L1C0|A0A0A6L1C0_CANAX; tr|A0A0A6KWM0|A0A0A6KWM0_CANAX; tr|A0A0A6K9D4|A0A0A6K9D4_CANAX; tr|A0A0A6K455|A0A0A6K455_CANAX; tr|A0A0A6JWU4|A0A0A6JWU4_CANAX; tr|A0A0A6J9A0|A0A0A6J9A0_CANAX; tr|A0A0A6J199|A0A0A6J19…	Elongation factor 1-alpha OS=Candida albicans (strain WO-1) GN=CAWG_00588 PE=3 SV=1; Elongation factor 1-alpha OS=Candida albicans (strain SC5314 / ATCC MYA-2876) GN=I503_00814 PE=3 SV=1; Elongation factor 1-alpha OS=Candida albicans (strain SC5314 / ATCC MYA-2876) GN=W5Q_02251 PE=3 SV=1; Elongation factor 1-alpha OS=Candida albicans P78042 GN=MGS_00808 PE=3 SV=1; Elongation factor 1-alpha OS=Can…			0	97.16	FDTLVEKIDRR		missed K-I@7; missed R-R@10	-0.000456479	1390.76	464.593	1390.76	464.593	3	9	1.1.1.1785.5	1	17.443	3504.73	17.5108
1	93.17	93.17	63.97	63.97	63.97	tr|C4YDJ3|C4YDJ3_CANAW; tr|A0A0A6Q741|A0A0A6Q741_CANAL; tr|A0A0A6M7H0|A0A0A6M7H0_CANAL; tr|A0A0A6M386|A0A0A6M386_CANAX; tr|A0A0A6LGT0|A0A0A6LGT0_CANAX; tr|A0A0A6L5Y0|A0A0A6L5Y0_CANAX; tr|A0A0A6L1C0|A0A0A6L1C0_CANAX; tr|A0A0A6KWM0|A0A0A6KWM0_CANAX; tr|A0A0A6K9D4|A0A0A6K9D4_CANAX; tr|A0A0A6K455|A0A0A6K455_CANAX; tr|A0A0A6JWU4|A0A0A6JWU4_CANAX; tr|A0A0A6J9A0|A0A0A6J9A0_CANAX; tr|A0A0A6J199|A0A0A6J19…	Elongation factor 1-alpha OS=Candida albicans (strain WO-1) GN=CAWG_00588 PE=3 SV=1; Elongation factor 1-alpha OS=Candida albicans (strain SC5314 / ATCC MYA-2876) GN=I503_00814 PE=3 SV=1; Elongation factor 1-alpha OS=Candida albicans (strain SC5314 / ATCC MYA-2876) GN=W5Q_02251 PE=3 SV=1; Elongation factor 1-alpha OS=Candida albicans P78042 GN=MGS_00808 PE=3 SV=1; Elongation factor 1-alpha OS=Can…			0	96.08	FDTLVEKIDRR		missed K-I@7; missed R-R@10	-0.000456479	1390.76	464.593	1390.76	464.593	3	9	1.1.1.1791.3	1	17.68	3504.73	17.5108
1	93.17	93.17	63.97	63.97	63.97	tr|C4YDJ3|C4YDJ3_CANAW; tr|A0A0A6Q741|A0A0A6Q741_CANAL; tr|A0A0A6M7H0|A0A0A6M7H0_CANAL; tr|A0A0A6M386|A0A0A6M386_CANAX; tr|A0A0A6LGT0|A0A0A6LGT0_CANAX; tr|A0A0A6L5Y0|A0A0A6L5Y0_CANAX; tr|A0A0A6L1C0|A0A0A6L1C0_CANAX; tr|A0A0A6KWM0|A0A0A6KWM0_CANAX; tr|A0A0A6K9D4|A0A0A6K9D4_CANAX; tr|A0A0A6K455|A0A0A6K455_CANAX; tr|A0A0A6JWU4|A0A0A6JWU4_CANAX; tr|A0A0A6J9A0|A0A0A6J9A0_CANAX; tr|A0A0A6J199|A0A0A6J19…	Elongation factor 1-alpha OS=Candida albicans (strain WO-1) GN=CAWG_00588 PE=3 SV=1; Elongation factor 1-alpha OS=Candida albicans (strain SC5314 / ATCC MYA-2876) GN=I503_00814 PE=3 SV=1; Elongation factor 1-alpha OS=Candida albicans (strain SC5314 / ATCC MYA-2876) GN=W5Q_02251 PE=3 SV=1; Elongation factor 1-alpha OS=Candida albicans P78042 GN=MGS_00808 PE=3 SV=1; Elongation factor 1-alpha OS=Can…			0	17.08	FDTLVEKIDRRTGKKLEENPKFVK		missed K-I@7; missed R-R@10; missed R-T@11; missed K-K@14; missed K-L@15; missed K-F@21	-0.00391863	2889.6	482.608	2889.61	482.609	6	7	1.1.1.1803.4	1	18.1649	1149.46	18.0331
1	93.17	93.17	63.97	63.97	63.97	tr|C4YDJ3|C4YDJ3_CANAW; tr|A0A0A6Q741|A0A0A6Q741_CANAL; tr|A0A0A6M7H0|A0A0A6M7H0_CANAL; tr|A0A0A6M386|A0A0A6M386_CANAX; tr|A0A0A6LGT0|A0A0A6LGT0_CANAX; tr|A0A0A6L5Y0|A0A0A6L5Y0_CANAX; tr|A0A0A6L1C0|A0A0A6L1C0_CANAX; tr|A0A0A6KWM0|A0A0A6KWM0_CANAX; tr|A0A0A6K9D4|A0A0A6K9D4_CANAX; tr|A0A0A6K455|A0A0A6K455_CANAX; tr|A0A0A6JWU4|A0A0A6JWU4_CANAX; tr|A0A0A6J9A0|A0A0A6J9A0_CANAX; tr|A0A0A6J199|A0A0A6J19…	Elongation factor 1-alpha OS=Candida albicans (strain WO-1) GN=CAWG_00588 PE=3 SV=1; Elongation factor 1-alpha OS=Candida albicans (strain SC5314 / ATCC MYA-2876) GN=I503_00814 PE=3 SV=1; Elongation factor 1-alpha OS=Candida albicans (strain SC5314 / ATCC MYA-2876) GN=W5Q_02251 PE=3 SV=1; Elongation factor 1-alpha OS=Candida albicans P78042 GN=MGS_00808 PE=3 SV=1; Elongation factor 1-alpha OS=Can…			0	70.19	FEKEAAELGKGSFK	GlnGlnGlnThrGlyGly(K)@3	missed K-E@3; missed K-G@10	0.0563172	2139.12	535.786	2139.06	535.772	4	10	1.1.1.1877.9	1	21.1297	16237.4	21.0331
1	93.17	93.17	63.97	63.97	63.97	tr|C4YDJ3|C4YDJ3_CANAW; tr|A0A0A6Q741|A0A0A6Q741_CANAL; tr|A0A0A6M7H0|A0A0A6M7H0_CANAL; tr|A0A0A6M386|A0A0A6M386_CANAX; tr|A0A0A6LGT0|A0A0A6LGT0_CANAX; tr|A0A0A6L5Y0|A0A0A6L5Y0_CANAX; tr|A0A0A6L1C0|A0A0A6L1C0_CANAX; tr|A0A0A6KWM0|A0A0A6KWM0_CANAX; tr|A0A0A6K9D4|A0A0A6K9D4_CANAX; tr|A0A0A6K455|A0A0A6K455_CANAX; tr|A0A0A6JWU4|A0A0A6JWU4_CANAX; tr|A0A0A6J9A0|A0A0A6J9A0_CANAX; tr|A0A0A6J199|A0A0A6J19…	Elongation factor 1-alpha OS=Candida albicans (strain WO-1) GN=CAWG_00588 PE=3 SV=1; Elongation factor 1-alpha OS=Candida albicans (strain SC5314 / ATCC MYA-2876) GN=I503_00814 PE=3 SV=1; Elongation factor 1-alpha OS=Candida albicans (strain SC5314 / ATCC MYA-2876) GN=W5Q_02251 PE=3 SV=1; Elongation factor 1-alpha OS=Candida albicans P78042 GN=MGS_00808 PE=3 SV=1; Elongation factor 1-alpha OS=Can…			0	99	GIGTVPVGRVETGIIKAGMVVTFAPAGVTTEVK	Oxidation(M)@19	cleaved G-G@N-term; missed R-V@9; missed K-A@16	-0.0136832	3269.79	818.455	3269.81	818.459	4	20	1.1.1.2174.15	1	33.0219	1822.33	33.0731
1	93.17	93.17	63.97	63.97	63.97	tr|C4YDJ3|C4YDJ3_CANAW; tr|A0A0A6Q741|A0A0A6Q741_CANAL; tr|A0A0A6M7H0|A0A0A6M7H0_CANAL; tr|A0A0A6M386|A0A0A6M386_CANAX; tr|A0A0A6LGT0|A0A0A6LGT0_CANAX; tr|A0A0A6L5Y0|A0A0A6L5Y0_CANAX; tr|A0A0A6L1C0|A0A0A6L1C0_CANAX; tr|A0A0A6KWM0|A0A0A6KWM0_CANAX; tr|A0A0A6K9D4|A0A0A6K9D4_CANAX; tr|A0A0A6K455|A0A0A6K455_CANAX; tr|A0A0A6JWU4|A0A0A6JWU4_CANAX; tr|A0A0A6J9A0|A0A0A6J9A0_CANAX; tr|A0A0A6J199|A0A0A6J19…	Elongation factor 1-alpha OS=Candida albicans (strain WO-1) GN=CAWG_00588 PE=3 SV=1; Elongation factor 1-alpha OS=Candida albicans (strain SC5314 / ATCC MYA-2876) GN=I503_00814 PE=3 SV=1; Elongation factor 1-alpha OS=Candida albicans (strain SC5314 / ATCC MYA-2876) GN=W5Q_02251 PE=3 SV=1; Elongation factor 1-alpha OS=Candida albicans P78042 GN=MGS_00808 PE=3 SV=1; Elongation factor 1-alpha OS=Can…			0	99	GKEKTHVNVVVIGHVDSGK	Trimethyl(K)@4	cleaved M-G@N-term; missed K-E@2; missed K-T@4	-0.000933289	2044.14	512.043	2044.14	512.043	4	24	1.1.1.1597.5	1	9.9408	936.816	9.7932
1	93.17	93.17	63.97	63.97	63.97	tr|C4YDJ3|C4YDJ3_CANAW; tr|A0A0A6Q741|A0A0A6Q741_CANAL; tr|A0A0A6M7H0|A0A0A6M7H0_CANAL; tr|A0A0A6M386|A0A0A6M386_CANAX; tr|A0A0A6LGT0|A0A0A6LGT0_CANAX; tr|A0A0A6L5Y0|A0A0A6L5Y0_CANAX; tr|A0A0A6L1C0|A0A0A6L1C0_CANAX; tr|A0A0A6KWM0|A0A0A6KWM0_CANAX; tr|A0A0A6K9D4|A0A0A6K9D4_CANAX; tr|A0A0A6K455|A0A0A6K455_CANAX; tr|A0A0A6JWU4|A0A0A6JWU4_CANAX; tr|A0A0A6J9A0|A0A0A6J9A0_CANAX; tr|A0A0A6J199|A0A0A6J19…	Elongation factor 1-alpha OS=Candida albicans (strain WO-1) GN=CAWG_00588 PE=3 SV=1; Elongation factor 1-alpha OS=Candida albicans (strain SC5314 / ATCC MYA-2876) GN=I503_00814 PE=3 SV=1; Elongation factor 1-alpha OS=Candida albicans (strain SC5314 / ATCC MYA-2876) GN=W5Q_02251 PE=3 SV=1; Elongation factor 1-alpha OS=Candida albicans P78042 GN=MGS_00808 PE=3 SV=1; Elongation factor 1-alpha OS=Can…			0	99	GKEKTHVNVVVIGHVDSGK	Trimethyl(K)@4	cleaved M-G@N-term; missed K-E@2; missed K-T@4	-0.000933289	2044.14	512.043	2044.14	512.043	4	21	1.1.1.1604.3	1	10.2092	929.248	9.7932
1	93.17	93.17	63.97	63.97	63.97	tr|C4YDJ3|C4YDJ3_CANAW; tr|A0A0A6Q741|A0A0A6Q741_CANAL; tr|A0A0A6M7H0|A0A0A6M7H0_CANAL; tr|A0A0A6M386|A0A0A6M386_CANAX; tr|A0A0A6LGT0|A0A0A6LGT0_CANAX; tr|A0A0A6L5Y0|A0A0A6L5Y0_CANAX; tr|A0A0A6L1C0|A0A0A6L1C0_CANAX; tr|A0A0A6KWM0|A0A0A6KWM0_CANAX; tr|A0A0A6K9D4|A0A0A6K9D4_CANAX; tr|A0A0A6K455|A0A0A6K455_CANAX; tr|A0A0A6JWU4|A0A0A6JWU4_CANAX; tr|A0A0A6J9A0|A0A0A6J9A0_CANAX; tr|A0A0A6J199|A0A0A6J19…	Elongation factor 1-alpha OS=Candida albicans (strain WO-1) GN=CAWG_00588 PE=3 SV=1; Elongation factor 1-alpha OS=Candida albicans (strain SC5314 / ATCC MYA-2876) GN=I503_00814 PE=3 SV=1; Elongation factor 1-alpha OS=Candida albicans (strain SC5314 / ATCC MYA-2876) GN=W5Q_02251 PE=3 SV=1; Elongation factor 1-alpha OS=Candida albicans P78042 GN=MGS_00808 PE=3 SV=1; Elongation factor 1-alpha OS=Can…			0	99	GKEKTHVNVVVIGHVDSGK	Trimethyl(K)@4	cleaved M-G@N-term; missed K-E@2; missed K-T@4	0.000111071	2044.14	409.836	2044.14	409.836	5	18	1.1.1.1596.2	1	9.8878	1506.06	9.7932
1	93.17	93.17	63.97	63.97	63.97	tr|C4YDJ3|C4YDJ3_CANAW; tr|A0A0A6Q741|A0A0A6Q741_CANAL; tr|A0A0A6M7H0|A0A0A6M7H0_CANAL; tr|A0A0A6M386|A0A0A6M386_CANAX; tr|A0A0A6LGT0|A0A0A6LGT0_CANAX; tr|A0A0A6L5Y0|A0A0A6L5Y0_CANAX; tr|A0A0A6L1C0|A0A0A6L1C0_CANAX; tr|A0A0A6KWM0|A0A0A6KWM0_CANAX; tr|A0A0A6K9D4|A0A0A6K9D4_CANAX; tr|A0A0A6K455|A0A0A6K455_CANAX; tr|A0A0A6JWU4|A0A0A6JWU4_CANAX; tr|A0A0A6J9A0|A0A0A6J9A0_CANAX; tr|A0A0A6J199|A0A0A6J19…	Elongation factor 1-alpha OS=Candida albicans (strain WO-1) GN=CAWG_00588 PE=3 SV=1; Elongation factor 1-alpha OS=Candida albicans (strain SC5314 / ATCC MYA-2876) GN=I503_00814 PE=3 SV=1; Elongation factor 1-alpha OS=Candida albicans (strain SC5314 / ATCC MYA-2876) GN=W5Q_02251 PE=3 SV=1; Elongation factor 1-alpha OS=Candida albicans P78042 GN=MGS_00808 PE=3 SV=1; Elongation factor 1-alpha OS=Can…			0	99	GKEKTHVNVVVIGHVDSGK	Trimethyl(K)@4	cleaved M-G@N-term; missed K-E@2; missed K-T@4	0.000111071	2044.14	409.836	2044.14	409.836	5	18	1.1.1.1599.2	1	10.0067	1506.06	9.7932
1	93.17	93.17	63.97	63.97	63.97	tr|C4YDJ3|C4YDJ3_CANAW; tr|A0A0A6Q741|A0A0A6Q741_CANAL; tr|A0A0A6M7H0|A0A0A6M7H0_CANAL; tr|A0A0A6M386|A0A0A6M386_CANAX; tr|A0A0A6LGT0|A0A0A6LGT0_CANAX; tr|A0A0A6L5Y0|A0A0A6L5Y0_CANAX; tr|A0A0A6L1C0|A0A0A6L1C0_CANAX; tr|A0A0A6KWM0|A0A0A6KWM0_CANAX; tr|A0A0A6K9D4|A0A0A6K9D4_CANAX; tr|A0A0A6K455|A0A0A6K455_CANAX; tr|A0A0A6JWU4|A0A0A6JWU4_CANAX; tr|A0A0A6J9A0|A0A0A6J9A0_CANAX; tr|A0A0A6J199|A0A0A6J19…	Elongation factor 1-alpha OS=Candida albicans (strain WO-1) GN=CAWG_00588 PE=3 SV=1; Elongation factor 1-alpha OS=Candida albicans (strain SC5314 / ATCC MYA-2876) GN=I503_00814 PE=3 SV=1; Elongation factor 1-alpha OS=Candida albicans (strain SC5314 / ATCC MYA-2876) GN=W5Q_02251 PE=3 SV=1; Elongation factor 1-alpha OS=Candida albicans P78042 GN=MGS_00808 PE=3 SV=1; Elongation factor 1-alpha OS=Can…			0	99	GKEKTHVNVVVIGHVDSGK	Trimethyl(K)@4	cleaved M-G@N-term; missed K-E@2; missed K-T@4	-0.00166569	2044.14	512.043	2044.14	512.043	4	18	1.1.1.1624.4	1	11.0072	235.033	10.9801
1	93.17	93.17	63.97	63.97	63.97	tr|C4YDJ3|C4YDJ3_CANAW; tr|A0A0A6Q741|A0A0A6Q741_CANAL; tr|A0A0A6M7H0|A0A0A6M7H0_CANAL; tr|A0A0A6M386|A0A0A6M386_CANAX; tr|A0A0A6LGT0|A0A0A6LGT0_CANAX; tr|A0A0A6L5Y0|A0A0A6L5Y0_CANAX; tr|A0A0A6L1C0|A0A0A6L1C0_CANAX; tr|A0A0A6KWM0|A0A0A6KWM0_CANAX; tr|A0A0A6K9D4|A0A0A6K9D4_CANAX; tr|A0A0A6K455|A0A0A6K455_CANAX; tr|A0A0A6JWU4|A0A0A6JWU4_CANAX; tr|A0A0A6J9A0|A0A0A6J9A0_CANAX; tr|A0A0A6J199|A0A0A6J19…	Elongation factor 1-alpha OS=Candida albicans (strain WO-1) GN=CAWG_00588 PE=3 SV=1; Elongation factor 1-alpha OS=Candida albicans (strain SC5314 / ATCC MYA-2876) GN=I503_00814 PE=3 SV=1; Elongation factor 1-alpha OS=Candida albicans (strain SC5314 / ATCC MYA-2876) GN=W5Q_02251 PE=3 SV=1; Elongation factor 1-alpha OS=Candida albicans P78042 GN=MGS_00808 PE=3 SV=1; Elongation factor 1-alpha OS=Can…			0	99	GKEKTHVNVVVIGHVDSGK	Trimethyl(K)@4	cleaved M-G@N-term; missed K-E@2; missed K-T@4	0.000111071	2044.14	409.836	2044.14	409.836	5	17	1.1.1.1590.2	1	9.6549	1506.06	9.7932
1	93.17	93.17	63.97	63.97	63.97	tr|C4YDJ3|C4YDJ3_CANAW; tr|A0A0A6Q741|A0A0A6Q741_CANAL; tr|A0A0A6M7H0|A0A0A6M7H0_CANAL; tr|A0A0A6M386|A0A0A6M386_CANAX; tr|A0A0A6LGT0|A0A0A6LGT0_CANAX; tr|A0A0A6L5Y0|A0A0A6L5Y0_CANAX; tr|A0A0A6L1C0|A0A0A6L1C0_CANAX; tr|A0A0A6KWM0|A0A0A6KWM0_CANAX; tr|A0A0A6K9D4|A0A0A6K9D4_CANAX; tr|A0A0A6K455|A0A0A6K455_CANAX; tr|A0A0A6JWU4|A0A0A6JWU4_CANAX; tr|A0A0A6J9A0|A0A0A6J9A0_CANAX; tr|A0A0A6J199|A0A0A6J19…	Elongation factor 1-alpha OS=Candida albicans (strain WO-1) GN=CAWG_00588 PE=3 SV=1; Elongation factor 1-alpha OS=Candida albicans (strain SC5314 / ATCC MYA-2876) GN=I503_00814 PE=3 SV=1; Elongation factor 1-alpha OS=Candida albicans (strain SC5314 / ATCC MYA-2876) GN=W5Q_02251 PE=3 SV=1; Elongation factor 1-alpha OS=Candida albicans P78042 GN=MGS_00808 PE=3 SV=1; Elongation factor 1-alpha OS=Can…			0	99	GKEKTHVNVVVIGHVDSGK	Trimethyl(K)@4	cleaved M-G@N-term; missed K-E@2; missed K-T@4	0.000111071	2044.14	409.836	2044.14	409.836	5	16	1.1.1.1593.2	1	9.7738	1506.06	9.7932
1	93.17	93.17	63.97	63.97	63.97	tr|C4YDJ3|C4YDJ3_CANAW; tr|A0A0A6Q741|A0A0A6Q741_CANAL; tr|A0A0A6M7H0|A0A0A6M7H0_CANAL; tr|A0A0A6M386|A0A0A6M386_CANAX; tr|A0A0A6LGT0|A0A0A6LGT0_CANAX; tr|A0A0A6L5Y0|A0A0A6L5Y0_CANAX; tr|A0A0A6L1C0|A0A0A6L1C0_CANAX; tr|A0A0A6KWM0|A0A0A6KWM0_CANAX; tr|A0A0A6K9D4|A0A0A6K9D4_CANAX; tr|A0A0A6K455|A0A0A6K455_CANAX; tr|A0A0A6JWU4|A0A0A6JWU4_CANAX; tr|A0A0A6J9A0|A0A0A6J9A0_CANAX; tr|A0A0A6J199|A0A0A6J19…	Elongation factor 1-alpha OS=Candida albicans (strain WO-1) GN=CAWG_00588 PE=3 SV=1; Elongation factor 1-alpha OS=Candida albicans (strain SC5314 / ATCC MYA-2876) GN=I503_00814 PE=3 SV=1; Elongation factor 1-alpha OS=Candida albicans (strain SC5314 / ATCC MYA-2876) GN=W5Q_02251 PE=3 SV=1; Elongation factor 1-alpha OS=Candida albicans P78042 GN=MGS_00808 PE=3 SV=1; Elongation factor 1-alpha OS=Can…			0	99	GKEKTHVNVVVIGHVDSGK	Trimethyl(K)@2	cleaved M-G@N-term; missed K-E@2; missed K-T@4	0.000111071	2044.14	409.836	2044.14	409.836	5	16	1.1.1.1602.2	1	10.1213	1506.06	9.7932
1	93.17	93.17	63.97	63.97	63.97	tr|C4YDJ3|C4YDJ3_CANAW; tr|A0A0A6Q741|A0A0A6Q741_CANAL; tr|A0A0A6M7H0|A0A0A6M7H0_CANAL; tr|A0A0A6M386|A0A0A6M386_CANAX; tr|A0A0A6LGT0|A0A0A6LGT0_CANAX; tr|A0A0A6L5Y0|A0A0A6L5Y0_CANAX; tr|A0A0A6L1C0|A0A0A6L1C0_CANAX; tr|A0A0A6KWM0|A0A0A6KWM0_CANAX; tr|A0A0A6K9D4|A0A0A6K9D4_CANAX; tr|A0A0A6K455|A0A0A6K455_CANAX; tr|A0A0A6JWU4|A0A0A6JWU4_CANAX; tr|A0A0A6J9A0|A0A0A6J9A0_CANAX; tr|A0A0A6J199|A0A0A6J19…	Elongation factor 1-alpha OS=Candida albicans (strain WO-1) GN=CAWG_00588 PE=3 SV=1; Elongation factor 1-alpha OS=Candida albicans (strain SC5314 / ATCC MYA-2876) GN=I503_00814 PE=3 SV=1; Elongation factor 1-alpha OS=Candida albicans (strain SC5314 / ATCC MYA-2876) GN=W5Q_02251 PE=3 SV=1; Elongation factor 1-alpha OS=Candida albicans P78042 GN=MGS_00808 PE=3 SV=1; Elongation factor 1-alpha OS=Can…			0	99	GKEKTHVNVVVIGHVDSGK	Trimethyl(K)@4	cleaved M-G@N-term; missed K-E@2; missed K-T@4	0.00148433	2044.14	409.836	2044.14	409.836	5	16	1.1.1.1617.2	1	10.7165	466.208	10.3477
1	93.17	93.17	63.97	63.97	63.97	tr|C4YDJ3|C4YDJ3_CANAW; tr|A0A0A6Q741|A0A0A6Q741_CANAL; tr|A0A0A6M7H0|A0A0A6M7H0_CANAL; tr|A0A0A6M386|A0A0A6M386_CANAX; tr|A0A0A6LGT0|A0A0A6LGT0_CANAX; tr|A0A0A6L5Y0|A0A0A6L5Y0_CANAX; tr|A0A0A6L1C0|A0A0A6L1C0_CANAX; tr|A0A0A6KWM0|A0A0A6KWM0_CANAX; tr|A0A0A6K9D4|A0A0A6K9D4_CANAX; tr|A0A0A6K455|A0A0A6K455_CANAX; tr|A0A0A6JWU4|A0A0A6JWU4_CANAX; tr|A0A0A6J9A0|A0A0A6J9A0_CANAX; tr|A0A0A6J199|A0A0A6J19…	Elongation factor 1-alpha OS=Candida albicans (strain WO-1) GN=CAWG_00588 PE=3 SV=1; Elongation factor 1-alpha OS=Candida albicans (strain SC5314 / ATCC MYA-2876) GN=I503_00814 PE=3 SV=1; Elongation factor 1-alpha OS=Candida albicans (strain SC5314 / ATCC MYA-2876) GN=W5Q_02251 PE=3 SV=1; Elongation factor 1-alpha OS=Candida albicans P78042 GN=MGS_00808 PE=3 SV=1; Elongation factor 1-alpha OS=Can…			0	99	GKEKTHVNVVVIGHVDSGK	Trimethyl(K)@4	cleaved M-G@N-term; missed K-E@2; missed K-T@4	-0.00239809	2044.14	512.042	2044.14	512.043	4	15	1.1.1.1628.6	1	11.1703	225.328	11.1396
1	93.17	93.17	63.97	63.97	63.97	tr|C4YDJ3|C4YDJ3_CANAW; tr|A0A0A6Q741|A0A0A6Q741_CANAL; tr|A0A0A6M7H0|A0A0A6M7H0_CANAL; tr|A0A0A6M386|A0A0A6M386_CANAX; tr|A0A0A6LGT0|A0A0A6LGT0_CANAX; tr|A0A0A6L5Y0|A0A0A6L5Y0_CANAX; tr|A0A0A6L1C0|A0A0A6L1C0_CANAX; tr|A0A0A6KWM0|A0A0A6KWM0_CANAX; tr|A0A0A6K9D4|A0A0A6K9D4_CANAX; tr|A0A0A6K455|A0A0A6K455_CANAX; tr|A0A0A6JWU4|A0A0A6JWU4_CANAX; tr|A0A0A6J9A0|A0A0A6J9A0_CANAX; tr|A0A0A6J199|A0A0A6J19…	Elongation factor 1-alpha OS=Candida albicans (strain WO-1) GN=CAWG_00588 PE=3 SV=1; Elongation factor 1-alpha OS=Candida albicans (strain SC5314 / ATCC MYA-2876) GN=I503_00814 PE=3 SV=1; Elongation factor 1-alpha OS=Candida albicans (strain SC5314 / ATCC MYA-2876) GN=W5Q_02251 PE=3 SV=1; Elongation factor 1-alpha OS=Candida albicans P78042 GN=MGS_00808 PE=3 SV=1; Elongation factor 1-alpha OS=Can…			0	99	GKEKTHVNVVVIGHVDSGK	Trimethyl(K)@4	cleaved M-G@N-term; missed K-E@2; missed K-T@4	-0.00654837	2044.14	512.041	2044.14	512.043	4	14	1.1.1.1643.8	1	11.7644	181.839	11.7388
1	93.17	93.17	63.97	63.97	63.97	tr|C4YDJ3|C4YDJ3_CANAW; tr|A0A0A6Q741|A0A0A6Q741_CANAL; tr|A0A0A6M7H0|A0A0A6M7H0_CANAL; tr|A0A0A6M386|A0A0A6M386_CANAX; tr|A0A0A6LGT0|A0A0A6LGT0_CANAX; tr|A0A0A6L5Y0|A0A0A6L5Y0_CANAX; tr|A0A0A6L1C0|A0A0A6L1C0_CANAX; tr|A0A0A6KWM0|A0A0A6KWM0_CANAX; tr|A0A0A6K9D4|A0A0A6K9D4_CANAX; tr|A0A0A6K455|A0A0A6K455_CANAX; tr|A0A0A6JWU4|A0A0A6JWU4_CANAX; tr|A0A0A6J9A0|A0A0A6J9A0_CANAX; tr|A0A0A6J199|A0A0A6J19…	Elongation factor 1-alpha OS=Candida albicans (strain WO-1) GN=CAWG_00588 PE=3 SV=1; Elongation factor 1-alpha OS=Candida albicans (strain SC5314 / ATCC MYA-2876) GN=I503_00814 PE=3 SV=1; Elongation factor 1-alpha OS=Candida albicans (strain SC5314 / ATCC MYA-2876) GN=W5Q_02251 PE=3 SV=1; Elongation factor 1-alpha OS=Candida albicans P78042 GN=MGS_00808 PE=3 SV=1; Elongation factor 1-alpha OS=Can…			0	99	GKEKTHVNVVVIGHVDSGK	Trimethyl(K)@4	cleaved M-G@N-term; missed K-E@2; missed K-T@4	-0.00166569	2044.14	512.043	2044.14	512.043	4	15	1.1.1.1620.5	1	10.856	235.398	10.7807
1	93.17	93.17	63.97	63.97	63.97	tr|C4YDJ3|C4YDJ3_CANAW; tr|A0A0A6Q741|A0A0A6Q741_CANAL; tr|A0A0A6M7H0|A0A0A6M7H0_CANAL; tr|A0A0A6M386|A0A0A6M386_CANAX; tr|A0A0A6LGT0|A0A0A6LGT0_CANAX; tr|A0A0A6L5Y0|A0A0A6L5Y0_CANAX; tr|A0A0A6L1C0|A0A0A6L1C0_CANAX; tr|A0A0A6KWM0|A0A0A6KWM0_CANAX; tr|A0A0A6K9D4|A0A0A6K9D4_CANAX; tr|A0A0A6K455|A0A0A6K455_CANAX; tr|A0A0A6JWU4|A0A0A6JWU4_CANAX; tr|A0A0A6J9A0|A0A0A6J9A0_CANAX; tr|A0A0A6J199|A0A0A6J19…	Elongation factor 1-alpha OS=Candida albicans (strain WO-1) GN=CAWG_00588 PE=3 SV=1; Elongation factor 1-alpha OS=Candida albicans (strain SC5314 / ATCC MYA-2876) GN=I503_00814 PE=3 SV=1; Elongation factor 1-alpha OS=Candida albicans (strain SC5314 / ATCC MYA-2876) GN=W5Q_02251 PE=3 SV=1; Elongation factor 1-alpha OS=Candida albicans P78042 GN=MGS_00808 PE=3 SV=1; Elongation factor 1-alpha OS=Can…			0	99	GKEKTHVNVVVIGHVDSGK	Trimethyl(K)@4	cleaved M-G@N-term; missed K-E@2; missed K-T@4	-0.00654837	2044.14	512.041	2044.14	512.043	4	15	1.1.1.1640.7	1	11.6497	181.839	11.7388
1	93.17	93.17	63.97	63.97	63.97	tr|C4YDJ3|C4YDJ3_CANAW; tr|A0A0A6Q741|A0A0A6Q741_CANAL; tr|A0A0A6M7H0|A0A0A6M7H0_CANAL; tr|A0A0A6M386|A0A0A6M386_CANAX; tr|A0A0A6LGT0|A0A0A6LGT0_CANAX; tr|A0A0A6L5Y0|A0A0A6L5Y0_CANAX; tr|A0A0A6L1C0|A0A0A6L1C0_CANAX; tr|A0A0A6KWM0|A0A0A6KWM0_CANAX; tr|A0A0A6K9D4|A0A0A6K9D4_CANAX; tr|A0A0A6K455|A0A0A6K455_CANAX; tr|A0A0A6JWU4|A0A0A6JWU4_CANAX; tr|A0A0A6J9A0|A0A0A6J9A0_CANAX; tr|A0A0A6J199|A0A0A6J19…	Elongation factor 1-alpha OS=Candida albicans (strain WO-1) GN=CAWG_00588 PE=3 SV=1; Elongation factor 1-alpha OS=Candida albicans (strain SC5314 / ATCC MYA-2876) GN=I503_00814 PE=3 SV=1; Elongation factor 1-alpha OS=Candida albicans (strain SC5314 / ATCC MYA-2876) GN=W5Q_02251 PE=3 SV=1; Elongation factor 1-alpha OS=Candida albicans P78042 GN=MGS_00808 PE=3 SV=1; Elongation factor 1-alpha OS=Can…			0	99	GKEKTHVNVVVIGHVDSGK	Trimethyl(K)@4	cleaved M-G@N-term; missed K-E@2; missed K-T@4	0.00102658	2044.14	409.836	2044.14	409.836	5	14	1.1.1.1621.3	1	10.8759	294.165	10.9402
1	93.17	93.17	63.97	63.97	63.97	tr|C4YDJ3|C4YDJ3_CANAW; tr|A0A0A6Q741|A0A0A6Q741_CANAL; tr|A0A0A6M7H0|A0A0A6M7H0_CANAL; tr|A0A0A6M386|A0A0A6M386_CANAX; tr|A0A0A6LGT0|A0A0A6LGT0_CANAX; tr|A0A0A6L5Y0|A0A0A6L5Y0_CANAX; tr|A0A0A6L1C0|A0A0A6L1C0_CANAX; tr|A0A0A6KWM0|A0A0A6KWM0_CANAX; tr|A0A0A6K9D4|A0A0A6K9D4_CANAX; tr|A0A0A6K455|A0A0A6K455_CANAX; tr|A0A0A6JWU4|A0A0A6JWU4_CANAX; tr|A0A0A6J9A0|A0A0A6J9A0_CANAX; tr|A0A0A6J199|A0A0A6J19…	Elongation factor 1-alpha OS=Candida albicans (strain WO-1) GN=CAWG_00588 PE=3 SV=1; Elongation factor 1-alpha OS=Candida albicans (strain SC5314 / ATCC MYA-2876) GN=I503_00814 PE=3 SV=1; Elongation factor 1-alpha OS=Candida albicans (strain SC5314 / ATCC MYA-2876) GN=W5Q_02251 PE=3 SV=1; Elongation factor 1-alpha OS=Candida albicans P78042 GN=MGS_00808 PE=3 SV=1; Elongation factor 1-alpha OS=Can…			0	99	GKEKTHVNVVVIGHVDSGK	Protein Terminal Acetyl@N-term	cleaved M-G@N-term; missed K-E@2; missed K-T@4	0.0369543	2044.14	409.836	2044.11	409.829	5	11	1.1.1.1635.2	1	11.4282	250.359	11.619
1	93.17	93.17	63.97	63.97	63.97	tr|C4YDJ3|C4YDJ3_CANAW; tr|A0A0A6Q741|A0A0A6Q741_CANAL; tr|A0A0A6M7H0|A0A0A6M7H0_CANAL; tr|A0A0A6M386|A0A0A6M386_CANAX; tr|A0A0A6LGT0|A0A0A6LGT0_CANAX; tr|A0A0A6L5Y0|A0A0A6L5Y0_CANAX; tr|A0A0A6L1C0|A0A0A6L1C0_CANAX; tr|A0A0A6KWM0|A0A0A6KWM0_CANAX; tr|A0A0A6K9D4|A0A0A6K9D4_CANAX; tr|A0A0A6K455|A0A0A6K455_CANAX; tr|A0A0A6JWU4|A0A0A6JWU4_CANAX; tr|A0A0A6J9A0|A0A0A6J9A0_CANAX; tr|A0A0A6J199|A0A0A6J19…	Elongation factor 1-alpha OS=Candida albicans (strain WO-1) GN=CAWG_00588 PE=3 SV=1; Elongation factor 1-alpha OS=Candida albicans (strain SC5314 / ATCC MYA-2876) GN=I503_00814 PE=3 SV=1; Elongation factor 1-alpha OS=Candida albicans (strain SC5314 / ATCC MYA-2876) GN=W5Q_02251 PE=3 SV=1; Elongation factor 1-alpha OS=Candida albicans P78042 GN=MGS_00808 PE=3 SV=1; Elongation factor 1-alpha OS=Can…			0	99	GKEKTHVNVVVIGHVDSGK	Protein Terminal Acetyl@N-term	cleaved M-G@N-term; missed K-E@2; missed K-T@4	0.0378698	2044.14	409.836	2044.11	409.829	5	12	1.1.1.1614.2	1	10.5923	373.077	10.5822
1	93.17	93.17	63.97	63.97	63.97	tr|C4YDJ3|C4YDJ3_CANAW; tr|A0A0A6Q741|A0A0A6Q741_CANAL; tr|A0A0A6M7H0|A0A0A6M7H0_CANAL; tr|A0A0A6M386|A0A0A6M386_CANAX; tr|A0A0A6LGT0|A0A0A6LGT0_CANAX; tr|A0A0A6L5Y0|A0A0A6L5Y0_CANAX; tr|A0A0A6L1C0|A0A0A6L1C0_CANAX; tr|A0A0A6KWM0|A0A0A6KWM0_CANAX; tr|A0A0A6K9D4|A0A0A6K9D4_CANAX; tr|A0A0A6K455|A0A0A6K455_CANAX; tr|A0A0A6JWU4|A0A0A6JWU4_CANAX; tr|A0A0A6J9A0|A0A0A6J9A0_CANAX; tr|A0A0A6J199|A0A0A6J19…	Elongation factor 1-alpha OS=Candida albicans (strain WO-1) GN=CAWG_00588 PE=3 SV=1; Elongation factor 1-alpha OS=Candida albicans (strain SC5314 / ATCC MYA-2876) GN=I503_00814 PE=3 SV=1; Elongation factor 1-alpha OS=Candida albicans (strain SC5314 / ATCC MYA-2876) GN=W5Q_02251 PE=3 SV=1; Elongation factor 1-alpha OS=Candida albicans P78042 GN=MGS_00808 PE=3 SV=1; Elongation factor 1-alpha OS=Can…			0	98.12	GKEKTHVNVVVIGHVDSGK	Trimethyl(K)@4	cleaved M-G@N-term; missed K-E@2; missed K-T@4	0.000568823	2044.14	409.836	2044.14	409.836	5	10	1.1.1.1642.2	1	11.7077	250.359	11.619
1	93.17	93.17	63.97	63.97	63.97	tr|C4YDJ3|C4YDJ3_CANAW; tr|A0A0A6Q741|A0A0A6Q741_CANAL; tr|A0A0A6M7H0|A0A0A6M7H0_CANAL; tr|A0A0A6M386|A0A0A6M386_CANAX; tr|A0A0A6LGT0|A0A0A6LGT0_CANAX; tr|A0A0A6L5Y0|A0A0A6L5Y0_CANAX; tr|A0A0A6L1C0|A0A0A6L1C0_CANAX; tr|A0A0A6KWM0|A0A0A6KWM0_CANAX; tr|A0A0A6K9D4|A0A0A6K9D4_CANAX; tr|A0A0A6K455|A0A0A6K455_CANAX; tr|A0A0A6JWU4|A0A0A6JWU4_CANAX; tr|A0A0A6J9A0|A0A0A6J9A0_CANAX; tr|A0A0A6J199|A0A0A6J19…	Elongation factor 1-alpha OS=Candida albicans (strain WO-1) GN=CAWG_00588 PE=3 SV=1; Elongation factor 1-alpha OS=Candida albicans (strain SC5314 / ATCC MYA-2876) GN=I503_00814 PE=3 SV=1; Elongation factor 1-alpha OS=Candida albicans (strain SC5314 / ATCC MYA-2876) GN=W5Q_02251 PE=3 SV=1; Elongation factor 1-alpha OS=Candida albicans P78042 GN=MGS_00808 PE=3 SV=1; Elongation factor 1-alpha OS=Can…			0	93.05	GKEKTHVNVVVIGHVDSGK	Protein Terminal Acetyl@N-term; Methyl(H)@6	cleaved M-G@N-term; missed K-E@2; missed K-T@4	0.0370005	2058.16	515.547	2058.12	515.538	4	11	1.1.1.1594.3	1	9.8284	330.861	9.8724
1	93.17	93.17	63.97	63.97	63.97	tr|C4YDJ3|C4YDJ3_CANAW; tr|A0A0A6Q741|A0A0A6Q741_CANAL; tr|A0A0A6M7H0|A0A0A6M7H0_CANAL; tr|A0A0A6M386|A0A0A6M386_CANAX; tr|A0A0A6LGT0|A0A0A6LGT0_CANAX; tr|A0A0A6L5Y0|A0A0A6L5Y0_CANAX; tr|A0A0A6L1C0|A0A0A6L1C0_CANAX; tr|A0A0A6KWM0|A0A0A6KWM0_CANAX; tr|A0A0A6K9D4|A0A0A6K9D4_CANAX; tr|A0A0A6K455|A0A0A6K455_CANAX; tr|A0A0A6JWU4|A0A0A6JWU4_CANAX; tr|A0A0A6J9A0|A0A0A6J9A0_CANAX; tr|A0A0A6J199|A0A0A6J19…	Elongation factor 1-alpha OS=Candida albicans (strain WO-1) GN=CAWG_00588 PE=3 SV=1; Elongation factor 1-alpha OS=Candida albicans (strain SC5314 / ATCC MYA-2876) GN=I503_00814 PE=3 SV=1; Elongation factor 1-alpha OS=Candida albicans (strain SC5314 / ATCC MYA-2876) GN=W5Q_02251 PE=3 SV=1; Elongation factor 1-alpha OS=Candida albicans P78042 GN=MGS_00808 PE=3 SV=1; Elongation factor 1-alpha OS=Can…			0	93.05	GKEKTHVNVVVIGHVDSGK	Protein Terminal Acetyl@N-term; Methyl(H)@6	cleaved M-G@N-term; missed K-E@2; missed K-T@4	0.0370005	2058.16	515.547	2058.12	515.538	4	10	1.1.1.1597.6	1	9.9474	330.861	9.8724
1	93.17	93.17	63.97	63.97	63.97	tr|C4YDJ3|C4YDJ3_CANAW; tr|A0A0A6Q741|A0A0A6Q741_CANAL; tr|A0A0A6M7H0|A0A0A6M7H0_CANAL; tr|A0A0A6M386|A0A0A6M386_CANAX; tr|A0A0A6LGT0|A0A0A6LGT0_CANAX; tr|A0A0A6L5Y0|A0A0A6L5Y0_CANAX; tr|A0A0A6L1C0|A0A0A6L1C0_CANAX; tr|A0A0A6KWM0|A0A0A6KWM0_CANAX; tr|A0A0A6K9D4|A0A0A6K9D4_CANAX; tr|A0A0A6K455|A0A0A6K455_CANAX; tr|A0A0A6JWU4|A0A0A6JWU4_CANAX; tr|A0A0A6J9A0|A0A0A6J9A0_CANAX; tr|A0A0A6J199|A0A0A6J19…	Elongation factor 1-alpha OS=Candida albicans (strain WO-1) GN=CAWG_00588 PE=3 SV=1; Elongation factor 1-alpha OS=Candida albicans (strain SC5314 / ATCC MYA-2876) GN=I503_00814 PE=3 SV=1; Elongation factor 1-alpha OS=Candida albicans (strain SC5314 / ATCC MYA-2876) GN=W5Q_02251 PE=3 SV=1; Elongation factor 1-alpha OS=Candida albicans P78042 GN=MGS_00808 PE=3 SV=1; Elongation factor 1-alpha OS=Can…			0	16.31	GKEKTHVNVVVIGHVDSGK	Protein Terminal Acetyl@N-term	cleaved M-G@N-term; missed K-E@2; missed K-T@4	0.0354522	2044.14	512.043	2044.11	512.034	4	7	1.1.1.1635.8	1	11.4498	170.549	11.4992
1	93.17	93.17	63.97	63.97	63.97	tr|C4YDJ3|C4YDJ3_CANAW; tr|A0A0A6Q741|A0A0A6Q741_CANAL; tr|A0A0A6M7H0|A0A0A6M7H0_CANAL; tr|A0A0A6M386|A0A0A6M386_CANAX; tr|A0A0A6LGT0|A0A0A6LGT0_CANAX; tr|A0A0A6L5Y0|A0A0A6L5Y0_CANAX; tr|A0A0A6L1C0|A0A0A6L1C0_CANAX; tr|A0A0A6KWM0|A0A0A6KWM0_CANAX; tr|A0A0A6K9D4|A0A0A6K9D4_CANAX; tr|A0A0A6K455|A0A0A6K455_CANAX; tr|A0A0A6JWU4|A0A0A6JWU4_CANAX; tr|A0A0A6J9A0|A0A0A6J9A0_CANAX; tr|A0A0A6J199|A0A0A6J19…	Elongation factor 1-alpha OS=Candida albicans (strain WO-1) GN=CAWG_00588 PE=3 SV=1; Elongation factor 1-alpha OS=Candida albicans (strain SC5314 / ATCC MYA-2876) GN=I503_00814 PE=3 SV=1; Elongation factor 1-alpha OS=Candida albicans (strain SC5314 / ATCC MYA-2876) GN=W5Q_02251 PE=3 SV=1; Elongation factor 1-alpha OS=Candida albicans P78042 GN=MGS_00808 PE=3 SV=1; Elongation factor 1-alpha OS=Can…			0	99	GKEKTHVNVVVIGHVDSGKSTTTGHLIYK	Trimethyl(K)@4	cleaved M-G@N-term; missed K-E@2; missed K-T@4; missed K-S@19	-0.00590098	3145.72	525.294	3145.72	525.295	6	21	1.1.1.1693.7	1	13.7526	1125.32	13.737
1	93.17	93.17	63.97	63.97	63.97	tr|C4YDJ3|C4YDJ3_CANAW; tr|A0A0A6Q741|A0A0A6Q741_CANAL; tr|A0A0A6M7H0|A0A0A6M7H0_CANAL; tr|A0A0A6M386|A0A0A6M386_CANAX; tr|A0A0A6LGT0|A0A0A6LGT0_CANAX; tr|A0A0A6L5Y0|A0A0A6L5Y0_CANAX; tr|A0A0A6L1C0|A0A0A6L1C0_CANAX; tr|A0A0A6KWM0|A0A0A6KWM0_CANAX; tr|A0A0A6K9D4|A0A0A6K9D4_CANAX; tr|A0A0A6K455|A0A0A6K455_CANAX; tr|A0A0A6JWU4|A0A0A6JWU4_CANAX; tr|A0A0A6J9A0|A0A0A6J9A0_CANAX; tr|A0A0A6J199|A0A0A6J19…	Elongation factor 1-alpha OS=Candida albicans (strain WO-1) GN=CAWG_00588 PE=3 SV=1; Elongation factor 1-alpha OS=Candida albicans (strain SC5314 / ATCC MYA-2876) GN=I503_00814 PE=3 SV=1; Elongation factor 1-alpha OS=Candida albicans (strain SC5314 / ATCC MYA-2876) GN=W5Q_02251 PE=3 SV=1; Elongation factor 1-alpha OS=Candida albicans P78042 GN=MGS_00808 PE=3 SV=1; Elongation factor 1-alpha OS=Can…			0	99	GKEKTHVNVVVIGHVDSGKSTTTGHLIYK	Trimethyl(K)@4	cleaved M-G@N-term; missed K-E@2; missed K-T@4; missed K-S@19	-0.00736579	3145.72	525.293	3145.72	525.295	6	18	1.1.1.1696.7	1	13.8724	1148.25	13.777
1	93.17	93.17	63.97	63.97	63.97	tr|C4YDJ3|C4YDJ3_CANAW; tr|A0A0A6Q741|A0A0A6Q741_CANAL; tr|A0A0A6M7H0|A0A0A6M7H0_CANAL; tr|A0A0A6M386|A0A0A6M386_CANAX; tr|A0A0A6LGT0|A0A0A6LGT0_CANAX; tr|A0A0A6L5Y0|A0A0A6L5Y0_CANAX; tr|A0A0A6L1C0|A0A0A6L1C0_CANAX; tr|A0A0A6KWM0|A0A0A6KWM0_CANAX; tr|A0A0A6K9D4|A0A0A6K9D4_CANAX; tr|A0A0A6K455|A0A0A6K455_CANAX; tr|A0A0A6JWU4|A0A0A6JWU4_CANAX; tr|A0A0A6J9A0|A0A0A6J9A0_CANAX; tr|A0A0A6J199|A0A0A6J19…	Elongation factor 1-alpha OS=Candida albicans (strain WO-1) GN=CAWG_00588 PE=3 SV=1; Elongation factor 1-alpha OS=Candida albicans (strain SC5314 / ATCC MYA-2876) GN=I503_00814 PE=3 SV=1; Elongation factor 1-alpha OS=Candida albicans (strain SC5314 / ATCC MYA-2876) GN=W5Q_02251 PE=3 SV=1; Elongation factor 1-alpha OS=Candida albicans P78042 GN=MGS_00808 PE=3 SV=1; Elongation factor 1-alpha OS=Can…			0	99	GKEKTHVNVVVIGHVDSGKSTTTGHLIYK	Trimethyl(K)@4	cleaved M-G@N-term; missed K-E@2; missed K-T@4; missed K-S@19	-0.00919679	3145.72	525.293	3145.72	525.295	6	14	1.1.1.1705.11	1	14.2395	1107.46	13.8169
1	93.17	93.17	63.97	63.97	63.97	tr|C4YDJ3|C4YDJ3_CANAW; tr|A0A0A6Q741|A0A0A6Q741_CANAL; tr|A0A0A6M7H0|A0A0A6M7H0_CANAL; tr|A0A0A6M386|A0A0A6M386_CANAX; tr|A0A0A6LGT0|A0A0A6LGT0_CANAX; tr|A0A0A6L5Y0|A0A0A6L5Y0_CANAX; tr|A0A0A6L1C0|A0A0A6L1C0_CANAX; tr|A0A0A6KWM0|A0A0A6KWM0_CANAX; tr|A0A0A6K9D4|A0A0A6K9D4_CANAX; tr|A0A0A6K455|A0A0A6K455_CANAX; tr|A0A0A6JWU4|A0A0A6JWU4_CANAX; tr|A0A0A6J9A0|A0A0A6J9A0_CANAX; tr|A0A0A6J199|A0A0A6J19…	Elongation factor 1-alpha OS=Candida albicans (strain WO-1) GN=CAWG_00588 PE=3 SV=1; Elongation factor 1-alpha OS=Candida albicans (strain SC5314 / ATCC MYA-2876) GN=I503_00814 PE=3 SV=1; Elongation factor 1-alpha OS=Candida albicans (strain SC5314 / ATCC MYA-2876) GN=W5Q_02251 PE=3 SV=1; Elongation factor 1-alpha OS=Candida albicans P78042 GN=MGS_00808 PE=3 SV=1; Elongation factor 1-alpha OS=Can…			0	99	GKEKTHVNVVVIGHVDSGKSTTTGHLIYK	Trimethyl(K)@4	cleaved M-G@N-term; missed K-E@2; missed K-T@4; missed K-S@19	-0.00103387	3145.72	630.152	3145.72	630.152	5	14	1.1.1.1708.17	1	14.3699	530.441	14.1373
1	93.17	93.17	63.97	63.97	63.97	tr|C4YDJ3|C4YDJ3_CANAW; tr|A0A0A6Q741|A0A0A6Q741_CANAL; tr|A0A0A6M7H0|A0A0A6M7H0_CANAL; tr|A0A0A6M386|A0A0A6M386_CANAX; tr|A0A0A6LGT0|A0A0A6LGT0_CANAX; tr|A0A0A6L5Y0|A0A0A6L5Y0_CANAX; tr|A0A0A6L1C0|A0A0A6L1C0_CANAX; tr|A0A0A6KWM0|A0A0A6KWM0_CANAX; tr|A0A0A6K9D4|A0A0A6K9D4_CANAX; tr|A0A0A6K455|A0A0A6K455_CANAX; tr|A0A0A6JWU4|A0A0A6JWU4_CANAX; tr|A0A0A6J9A0|A0A0A6J9A0_CANAX; tr|A0A0A6J199|A0A0A6J19…	Elongation factor 1-alpha OS=Candida albicans (strain WO-1) GN=CAWG_00588 PE=3 SV=1; Elongation factor 1-alpha OS=Candida albicans (strain SC5314 / ATCC MYA-2876) GN=I503_00814 PE=3 SV=1; Elongation factor 1-alpha OS=Candida albicans (strain SC5314 / ATCC MYA-2876) GN=W5Q_02251 PE=3 SV=1; Elongation factor 1-alpha OS=Candida albicans P78042 GN=MGS_00808 PE=3 SV=1; Elongation factor 1-alpha OS=Can…			0	99	GKEKTHVNVVVIGHVDSGKSTTTGHLIYK	Protein Terminal Acetyl@N-term	cleaved M-G@N-term; missed K-E@2; missed K-T@4; missed K-S@19	0.0315831	3145.72	525.294	3145.69	525.289	6	11	1.1.1.1708.9	1	14.3566	914.838	13.9369
1	93.17	93.17	63.97	63.97	63.97	tr|C4YDJ3|C4YDJ3_CANAW; tr|A0A0A6Q741|A0A0A6Q741_CANAL; tr|A0A0A6M7H0|A0A0A6M7H0_CANAL; tr|A0A0A6M386|A0A0A6M386_CANAX; tr|A0A0A6LGT0|A0A0A6LGT0_CANAX; tr|A0A0A6L5Y0|A0A0A6L5Y0_CANAX; tr|A0A0A6L1C0|A0A0A6L1C0_CANAX; tr|A0A0A6KWM0|A0A0A6KWM0_CANAX; tr|A0A0A6K9D4|A0A0A6K9D4_CANAX; tr|A0A0A6K455|A0A0A6K455_CANAX; tr|A0A0A6JWU4|A0A0A6JWU4_CANAX; tr|A0A0A6J9A0|A0A0A6J9A0_CANAX; tr|A0A0A6J199|A0A0A6J19…	Elongation factor 1-alpha OS=Candida albicans (strain WO-1) GN=CAWG_00588 PE=3 SV=1; Elongation factor 1-alpha OS=Candida albicans (strain SC5314 / ATCC MYA-2876) GN=I503_00814 PE=3 SV=1; Elongation factor 1-alpha OS=Candida albicans (strain SC5314 / ATCC MYA-2876) GN=W5Q_02251 PE=3 SV=1; Elongation factor 1-alpha OS=Candida albicans P78042 GN=MGS_00808 PE=3 SV=1; Elongation factor 1-alpha OS=Can…			0	84.74	GKEKTHVNVVVIGHVDSGKSTTTGHLIYK	Protein Terminal Acetyl@N-term	cleaved M-G@N-term; missed K-E@2; missed K-T@4; missed K-S@19	0.0308507	3145.72	525.294	3145.69	525.289	6	9	1.1.1.1702.9	1	14.1162	1158.03	13.6969
1	93.17	93.17	63.97	63.97	63.97	tr|C4YDJ3|C4YDJ3_CANAW; tr|A0A0A6Q741|A0A0A6Q741_CANAL; tr|A0A0A6M7H0|A0A0A6M7H0_CANAL; tr|A0A0A6M386|A0A0A6M386_CANAX; tr|A0A0A6LGT0|A0A0A6LGT0_CANAX; tr|A0A0A6L5Y0|A0A0A6L5Y0_CANAX; tr|A0A0A6L1C0|A0A0A6L1C0_CANAX; tr|A0A0A6KWM0|A0A0A6KWM0_CANAX; tr|A0A0A6K9D4|A0A0A6K9D4_CANAX; tr|A0A0A6K455|A0A0A6K455_CANAX; tr|A0A0A6JWU4|A0A0A6JWU4_CANAX; tr|A0A0A6J9A0|A0A0A6J9A0_CANAX; tr|A0A0A6J199|A0A0A6J19…	Elongation factor 1-alpha OS=Candida albicans (strain WO-1) GN=CAWG_00588 PE=3 SV=1; Elongation factor 1-alpha OS=Candida albicans (strain SC5314 / ATCC MYA-2876) GN=I503_00814 PE=3 SV=1; Elongation factor 1-alpha OS=Candida albicans (strain SC5314 / ATCC MYA-2876) GN=W5Q_02251 PE=3 SV=1; Elongation factor 1-alpha OS=Candida albicans P78042 GN=MGS_00808 PE=3 SV=1; Elongation factor 1-alpha OS=Can…			0	80.25	GKEKTHVNVVVIGHVDSGKSTTTGHLIYK	Protein Terminal Acetyl@N-term	cleaved M-G@N-term; missed K-E@2; missed K-T@4; missed K-S@19	0.026807	3145.72	630.15	3145.69	630.145	5	9	1.1.1.1698.15	1	13.9658	857.834	13.777
1	93.17	93.17	63.97	63.97	63.97	tr|C4YDJ3|C4YDJ3_CANAW; tr|A0A0A6Q741|A0A0A6Q741_CANAL; tr|A0A0A6M7H0|A0A0A6M7H0_CANAL; tr|A0A0A6M386|A0A0A6M386_CANAX; tr|A0A0A6LGT0|A0A0A6LGT0_CANAX; tr|A0A0A6L5Y0|A0A0A6L5Y0_CANAX; tr|A0A0A6L1C0|A0A0A6L1C0_CANAX; tr|A0A0A6KWM0|A0A0A6KWM0_CANAX; tr|A0A0A6K9D4|A0A0A6K9D4_CANAX; tr|A0A0A6K455|A0A0A6K455_CANAX; tr|A0A0A6JWU4|A0A0A6JWU4_CANAX; tr|A0A0A6J9A0|A0A0A6J9A0_CANAX; tr|A0A0A6J199|A0A0A6J19…	Elongation factor 1-alpha OS=Candida albicans (strain WO-1) GN=CAWG_00588 PE=3 SV=1; Elongation factor 1-alpha OS=Candida albicans (strain SC5314 / ATCC MYA-2876) GN=I503_00814 PE=3 SV=1; Elongation factor 1-alpha OS=Candida albicans (strain SC5314 / ATCC MYA-2876) GN=W5Q_02251 PE=3 SV=1; Elongation factor 1-alpha OS=Candida albicans P78042 GN=MGS_00808 PE=3 SV=1; Elongation factor 1-alpha OS=Can…			0	56.67	GKEKTHVNVVVIGHVDSGKSTTTGHLIYK	Protein Terminal Acetyl@N-term; Delta:H(4)C(2)(H)@6	cleaved M-G@N-term; missed K-E@2; missed K-T@4; missed K-S@19	0.0340633	3173.75	529.966	3173.72	529.961	6	10	1.1.1.1697.6	1	13.9108	887.8	13.8969
1	93.17	93.17	63.97	63.97	63.97	tr|C4YDJ3|C4YDJ3_CANAW; tr|A0A0A6Q741|A0A0A6Q741_CANAL; tr|A0A0A6M7H0|A0A0A6M7H0_CANAL; tr|A0A0A6M386|A0A0A6M386_CANAX; tr|A0A0A6LGT0|A0A0A6LGT0_CANAX; tr|A0A0A6L5Y0|A0A0A6L5Y0_CANAX; tr|A0A0A6L1C0|A0A0A6L1C0_CANAX; tr|A0A0A6KWM0|A0A0A6KWM0_CANAX; tr|A0A0A6K9D4|A0A0A6K9D4_CANAX; tr|A0A0A6K455|A0A0A6K455_CANAX; tr|A0A0A6JWU4|A0A0A6JWU4_CANAX; tr|A0A0A6J9A0|A0A0A6J9A0_CANAX; tr|A0A0A6J199|A0A0A6J19…	Elongation factor 1-alpha OS=Candida albicans (strain WO-1) GN=CAWG_00588 PE=3 SV=1; Elongation factor 1-alpha OS=Candida albicans (strain SC5314 / ATCC MYA-2876) GN=I503_00814 PE=3 SV=1; Elongation factor 1-alpha OS=Candida albicans (strain SC5314 / ATCC MYA-2876) GN=W5Q_02251 PE=3 SV=1; Elongation factor 1-alpha OS=Candida albicans P78042 GN=MGS_00808 PE=3 SV=1; Elongation factor 1-alpha OS=Can…			0	50.4	GKEKTHVNVVVIGHVDSGKSTTTGHLIYK	Protein Terminal Acetyl@N-term	cleaved M-G@N-term; missed K-E@2; missed K-T@4; missed K-S@19	0.0304845	3145.72	525.294	3145.69	525.289	6	8	1.1.1.1690.8	1	13.6341	1125.32	13.737
1	93.17	93.17	63.97	63.97	63.97	tr|C4YDJ3|C4YDJ3_CANAW; tr|A0A0A6Q741|A0A0A6Q741_CANAL; tr|A0A0A6M7H0|A0A0A6M7H0_CANAL; tr|A0A0A6M386|A0A0A6M386_CANAX; tr|A0A0A6LGT0|A0A0A6LGT0_CANAX; tr|A0A0A6L5Y0|A0A0A6L5Y0_CANAX; tr|A0A0A6L1C0|A0A0A6L1C0_CANAX; tr|A0A0A6KWM0|A0A0A6KWM0_CANAX; tr|A0A0A6K9D4|A0A0A6K9D4_CANAX; tr|A0A0A6K455|A0A0A6K455_CANAX; tr|A0A0A6JWU4|A0A0A6JWU4_CANAX; tr|A0A0A6J9A0|A0A0A6J9A0_CANAX; tr|A0A0A6J199|A0A0A6J19…	Elongation factor 1-alpha OS=Candida albicans (strain WO-1) GN=CAWG_00588 PE=3 SV=1; Elongation factor 1-alpha OS=Candida albicans (strain SC5314 / ATCC MYA-2876) GN=I503_00814 PE=3 SV=1; Elongation factor 1-alpha OS=Candida albicans (strain SC5314 / ATCC MYA-2876) GN=W5Q_02251 PE=3 SV=1; Elongation factor 1-alpha OS=Candida albicans P78042 GN=MGS_00808 PE=3 SV=1; Elongation factor 1-alpha OS=Can…			0	50.4	GKEKTHVNVVVIGHVDSGKSTTTGHLIYK	Trimethyl(K)@4	cleaved M-G@N-term; missed K-E@2; missed K-T@4; missed K-S@19	-0.00957855	3145.72	630.15	3145.72	630.152	5	10	1.1.1.1701.12	1	14.0812	857.834	13.777
1	93.17	93.17	63.97	63.97	63.97	tr|C4YDJ3|C4YDJ3_CANAW; tr|A0A0A6Q741|A0A0A6Q741_CANAL; tr|A0A0A6M7H0|A0A0A6M7H0_CANAL; tr|A0A0A6M386|A0A0A6M386_CANAX; tr|A0A0A6LGT0|A0A0A6LGT0_CANAX; tr|A0A0A6L5Y0|A0A0A6L5Y0_CANAX; tr|A0A0A6L1C0|A0A0A6L1C0_CANAX; tr|A0A0A6KWM0|A0A0A6KWM0_CANAX; tr|A0A0A6K9D4|A0A0A6K9D4_CANAX; tr|A0A0A6K455|A0A0A6K455_CANAX; tr|A0A0A6JWU4|A0A0A6JWU4_CANAX; tr|A0A0A6J9A0|A0A0A6J9A0_CANAX; tr|A0A0A6J199|A0A0A6J19…	Elongation factor 1-alpha OS=Candida albicans (strain WO-1) GN=CAWG_00588 PE=3 SV=1; Elongation factor 1-alpha OS=Candida albicans (strain SC5314 / ATCC MYA-2876) GN=I503_00814 PE=3 SV=1; Elongation factor 1-alpha OS=Candida albicans (strain SC5314 / ATCC MYA-2876) GN=W5Q_02251 PE=3 SV=1; Elongation factor 1-alpha OS=Candida albicans P78042 GN=MGS_00808 PE=3 SV=1; Elongation factor 1-alpha OS=Can…			0	23.02	GKEKTHVNVVVIGHVDSGKSTTTGHLIYK	Protein Terminal Acetyl@N-term	cleaved M-G@N-term; missed K-E@2; missed K-T@4; missed K-S@19	0.0315831	3145.72	525.294	3145.69	525.289	6	7	1.1.1.1735.10	1	15.4414	371.934	15.4205
1	93.17	93.17	63.97	63.97	63.97	tr|C4YDJ3|C4YDJ3_CANAW; tr|A0A0A6Q741|A0A0A6Q741_CANAL; tr|A0A0A6M7H0|A0A0A6M7H0_CANAL; tr|A0A0A6M386|A0A0A6M386_CANAX; tr|A0A0A6LGT0|A0A0A6LGT0_CANAX; tr|A0A0A6L5Y0|A0A0A6L5Y0_CANAX; tr|A0A0A6L1C0|A0A0A6L1C0_CANAX; tr|A0A0A6KWM0|A0A0A6KWM0_CANAX; tr|A0A0A6K9D4|A0A0A6K9D4_CANAX; tr|A0A0A6K455|A0A0A6K455_CANAX; tr|A0A0A6JWU4|A0A0A6JWU4_CANAX; tr|A0A0A6J9A0|A0A0A6J9A0_CANAX; tr|A0A0A6J199|A0A0A6J19…	Elongation factor 1-alpha OS=Candida albicans (strain WO-1) GN=CAWG_00588 PE=3 SV=1; Elongation factor 1-alpha OS=Candida albicans (strain SC5314 / ATCC MYA-2876) GN=I503_00814 PE=3 SV=1; Elongation factor 1-alpha OS=Candida albicans (strain SC5314 / ATCC MYA-2876) GN=W5Q_02251 PE=3 SV=1; Elongation factor 1-alpha OS=Candida albicans P78042 GN=MGS_00808 PE=3 SV=1; Elongation factor 1-alpha OS=Can…			0	16.31	GKEKTHVNVVVIGHVDSGKSTTTGHLIYK	Protein Terminal Acetyl@N-term	cleaved M-G@N-term; missed K-E@2; missed K-T@4; missed K-S@19	0.0258548	3145.71	450.395	3145.69	450.391	7	7	1.1.1.1724.4	1	14.9896	423.278	14.9389
1	93.17	93.17	63.97	63.97	63.97	tr|C4YDJ3|C4YDJ3_CANAW; tr|A0A0A6Q741|A0A0A6Q741_CANAL; tr|A0A0A6M7H0|A0A0A6M7H0_CANAL; tr|A0A0A6M386|A0A0A6M386_CANAX; tr|A0A0A6LGT0|A0A0A6LGT0_CANAX; tr|A0A0A6L5Y0|A0A0A6L5Y0_CANAX; tr|A0A0A6L1C0|A0A0A6L1C0_CANAX; tr|A0A0A6KWM0|A0A0A6KWM0_CANAX; tr|A0A0A6K9D4|A0A0A6K9D4_CANAX; tr|A0A0A6K455|A0A0A6K455_CANAX; tr|A0A0A6JWU4|A0A0A6JWU4_CANAX; tr|A0A0A6J9A0|A0A0A6J9A0_CANAX; tr|A0A0A6J199|A0A0A6J19…	Elongation factor 1-alpha OS=Candida albicans (strain WO-1) GN=CAWG_00588 PE=3 SV=1; Elongation factor 1-alpha OS=Candida albicans (strain SC5314 / ATCC MYA-2876) GN=I503_00814 PE=3 SV=1; Elongation factor 1-alpha OS=Candida albicans (strain SC5314 / ATCC MYA-2876) GN=W5Q_02251 PE=3 SV=1; Elongation factor 1-alpha OS=Candida albicans P78042 GN=MGS_00808 PE=3 SV=1; Elongation factor 1-alpha OS=Can…			0	99	HEQLAEGVPGDNVGFNVKNVSVKEIR	Trimethyl(K)@18	cleaved H-H@N-term; missed K-N@18; missed K-E@23	-0.00161778	2876.51	720.135	2876.51	720.136	4	18	1.1.1.1902.19	1	22.1381	1927.12	22.1025
1	93.17	93.17	63.97	63.97	63.97	tr|C4YDJ3|C4YDJ3_CANAW; tr|A0A0A6Q741|A0A0A6Q741_CANAL; tr|A0A0A6M7H0|A0A0A6M7H0_CANAL; tr|A0A0A6M386|A0A0A6M386_CANAX; tr|A0A0A6LGT0|A0A0A6LGT0_CANAX; tr|A0A0A6L5Y0|A0A0A6L5Y0_CANAX; tr|A0A0A6L1C0|A0A0A6L1C0_CANAX; tr|A0A0A6KWM0|A0A0A6KWM0_CANAX; tr|A0A0A6K9D4|A0A0A6K9D4_CANAX; tr|A0A0A6K455|A0A0A6K455_CANAX; tr|A0A0A6JWU4|A0A0A6JWU4_CANAX; tr|A0A0A6J9A0|A0A0A6J9A0_CANAX; tr|A0A0A6J199|A0A0A6J19…	Elongation factor 1-alpha OS=Candida albicans (strain WO-1) GN=CAWG_00588 PE=3 SV=1; Elongation factor 1-alpha OS=Candida albicans (strain SC5314 / ATCC MYA-2876) GN=I503_00814 PE=3 SV=1; Elongation factor 1-alpha OS=Candida albicans (strain SC5314 / ATCC MYA-2876) GN=W5Q_02251 PE=3 SV=1; Elongation factor 1-alpha OS=Candida albicans P78042 GN=MGS_00808 PE=3 SV=1; Elongation factor 1-alpha OS=Can…			0	99	HEQLAEGVPGDNVGFNVKNVSVKEIR	Trimethyl(K)@23	cleaved H-H@N-term; missed K-N@18; missed K-E@23	-0.00161778	2876.51	720.135	2876.51	720.136	4	17	1.1.1.1905.18	1	22.2553	1927.12	22.1025
1	93.17	93.17	63.97	63.97	63.97	tr|C4YDJ3|C4YDJ3_CANAW; tr|A0A0A6Q741|A0A0A6Q741_CANAL; tr|A0A0A6M7H0|A0A0A6M7H0_CANAL; tr|A0A0A6M386|A0A0A6M386_CANAX; tr|A0A0A6LGT0|A0A0A6LGT0_CANAX; tr|A0A0A6L5Y0|A0A0A6L5Y0_CANAX; tr|A0A0A6L1C0|A0A0A6L1C0_CANAX; tr|A0A0A6KWM0|A0A0A6KWM0_CANAX; tr|A0A0A6K9D4|A0A0A6K9D4_CANAX; tr|A0A0A6K455|A0A0A6K455_CANAX; tr|A0A0A6JWU4|A0A0A6JWU4_CANAX; tr|A0A0A6J9A0|A0A0A6J9A0_CANAX; tr|A0A0A6J199|A0A0A6J19…	Elongation factor 1-alpha OS=Candida albicans (strain WO-1) GN=CAWG_00588 PE=3 SV=1; Elongation factor 1-alpha OS=Candida albicans (strain SC5314 / ATCC MYA-2876) GN=I503_00814 PE=3 SV=1; Elongation factor 1-alpha OS=Candida albicans (strain SC5314 / ATCC MYA-2876) GN=W5Q_02251 PE=3 SV=1; Elongation factor 1-alpha OS=Candida albicans P78042 GN=MGS_00808 PE=3 SV=1; Elongation factor 1-alpha OS=Can…			0	99	IDRRTGKKLEENPKFVK		missed R-R@3; missed R-T@4; missed K-K@7; missed K-L@8; missed K-F@14	-0.00649119	2057.17	412.441	2057.17	412.442	5	19	1.1.1.1515.2	1	8.0184	881.331	8.1016
1	93.17	93.17	63.97	63.97	63.97	tr|C4YDJ3|C4YDJ3_CANAW; tr|A0A0A6Q741|A0A0A6Q741_CANAL; tr|A0A0A6M7H0|A0A0A6M7H0_CANAL; tr|A0A0A6M386|A0A0A6M386_CANAX; tr|A0A0A6LGT0|A0A0A6LGT0_CANAX; tr|A0A0A6L5Y0|A0A0A6L5Y0_CANAX; tr|A0A0A6L1C0|A0A0A6L1C0_CANAX; tr|A0A0A6KWM0|A0A0A6KWM0_CANAX; tr|A0A0A6K9D4|A0A0A6K9D4_CANAX; tr|A0A0A6K455|A0A0A6K455_CANAX; tr|A0A0A6JWU4|A0A0A6JWU4_CANAX; tr|A0A0A6J9A0|A0A0A6J9A0_CANAX; tr|A0A0A6J199|A0A0A6J19…	Elongation factor 1-alpha OS=Candida albicans (strain WO-1) GN=CAWG_00588 PE=3 SV=1; Elongation factor 1-alpha OS=Candida albicans (strain SC5314 / ATCC MYA-2876) GN=I503_00814 PE=3 SV=1; Elongation factor 1-alpha OS=Candida albicans (strain SC5314 / ATCC MYA-2876) GN=W5Q_02251 PE=3 SV=1; Elongation factor 1-alpha OS=Candida albicans P78042 GN=MGS_00808 PE=3 SV=1; Elongation factor 1-alpha OS=Can…			0	99	IDRRTGKKLEENPKFVK		missed R-R@3; missed R-T@4; missed K-K@7; missed K-L@8; missed K-F@14	0.000282267	2057.18	515.301	2057.17	515.301	4	20	1.1.1.1526.2	1	8.1761	404.366	8.1414
1	93.17	93.17	63.97	63.97	63.97	tr|C4YDJ3|C4YDJ3_CANAW; tr|A0A0A6Q741|A0A0A6Q741_CANAL; tr|A0A0A6M7H0|A0A0A6M7H0_CANAL; tr|A0A0A6M386|A0A0A6M386_CANAX; tr|A0A0A6LGT0|A0A0A6LGT0_CANAX; tr|A0A0A6L5Y0|A0A0A6L5Y0_CANAX; tr|A0A0A6L1C0|A0A0A6L1C0_CANAX; tr|A0A0A6KWM0|A0A0A6KWM0_CANAX; tr|A0A0A6K9D4|A0A0A6K9D4_CANAX; tr|A0A0A6K455|A0A0A6K455_CANAX; tr|A0A0A6JWU4|A0A0A6JWU4_CANAX; tr|A0A0A6J9A0|A0A0A6J9A0_CANAX; tr|A0A0A6J199|A0A0A6J19…	Elongation factor 1-alpha OS=Candida albicans (strain WO-1) GN=CAWG_00588 PE=3 SV=1; Elongation factor 1-alpha OS=Candida albicans (strain SC5314 / ATCC MYA-2876) GN=I503_00814 PE=3 SV=1; Elongation factor 1-alpha OS=Candida albicans (strain SC5314 / ATCC MYA-2876) GN=W5Q_02251 PE=3 SV=1; Elongation factor 1-alpha OS=Candida albicans P78042 GN=MGS_00808 PE=3 SV=1; Elongation factor 1-alpha OS=Can…			0	99	IDRRTGKKLEENPKFVK		missed R-R@3; missed R-T@4; missed K-K@7; missed K-L@8; missed K-F@14	0.000282267	2057.18	515.301	2057.17	515.301	4	18	1.1.1.1527.3	1	8.2154	404.366	8.1414
1	93.17	93.17	63.97	63.97	63.97	tr|C4YDJ3|C4YDJ3_CANAW; tr|A0A0A6Q741|A0A0A6Q741_CANAL; tr|A0A0A6M7H0|A0A0A6M7H0_CANAL; tr|A0A0A6M386|A0A0A6M386_CANAX; tr|A0A0A6LGT0|A0A0A6LGT0_CANAX; tr|A0A0A6L5Y0|A0A0A6L5Y0_CANAX; tr|A0A0A6L1C0|A0A0A6L1C0_CANAX; tr|A0A0A6KWM0|A0A0A6KWM0_CANAX; tr|A0A0A6K9D4|A0A0A6K9D4_CANAX; tr|A0A0A6K455|A0A0A6K455_CANAX; tr|A0A0A6JWU4|A0A0A6JWU4_CANAX; tr|A0A0A6J9A0|A0A0A6J9A0_CANAX; tr|A0A0A6J199|A0A0A6J19…	Elongation factor 1-alpha OS=Candida albicans (strain WO-1) GN=CAWG_00588 PE=3 SV=1; Elongation factor 1-alpha OS=Candida albicans (strain SC5314 / ATCC MYA-2876) GN=I503_00814 PE=3 SV=1; Elongation factor 1-alpha OS=Candida albicans (strain SC5314 / ATCC MYA-2876) GN=W5Q_02251 PE=3 SV=1; Elongation factor 1-alpha OS=Candida albicans P78042 GN=MGS_00808 PE=3 SV=1; Elongation factor 1-alpha OS=Can…			0	99	IDRRTGKKLEENPKFVK		missed R-R@3; missed R-T@4; missed K-K@7; missed K-L@8; missed K-F@14	-0.00649119	2057.17	412.441	2057.17	412.442	5	19	1.1.1.1528.2	1	8.2546	927.095	8.1414
1	93.17	93.17	63.97	63.97	63.97	tr|C4YDJ3|C4YDJ3_CANAW; tr|A0A0A6Q741|A0A0A6Q741_CANAL; tr|A0A0A6M7H0|A0A0A6M7H0_CANAL; tr|A0A0A6M386|A0A0A6M386_CANAX; tr|A0A0A6LGT0|A0A0A6LGT0_CANAX; tr|A0A0A6L5Y0|A0A0A6L5Y0_CANAX; tr|A0A0A6L1C0|A0A0A6L1C0_CANAX; tr|A0A0A6KWM0|A0A0A6KWM0_CANAX; tr|A0A0A6K9D4|A0A0A6K9D4_CANAX; tr|A0A0A6K455|A0A0A6K455_CANAX; tr|A0A0A6JWU4|A0A0A6JWU4_CANAX; tr|A0A0A6J9A0|A0A0A6J9A0_CANAX; tr|A0A0A6J199|A0A0A6J19…	Elongation factor 1-alpha OS=Candida albicans (strain WO-1) GN=CAWG_00588 PE=3 SV=1; Elongation factor 1-alpha OS=Candida albicans (strain SC5314 / ATCC MYA-2876) GN=I503_00814 PE=3 SV=1; Elongation factor 1-alpha OS=Candida albicans (strain SC5314 / ATCC MYA-2876) GN=W5Q_02251 PE=3 SV=1; Elongation factor 1-alpha OS=Candida albicans P78042 GN=MGS_00808 PE=3 SV=1; Elongation factor 1-alpha OS=Can…			0	99	IDRRTGKKLEENPKFVK		missed R-R@3; missed R-T@4; missed K-K@7; missed K-L@8; missed K-F@14	-0.00649119	2057.17	412.441	2057.17	412.442	5	19	1.1.1.1538.2	1	8.476	723.326	8.2197
1	93.17	93.17	63.97	63.97	63.97	tr|C4YDJ3|C4YDJ3_CANAW; tr|A0A0A6Q741|A0A0A6Q741_CANAL; tr|A0A0A6M7H0|A0A0A6M7H0_CANAL; tr|A0A0A6M386|A0A0A6M386_CANAX; tr|A0A0A6LGT0|A0A0A6LGT0_CANAX; tr|A0A0A6L5Y0|A0A0A6L5Y0_CANAX; tr|A0A0A6L1C0|A0A0A6L1C0_CANAX; tr|A0A0A6KWM0|A0A0A6KWM0_CANAX; tr|A0A0A6K9D4|A0A0A6K9D4_CANAX; tr|A0A0A6K455|A0A0A6K455_CANAX; tr|A0A0A6JWU4|A0A0A6JWU4_CANAX; tr|A0A0A6J9A0|A0A0A6J9A0_CANAX; tr|A0A0A6J199|A0A0A6J19…	Elongation factor 1-alpha OS=Candida albicans (strain WO-1) GN=CAWG_00588 PE=3 SV=1; Elongation factor 1-alpha OS=Candida albicans (strain SC5314 / ATCC MYA-2876) GN=I503_00814 PE=3 SV=1; Elongation factor 1-alpha OS=Candida albicans (strain SC5314 / ATCC MYA-2876) GN=W5Q_02251 PE=3 SV=1; Elongation factor 1-alpha OS=Candida albicans P78042 GN=MGS_00808 PE=3 SV=1; Elongation factor 1-alpha OS=Can…			0	99	IDRRTGKKLEENPKFVKSGDAAIVK		missed R-R@3; missed R-T@4; missed K-K@7; missed K-L@8; missed K-F@14; missed K-S@17	-0.00161613	2798.57	560.722	2798.58	560.723	5	24	1.1.1.1616.4	1	10.6884	719.481	10.7807
1	93.17	93.17	63.97	63.97	63.97	tr|C4YDJ3|C4YDJ3_CANAW; tr|A0A0A6Q741|A0A0A6Q741_CANAL; tr|A0A0A6M7H0|A0A0A6M7H0_CANAL; tr|A0A0A6M386|A0A0A6M386_CANAX; tr|A0A0A6LGT0|A0A0A6LGT0_CANAX; tr|A0A0A6L5Y0|A0A0A6L5Y0_CANAX; tr|A0A0A6L1C0|A0A0A6L1C0_CANAX; tr|A0A0A6KWM0|A0A0A6KWM0_CANAX; tr|A0A0A6K9D4|A0A0A6K9D4_CANAX; tr|A0A0A6K455|A0A0A6K455_CANAX; tr|A0A0A6JWU4|A0A0A6JWU4_CANAX; tr|A0A0A6J9A0|A0A0A6J9A0_CANAX; tr|A0A0A6J199|A0A0A6J19…	Elongation factor 1-alpha OS=Candida albicans (strain WO-1) GN=CAWG_00588 PE=3 SV=1; Elongation factor 1-alpha OS=Candida albicans (strain SC5314 / ATCC MYA-2876) GN=I503_00814 PE=3 SV=1; Elongation factor 1-alpha OS=Candida albicans (strain SC5314 / ATCC MYA-2876) GN=W5Q_02251 PE=3 SV=1; Elongation factor 1-alpha OS=Candida albicans P78042 GN=MGS_00808 PE=3 SV=1; Elongation factor 1-alpha OS=Can…			0	99	IDRRTGKKLEENPKFVKSGDAAIVK		missed R-R@3; missed R-T@4; missed K-K@7; missed K-L@8; missed K-F@14; missed K-S@17	-0.00619033	2798.57	467.436	2798.58	467.437	6	23	1.1.1.1618.5	1	10.7696	984.024	10.8205
1	93.17	93.17	63.97	63.97	63.97	tr|C4YDJ3|C4YDJ3_CANAW; tr|A0A0A6Q741|A0A0A6Q741_CANAL; tr|A0A0A6M7H0|A0A0A6M7H0_CANAL; tr|A0A0A6M386|A0A0A6M386_CANAX; tr|A0A0A6LGT0|A0A0A6LGT0_CANAX; tr|A0A0A6L5Y0|A0A0A6L5Y0_CANAX; tr|A0A0A6L1C0|A0A0A6L1C0_CANAX; tr|A0A0A6KWM0|A0A0A6KWM0_CANAX; tr|A0A0A6K9D4|A0A0A6K9D4_CANAX; tr|A0A0A6K455|A0A0A6K455_CANAX; tr|A0A0A6JWU4|A0A0A6JWU4_CANAX; tr|A0A0A6J9A0|A0A0A6J9A0_CANAX; tr|A0A0A6J199|A0A0A6J19…	Elongation factor 1-alpha OS=Candida albicans (strain WO-1) GN=CAWG_00588 PE=3 SV=1; Elongation factor 1-alpha OS=Candida albicans (strain SC5314 / ATCC MYA-2876) GN=I503_00814 PE=3 SV=1; Elongation factor 1-alpha OS=Candida albicans (strain SC5314 / ATCC MYA-2876) GN=W5Q_02251 PE=3 SV=1; Elongation factor 1-alpha OS=Candida albicans P78042 GN=MGS_00808 PE=3 SV=1; Elongation factor 1-alpha OS=Can…			0	99	IDRRTGKKLEENPKFVKSGDAAIVK		missed R-R@3; missed R-T@4; missed K-K@7; missed K-L@8; missed K-F@14; missed K-S@17	-0.00161613	2798.57	560.722	2798.58	560.723	5	25	1.1.1.1619.3	1	10.8161	719.481	10.7807
1	93.17	93.17	63.97	63.97	63.97	tr|C4YDJ3|C4YDJ3_CANAW; tr|A0A0A6Q741|A0A0A6Q741_CANAL; tr|A0A0A6M7H0|A0A0A6M7H0_CANAL; tr|A0A0A6M386|A0A0A6M386_CANAX; tr|A0A0A6LGT0|A0A0A6LGT0_CANAX; tr|A0A0A6L5Y0|A0A0A6L5Y0_CANAX; tr|A0A0A6L1C0|A0A0A6L1C0_CANAX; tr|A0A0A6KWM0|A0A0A6KWM0_CANAX; tr|A0A0A6K9D4|A0A0A6K9D4_CANAX; tr|A0A0A6K455|A0A0A6K455_CANAX; tr|A0A0A6JWU4|A0A0A6JWU4_CANAX; tr|A0A0A6J9A0|A0A0A6J9A0_CANAX; tr|A0A0A6J199|A0A0A6J19…	Elongation factor 1-alpha OS=Candida albicans (strain WO-1) GN=CAWG_00588 PE=3 SV=1; Elongation factor 1-alpha OS=Candida albicans (strain SC5314 / ATCC MYA-2876) GN=I503_00814 PE=3 SV=1; Elongation factor 1-alpha OS=Candida albicans (strain SC5314 / ATCC MYA-2876) GN=W5Q_02251 PE=3 SV=1; Elongation factor 1-alpha OS=Candida albicans P78042 GN=MGS_00808 PE=3 SV=1; Elongation factor 1-alpha OS=Can…			0	99	IDRRTGKKLEENPKFVKSGDAAIVK		missed R-R@3; missed R-T@4; missed K-K@7; missed K-L@8; missed K-F@14; missed K-S@17	-0.00619033	2798.57	467.436	2798.58	467.437	6	21	1.1.1.1621.4	1	10.8826	984.024	10.8205
1	93.17	93.17	63.97	63.97	63.97	tr|C4YDJ3|C4YDJ3_CANAW; tr|A0A0A6Q741|A0A0A6Q741_CANAL; tr|A0A0A6M7H0|A0A0A6M7H0_CANAL; tr|A0A0A6M386|A0A0A6M386_CANAX; tr|A0A0A6LGT0|A0A0A6LGT0_CANAX; tr|A0A0A6L5Y0|A0A0A6L5Y0_CANAX; tr|A0A0A6L1C0|A0A0A6L1C0_CANAX; tr|A0A0A6KWM0|A0A0A6KWM0_CANAX; tr|A0A0A6K9D4|A0A0A6K9D4_CANAX; tr|A0A0A6K455|A0A0A6K455_CANAX; tr|A0A0A6JWU4|A0A0A6JWU4_CANAX; tr|A0A0A6J9A0|A0A0A6J9A0_CANAX; tr|A0A0A6J199|A0A0A6J19…	Elongation factor 1-alpha OS=Candida albicans (strain WO-1) GN=CAWG_00588 PE=3 SV=1; Elongation factor 1-alpha OS=Candida albicans (strain SC5314 / ATCC MYA-2876) GN=I503_00814 PE=3 SV=1; Elongation factor 1-alpha OS=Candida albicans (strain SC5314 / ATCC MYA-2876) GN=W5Q_02251 PE=3 SV=1; Elongation factor 1-alpha OS=Candida albicans P78042 GN=MGS_00808 PE=3 SV=1; Elongation factor 1-alpha OS=Can…			0	99	IDRRTGKKLEENPKFVKSGDAAIVK		missed R-R@3; missed R-T@4; missed K-K@7; missed K-L@8; missed K-F@14; missed K-S@17	0.00293033	2798.58	700.652	2798.58	700.651	4	14	1.1.1.1621.6	1	10.8959	330.556	10.7807
1	93.17	93.17	63.97	63.97	63.97	tr|C4YDJ3|C4YDJ3_CANAW; tr|A0A0A6Q741|A0A0A6Q741_CANAL; tr|A0A0A6M7H0|A0A0A6M7H0_CANAL; tr|A0A0A6M386|A0A0A6M386_CANAX; tr|A0A0A6LGT0|A0A0A6LGT0_CANAX; tr|A0A0A6L5Y0|A0A0A6L5Y0_CANAX; tr|A0A0A6L1C0|A0A0A6L1C0_CANAX; tr|A0A0A6KWM0|A0A0A6KWM0_CANAX; tr|A0A0A6K9D4|A0A0A6K9D4_CANAX; tr|A0A0A6K455|A0A0A6K455_CANAX; tr|A0A0A6JWU4|A0A0A6JWU4_CANAX; tr|A0A0A6J9A0|A0A0A6J9A0_CANAX; tr|A0A0A6J199|A0A0A6J19…	Elongation factor 1-alpha OS=Candida albicans (strain WO-1) GN=CAWG_00588 PE=3 SV=1; Elongation factor 1-alpha OS=Candida albicans (strain SC5314 / ATCC MYA-2876) GN=I503_00814 PE=3 SV=1; Elongation factor 1-alpha OS=Candida albicans (strain SC5314 / ATCC MYA-2876) GN=W5Q_02251 PE=3 SV=1; Elongation factor 1-alpha OS=Candida albicans P78042 GN=MGS_00808 PE=3 SV=1; Elongation factor 1-alpha OS=Can…			0	99	IDRRTGKKLEENPKFVKSGDAAIVK		missed R-R@3; missed R-T@4; missed K-K@7; missed K-L@8; missed K-F@14; missed K-S@17	-0.00161613	2798.57	560.722	2798.58	560.723	5	16	1.1.1.1622.4	1	10.9225	719.481	10.7807
1	93.17	93.17	63.97	63.97	63.97	tr|C4YDJ3|C4YDJ3_CANAW; tr|A0A0A6Q741|A0A0A6Q741_CANAL; tr|A0A0A6M7H0|A0A0A6M7H0_CANAL; tr|A0A0A6M386|A0A0A6M386_CANAX; tr|A0A0A6LGT0|A0A0A6LGT0_CANAX; tr|A0A0A6L5Y0|A0A0A6L5Y0_CANAX; tr|A0A0A6L1C0|A0A0A6L1C0_CANAX; tr|A0A0A6KWM0|A0A0A6KWM0_CANAX; tr|A0A0A6K9D4|A0A0A6K9D4_CANAX; tr|A0A0A6K455|A0A0A6K455_CANAX; tr|A0A0A6JWU4|A0A0A6JWU4_CANAX; tr|A0A0A6J9A0|A0A0A6J9A0_CANAX; tr|A0A0A6J199|A0A0A6J19…	Elongation factor 1-alpha OS=Candida albicans (strain WO-1) GN=CAWG_00588 PE=3 SV=1; Elongation factor 1-alpha OS=Candida albicans (strain SC5314 / ATCC MYA-2876) GN=I503_00814 PE=3 SV=1; Elongation factor 1-alpha OS=Candida albicans (strain SC5314 / ATCC MYA-2876) GN=W5Q_02251 PE=3 SV=1; Elongation factor 1-alpha OS=Candida albicans P78042 GN=MGS_00808 PE=3 SV=1; Elongation factor 1-alpha OS=Can…			0	99	IDRRTGKKLEENPKFVKSGDAAIVK		missed R-R@3; missed R-T@4; missed K-K@7; missed K-L@8; missed K-F@14; missed K-S@17	0.00293033	2798.58	700.652	2798.58	700.651	4	18	1.1.1.1623.2	1	10.9756	330.556	10.7807
1	93.17	93.17	63.97	63.97	63.97	tr|C4YDJ3|C4YDJ3_CANAW; tr|A0A0A6Q741|A0A0A6Q741_CANAL; tr|A0A0A6M7H0|A0A0A6M7H0_CANAL; tr|A0A0A6M386|A0A0A6M386_CANAX; tr|A0A0A6LGT0|A0A0A6LGT0_CANAX; tr|A0A0A6L5Y0|A0A0A6L5Y0_CANAX; tr|A0A0A6L1C0|A0A0A6L1C0_CANAX; tr|A0A0A6KWM0|A0A0A6KWM0_CANAX; tr|A0A0A6K9D4|A0A0A6K9D4_CANAX; tr|A0A0A6K455|A0A0A6K455_CANAX; tr|A0A0A6JWU4|A0A0A6JWU4_CANAX; tr|A0A0A6J9A0|A0A0A6J9A0_CANAX; tr|A0A0A6J199|A0A0A6J19…	Elongation factor 1-alpha OS=Candida albicans (strain WO-1) GN=CAWG_00588 PE=3 SV=1; Elongation factor 1-alpha OS=Candida albicans (strain SC5314 / ATCC MYA-2876) GN=I503_00814 PE=3 SV=1; Elongation factor 1-alpha OS=Candida albicans (strain SC5314 / ATCC MYA-2876) GN=W5Q_02251 PE=3 SV=1; Elongation factor 1-alpha OS=Candida albicans P78042 GN=MGS_00808 PE=3 SV=1; Elongation factor 1-alpha OS=Can…			0	99	IDRRTGKKLEENPKFVKSGDAAIVK		missed R-R@3; missed R-T@4; missed K-K@7; missed K-L@8; missed K-F@14; missed K-S@17	0.00293033	2798.58	700.652	2798.58	700.651	4	15	1.1.1.1624.5	1	11.0155	330.556	10.7807
1	93.17	93.17	63.97	63.97	63.97	tr|C4YDJ3|C4YDJ3_CANAW; tr|A0A0A6Q741|A0A0A6Q741_CANAL; tr|A0A0A6M7H0|A0A0A6M7H0_CANAL; tr|A0A0A6M386|A0A0A6M386_CANAX; tr|A0A0A6LGT0|A0A0A6LGT0_CANAX; tr|A0A0A6L5Y0|A0A0A6L5Y0_CANAX; tr|A0A0A6L1C0|A0A0A6L1C0_CANAX; tr|A0A0A6KWM0|A0A0A6KWM0_CANAX; tr|A0A0A6K9D4|A0A0A6K9D4_CANAX; tr|A0A0A6K455|A0A0A6K455_CANAX; tr|A0A0A6JWU4|A0A0A6JWU4_CANAX; tr|A0A0A6J9A0|A0A0A6J9A0_CANAX; tr|A0A0A6J199|A0A0A6J19…	Elongation factor 1-alpha OS=Candida albicans (strain WO-1) GN=CAWG_00588 PE=3 SV=1; Elongation factor 1-alpha OS=Candida albicans (strain SC5314 / ATCC MYA-2876) GN=I503_00814 PE=3 SV=1; Elongation factor 1-alpha OS=Candida albicans (strain SC5314 / ATCC MYA-2876) GN=W5Q_02251 PE=3 SV=1; Elongation factor 1-alpha OS=Candida albicans P78042 GN=MGS_00808 PE=3 SV=1; Elongation factor 1-alpha OS=Can…			0	99	IDRRTGKKLEENPKFVKSGDAAIVK	Deamidated(N)@12	missed R-R@3; missed R-T@4; missed K-K@7; missed K-L@8; missed K-F@14; missed K-S@17	0.00457993	2799.57	467.601	2799.56	467.601	6	16	1.1.1.1633.3	1	11.3584	223.119	11.4592
1	93.17	93.17	63.97	63.97	63.97	tr|C4YDJ3|C4YDJ3_CANAW; tr|A0A0A6Q741|A0A0A6Q741_CANAL; tr|A0A0A6M7H0|A0A0A6M7H0_CANAL; tr|A0A0A6M386|A0A0A6M386_CANAX; tr|A0A0A6LGT0|A0A0A6LGT0_CANAX; tr|A0A0A6L5Y0|A0A0A6L5Y0_CANAX; tr|A0A0A6L1C0|A0A0A6L1C0_CANAX; tr|A0A0A6KWM0|A0A0A6KWM0_CANAX; tr|A0A0A6K9D4|A0A0A6K9D4_CANAX; tr|A0A0A6K455|A0A0A6K455_CANAX; tr|A0A0A6JWU4|A0A0A6JWU4_CANAX; tr|A0A0A6J9A0|A0A0A6J9A0_CANAX; tr|A0A0A6J199|A0A0A6J19…	Elongation factor 1-alpha OS=Candida albicans (strain WO-1) GN=CAWG_00588 PE=3 SV=1; Elongation factor 1-alpha OS=Candida albicans (strain SC5314 / ATCC MYA-2876) GN=I503_00814 PE=3 SV=1; Elongation factor 1-alpha OS=Candida albicans (strain SC5314 / ATCC MYA-2876) GN=W5Q_02251 PE=3 SV=1; Elongation factor 1-alpha OS=Candida albicans P78042 GN=MGS_00808 PE=3 SV=1; Elongation factor 1-alpha OS=Can…			0	99	IDRRTGKKLEENPKFVKSGDAAIVK	Deamidated(N)@12	missed R-R@3; missed R-T@4; missed K-K@7; missed K-L@8; missed K-F@14; missed K-S@17	0.00457993	2799.57	467.601	2799.56	467.601	6	11	1.1.1.1636.6	1	11.4848	223.119	11.4592
1	93.17	93.17	63.97	63.97	63.97	tr|C4YDJ3|C4YDJ3_CANAW; tr|A0A0A6Q741|A0A0A6Q741_CANAL; tr|A0A0A6M7H0|A0A0A6M7H0_CANAL; tr|A0A0A6M386|A0A0A6M386_CANAX; tr|A0A0A6LGT0|A0A0A6LGT0_CANAX; tr|A0A0A6L5Y0|A0A0A6L5Y0_CANAX; tr|A0A0A6L1C0|A0A0A6L1C0_CANAX; tr|A0A0A6KWM0|A0A0A6KWM0_CANAX; tr|A0A0A6K9D4|A0A0A6K9D4_CANAX; tr|A0A0A6K455|A0A0A6K455_CANAX; tr|A0A0A6JWU4|A0A0A6JWU4_CANAX; tr|A0A0A6J9A0|A0A0A6J9A0_CANAX; tr|A0A0A6J199|A0A0A6J19…	Elongation factor 1-alpha OS=Candida albicans (strain WO-1) GN=CAWG_00588 PE=3 SV=1; Elongation factor 1-alpha OS=Candida albicans (strain SC5314 / ATCC MYA-2876) GN=I503_00814 PE=3 SV=1; Elongation factor 1-alpha OS=Candida albicans (strain SC5314 / ATCC MYA-2876) GN=W5Q_02251 PE=3 SV=1; Elongation factor 1-alpha OS=Candida albicans P78042 GN=MGS_00808 PE=3 SV=1; Elongation factor 1-alpha OS=Can…			0	18.02	IDRRTGKKLEENPKFVKSGDAAIVK		missed R-R@3; missed R-T@4; missed K-K@7; missed K-L@8; missed K-F@14; missed K-S@17	-0.00673963	2798.57	467.436	2798.58	467.437	6	7	1.1.1.1629.4	1	11.1953	1009.94	10.7807
1	93.17	93.17	63.97	63.97	63.97	tr|C4YDJ3|C4YDJ3_CANAW; tr|A0A0A6Q741|A0A0A6Q741_CANAL; tr|A0A0A6M7H0|A0A0A6M7H0_CANAL; tr|A0A0A6M386|A0A0A6M386_CANAX; tr|A0A0A6LGT0|A0A0A6LGT0_CANAX; tr|A0A0A6L5Y0|A0A0A6L5Y0_CANAX; tr|A0A0A6L1C0|A0A0A6L1C0_CANAX; tr|A0A0A6KWM0|A0A0A6KWM0_CANAX; tr|A0A0A6K9D4|A0A0A6K9D4_CANAX; tr|A0A0A6K455|A0A0A6K455_CANAX; tr|A0A0A6JWU4|A0A0A6JWU4_CANAX; tr|A0A0A6J9A0|A0A0A6J9A0_CANAX; tr|A0A0A6J199|A0A0A6J19…	Elongation factor 1-alpha OS=Candida albicans (strain WO-1) GN=CAWG_00588 PE=3 SV=1; Elongation factor 1-alpha OS=Candida albicans (strain SC5314 / ATCC MYA-2876) GN=I503_00814 PE=3 SV=1; Elongation factor 1-alpha OS=Candida albicans (strain SC5314 / ATCC MYA-2876) GN=W5Q_02251 PE=3 SV=1; Elongation factor 1-alpha OS=Candida albicans P78042 GN=MGS_00808 PE=3 SV=1; Elongation factor 1-alpha OS=Can…			0	99	IGGIGTVPVGRVETGIIK		missed R-V@11	0.00421085	1765.05	883.533	1765.05	883.53	2	22	1.1.1.1956.19	1	24.2836	2307.66	24.3281
1	93.17	93.17	63.97	63.97	63.97	tr|C4YDJ3|C4YDJ3_CANAW; tr|A0A0A6Q741|A0A0A6Q741_CANAL; tr|A0A0A6M7H0|A0A0A6M7H0_CANAL; tr|A0A0A6M386|A0A0A6M386_CANAX; tr|A0A0A6LGT0|A0A0A6LGT0_CANAX; tr|A0A0A6L5Y0|A0A0A6L5Y0_CANAX; tr|A0A0A6L1C0|A0A0A6L1C0_CANAX; tr|A0A0A6KWM0|A0A0A6KWM0_CANAX; tr|A0A0A6K9D4|A0A0A6K9D4_CANAX; tr|A0A0A6K455|A0A0A6K455_CANAX; tr|A0A0A6JWU4|A0A0A6JWU4_CANAX; tr|A0A0A6J9A0|A0A0A6J9A0_CANAX; tr|A0A0A6J199|A0A0A6J19…	Elongation factor 1-alpha OS=Candida albicans (strain WO-1) GN=CAWG_00588 PE=3 SV=1; Elongation factor 1-alpha OS=Candida albicans (strain SC5314 / ATCC MYA-2876) GN=I503_00814 PE=3 SV=1; Elongation factor 1-alpha OS=Candida albicans (strain SC5314 / ATCC MYA-2876) GN=W5Q_02251 PE=3 SV=1; Elongation factor 1-alpha OS=Candida albicans P78042 GN=MGS_00808 PE=3 SV=1; Elongation factor 1-alpha OS=Can…			0	99	IGGIGTVPVGRVETGIIK		missed R-V@11	0.00421085	1765.05	883.533	1765.05	883.53	2	18	1.1.1.1959.19	1	24.4038	2307.66	24.3281
1	93.17	93.17	63.97	63.97	63.97	tr|C4YDJ3|C4YDJ3_CANAW; tr|A0A0A6Q741|A0A0A6Q741_CANAL; tr|A0A0A6M7H0|A0A0A6M7H0_CANAL; tr|A0A0A6M386|A0A0A6M386_CANAX; tr|A0A0A6LGT0|A0A0A6LGT0_CANAX; tr|A0A0A6L5Y0|A0A0A6L5Y0_CANAX; tr|A0A0A6L1C0|A0A0A6L1C0_CANAX; tr|A0A0A6KWM0|A0A0A6KWM0_CANAX; tr|A0A0A6K9D4|A0A0A6K9D4_CANAX; tr|A0A0A6K455|A0A0A6K455_CANAX; tr|A0A0A6JWU4|A0A0A6JWU4_CANAX; tr|A0A0A6J9A0|A0A0A6J9A0_CANAX; tr|A0A0A6J199|A0A0A6J19…	Elongation factor 1-alpha OS=Candida albicans (strain WO-1) GN=CAWG_00588 PE=3 SV=1; Elongation factor 1-alpha OS=Candida albicans (strain SC5314 / ATCC MYA-2876) GN=I503_00814 PE=3 SV=1; Elongation factor 1-alpha OS=Candida albicans (strain SC5314 / ATCC MYA-2876) GN=W5Q_02251 PE=3 SV=1; Elongation factor 1-alpha OS=Candida albicans P78042 GN=MGS_00808 PE=3 SV=1; Elongation factor 1-alpha OS=Can…			0	99	IGGIGTVPVGRVETGIIK		missed R-V@11	-0.000630856	1765.05	589.356	1765.05	589.356	3	15	1.1.1.1962.8	1	24.5058	10217.7	24.3281
1	93.17	93.17	63.97	63.97	63.97	tr|C4YDJ3|C4YDJ3_CANAW; tr|A0A0A6Q741|A0A0A6Q741_CANAL; tr|A0A0A6M7H0|A0A0A6M7H0_CANAL; tr|A0A0A6M386|A0A0A6M386_CANAX; tr|A0A0A6LGT0|A0A0A6LGT0_CANAX; tr|A0A0A6L5Y0|A0A0A6L5Y0_CANAX; tr|A0A0A6L1C0|A0A0A6L1C0_CANAX; tr|A0A0A6KWM0|A0A0A6KWM0_CANAX; tr|A0A0A6K9D4|A0A0A6K9D4_CANAX; tr|A0A0A6K455|A0A0A6K455_CANAX; tr|A0A0A6JWU4|A0A0A6JWU4_CANAX; tr|A0A0A6J9A0|A0A0A6J9A0_CANAX; tr|A0A0A6J199|A0A0A6J19…	Elongation factor 1-alpha OS=Candida albicans (strain WO-1) GN=CAWG_00588 PE=3 SV=1; Elongation factor 1-alpha OS=Candida albicans (strain SC5314 / ATCC MYA-2876) GN=I503_00814 PE=3 SV=1; Elongation factor 1-alpha OS=Candida albicans (strain SC5314 / ATCC MYA-2876) GN=W5Q_02251 PE=3 SV=1; Elongation factor 1-alpha OS=Candida albicans P78042 GN=MGS_00808 PE=3 SV=1; Elongation factor 1-alpha OS=Can…			0	99	IGGIGTVPVGRVETGIIK		missed R-V@11	-0.00162935	1765.04	589.356	1765.05	589.356	3	15	1.1.1.1955.9	1	24.2269	10218.8	24.3281
1	93.17	93.17	63.97	63.97	63.97	tr|C4YDJ3|C4YDJ3_CANAW; tr|A0A0A6Q741|A0A0A6Q741_CANAL; tr|A0A0A6M7H0|A0A0A6M7H0_CANAL; tr|A0A0A6M386|A0A0A6M386_CANAX; tr|A0A0A6LGT0|A0A0A6LGT0_CANAX; tr|A0A0A6L5Y0|A0A0A6L5Y0_CANAX; tr|A0A0A6L1C0|A0A0A6L1C0_CANAX; tr|A0A0A6KWM0|A0A0A6KWM0_CANAX; tr|A0A0A6K9D4|A0A0A6K9D4_CANAX; tr|A0A0A6K455|A0A0A6K455_CANAX; tr|A0A0A6JWU4|A0A0A6JWU4_CANAX; tr|A0A0A6J9A0|A0A0A6J9A0_CANAX; tr|A0A0A6J199|A0A0A6J19…	Elongation factor 1-alpha OS=Candida albicans (strain WO-1) GN=CAWG_00588 PE=3 SV=1; Elongation factor 1-alpha OS=Candida albicans (strain SC5314 / ATCC MYA-2876) GN=I503_00814 PE=3 SV=1; Elongation factor 1-alpha OS=Candida albicans (strain SC5314 / ATCC MYA-2876) GN=W5Q_02251 PE=3 SV=1; Elongation factor 1-alpha OS=Candida albicans P78042 GN=MGS_00808 PE=3 SV=1; Elongation factor 1-alpha OS=Can…			0	99	IGGIGTVPVGRVETGIIKAGMVVTFAPAGVTTEVK	Oxidation(M)@21	missed R-V@11; missed K-A@18	-0.00198681	3439.91	860.985	3439.91	860.985	4	24	1.1.1.2207.18	1	34.3481	17831.6	34.5542
1	93.17	93.17	63.97	63.97	63.97	tr|C4YDJ3|C4YDJ3_CANAW; tr|A0A0A6Q741|A0A0A6Q741_CANAL; tr|A0A0A6M7H0|A0A0A6M7H0_CANAL; tr|A0A0A6M386|A0A0A6M386_CANAX; tr|A0A0A6LGT0|A0A0A6LGT0_CANAX; tr|A0A0A6L5Y0|A0A0A6L5Y0_CANAX; tr|A0A0A6L1C0|A0A0A6L1C0_CANAX; tr|A0A0A6KWM0|A0A0A6KWM0_CANAX; tr|A0A0A6K9D4|A0A0A6K9D4_CANAX; tr|A0A0A6K455|A0A0A6K455_CANAX; tr|A0A0A6JWU4|A0A0A6JWU4_CANAX; tr|A0A0A6J9A0|A0A0A6J9A0_CANAX; tr|A0A0A6J199|A0A0A6J19…	Elongation factor 1-alpha OS=Candida albicans (strain WO-1) GN=CAWG_00588 PE=3 SV=1; Elongation factor 1-alpha OS=Candida albicans (strain SC5314 / ATCC MYA-2876) GN=I503_00814 PE=3 SV=1; Elongation factor 1-alpha OS=Candida albicans (strain SC5314 / ATCC MYA-2876) GN=W5Q_02251 PE=3 SV=1; Elongation factor 1-alpha OS=Candida albicans P78042 GN=MGS_00808 PE=3 SV=1; Elongation factor 1-alpha OS=Can…			0	99	IGGIGTVPVGRVETGIIKAGMVVTFAPAGVTTEVK	Oxidation(M)@21	missed R-V@11; missed K-A@18	-0.00198681	3439.91	860.985	3439.91	860.985	4	28	1.1.1.2210.19	1	34.4699	17831.6	34.5542
1	93.17	93.17	63.97	63.97	63.97	tr|C4YDJ3|C4YDJ3_CANAW; tr|A0A0A6Q741|A0A0A6Q741_CANAL; tr|A0A0A6M7H0|A0A0A6M7H0_CANAL; tr|A0A0A6M386|A0A0A6M386_CANAX; tr|A0A0A6LGT0|A0A0A6LGT0_CANAX; tr|A0A0A6L5Y0|A0A0A6L5Y0_CANAX; tr|A0A0A6L1C0|A0A0A6L1C0_CANAX; tr|A0A0A6KWM0|A0A0A6KWM0_CANAX; tr|A0A0A6K9D4|A0A0A6K9D4_CANAX; tr|A0A0A6K455|A0A0A6K455_CANAX; tr|A0A0A6JWU4|A0A0A6JWU4_CANAX; tr|A0A0A6J9A0|A0A0A6J9A0_CANAX; tr|A0A0A6J199|A0A0A6J19…	Elongation factor 1-alpha OS=Candida albicans (strain WO-1) GN=CAWG_00588 PE=3 SV=1; Elongation factor 1-alpha OS=Candida albicans (strain SC5314 / ATCC MYA-2876) GN=I503_00814 PE=3 SV=1; Elongation factor 1-alpha OS=Candida albicans (strain SC5314 / ATCC MYA-2876) GN=W5Q_02251 PE=3 SV=1; Elongation factor 1-alpha OS=Candida albicans P78042 GN=MGS_00808 PE=3 SV=1; Elongation factor 1-alpha OS=Can…			0	99	IGGIGTVPVGRVETGIIKAGMVVTFAPAGVTTEVK	Oxidation(M)@21	missed R-V@11; missed K-A@18	-0.00198681	3439.91	860.985	3439.91	860.985	4	27	1.1.1.2216.19	1	34.7097	17831.6	34.5542
1	93.17	93.17	63.97	63.97	63.97	tr|C4YDJ3|C4YDJ3_CANAW; tr|A0A0A6Q741|A0A0A6Q741_CANAL; tr|A0A0A6M7H0|A0A0A6M7H0_CANAL; tr|A0A0A6M386|A0A0A6M386_CANAX; tr|A0A0A6LGT0|A0A0A6LGT0_CANAX; tr|A0A0A6L5Y0|A0A0A6L5Y0_CANAX; tr|A0A0A6L1C0|A0A0A6L1C0_CANAX; tr|A0A0A6KWM0|A0A0A6KWM0_CANAX; tr|A0A0A6K9D4|A0A0A6K9D4_CANAX; tr|A0A0A6K455|A0A0A6K455_CANAX; tr|A0A0A6JWU4|A0A0A6JWU4_CANAX; tr|A0A0A6J9A0|A0A0A6J9A0_CANAX; tr|A0A0A6J199|A0A0A6J19…	Elongation factor 1-alpha OS=Candida albicans (strain WO-1) GN=CAWG_00588 PE=3 SV=1; Elongation factor 1-alpha OS=Candida albicans (strain SC5314 / ATCC MYA-2876) GN=I503_00814 PE=3 SV=1; Elongation factor 1-alpha OS=Candida albicans (strain SC5314 / ATCC MYA-2876) GN=W5Q_02251 PE=3 SV=1; Elongation factor 1-alpha OS=Candida albicans P78042 GN=MGS_00808 PE=3 SV=1; Elongation factor 1-alpha OS=Can…			0	99	IGGIGTVPVGRVETGIIKAGMVVTFAPAGVTTEVK	Oxidation(M)@21	missed R-V@11; missed K-A@18	-0.00198681	3439.91	860.985	3439.91	860.985	4	25	1.1.1.2219.18	1	34.8278	17831.6	34.5542
1	93.17	93.17	63.97	63.97	63.97	tr|C4YDJ3|C4YDJ3_CANAW; tr|A0A0A6Q741|A0A0A6Q741_CANAL; tr|A0A0A6M7H0|A0A0A6M7H0_CANAL; tr|A0A0A6M386|A0A0A6M386_CANAX; tr|A0A0A6LGT0|A0A0A6LGT0_CANAX; tr|A0A0A6L5Y0|A0A0A6L5Y0_CANAX; tr|A0A0A6L1C0|A0A0A6L1C0_CANAX; tr|A0A0A6KWM0|A0A0A6KWM0_CANAX; tr|A0A0A6K9D4|A0A0A6K9D4_CANAX; tr|A0A0A6K455|A0A0A6K455_CANAX; tr|A0A0A6JWU4|A0A0A6JWU4_CANAX; tr|A0A0A6J9A0|A0A0A6J9A0_CANAX; tr|A0A0A6J199|A0A0A6J19…	Elongation factor 1-alpha OS=Candida albicans (strain WO-1) GN=CAWG_00588 PE=3 SV=1; Elongation factor 1-alpha OS=Candida albicans (strain SC5314 / ATCC MYA-2876) GN=I503_00814 PE=3 SV=1; Elongation factor 1-alpha OS=Candida albicans (strain SC5314 / ATCC MYA-2876) GN=W5Q_02251 PE=3 SV=1; Elongation factor 1-alpha OS=Candida albicans P78042 GN=MGS_00808 PE=3 SV=1; Elongation factor 1-alpha OS=Can…			0	99	IGGIGTVPVGRVETGIIKAGMVVTFAPAGVTTEVK	Oxidation(M)@21	missed R-V@11; missed K-A@18	-0.00174268	3439.91	860.985	3439.91	860.985	4	19	1.1.1.2222.19	1	34.9493	18328.2	34.5542
1	93.17	93.17	63.97	63.97	63.97	tr|C4YDJ3|C4YDJ3_CANAW; tr|A0A0A6Q741|A0A0A6Q741_CANAL; tr|A0A0A6M7H0|A0A0A6M7H0_CANAL; tr|A0A0A6M386|A0A0A6M386_CANAX; tr|A0A0A6LGT0|A0A0A6LGT0_CANAX; tr|A0A0A6L5Y0|A0A0A6L5Y0_CANAX; tr|A0A0A6L1C0|A0A0A6L1C0_CANAX; tr|A0A0A6KWM0|A0A0A6KWM0_CANAX; tr|A0A0A6K9D4|A0A0A6K9D4_CANAX; tr|A0A0A6K455|A0A0A6K455_CANAX; tr|A0A0A6JWU4|A0A0A6JWU4_CANAX; tr|A0A0A6J9A0|A0A0A6J9A0_CANAX; tr|A0A0A6J199|A0A0A6J19…	Elongation factor 1-alpha OS=Candida albicans (strain WO-1) GN=CAWG_00588 PE=3 SV=1; Elongation factor 1-alpha OS=Candida albicans (strain SC5314 / ATCC MYA-2876) GN=I503_00814 PE=3 SV=1; Elongation factor 1-alpha OS=Candida albicans (strain SC5314 / ATCC MYA-2876) GN=W5Q_02251 PE=3 SV=1; Elongation factor 1-alpha OS=Candida albicans P78042 GN=MGS_00808 PE=3 SV=1; Elongation factor 1-alpha OS=Can…			0	99	IGGIGTVPVGRVETGIIKAGMVVTFAPAGVTTEVK	Oxidation(M)@21	missed R-V@11; missed K-A@18	-0.00125441	3439.91	860.985	3439.91	860.985	4	18	1.1.1.2226.19	1	35.1091	9824.41	34.6741
1	93.17	93.17	63.97	63.97	63.97	tr|C4YDJ3|C4YDJ3_CANAW; tr|A0A0A6Q741|A0A0A6Q741_CANAL; tr|A0A0A6M7H0|A0A0A6M7H0_CANAL; tr|A0A0A6M386|A0A0A6M386_CANAX; tr|A0A0A6LGT0|A0A0A6LGT0_CANAX; tr|A0A0A6L5Y0|A0A0A6L5Y0_CANAX; tr|A0A0A6L1C0|A0A0A6L1C0_CANAX; tr|A0A0A6KWM0|A0A0A6KWM0_CANAX; tr|A0A0A6K9D4|A0A0A6K9D4_CANAX; tr|A0A0A6K455|A0A0A6K455_CANAX; tr|A0A0A6JWU4|A0A0A6JWU4_CANAX; tr|A0A0A6J9A0|A0A0A6J9A0_CANAX; tr|A0A0A6J199|A0A0A6J19…	Elongation factor 1-alpha OS=Candida albicans (strain WO-1) GN=CAWG_00588 PE=3 SV=1; Elongation factor 1-alpha OS=Candida albicans (strain SC5314 / ATCC MYA-2876) GN=I503_00814 PE=3 SV=1; Elongation factor 1-alpha OS=Candida albicans (strain SC5314 / ATCC MYA-2876) GN=W5Q_02251 PE=3 SV=1; Elongation factor 1-alpha OS=Candida albicans P78042 GN=MGS_00808 PE=3 SV=1; Elongation factor 1-alpha OS=Can…			0	99	KEKTHVNVVVIGHVDSGK	Octanoyl(T)@4; Deamidated(N)@7	cleaved G-K@N-term; missed K-E@1; missed K-T@3	0.00948976	2072.17	519.05	2072.16	519.048	4	15	1.1.1.1601.3	1	10.0964	413.533	9.9518
1	93.17	93.17	63.97	63.97	63.97	tr|C4YDJ3|C4YDJ3_CANAW; tr|A0A0A6Q741|A0A0A6Q741_CANAL; tr|A0A0A6M7H0|A0A0A6M7H0_CANAL; tr|A0A0A6M386|A0A0A6M386_CANAX; tr|A0A0A6LGT0|A0A0A6LGT0_CANAX; tr|A0A0A6L5Y0|A0A0A6L5Y0_CANAX; tr|A0A0A6L1C0|A0A0A6L1C0_CANAX; tr|A0A0A6KWM0|A0A0A6KWM0_CANAX; tr|A0A0A6K9D4|A0A0A6K9D4_CANAX; tr|A0A0A6K455|A0A0A6K455_CANAX; tr|A0A0A6JWU4|A0A0A6JWU4_CANAX; tr|A0A0A6J9A0|A0A0A6J9A0_CANAX; tr|A0A0A6J199|A0A0A6J19…	Elongation factor 1-alpha OS=Candida albicans (strain WO-1) GN=CAWG_00588 PE=3 SV=1; Elongation factor 1-alpha OS=Candida albicans (strain SC5314 / ATCC MYA-2876) GN=I503_00814 PE=3 SV=1; Elongation factor 1-alpha OS=Candida albicans (strain SC5314 / ATCC MYA-2876) GN=W5Q_02251 PE=3 SV=1; Elongation factor 1-alpha OS=Candida albicans P78042 GN=MGS_00808 PE=3 SV=1; Elongation factor 1-alpha OS=Can…			0	99	KEKTHVNVVVIGHVDSGK	Octanoyl(T)@4; Deamidated(N)@7	cleaved G-K@N-term; missed K-E@1; missed K-T@3	0.00948976	2072.17	519.05	2072.16	519.048	4	14	1.1.1.1598.2	1	9.9721	413.533	9.9518
1	93.17	93.17	63.97	63.97	63.97	tr|C4YDJ3|C4YDJ3_CANAW; tr|A0A0A6Q741|A0A0A6Q741_CANAL; tr|A0A0A6M7H0|A0A0A6M7H0_CANAL; tr|A0A0A6M386|A0A0A6M386_CANAX; tr|A0A0A6LGT0|A0A0A6LGT0_CANAX; tr|A0A0A6L5Y0|A0A0A6L5Y0_CANAX; tr|A0A0A6L1C0|A0A0A6L1C0_CANAX; tr|A0A0A6KWM0|A0A0A6KWM0_CANAX; tr|A0A0A6K9D4|A0A0A6K9D4_CANAX; tr|A0A0A6K455|A0A0A6K455_CANAX; tr|A0A0A6JWU4|A0A0A6JWU4_CANAX; tr|A0A0A6J9A0|A0A0A6J9A0_CANAX; tr|A0A0A6J199|A0A0A6J19…	Elongation factor 1-alpha OS=Candida albicans (strain WO-1) GN=CAWG_00588 PE=3 SV=1; Elongation factor 1-alpha OS=Candida albicans (strain SC5314 / ATCC MYA-2876) GN=I503_00814 PE=3 SV=1; Elongation factor 1-alpha OS=Candida albicans (strain SC5314 / ATCC MYA-2876) GN=W5Q_02251 PE=3 SV=1; Elongation factor 1-alpha OS=Candida albicans P78042 GN=MGS_00808 PE=3 SV=1; Elongation factor 1-alpha OS=Can…			0	98.77	KEKTHVNVVVIGHVDSGK	Octanoyl(T)@4; Deamidated(N)@7	cleaved G-K@N-term; missed K-E@1; missed K-T@3	0.00948976	2072.17	519.05	2072.16	519.048	4	13	1.1.1.1604.4	1	10.2175	413.533	9.9518
1	93.17	93.17	63.97	63.97	63.97	tr|C4YDJ3|C4YDJ3_CANAW; tr|A0A0A6Q741|A0A0A6Q741_CANAL; tr|A0A0A6M7H0|A0A0A6M7H0_CANAL; tr|A0A0A6M386|A0A0A6M386_CANAX; tr|A0A0A6LGT0|A0A0A6LGT0_CANAX; tr|A0A0A6L5Y0|A0A0A6L5Y0_CANAX; tr|A0A0A6L1C0|A0A0A6L1C0_CANAX; tr|A0A0A6KWM0|A0A0A6KWM0_CANAX; tr|A0A0A6K9D4|A0A0A6K9D4_CANAX; tr|A0A0A6K455|A0A0A6K455_CANAX; tr|A0A0A6JWU4|A0A0A6JWU4_CANAX; tr|A0A0A6J9A0|A0A0A6J9A0_CANAX; tr|A0A0A6J199|A0A0A6J19…	Elongation factor 1-alpha OS=Candida albicans (strain WO-1) GN=CAWG_00588 PE=3 SV=1; Elongation factor 1-alpha OS=Candida albicans (strain SC5314 / ATCC MYA-2876) GN=I503_00814 PE=3 SV=1; Elongation factor 1-alpha OS=Candida albicans (strain SC5314 / ATCC MYA-2876) GN=W5Q_02251 PE=3 SV=1; Elongation factor 1-alpha OS=Candida albicans P78042 GN=MGS_00808 PE=3 SV=1; Elongation factor 1-alpha OS=Can…			0	99	KLEENPKFVKSGDAAIVK		missed K-L@1; missed K-F@7; missed K-S@10	-0.00129614	1972.1	494.032	1972.1	494.032	4	23	1.1.1.1651.5	1	12.0837	8550.35	12.2972
1	93.17	93.17	63.97	63.97	63.97	tr|C4YDJ3|C4YDJ3_CANAW; tr|A0A0A6Q741|A0A0A6Q741_CANAL; tr|A0A0A6M7H0|A0A0A6M7H0_CANAL; tr|A0A0A6M386|A0A0A6M386_CANAX; tr|A0A0A6LGT0|A0A0A6LGT0_CANAX; tr|A0A0A6L5Y0|A0A0A6L5Y0_CANAX; tr|A0A0A6L1C0|A0A0A6L1C0_CANAX; tr|A0A0A6KWM0|A0A0A6KWM0_CANAX; tr|A0A0A6K9D4|A0A0A6K9D4_CANAX; tr|A0A0A6K455|A0A0A6K455_CANAX; tr|A0A0A6JWU4|A0A0A6JWU4_CANAX; tr|A0A0A6J9A0|A0A0A6J9A0_CANAX; tr|A0A0A6J199|A0A0A6J19…	Elongation factor 1-alpha OS=Candida albicans (strain WO-1) GN=CAWG_00588 PE=3 SV=1; Elongation factor 1-alpha OS=Candida albicans (strain SC5314 / ATCC MYA-2876) GN=I503_00814 PE=3 SV=1; Elongation factor 1-alpha OS=Candida albicans (strain SC5314 / ATCC MYA-2876) GN=W5Q_02251 PE=3 SV=1; Elongation factor 1-alpha OS=Candida albicans P78042 GN=MGS_00808 PE=3 SV=1; Elongation factor 1-alpha OS=Can…			0	99	KLEENPKFVKSGDAAIVK		missed K-L@1; missed K-F@7; missed K-S@10	-0.00129614	1972.1	494.032	1972.1	494.032	4	30	1.1.1.1654.3	1	12.1899	8550.35	12.2972
1	93.17	93.17	63.97	63.97	63.97	tr|C4YDJ3|C4YDJ3_CANAW; tr|A0A0A6Q741|A0A0A6Q741_CANAL; tr|A0A0A6M7H0|A0A0A6M7H0_CANAL; tr|A0A0A6M386|A0A0A6M386_CANAX; tr|A0A0A6LGT0|A0A0A6LGT0_CANAX; tr|A0A0A6L5Y0|A0A0A6L5Y0_CANAX; tr|A0A0A6L1C0|A0A0A6L1C0_CANAX; tr|A0A0A6KWM0|A0A0A6KWM0_CANAX; tr|A0A0A6K9D4|A0A0A6K9D4_CANAX; tr|A0A0A6K455|A0A0A6K455_CANAX; tr|A0A0A6JWU4|A0A0A6JWU4_CANAX; tr|A0A0A6J9A0|A0A0A6J9A0_CANAX; tr|A0A0A6J199|A0A0A6J19…	Elongation factor 1-alpha OS=Candida albicans (strain WO-1) GN=CAWG_00588 PE=3 SV=1; Elongation factor 1-alpha OS=Candida albicans (strain SC5314 / ATCC MYA-2876) GN=I503_00814 PE=3 SV=1; Elongation factor 1-alpha OS=Candida albicans (strain SC5314 / ATCC MYA-2876) GN=W5Q_02251 PE=3 SV=1; Elongation factor 1-alpha OS=Candida albicans P78042 GN=MGS_00808 PE=3 SV=1; Elongation factor 1-alpha OS=Can…			0	99	KLEENPKFVKSGDAAIVK		missed K-L@1; missed K-F@7; missed K-S@10	-0.00129614	1972.1	494.032	1972.1	494.032	4	30	1.1.1.1657.2	1	12.306	8550.35	12.2972
1	93.17	93.17	63.97	63.97	63.97	tr|C4YDJ3|C4YDJ3_CANAW; tr|A0A0A6Q741|A0A0A6Q741_CANAL; tr|A0A0A6M7H0|A0A0A6M7H0_CANAL; tr|A0A0A6M386|A0A0A6M386_CANAX; tr|A0A0A6LGT0|A0A0A6LGT0_CANAX; tr|A0A0A6L5Y0|A0A0A6L5Y0_CANAX; tr|A0A0A6L1C0|A0A0A6L1C0_CANAX; tr|A0A0A6KWM0|A0A0A6KWM0_CANAX; tr|A0A0A6K9D4|A0A0A6K9D4_CANAX; tr|A0A0A6K455|A0A0A6K455_CANAX; tr|A0A0A6JWU4|A0A0A6JWU4_CANAX; tr|A0A0A6J9A0|A0A0A6J9A0_CANAX; tr|A0A0A6J199|A0A0A6J19…	Elongation factor 1-alpha OS=Candida albicans (strain WO-1) GN=CAWG_00588 PE=3 SV=1; Elongation factor 1-alpha OS=Candida albicans (strain SC5314 / ATCC MYA-2876) GN=I503_00814 PE=3 SV=1; Elongation factor 1-alpha OS=Candida albicans (strain SC5314 / ATCC MYA-2876) GN=W5Q_02251 PE=3 SV=1; Elongation factor 1-alpha OS=Candida albicans P78042 GN=MGS_00808 PE=3 SV=1; Elongation factor 1-alpha OS=Can…			0	99	KLEENPKFVKSGDAAIVK		missed K-L@1; missed K-F@7; missed K-S@10	-0.00129614	1972.1	494.032	1972.1	494.032	4	28	1.1.1.1660.3	1	12.4321	8550.35	12.2972
1	93.17	93.17	63.97	63.97	63.97	tr|C4YDJ3|C4YDJ3_CANAW; tr|A0A0A6Q741|A0A0A6Q741_CANAL; tr|A0A0A6M7H0|A0A0A6M7H0_CANAL; tr|A0A0A6M386|A0A0A6M386_CANAX; tr|A0A0A6LGT0|A0A0A6LGT0_CANAX; tr|A0A0A6L5Y0|A0A0A6L5Y0_CANAX; tr|A0A0A6L1C0|A0A0A6L1C0_CANAX; tr|A0A0A6KWM0|A0A0A6KWM0_CANAX; tr|A0A0A6K9D4|A0A0A6K9D4_CANAX; tr|A0A0A6K455|A0A0A6K455_CANAX; tr|A0A0A6JWU4|A0A0A6JWU4_CANAX; tr|A0A0A6J9A0|A0A0A6J9A0_CANAX; tr|A0A0A6J199|A0A0A6J19…	Elongation factor 1-alpha OS=Candida albicans (strain WO-1) GN=CAWG_00588 PE=3 SV=1; Elongation factor 1-alpha OS=Candida albicans (strain SC5314 / ATCC MYA-2876) GN=I503_00814 PE=3 SV=1; Elongation factor 1-alpha OS=Candida albicans (strain SC5314 / ATCC MYA-2876) GN=W5Q_02251 PE=3 SV=1; Elongation factor 1-alpha OS=Candida albicans P78042 GN=MGS_00808 PE=3 SV=1; Elongation factor 1-alpha OS=Can…			0	99	KLEENPKFVKSGDAAIVK	Deamidated(N)@5	missed K-L@1; missed K-F@7; missed K-S@10	-0.00572369	1973.08	494.277	1973.08	494.278	4	13	1.1.1.1689.10	1	13.5974	1685.96	13.737
1	93.17	93.17	63.97	63.97	63.97	tr|C4YDJ3|C4YDJ3_CANAW; tr|A0A0A6Q741|A0A0A6Q741_CANAL; tr|A0A0A6M7H0|A0A0A6M7H0_CANAL; tr|A0A0A6M386|A0A0A6M386_CANAX; tr|A0A0A6LGT0|A0A0A6LGT0_CANAX; tr|A0A0A6L5Y0|A0A0A6L5Y0_CANAX; tr|A0A0A6L1C0|A0A0A6L1C0_CANAX; tr|A0A0A6KWM0|A0A0A6KWM0_CANAX; tr|A0A0A6K9D4|A0A0A6K9D4_CANAX; tr|A0A0A6K455|A0A0A6K455_CANAX; tr|A0A0A6JWU4|A0A0A6JWU4_CANAX; tr|A0A0A6J9A0|A0A0A6J9A0_CANAX; tr|A0A0A6J199|A0A0A6J19…	Elongation factor 1-alpha OS=Candida albicans (strain WO-1) GN=CAWG_00588 PE=3 SV=1; Elongation factor 1-alpha OS=Candida albicans (strain SC5314 / ATCC MYA-2876) GN=I503_00814 PE=3 SV=1; Elongation factor 1-alpha OS=Candida albicans (strain SC5314 / ATCC MYA-2876) GN=W5Q_02251 PE=3 SV=1; Elongation factor 1-alpha OS=Candida albicans P78042 GN=MGS_00808 PE=3 SV=1; Elongation factor 1-alpha OS=Can…			0	99	KLEENPKFVKSGDAAIVK	Deamidated(N)@5	missed K-L@1; missed K-F@7; missed K-S@10	-0.00572369	1973.08	494.277	1973.08	494.278	4	17	1.1.1.1692.10	1	13.7176	1685.96	13.737
1	93.17	93.17	63.97	63.97	63.97	tr|C4YDJ3|C4YDJ3_CANAW; tr|A0A0A6Q741|A0A0A6Q741_CANAL; tr|A0A0A6M7H0|A0A0A6M7H0_CANAL; tr|A0A0A6M386|A0A0A6M386_CANAX; tr|A0A0A6LGT0|A0A0A6LGT0_CANAX; tr|A0A0A6L5Y0|A0A0A6L5Y0_CANAX; tr|A0A0A6L1C0|A0A0A6L1C0_CANAX; tr|A0A0A6KWM0|A0A0A6KWM0_CANAX; tr|A0A0A6K9D4|A0A0A6K9D4_CANAX; tr|A0A0A6K455|A0A0A6K455_CANAX; tr|A0A0A6JWU4|A0A0A6JWU4_CANAX; tr|A0A0A6J9A0|A0A0A6J9A0_CANAX; tr|A0A0A6J199|A0A0A6J19…	Elongation factor 1-alpha OS=Candida albicans (strain WO-1) GN=CAWG_00588 PE=3 SV=1; Elongation factor 1-alpha OS=Candida albicans (strain SC5314 / ATCC MYA-2876) GN=I503_00814 PE=3 SV=1; Elongation factor 1-alpha OS=Candida albicans (strain SC5314 / ATCC MYA-2876) GN=W5Q_02251 PE=3 SV=1; Elongation factor 1-alpha OS=Candida albicans P78042 GN=MGS_00808 PE=3 SV=1; Elongation factor 1-alpha OS=Can…			0	99	KLEENPKFVKSGDAAIVK		missed K-L@1; missed K-F@7; missed K-S@10	-0.00129614	1972.1	494.032	1972.1	494.032	4	13	1.1.1.1666.3	1	12.672	8956.92	12.2574
1	93.17	93.17	63.97	63.97	63.97	tr|C4YDJ3|C4YDJ3_CANAW; tr|A0A0A6Q741|A0A0A6Q741_CANAL; tr|A0A0A6M7H0|A0A0A6M7H0_CANAL; tr|A0A0A6M386|A0A0A6M386_CANAX; tr|A0A0A6LGT0|A0A0A6LGT0_CANAX; tr|A0A0A6L5Y0|A0A0A6L5Y0_CANAX; tr|A0A0A6L1C0|A0A0A6L1C0_CANAX; tr|A0A0A6KWM0|A0A0A6KWM0_CANAX; tr|A0A0A6K9D4|A0A0A6K9D4_CANAX; tr|A0A0A6K455|A0A0A6K455_CANAX; tr|A0A0A6JWU4|A0A0A6JWU4_CANAX; tr|A0A0A6J9A0|A0A0A6J9A0_CANAX; tr|A0A0A6J199|A0A0A6J19…	Elongation factor 1-alpha OS=Candida albicans (strain WO-1) GN=CAWG_00588 PE=3 SV=1; Elongation factor 1-alpha OS=Candida albicans (strain SC5314 / ATCC MYA-2876) GN=I503_00814 PE=3 SV=1; Elongation factor 1-alpha OS=Candida albicans (strain SC5314 / ATCC MYA-2876) GN=W5Q_02251 PE=3 SV=1; Elongation factor 1-alpha OS=Candida albicans P78042 GN=MGS_00808 PE=3 SV=1; Elongation factor 1-alpha OS=Can…			0	99	KLEENPKFVKSGDAAIVK	Deamidated(N)@5	missed K-L@1; missed K-F@7; missed K-S@10	-0.00572369	1973.08	494.277	1973.08	494.278	4	10	1.1.1.1695.7	1	13.8325	1685.96	13.737
1	93.17	93.17	63.97	63.97	63.97	tr|C4YDJ3|C4YDJ3_CANAW; tr|A0A0A6Q741|A0A0A6Q741_CANAL; tr|A0A0A6M7H0|A0A0A6M7H0_CANAL; tr|A0A0A6M386|A0A0A6M386_CANAX; tr|A0A0A6LGT0|A0A0A6LGT0_CANAX; tr|A0A0A6L5Y0|A0A0A6L5Y0_CANAX; tr|A0A0A6L1C0|A0A0A6L1C0_CANAX; tr|A0A0A6KWM0|A0A0A6KWM0_CANAX; tr|A0A0A6K9D4|A0A0A6K9D4_CANAX; tr|A0A0A6K455|A0A0A6K455_CANAX; tr|A0A0A6JWU4|A0A0A6JWU4_CANAX; tr|A0A0A6J9A0|A0A0A6J9A0_CANAX; tr|A0A0A6J199|A0A0A6J19…	Elongation factor 1-alpha OS=Candida albicans (strain WO-1) GN=CAWG_00588 PE=3 SV=1; Elongation factor 1-alpha OS=Candida albicans (strain SC5314 / ATCC MYA-2876) GN=I503_00814 PE=3 SV=1; Elongation factor 1-alpha OS=Candida albicans (strain SC5314 / ATCC MYA-2876) GN=W5Q_02251 PE=3 SV=1; Elongation factor 1-alpha OS=Candida albicans P78042 GN=MGS_00808 PE=3 SV=1; Elongation factor 1-alpha OS=Can…			0	15.22	KLEENPKFVKSGDAAIVK	Deamidated(N)@5	missed K-L@1; missed K-F@7; missed K-S@10	-0.00105067	1973.08	658.701	1973.08	658.702	3	7	1.1.1.1693.15	1	13.7659	479.019	13.737
1	93.17	93.17	63.97	63.97	63.97	tr|C4YDJ3|C4YDJ3_CANAW; tr|A0A0A6Q741|A0A0A6Q741_CANAL; tr|A0A0A6M7H0|A0A0A6M7H0_CANAL; tr|A0A0A6M386|A0A0A6M386_CANAX; tr|A0A0A6LGT0|A0A0A6LGT0_CANAX; tr|A0A0A6L5Y0|A0A0A6L5Y0_CANAX; tr|A0A0A6L1C0|A0A0A6L1C0_CANAX; tr|A0A0A6KWM0|A0A0A6KWM0_CANAX; tr|A0A0A6K9D4|A0A0A6K9D4_CANAX; tr|A0A0A6K455|A0A0A6K455_CANAX; tr|A0A0A6JWU4|A0A0A6JWU4_CANAX; tr|A0A0A6J9A0|A0A0A6J9A0_CANAX; tr|A0A0A6J199|A0A0A6J19…	Elongation factor 1-alpha OS=Candida albicans (strain WO-1) GN=CAWG_00588 PE=3 SV=1; Elongation factor 1-alpha OS=Candida albicans (strain SC5314 / ATCC MYA-2876) GN=I503_00814 PE=3 SV=1; Elongation factor 1-alpha OS=Candida albicans (strain SC5314 / ATCC MYA-2876) GN=W5Q_02251 PE=3 SV=1; Elongation factor 1-alpha OS=Candida albicans P78042 GN=MGS_00808 PE=3 SV=1; Elongation factor 1-alpha OS=Can…			0	95.72	LEENPKFVKSGDAAIVK		missed K-F@6; missed K-S@9	0.0142964	1844.02	462.012	1844	462.008	4	8	1.1.1.1701.3	1	14.0662	828.123	13.9369
1	93.17	93.17	63.97	63.97	63.97	tr|C4YDJ3|C4YDJ3_CANAW; tr|A0A0A6Q741|A0A0A6Q741_CANAL; tr|A0A0A6M7H0|A0A0A6M7H0_CANAL; tr|A0A0A6M386|A0A0A6M386_CANAX; tr|A0A0A6LGT0|A0A0A6LGT0_CANAX; tr|A0A0A6L5Y0|A0A0A6L5Y0_CANAX; tr|A0A0A6L1C0|A0A0A6L1C0_CANAX; tr|A0A0A6KWM0|A0A0A6KWM0_CANAX; tr|A0A0A6K9D4|A0A0A6K9D4_CANAX; tr|A0A0A6K455|A0A0A6K455_CANAX; tr|A0A0A6JWU4|A0A0A6JWU4_CANAX; tr|A0A0A6J9A0|A0A0A6J9A0_CANAX; tr|A0A0A6J199|A0A0A6J19…	Elongation factor 1-alpha OS=Candida albicans (strain WO-1) GN=CAWG_00588 PE=3 SV=1; Elongation factor 1-alpha OS=Candida albicans (strain SC5314 / ATCC MYA-2876) GN=I503_00814 PE=3 SV=1; Elongation factor 1-alpha OS=Candida albicans (strain SC5314 / ATCC MYA-2876) GN=W5Q_02251 PE=3 SV=1; Elongation factor 1-alpha OS=Candida albicans P78042 GN=MGS_00808 PE=3 SV=1; Elongation factor 1-alpha OS=Can…			0	99	MVPTKPMCVEAFTDYPPLGR	Oxidation(M)@1; Oxidation(M)@7; Carbamidomethyl(C)@8		0.00111497	2340.1	781.039	2340.1	781.039	3	16	1.1.1.1960.17	1	24.4405	21459.6	24.8096
1	93.17	93.17	63.97	63.97	63.97	tr|C4YDJ3|C4YDJ3_CANAW; tr|A0A0A6Q741|A0A0A6Q741_CANAL; tr|A0A0A6M7H0|A0A0A6M7H0_CANAL; tr|A0A0A6M386|A0A0A6M386_CANAX; tr|A0A0A6LGT0|A0A0A6LGT0_CANAX; tr|A0A0A6L5Y0|A0A0A6L5Y0_CANAX; tr|A0A0A6L1C0|A0A0A6L1C0_CANAX; tr|A0A0A6KWM0|A0A0A6KWM0_CANAX; tr|A0A0A6K9D4|A0A0A6K9D4_CANAX; tr|A0A0A6K455|A0A0A6K455_CANAX; tr|A0A0A6JWU4|A0A0A6JWU4_CANAX; tr|A0A0A6J9A0|A0A0A6J9A0_CANAX; tr|A0A0A6J199|A0A0A6J19…	Elongation factor 1-alpha OS=Candida albicans (strain WO-1) GN=CAWG_00588 PE=3 SV=1; Elongation factor 1-alpha OS=Candida albicans (strain SC5314 / ATCC MYA-2876) GN=I503_00814 PE=3 SV=1; Elongation factor 1-alpha OS=Candida albicans (strain SC5314 / ATCC MYA-2876) GN=W5Q_02251 PE=3 SV=1; Elongation factor 1-alpha OS=Candida albicans P78042 GN=MGS_00808 PE=3 SV=1; Elongation factor 1-alpha OS=Can…			0	99	MVPTKPMCVEAFTDYPPLGR	Oxidation(M)@1; Oxidation(M)@7; Carbamidomethyl(C)@8		0.00111497	2340.1	781.039	2340.1	781.039	3	20	1.1.1.1963.19	1	24.5643	24314.1	24.8498
1	93.17	93.17	63.97	63.97	63.97	tr|C4YDJ3|C4YDJ3_CANAW; tr|A0A0A6Q741|A0A0A6Q741_CANAL; tr|A0A0A6M7H0|A0A0A6M7H0_CANAL; tr|A0A0A6M386|A0A0A6M386_CANAX; tr|A0A0A6LGT0|A0A0A6LGT0_CANAX; tr|A0A0A6L5Y0|A0A0A6L5Y0_CANAX; tr|A0A0A6L1C0|A0A0A6L1C0_CANAX; tr|A0A0A6KWM0|A0A0A6KWM0_CANAX; tr|A0A0A6K9D4|A0A0A6K9D4_CANAX; tr|A0A0A6K455|A0A0A6K455_CANAX; tr|A0A0A6JWU4|A0A0A6JWU4_CANAX; tr|A0A0A6J9A0|A0A0A6J9A0_CANAX; tr|A0A0A6J199|A0A0A6J19…	Elongation factor 1-alpha OS=Candida albicans (strain WO-1) GN=CAWG_00588 PE=3 SV=1; Elongation factor 1-alpha OS=Candida albicans (strain SC5314 / ATCC MYA-2876) GN=I503_00814 PE=3 SV=1; Elongation factor 1-alpha OS=Candida albicans (strain SC5314 / ATCC MYA-2876) GN=W5Q_02251 PE=3 SV=1; Elongation factor 1-alpha OS=Candida albicans P78042 GN=MGS_00808 PE=3 SV=1; Elongation factor 1-alpha OS=Can…			0	99	MVPTKPMCVEAFTDYPPLGR	Oxidation(M)@1; Oxidation(M)@7; Carbamidomethyl(C)@8		0.00111497	2340.1	781.039	2340.1	781.039	3	25	1.1.1.1966.17	1	24.6815	24538.4	24.8498
1	93.17	93.17	63.97	63.97	63.97	tr|C4YDJ3|C4YDJ3_CANAW; tr|A0A0A6Q741|A0A0A6Q741_CANAL; tr|A0A0A6M7H0|A0A0A6M7H0_CANAL; tr|A0A0A6M386|A0A0A6M386_CANAX; tr|A0A0A6LGT0|A0A0A6LGT0_CANAX; tr|A0A0A6L5Y0|A0A0A6L5Y0_CANAX; tr|A0A0A6L1C0|A0A0A6L1C0_CANAX; tr|A0A0A6KWM0|A0A0A6KWM0_CANAX; tr|A0A0A6K9D4|A0A0A6K9D4_CANAX; tr|A0A0A6K455|A0A0A6K455_CANAX; tr|A0A0A6JWU4|A0A0A6JWU4_CANAX; tr|A0A0A6J9A0|A0A0A6J9A0_CANAX; tr|A0A0A6J199|A0A0A6J19…	Elongation factor 1-alpha OS=Candida albicans (strain WO-1) GN=CAWG_00588 PE=3 SV=1; Elongation factor 1-alpha OS=Candida albicans (strain SC5314 / ATCC MYA-2876) GN=I503_00814 PE=3 SV=1; Elongation factor 1-alpha OS=Candida albicans (strain SC5314 / ATCC MYA-2876) GN=W5Q_02251 PE=3 SV=1; Elongation factor 1-alpha OS=Candida albicans P78042 GN=MGS_00808 PE=3 SV=1; Elongation factor 1-alpha OS=Can…			0	99	MVPTKPMCVEAFTDYPPLGR	Oxidation(M)@1; Oxidation(M)@7; Carbamidomethyl(C)@8		0.00111497	2340.1	781.039	2340.1	781.039	3	25	1.1.1.1969.17	1	24.8019	24538.4	24.8498
1	93.17	93.17	63.97	63.97	63.97	tr|C4YDJ3|C4YDJ3_CANAW; tr|A0A0A6Q741|A0A0A6Q741_CANAL; tr|A0A0A6M7H0|A0A0A6M7H0_CANAL; tr|A0A0A6M386|A0A0A6M386_CANAX; tr|A0A0A6LGT0|A0A0A6LGT0_CANAX; tr|A0A0A6L5Y0|A0A0A6L5Y0_CANAX; tr|A0A0A6L1C0|A0A0A6L1C0_CANAX; tr|A0A0A6KWM0|A0A0A6KWM0_CANAX; tr|A0A0A6K9D4|A0A0A6K9D4_CANAX; tr|A0A0A6K455|A0A0A6K455_CANAX; tr|A0A0A6JWU4|A0A0A6JWU4_CANAX; tr|A0A0A6J9A0|A0A0A6J9A0_CANAX; tr|A0A0A6J199|A0A0A6J19…	Elongation factor 1-alpha OS=Candida albicans (strain WO-1) GN=CAWG_00588 PE=3 SV=1; Elongation factor 1-alpha OS=Candida albicans (strain SC5314 / ATCC MYA-2876) GN=I503_00814 PE=3 SV=1; Elongation factor 1-alpha OS=Candida albicans (strain SC5314 / ATCC MYA-2876) GN=W5Q_02251 PE=3 SV=1; Elongation factor 1-alpha OS=Candida albicans P78042 GN=MGS_00808 PE=3 SV=1; Elongation factor 1-alpha OS=Can…			0	99	MVPTKPMCVEAFTDYPPLGR	Oxidation(M)@1; Oxidation(M)@7; Carbamidomethyl(C)@8		0.00111497	2340.1	781.039	2340.1	781.039	3	24	1.1.1.1972.19	1	24.9256	24538.4	24.8498
1	93.17	93.17	63.97	63.97	63.97	tr|C4YDJ3|C4YDJ3_CANAW; tr|A0A0A6Q741|A0A0A6Q741_CANAL; tr|A0A0A6M7H0|A0A0A6M7H0_CANAL; tr|A0A0A6M386|A0A0A6M386_CANAX; tr|A0A0A6LGT0|A0A0A6LGT0_CANAX; tr|A0A0A6L5Y0|A0A0A6L5Y0_CANAX; tr|A0A0A6L1C0|A0A0A6L1C0_CANAX; tr|A0A0A6KWM0|A0A0A6KWM0_CANAX; tr|A0A0A6K9D4|A0A0A6K9D4_CANAX; tr|A0A0A6K455|A0A0A6K455_CANAX; tr|A0A0A6JWU4|A0A0A6JWU4_CANAX; tr|A0A0A6J9A0|A0A0A6J9A0_CANAX; tr|A0A0A6J199|A0A0A6J19…	Elongation factor 1-alpha OS=Candida albicans (strain WO-1) GN=CAWG_00588 PE=3 SV=1; Elongation factor 1-alpha OS=Candida albicans (strain SC5314 / ATCC MYA-2876) GN=I503_00814 PE=3 SV=1; Elongation factor 1-alpha OS=Candida albicans (strain SC5314 / ATCC MYA-2876) GN=W5Q_02251 PE=3 SV=1; Elongation factor 1-alpha OS=Candida albicans P78042 GN=MGS_00808 PE=3 SV=1; Elongation factor 1-alpha OS=Can…			0	99	MVPTKPMCVEAFTDYPPLGR	Oxidation(M)@1; Oxidation(M)@7; Carbamidomethyl(C)@8		0.00111497	2340.1	781.039	2340.1	781.039	3	24	1.1.1.1975.18	1	25.0442	24538.4	24.8498
1	93.17	93.17	63.97	63.97	63.97	tr|C4YDJ3|C4YDJ3_CANAW; tr|A0A0A6Q741|A0A0A6Q741_CANAL; tr|A0A0A6M7H0|A0A0A6M7H0_CANAL; tr|A0A0A6M386|A0A0A6M386_CANAX; tr|A0A0A6LGT0|A0A0A6LGT0_CANAX; tr|A0A0A6L5Y0|A0A0A6L5Y0_CANAX; tr|A0A0A6L1C0|A0A0A6L1C0_CANAX; tr|A0A0A6KWM0|A0A0A6KWM0_CANAX; tr|A0A0A6K9D4|A0A0A6K9D4_CANAX; tr|A0A0A6K455|A0A0A6K455_CANAX; tr|A0A0A6JWU4|A0A0A6JWU4_CANAX; tr|A0A0A6J9A0|A0A0A6J9A0_CANAX; tr|A0A0A6J199|A0A0A6J19…	Elongation factor 1-alpha OS=Candida albicans (strain WO-1) GN=CAWG_00588 PE=3 SV=1; Elongation factor 1-alpha OS=Candida albicans (strain SC5314 / ATCC MYA-2876) GN=I503_00814 PE=3 SV=1; Elongation factor 1-alpha OS=Candida albicans (strain SC5314 / ATCC MYA-2876) GN=W5Q_02251 PE=3 SV=1; Elongation factor 1-alpha OS=Candida albicans P78042 GN=MGS_00808 PE=3 SV=1; Elongation factor 1-alpha OS=Can…			0	99	MVPTKPMCVEAFTDYPPLGR	Oxidation(M)@1; Oxidation(M)@7; Carbamidomethyl(C)@8		0.00111497	2340.1	781.039	2340.1	781.039	3	21	1.1.1.1978.15	1	25.1592	24538.4	24.8498
1	93.17	93.17	63.97	63.97	63.97	tr|C4YDJ3|C4YDJ3_CANAW; tr|A0A0A6Q741|A0A0A6Q741_CANAL; tr|A0A0A6M7H0|A0A0A6M7H0_CANAL; tr|A0A0A6M386|A0A0A6M386_CANAX; tr|A0A0A6LGT0|A0A0A6LGT0_CANAX; tr|A0A0A6L5Y0|A0A0A6L5Y0_CANAX; tr|A0A0A6L1C0|A0A0A6L1C0_CANAX; tr|A0A0A6KWM0|A0A0A6KWM0_CANAX; tr|A0A0A6K9D4|A0A0A6K9D4_CANAX; tr|A0A0A6K455|A0A0A6K455_CANAX; tr|A0A0A6JWU4|A0A0A6JWU4_CANAX; tr|A0A0A6J9A0|A0A0A6J9A0_CANAX; tr|A0A0A6J199|A0A0A6J19…	Elongation factor 1-alpha OS=Candida albicans (strain WO-1) GN=CAWG_00588 PE=3 SV=1; Elongation factor 1-alpha OS=Candida albicans (strain SC5314 / ATCC MYA-2876) GN=I503_00814 PE=3 SV=1; Elongation factor 1-alpha OS=Candida albicans (strain SC5314 / ATCC MYA-2876) GN=W5Q_02251 PE=3 SV=1; Elongation factor 1-alpha OS=Candida albicans P78042 GN=MGS_00808 PE=3 SV=1; Elongation factor 1-alpha OS=Can…			0	99	MVPTKPMCVEAFTDYPPLGR	Oxidation(M)@1; Oxidation(M)@7; Carbamidomethyl(C)@8		0.00111497	2340.1	781.039	2340.1	781.039	3	23	1.1.1.1981.17	1	25.2825	24777.9	24.8498
1	93.17	93.17	63.97	63.97	63.97	tr|C4YDJ3|C4YDJ3_CANAW; tr|A0A0A6Q741|A0A0A6Q741_CANAL; tr|A0A0A6M7H0|A0A0A6M7H0_CANAL; tr|A0A0A6M386|A0A0A6M386_CANAX; tr|A0A0A6LGT0|A0A0A6LGT0_CANAX; tr|A0A0A6L5Y0|A0A0A6L5Y0_CANAX; tr|A0A0A6L1C0|A0A0A6L1C0_CANAX; tr|A0A0A6KWM0|A0A0A6KWM0_CANAX; tr|A0A0A6K9D4|A0A0A6K9D4_CANAX; tr|A0A0A6K455|A0A0A6K455_CANAX; tr|A0A0A6JWU4|A0A0A6JWU4_CANAX; tr|A0A0A6J9A0|A0A0A6J9A0_CANAX; tr|A0A0A6J199|A0A0A6J19…	Elongation factor 1-alpha OS=Candida albicans (strain WO-1) GN=CAWG_00588 PE=3 SV=1; Elongation factor 1-alpha OS=Candida albicans (strain SC5314 / ATCC MYA-2876) GN=I503_00814 PE=3 SV=1; Elongation factor 1-alpha OS=Candida albicans (strain SC5314 / ATCC MYA-2876) GN=W5Q_02251 PE=3 SV=1; Elongation factor 1-alpha OS=Candida albicans P78042 GN=MGS_00808 PE=3 SV=1; Elongation factor 1-alpha OS=Can…			0	99	MVPTKPMCVEAFTDYPPLGR	Oxidation(M)@1; Oxidation(M)@7; Carbamidomethyl(C)@8		0.000748774	2340.1	781.039	2340.1	781.039	3	21	1.1.1.1987.17	1	25.5233	18952.9	25.0902
1	93.17	93.17	63.97	63.97	63.97	tr|C4YDJ3|C4YDJ3_CANAW; tr|A0A0A6Q741|A0A0A6Q741_CANAL; tr|A0A0A6M7H0|A0A0A6M7H0_CANAL; tr|A0A0A6M386|A0A0A6M386_CANAX; tr|A0A0A6LGT0|A0A0A6LGT0_CANAX; tr|A0A0A6L5Y0|A0A0A6L5Y0_CANAX; tr|A0A0A6L1C0|A0A0A6L1C0_CANAX; tr|A0A0A6KWM0|A0A0A6KWM0_CANAX; tr|A0A0A6K9D4|A0A0A6K9D4_CANAX; tr|A0A0A6K455|A0A0A6K455_CANAX; tr|A0A0A6JWU4|A0A0A6JWU4_CANAX; tr|A0A0A6J9A0|A0A0A6J9A0_CANAX; tr|A0A0A6J199|A0A0A6J19…	Elongation factor 1-alpha OS=Candida albicans (strain WO-1) GN=CAWG_00588 PE=3 SV=1; Elongation factor 1-alpha OS=Candida albicans (strain SC5314 / ATCC MYA-2876) GN=I503_00814 PE=3 SV=1; Elongation factor 1-alpha OS=Candida albicans (strain SC5314 / ATCC MYA-2876) GN=W5Q_02251 PE=3 SV=1; Elongation factor 1-alpha OS=Candida albicans P78042 GN=MGS_00808 PE=3 SV=1; Elongation factor 1-alpha OS=Can…			0	99	MVPTKPMCVEAFTDYPPLGR	Oxidation(M)@1; Oxidation(M)@7; Carbamidomethyl(C)@8		0.000748774	2340.1	781.039	2340.1	781.039	3	17	1.1.1.1992.18	1	25.7259	11294.1	25.2903
1	93.17	93.17	63.97	63.97	63.97	tr|C4YDJ3|C4YDJ3_CANAW; tr|A0A0A6Q741|A0A0A6Q741_CANAL; tr|A0A0A6M7H0|A0A0A6M7H0_CANAL; tr|A0A0A6M386|A0A0A6M386_CANAX; tr|A0A0A6LGT0|A0A0A6LGT0_CANAX; tr|A0A0A6L5Y0|A0A0A6L5Y0_CANAX; tr|A0A0A6L1C0|A0A0A6L1C0_CANAX; tr|A0A0A6KWM0|A0A0A6KWM0_CANAX; tr|A0A0A6K9D4|A0A0A6K9D4_CANAX; tr|A0A0A6K455|A0A0A6K455_CANAX; tr|A0A0A6JWU4|A0A0A6JWU4_CANAX; tr|A0A0A6J9A0|A0A0A6J9A0_CANAX; tr|A0A0A6J199|A0A0A6J19…	Elongation factor 1-alpha OS=Candida albicans (strain WO-1) GN=CAWG_00588 PE=3 SV=1; Elongation factor 1-alpha OS=Candida albicans (strain SC5314 / ATCC MYA-2876) GN=I503_00814 PE=3 SV=1; Elongation factor 1-alpha OS=Candida albicans (strain SC5314 / ATCC MYA-2876) GN=W5Q_02251 PE=3 SV=1; Elongation factor 1-alpha OS=Candida albicans P78042 GN=MGS_00808 PE=3 SV=1; Elongation factor 1-alpha OS=Can…			0	99	MVPTKPMCVEAFTDYPPLGR	Oxidation(M)@1; Oxidation(M)@7; Carbamidomethyl(C)@8		0.00129807	2340.1	781.039	2340.1	781.039	3	16	1.1.1.1996.16	1	25.8829	6632.41	25.4507
1	93.17	93.17	63.97	63.97	63.97	tr|C4YDJ3|C4YDJ3_CANAW; tr|A0A0A6Q741|A0A0A6Q741_CANAL; tr|A0A0A6M7H0|A0A0A6M7H0_CANAL; tr|A0A0A6M386|A0A0A6M386_CANAX; tr|A0A0A6LGT0|A0A0A6LGT0_CANAX; tr|A0A0A6L5Y0|A0A0A6L5Y0_CANAX; tr|A0A0A6L1C0|A0A0A6L1C0_CANAX; tr|A0A0A6KWM0|A0A0A6KWM0_CANAX; tr|A0A0A6K9D4|A0A0A6K9D4_CANAX; tr|A0A0A6K455|A0A0A6K455_CANAX; tr|A0A0A6JWU4|A0A0A6JWU4_CANAX; tr|A0A0A6J9A0|A0A0A6J9A0_CANAX; tr|A0A0A6J199|A0A0A6J19…	Elongation factor 1-alpha OS=Candida albicans (strain WO-1) GN=CAWG_00588 PE=3 SV=1; Elongation factor 1-alpha OS=Candida albicans (strain SC5314 / ATCC MYA-2876) GN=I503_00814 PE=3 SV=1; Elongation factor 1-alpha OS=Candida albicans (strain SC5314 / ATCC MYA-2876) GN=W5Q_02251 PE=3 SV=1; Elongation factor 1-alpha OS=Candida albicans P78042 GN=MGS_00808 PE=3 SV=1; Elongation factor 1-alpha OS=Can…			0	99	MVPTKPMCVEAFTDYPPLGR	Dethiomethyl(M)@1; Oxidation(P)@3; Phospho(T)@4; Carbamidomethyl(C)@8		0.0275712	2356.09	786.371	2356.06	786.362	3	14	1.1.1.1958.18	1	24.3622	2655.24	24.248
1	93.17	93.17	63.97	63.97	63.97	tr|C4YDJ3|C4YDJ3_CANAW; tr|A0A0A6Q741|A0A0A6Q741_CANAL; tr|A0A0A6M7H0|A0A0A6M7H0_CANAL; tr|A0A0A6M386|A0A0A6M386_CANAX; tr|A0A0A6LGT0|A0A0A6LGT0_CANAX; tr|A0A0A6L5Y0|A0A0A6L5Y0_CANAX; tr|A0A0A6L1C0|A0A0A6L1C0_CANAX; tr|A0A0A6KWM0|A0A0A6KWM0_CANAX; tr|A0A0A6K9D4|A0A0A6K9D4_CANAX; tr|A0A0A6K455|A0A0A6K455_CANAX; tr|A0A0A6JWU4|A0A0A6JWU4_CANAX; tr|A0A0A6J9A0|A0A0A6J9A0_CANAX; tr|A0A0A6J199|A0A0A6J19…	Elongation factor 1-alpha OS=Candida albicans (strain WO-1) GN=CAWG_00588 PE=3 SV=1; Elongation factor 1-alpha OS=Candida albicans (strain SC5314 / ATCC MYA-2876) GN=I503_00814 PE=3 SV=1; Elongation factor 1-alpha OS=Candida albicans (strain SC5314 / ATCC MYA-2876) GN=W5Q_02251 PE=3 SV=1; Elongation factor 1-alpha OS=Candida albicans P78042 GN=MGS_00808 PE=3 SV=1; Elongation factor 1-alpha OS=Can…			0	99	MVPTKPMCVEAFTDYPPLGR	Oxidation(M)@1; Dioxidation(M)@7; Carbamidomethyl(C)@8		0.000701574	2356.09	786.371	2356.09	786.371	3	13	1.1.1.1962.19	1	24.5241	2655.24	24.248
1	93.17	93.17	63.97	63.97	63.97	tr|C4YDJ3|C4YDJ3_CANAW; tr|A0A0A6Q741|A0A0A6Q741_CANAL; tr|A0A0A6M7H0|A0A0A6M7H0_CANAL; tr|A0A0A6M386|A0A0A6M386_CANAX; tr|A0A0A6LGT0|A0A0A6LGT0_CANAX; tr|A0A0A6L5Y0|A0A0A6L5Y0_CANAX; tr|A0A0A6L1C0|A0A0A6L1C0_CANAX; tr|A0A0A6KWM0|A0A0A6KWM0_CANAX; tr|A0A0A6K9D4|A0A0A6K9D4_CANAX; tr|A0A0A6K455|A0A0A6K455_CANAX; tr|A0A0A6JWU4|A0A0A6JWU4_CANAX; tr|A0A0A6J9A0|A0A0A6J9A0_CANAX; tr|A0A0A6J199|A0A0A6J19…	Elongation factor 1-alpha OS=Candida albicans (strain WO-1) GN=CAWG_00588 PE=3 SV=1; Elongation factor 1-alpha OS=Candida albicans (strain SC5314 / ATCC MYA-2876) GN=I503_00814 PE=3 SV=1; Elongation factor 1-alpha OS=Candida albicans (strain SC5314 / ATCC MYA-2876) GN=W5Q_02251 PE=3 SV=1; Elongation factor 1-alpha OS=Candida albicans P78042 GN=MGS_00808 PE=3 SV=1; Elongation factor 1-alpha OS=Can…			0	99	MVPTKPMCVEAFTDYPPLGR	Oxidation(M)@1; Dioxidation(M)@7; Carbamidomethyl(C)@8		0.000434905	2356.09	786.371	2356.09	786.371	3	14	1.1.1.1955.17	1	24.2403	2677.91	24.248
1	93.17	93.17	63.97	63.97	63.97	tr|C4YDJ3|C4YDJ3_CANAW; tr|A0A0A6Q741|A0A0A6Q741_CANAL; tr|A0A0A6M7H0|A0A0A6M7H0_CANAL; tr|A0A0A6M386|A0A0A6M386_CANAX; tr|A0A0A6LGT0|A0A0A6LGT0_CANAX; tr|A0A0A6L5Y0|A0A0A6L5Y0_CANAX; tr|A0A0A6L1C0|A0A0A6L1C0_CANAX; tr|A0A0A6KWM0|A0A0A6KWM0_CANAX; tr|A0A0A6K9D4|A0A0A6K9D4_CANAX; tr|A0A0A6K455|A0A0A6K455_CANAX; tr|A0A0A6JWU4|A0A0A6JWU4_CANAX; tr|A0A0A6J9A0|A0A0A6J9A0_CANAX; tr|A0A0A6J199|A0A0A6J19…	Elongation factor 1-alpha OS=Candida albicans (strain WO-1) GN=CAWG_00588 PE=3 SV=1; Elongation factor 1-alpha OS=Candida albicans (strain SC5314 / ATCC MYA-2876) GN=I503_00814 PE=3 SV=1; Elongation factor 1-alpha OS=Candida albicans (strain SC5314 / ATCC MYA-2876) GN=W5Q_02251 PE=3 SV=1; Elongation factor 1-alpha OS=Candida albicans P78042 GN=MGS_00808 PE=3 SV=1; Elongation factor 1-alpha OS=Can…			0	99	MVPTKPMCVEAFTDYPPLGR	Oxidation(M)@1; Oxidation(P)@3; Oxidation(P)@6; Carbamidomethyl(C)@8		0.000434905	2356.09	786.371	2356.09	786.371	3	13	1.1.1.1952.18	1	24.1218	2677.91	24.248
1	93.17	93.17	63.97	63.97	63.97	tr|C4YDJ3|C4YDJ3_CANAW; tr|A0A0A6Q741|A0A0A6Q741_CANAL; tr|A0A0A6M7H0|A0A0A6M7H0_CANAL; tr|A0A0A6M386|A0A0A6M386_CANAX; tr|A0A0A6LGT0|A0A0A6LGT0_CANAX; tr|A0A0A6L5Y0|A0A0A6L5Y0_CANAX; tr|A0A0A6L1C0|A0A0A6L1C0_CANAX; tr|A0A0A6KWM0|A0A0A6KWM0_CANAX; tr|A0A0A6K9D4|A0A0A6K9D4_CANAX; tr|A0A0A6K455|A0A0A6K455_CANAX; tr|A0A0A6JWU4|A0A0A6JWU4_CANAX; tr|A0A0A6J9A0|A0A0A6J9A0_CANAX; tr|A0A0A6J199|A0A0A6J19…	Elongation factor 1-alpha OS=Candida albicans (strain WO-1) GN=CAWG_00588 PE=3 SV=1; Elongation factor 1-alpha OS=Candida albicans (strain SC5314 / ATCC MYA-2876) GN=I503_00814 PE=3 SV=1; Elongation factor 1-alpha OS=Candida albicans (strain SC5314 / ATCC MYA-2876) GN=W5Q_02251 PE=3 SV=1; Elongation factor 1-alpha OS=Candida albicans P78042 GN=MGS_00808 PE=3 SV=1; Elongation factor 1-alpha OS=Can…			0	98.77	MVPTKPMCVEAFTDYPPLGR	Oxidation(M)@1; Oxidation(P)@6; Oxidation(M)@7; Carbamidomethyl(C)@8		0.000984204	2356.09	786.371	2356.09	786.371	3	12	1.1.1.1946.17	1	23.8796	2702.53	23.8472
1	93.17	93.17	63.97	63.97	63.97	tr|C4YDJ3|C4YDJ3_CANAW; tr|A0A0A6Q741|A0A0A6Q741_CANAL; tr|A0A0A6M7H0|A0A0A6M7H0_CANAL; tr|A0A0A6M386|A0A0A6M386_CANAX; tr|A0A0A6LGT0|A0A0A6LGT0_CANAX; tr|A0A0A6L5Y0|A0A0A6L5Y0_CANAX; tr|A0A0A6L1C0|A0A0A6L1C0_CANAX; tr|A0A0A6KWM0|A0A0A6KWM0_CANAX; tr|A0A0A6K9D4|A0A0A6K9D4_CANAX; tr|A0A0A6K455|A0A0A6K455_CANAX; tr|A0A0A6JWU4|A0A0A6JWU4_CANAX; tr|A0A0A6J9A0|A0A0A6J9A0_CANAX; tr|A0A0A6J199|A0A0A6J19…	Elongation factor 1-alpha OS=Candida albicans (strain WO-1) GN=CAWG_00588 PE=3 SV=1; Elongation factor 1-alpha OS=Candida albicans (strain SC5314 / ATCC MYA-2876) GN=I503_00814 PE=3 SV=1; Elongation factor 1-alpha OS=Candida albicans (strain SC5314 / ATCC MYA-2876) GN=W5Q_02251 PE=3 SV=1; Elongation factor 1-alpha OS=Candida albicans P78042 GN=MGS_00808 PE=3 SV=1; Elongation factor 1-alpha OS=Can…			0	98.77	MVPTKPMCVEAFTDYPPLGR	Oxidation(M)@1; Dioxidation(M)@7; Carbamidomethyl(C)@8		0.000984204	2356.09	786.371	2356.09	786.371	3	12	1.1.1.1949.19	1	24.0034	2702.53	23.8472
1	93.17	93.17	63.97	63.97	63.97	tr|C4YDJ3|C4YDJ3_CANAW; tr|A0A0A6Q741|A0A0A6Q741_CANAL; tr|A0A0A6M7H0|A0A0A6M7H0_CANAL; tr|A0A0A6M386|A0A0A6M386_CANAX; tr|A0A0A6LGT0|A0A0A6LGT0_CANAX; tr|A0A0A6L5Y0|A0A0A6L5Y0_CANAX; tr|A0A0A6L1C0|A0A0A6L1C0_CANAX; tr|A0A0A6KWM0|A0A0A6KWM0_CANAX; tr|A0A0A6K9D4|A0A0A6K9D4_CANAX; tr|A0A0A6K455|A0A0A6K455_CANAX; tr|A0A0A6JWU4|A0A0A6JWU4_CANAX; tr|A0A0A6J9A0|A0A0A6J9A0_CANAX; tr|A0A0A6J199|A0A0A6J19…	Elongation factor 1-alpha OS=Candida albicans (strain WO-1) GN=CAWG_00588 PE=3 SV=1; Elongation factor 1-alpha OS=Candida albicans (strain SC5314 / ATCC MYA-2876) GN=I503_00814 PE=3 SV=1; Elongation factor 1-alpha OS=Candida albicans (strain SC5314 / ATCC MYA-2876) GN=W5Q_02251 PE=3 SV=1; Elongation factor 1-alpha OS=Candida albicans P78042 GN=MGS_00808 PE=3 SV=1; Elongation factor 1-alpha OS=Can…			0	96.27	MVPTKPMCVEAFTDYPPLGR	Oxidation(M)@1; Oxidation(M)@7; Carbamidomethyl(C)@8		0.00328809	2340.1	586.032	2340.1	586.031	4	10	1.1.1.1972.7	1	24.9056	1200.63	24.8498
1	93.17	93.17	63.97	63.97	63.97	tr|C4YDJ3|C4YDJ3_CANAW; tr|A0A0A6Q741|A0A0A6Q741_CANAL; tr|A0A0A6M7H0|A0A0A6M7H0_CANAL; tr|A0A0A6M386|A0A0A6M386_CANAX; tr|A0A0A6LGT0|A0A0A6LGT0_CANAX; tr|A0A0A6L5Y0|A0A0A6L5Y0_CANAX; tr|A0A0A6L1C0|A0A0A6L1C0_CANAX; tr|A0A0A6KWM0|A0A0A6KWM0_CANAX; tr|A0A0A6K9D4|A0A0A6K9D4_CANAX; tr|A0A0A6K455|A0A0A6K455_CANAX; tr|A0A0A6JWU4|A0A0A6JWU4_CANAX; tr|A0A0A6J9A0|A0A0A6J9A0_CANAX; tr|A0A0A6J199|A0A0A6J19…	Elongation factor 1-alpha OS=Candida albicans (strain WO-1) GN=CAWG_00588 PE=3 SV=1; Elongation factor 1-alpha OS=Candida albicans (strain SC5314 / ATCC MYA-2876) GN=I503_00814 PE=3 SV=1; Elongation factor 1-alpha OS=Candida albicans (strain SC5314 / ATCC MYA-2876) GN=W5Q_02251 PE=3 SV=1; Elongation factor 1-alpha OS=Candida albicans P78042 GN=MGS_00808 PE=3 SV=1; Elongation factor 1-alpha OS=Can…			0	99	MVPTKPMCVEAFTDYPPLGRFAVR	Oxidation(M)@1; Oxidation(M)@7; Carbamidomethyl(C)@8	missed R-F@20	0.00581638	2813.38	704.351	2813.37	704.35	4	13	1.1.1.2059.12	1	28.4071	1378.41	28.4232
1	93.17	93.17	63.97	63.97	63.97	tr|C4YDJ3|C4YDJ3_CANAW; tr|A0A0A6Q741|A0A0A6Q741_CANAL; tr|A0A0A6M7H0|A0A0A6M7H0_CANAL; tr|A0A0A6M386|A0A0A6M386_CANAX; tr|A0A0A6LGT0|A0A0A6LGT0_CANAX; tr|A0A0A6L5Y0|A0A0A6L5Y0_CANAX; tr|A0A0A6L1C0|A0A0A6L1C0_CANAX; tr|A0A0A6KWM0|A0A0A6KWM0_CANAX; tr|A0A0A6K9D4|A0A0A6K9D4_CANAX; tr|A0A0A6K455|A0A0A6K455_CANAX; tr|A0A0A6JWU4|A0A0A6JWU4_CANAX; tr|A0A0A6J9A0|A0A0A6J9A0_CANAX; tr|A0A0A6J199|A0A0A6J19…	Elongation factor 1-alpha OS=Candida albicans (strain WO-1) GN=CAWG_00588 PE=3 SV=1; Elongation factor 1-alpha OS=Candida albicans (strain SC5314 / ATCC MYA-2876) GN=I503_00814 PE=3 SV=1; Elongation factor 1-alpha OS=Candida albicans (strain SC5314 / ATCC MYA-2876) GN=W5Q_02251 PE=3 SV=1; Elongation factor 1-alpha OS=Candida albicans P78042 GN=MGS_00808 PE=3 SV=1; Elongation factor 1-alpha OS=Can…			0	22.28	MVPTKPMCVEAFTDYPPLGRFAVR	Oxidation(M)@1; Oxidation(M)@7; Carbamidomethyl(C)@8	missed R-F@20	0.00581638	2813.38	704.351	2813.37	704.35	4	8	1.1.1.2056.15	1	28.2915	1378.41	28.4232
1	93.17	93.17	63.97	63.97	63.97	tr|C4YDJ3|C4YDJ3_CANAW; tr|A0A0A6Q741|A0A0A6Q741_CANAL; tr|A0A0A6M7H0|A0A0A6M7H0_CANAL; tr|A0A0A6M386|A0A0A6M386_CANAX; tr|A0A0A6LGT0|A0A0A6LGT0_CANAX; tr|A0A0A6L5Y0|A0A0A6L5Y0_CANAX; tr|A0A0A6L1C0|A0A0A6L1C0_CANAX; tr|A0A0A6KWM0|A0A0A6KWM0_CANAX; tr|A0A0A6K9D4|A0A0A6K9D4_CANAX; tr|A0A0A6K455|A0A0A6K455_CANAX; tr|A0A0A6JWU4|A0A0A6JWU4_CANAX; tr|A0A0A6J9A0|A0A0A6J9A0_CANAX; tr|A0A0A6J199|A0A0A6J19…	Elongation factor 1-alpha OS=Candida albicans (strain WO-1) GN=CAWG_00588 PE=3 SV=1; Elongation factor 1-alpha OS=Candida albicans (strain SC5314 / ATCC MYA-2876) GN=I503_00814 PE=3 SV=1; Elongation factor 1-alpha OS=Candida albicans (strain SC5314 / ATCC MYA-2876) GN=W5Q_02251 PE=3 SV=1; Elongation factor 1-alpha OS=Candida albicans P78042 GN=MGS_00808 PE=3 SV=1; Elongation factor 1-alpha OS=Can…			0	98.77	QLAEGVPGDNVGFNVK		cleaved E-Q@N-term	-0.00358311	1642.83	822.421	1642.83	822.423	2	11	1.1.1.1916.15	1	22.681	1001.51	22.6921
1	93.17	93.17	63.97	63.97	63.97	tr|C4YDJ3|C4YDJ3_CANAW; tr|A0A0A6Q741|A0A0A6Q741_CANAL; tr|A0A0A6M7H0|A0A0A6M7H0_CANAL; tr|A0A0A6M386|A0A0A6M386_CANAX; tr|A0A0A6LGT0|A0A0A6LGT0_CANAX; tr|A0A0A6L5Y0|A0A0A6L5Y0_CANAX; tr|A0A0A6L1C0|A0A0A6L1C0_CANAX; tr|A0A0A6KWM0|A0A0A6KWM0_CANAX; tr|A0A0A6K9D4|A0A0A6K9D4_CANAX; tr|A0A0A6K455|A0A0A6K455_CANAX; tr|A0A0A6JWU4|A0A0A6JWU4_CANAX; tr|A0A0A6J9A0|A0A0A6J9A0_CANAX; tr|A0A0A6J199|A0A0A6J19…	Elongation factor 1-alpha OS=Candida albicans (strain WO-1) GN=CAWG_00588 PE=3 SV=1; Elongation factor 1-alpha OS=Candida albicans (strain SC5314 / ATCC MYA-2876) GN=I503_00814 PE=3 SV=1; Elongation factor 1-alpha OS=Candida albicans (strain SC5314 / ATCC MYA-2876) GN=W5Q_02251 PE=3 SV=1; Elongation factor 1-alpha OS=Candida albicans P78042 GN=MGS_00808 PE=3 SV=1; Elongation factor 1-alpha OS=Can…			0	99	QTVAVGVIKSVEK	Gln->pyro-Glu@N-term	missed K-S@9	0.000974615	1339.77	670.893	1339.77	670.893	2	17	1.1.1.1965.10	1	24.6298	3111.09	24.7695
1	93.17	93.17	63.97	63.97	63.97	tr|C4YDJ3|C4YDJ3_CANAW; tr|A0A0A6Q741|A0A0A6Q741_CANAL; tr|A0A0A6M7H0|A0A0A6M7H0_CANAL; tr|A0A0A6M386|A0A0A6M386_CANAX; tr|A0A0A6LGT0|A0A0A6LGT0_CANAX; tr|A0A0A6L5Y0|A0A0A6L5Y0_CANAX; tr|A0A0A6L1C0|A0A0A6L1C0_CANAX; tr|A0A0A6KWM0|A0A0A6KWM0_CANAX; tr|A0A0A6K9D4|A0A0A6K9D4_CANAX; tr|A0A0A6K455|A0A0A6K455_CANAX; tr|A0A0A6JWU4|A0A0A6JWU4_CANAX; tr|A0A0A6J9A0|A0A0A6J9A0_CANAX; tr|A0A0A6J199|A0A0A6J19…	Elongation factor 1-alpha OS=Candida albicans (strain WO-1) GN=CAWG_00588 PE=3 SV=1; Elongation factor 1-alpha OS=Candida albicans (strain SC5314 / ATCC MYA-2876) GN=I503_00814 PE=3 SV=1; Elongation factor 1-alpha OS=Candida albicans (strain SC5314 / ATCC MYA-2876) GN=W5Q_02251 PE=3 SV=1; Elongation factor 1-alpha OS=Candida albicans P78042 GN=MGS_00808 PE=3 SV=1; Elongation factor 1-alpha OS=Can…			0	99	QTVAVGVIKSVEK	Gln->pyro-Glu@N-term	missed K-S@9	0.000974615	1339.77	670.893	1339.77	670.893	2	15	1.1.1.1971.11	1	24.8723	3111.09	24.7695
1	93.17	93.17	63.97	63.97	63.97	tr|C4YDJ3|C4YDJ3_CANAW; tr|A0A0A6Q741|A0A0A6Q741_CANAL; tr|A0A0A6M7H0|A0A0A6M7H0_CANAL; tr|A0A0A6M386|A0A0A6M386_CANAX; tr|A0A0A6LGT0|A0A0A6LGT0_CANAX; tr|A0A0A6L5Y0|A0A0A6L5Y0_CANAX; tr|A0A0A6L1C0|A0A0A6L1C0_CANAX; tr|A0A0A6KWM0|A0A0A6KWM0_CANAX; tr|A0A0A6K9D4|A0A0A6K9D4_CANAX; tr|A0A0A6K455|A0A0A6K455_CANAX; tr|A0A0A6JWU4|A0A0A6JWU4_CANAX; tr|A0A0A6J9A0|A0A0A6J9A0_CANAX; tr|A0A0A6J199|A0A0A6J19…	Elongation factor 1-alpha OS=Candida albicans (strain WO-1) GN=CAWG_00588 PE=3 SV=1; Elongation factor 1-alpha OS=Candida albicans (strain SC5314 / ATCC MYA-2876) GN=I503_00814 PE=3 SV=1; Elongation factor 1-alpha OS=Candida albicans (strain SC5314 / ATCC MYA-2876) GN=W5Q_02251 PE=3 SV=1; Elongation factor 1-alpha OS=Candida albicans P78042 GN=MGS_00808 PE=3 SV=1; Elongation factor 1-alpha OS=Can…			0	99	QTVAVGVIKSVEK		missed K-S@9	-0.00808291	1356.79	453.271	1356.8	453.273	3	11	1.1.1.1778.3	1	17.1581	894.358	17.2295
1	93.17	93.17	63.97	63.97	63.97	tr|C4YDJ3|C4YDJ3_CANAW; tr|A0A0A6Q741|A0A0A6Q741_CANAL; tr|A0A0A6M7H0|A0A0A6M7H0_CANAL; tr|A0A0A6M386|A0A0A6M386_CANAX; tr|A0A0A6LGT0|A0A0A6LGT0_CANAX; tr|A0A0A6L5Y0|A0A0A6L5Y0_CANAX; tr|A0A0A6L1C0|A0A0A6L1C0_CANAX; tr|A0A0A6KWM0|A0A0A6KWM0_CANAX; tr|A0A0A6K9D4|A0A0A6K9D4_CANAX; tr|A0A0A6K455|A0A0A6K455_CANAX; tr|A0A0A6JWU4|A0A0A6JWU4_CANAX; tr|A0A0A6J9A0|A0A0A6J9A0_CANAX; tr|A0A0A6J199|A0A0A6J19…	Elongation factor 1-alpha OS=Candida albicans (strain WO-1) GN=CAWG_00588 PE=3 SV=1; Elongation factor 1-alpha OS=Candida albicans (strain SC5314 / ATCC MYA-2876) GN=I503_00814 PE=3 SV=1; Elongation factor 1-alpha OS=Candida albicans (strain SC5314 / ATCC MYA-2876) GN=W5Q_02251 PE=3 SV=1; Elongation factor 1-alpha OS=Candida albicans P78042 GN=MGS_00808 PE=3 SV=1; Elongation factor 1-alpha OS=Can…			0	99	QTVAVGVIKSVEK		missed K-S@9	-0.00808291	1356.79	453.271	1356.8	453.273	3	9	1.1.1.1781.3	1	17.279	894.358	17.2295
1	93.17	93.17	63.97	63.97	63.97	tr|C4YDJ3|C4YDJ3_CANAW; tr|A0A0A6Q741|A0A0A6Q741_CANAL; tr|A0A0A6M7H0|A0A0A6M7H0_CANAL; tr|A0A0A6M386|A0A0A6M386_CANAX; tr|A0A0A6LGT0|A0A0A6LGT0_CANAX; tr|A0A0A6L5Y0|A0A0A6L5Y0_CANAX; tr|A0A0A6L1C0|A0A0A6L1C0_CANAX; tr|A0A0A6KWM0|A0A0A6KWM0_CANAX; tr|A0A0A6K9D4|A0A0A6K9D4_CANAX; tr|A0A0A6K455|A0A0A6K455_CANAX; tr|A0A0A6JWU4|A0A0A6JWU4_CANAX; tr|A0A0A6J9A0|A0A0A6J9A0_CANAX; tr|A0A0A6J199|A0A0A6J19…	Elongation factor 1-alpha OS=Candida albicans (strain WO-1) GN=CAWG_00588 PE=3 SV=1; Elongation factor 1-alpha OS=Candida albicans (strain SC5314 / ATCC MYA-2876) GN=I503_00814 PE=3 SV=1; Elongation factor 1-alpha OS=Candida albicans (strain SC5314 / ATCC MYA-2876) GN=W5Q_02251 PE=3 SV=1; Elongation factor 1-alpha OS=Candida albicans P78042 GN=MGS_00808 PE=3 SV=1; Elongation factor 1-alpha OS=Can…			0	99	QTVAVGVIKSVEKSDK		missed K-S@9; missed K-S@13	-0.00503205	1686.95	563.323	1686.95	563.324	3	12	1.1.1.1762.11	1	16.5291	589.29	16.5468
1	93.17	93.17	63.97	63.97	63.97	tr|C4YDJ3|C4YDJ3_CANAW; tr|A0A0A6Q741|A0A0A6Q741_CANAL; tr|A0A0A6M7H0|A0A0A6M7H0_CANAL; tr|A0A0A6M386|A0A0A6M386_CANAX; tr|A0A0A6LGT0|A0A0A6LGT0_CANAX; tr|A0A0A6L5Y0|A0A0A6L5Y0_CANAX; tr|A0A0A6L1C0|A0A0A6L1C0_CANAX; tr|A0A0A6KWM0|A0A0A6KWM0_CANAX; tr|A0A0A6K9D4|A0A0A6K9D4_CANAX; tr|A0A0A6K455|A0A0A6K455_CANAX; tr|A0A0A6JWU4|A0A0A6JWU4_CANAX; tr|A0A0A6J9A0|A0A0A6J9A0_CANAX; tr|A0A0A6J199|A0A0A6J19…	Elongation factor 1-alpha OS=Candida albicans (strain WO-1) GN=CAWG_00588 PE=3 SV=1; Elongation factor 1-alpha OS=Candida albicans (strain SC5314 / ATCC MYA-2876) GN=I503_00814 PE=3 SV=1; Elongation factor 1-alpha OS=Candida albicans (strain SC5314 / ATCC MYA-2876) GN=W5Q_02251 PE=3 SV=1; Elongation factor 1-alpha OS=Candida albicans P78042 GN=MGS_00808 PE=3 SV=1; Elongation factor 1-alpha OS=Can…			0	99	QTVAVGVIKSVEKSDKAGK		missed K-S@9; missed K-S@13; missed K-A@16	-0.00438217	1943.1	486.783	1943.11	486.784	4	10	1.1.1.1728.5	1	15.1518	522.805	15.0993
1	93.17	93.17	63.97	63.97	63.97	tr|C4YDJ3|C4YDJ3_CANAW; tr|A0A0A6Q741|A0A0A6Q741_CANAL; tr|A0A0A6M7H0|A0A0A6M7H0_CANAL; tr|A0A0A6M386|A0A0A6M386_CANAX; tr|A0A0A6LGT0|A0A0A6LGT0_CANAX; tr|A0A0A6L5Y0|A0A0A6L5Y0_CANAX; tr|A0A0A6L1C0|A0A0A6L1C0_CANAX; tr|A0A0A6KWM0|A0A0A6KWM0_CANAX; tr|A0A0A6K9D4|A0A0A6K9D4_CANAX; tr|A0A0A6K455|A0A0A6K455_CANAX; tr|A0A0A6JWU4|A0A0A6JWU4_CANAX; tr|A0A0A6J9A0|A0A0A6J9A0_CANAX; tr|A0A0A6J199|A0A0A6J19…	Elongation factor 1-alpha OS=Candida albicans (strain WO-1) GN=CAWG_00588 PE=3 SV=1; Elongation factor 1-alpha OS=Candida albicans (strain SC5314 / ATCC MYA-2876) GN=I503_00814 PE=3 SV=1; Elongation factor 1-alpha OS=Candida albicans (strain SC5314 / ATCC MYA-2876) GN=W5Q_02251 PE=3 SV=1; Elongation factor 1-alpha OS=Candida albicans P78042 GN=MGS_00808 PE=3 SV=1; Elongation factor 1-alpha OS=Can…			0	95.47	QTVAVGVIKSVEKSDKAGK	Dehydrated(T)@2	missed K-S@9; missed K-S@13; missed K-A@16	-0.0240994	1925.07	482.275	1925.09	482.281	4	10	1.1.1.1885.5	1	21.4413	1280.74	21.3888
1	93.17	93.17	63.97	63.97	63.97	tr|C4YDJ3|C4YDJ3_CANAW; tr|A0A0A6Q741|A0A0A6Q741_CANAL; tr|A0A0A6M7H0|A0A0A6M7H0_CANAL; tr|A0A0A6M386|A0A0A6M386_CANAX; tr|A0A0A6LGT0|A0A0A6LGT0_CANAX; tr|A0A0A6L5Y0|A0A0A6L5Y0_CANAX; tr|A0A0A6L1C0|A0A0A6L1C0_CANAX; tr|A0A0A6KWM0|A0A0A6KWM0_CANAX; tr|A0A0A6K9D4|A0A0A6K9D4_CANAX; tr|A0A0A6K455|A0A0A6K455_CANAX; tr|A0A0A6JWU4|A0A0A6JWU4_CANAX; tr|A0A0A6J9A0|A0A0A6J9A0_CANAX; tr|A0A0A6J199|A0A0A6J19…	Elongation factor 1-alpha OS=Candida albicans (strain WO-1) GN=CAWG_00588 PE=3 SV=1; Elongation factor 1-alpha OS=Candida albicans (strain SC5314 / ATCC MYA-2876) GN=I503_00814 PE=3 SV=1; Elongation factor 1-alpha OS=Candida albicans (strain SC5314 / ATCC MYA-2876) GN=W5Q_02251 PE=3 SV=1; Elongation factor 1-alpha OS=Candida albicans P78042 GN=MGS_00808 PE=3 SV=1; Elongation factor 1-alpha OS=Can…			0	99	QTVAVGVIKSVEKSDKAGKVTK		missed K-S@9; missed K-S@13; missed K-A@16; missed K-V@19	0.000583542	2271.32	758.113	2271.32	758.113	3	15	1.1.1.1711.18	1	14.492	889.399	14.5381
1	93.17	93.17	63.97	63.97	63.97	tr|C4YDJ3|C4YDJ3_CANAW; tr|A0A0A6Q741|A0A0A6Q741_CANAL; tr|A0A0A6M7H0|A0A0A6M7H0_CANAL; tr|A0A0A6M386|A0A0A6M386_CANAX; tr|A0A0A6LGT0|A0A0A6LGT0_CANAX; tr|A0A0A6L5Y0|A0A0A6L5Y0_CANAX; tr|A0A0A6L1C0|A0A0A6L1C0_CANAX; tr|A0A0A6KWM0|A0A0A6KWM0_CANAX; tr|A0A0A6K9D4|A0A0A6K9D4_CANAX; tr|A0A0A6K455|A0A0A6K455_CANAX; tr|A0A0A6JWU4|A0A0A6JWU4_CANAX; tr|A0A0A6J9A0|A0A0A6J9A0_CANAX; tr|A0A0A6J199|A0A0A6J19…	Elongation factor 1-alpha OS=Candida albicans (strain WO-1) GN=CAWG_00588 PE=3 SV=1; Elongation factor 1-alpha OS=Candida albicans (strain SC5314 / ATCC MYA-2876) GN=I503_00814 PE=3 SV=1; Elongation factor 1-alpha OS=Candida albicans (strain SC5314 / ATCC MYA-2876) GN=W5Q_02251 PE=3 SV=1; Elongation factor 1-alpha OS=Candida albicans P78042 GN=MGS_00808 PE=3 SV=1; Elongation factor 1-alpha OS=Can…			0	99	QTVAVGVIKSVEKSDKAGKVTK		missed K-S@9; missed K-S@13; missed K-A@16; missed K-V@19	-0.00201141	2271.31	455.27	2271.32	455.271	5	19	1.1.1.1712.4	1	14.5088	2597.09	14.5381
1	93.17	93.17	63.97	63.97	63.97	tr|C4YDJ3|C4YDJ3_CANAW; tr|A0A0A6Q741|A0A0A6Q741_CANAL; tr|A0A0A6M7H0|A0A0A6M7H0_CANAL; tr|A0A0A6M386|A0A0A6M386_CANAX; tr|A0A0A6LGT0|A0A0A6LGT0_CANAX; tr|A0A0A6L5Y0|A0A0A6L5Y0_CANAX; tr|A0A0A6L1C0|A0A0A6L1C0_CANAX; tr|A0A0A6KWM0|A0A0A6KWM0_CANAX; tr|A0A0A6K9D4|A0A0A6K9D4_CANAX; tr|A0A0A6K455|A0A0A6K455_CANAX; tr|A0A0A6JWU4|A0A0A6JWU4_CANAX; tr|A0A0A6J9A0|A0A0A6J9A0_CANAX; tr|A0A0A6J199|A0A0A6J19…	Elongation factor 1-alpha OS=Candida albicans (strain WO-1) GN=CAWG_00588 PE=3 SV=1; Elongation factor 1-alpha OS=Candida albicans (strain SC5314 / ATCC MYA-2876) GN=I503_00814 PE=3 SV=1; Elongation factor 1-alpha OS=Candida albicans (strain SC5314 / ATCC MYA-2876) GN=W5Q_02251 PE=3 SV=1; Elongation factor 1-alpha OS=Candida albicans P78042 GN=MGS_00808 PE=3 SV=1; Elongation factor 1-alpha OS=Can…			0	99	QTVAVGVIKSVEKSDKAGKVTK		missed K-S@9; missed K-S@13; missed K-A@16; missed K-V@19	0.00045587	2271.32	568.836	2271.32	568.836	4	16	1.1.1.1712.11	1	14.5204	2109.26	14.5381
1	93.17	93.17	63.97	63.97	63.97	tr|C4YDJ3|C4YDJ3_CANAW; tr|A0A0A6Q741|A0A0A6Q741_CANAL; tr|A0A0A6M7H0|A0A0A6M7H0_CANAL; tr|A0A0A6M386|A0A0A6M386_CANAX; tr|A0A0A6LGT0|A0A0A6LGT0_CANAX; tr|A0A0A6L5Y0|A0A0A6L5Y0_CANAX; tr|A0A0A6L1C0|A0A0A6L1C0_CANAX; tr|A0A0A6KWM0|A0A0A6KWM0_CANAX; tr|A0A0A6K9D4|A0A0A6K9D4_CANAX; tr|A0A0A6K455|A0A0A6K455_CANAX; tr|A0A0A6JWU4|A0A0A6JWU4_CANAX; tr|A0A0A6J9A0|A0A0A6J9A0_CANAX; tr|A0A0A6J199|A0A0A6J19…	Elongation factor 1-alpha OS=Candida albicans (strain WO-1) GN=CAWG_00588 PE=3 SV=1; Elongation factor 1-alpha OS=Candida albicans (strain SC5314 / ATCC MYA-2876) GN=I503_00814 PE=3 SV=1; Elongation factor 1-alpha OS=Candida albicans (strain SC5314 / ATCC MYA-2876) GN=W5Q_02251 PE=3 SV=1; Elongation factor 1-alpha OS=Candida albicans P78042 GN=MGS_00808 PE=3 SV=1; Elongation factor 1-alpha OS=Can…			0	99	QTVAVGVIKSVEKSDKAGKVTK		missed K-S@9; missed K-S@13; missed K-A@16; missed K-V@19	0.000583542	2271.32	758.113	2271.32	758.113	3	16	1.1.1.1713.18	1	14.5723	889.399	14.5381
1	93.17	93.17	63.97	63.97	63.97	tr|C4YDJ3|C4YDJ3_CANAW; tr|A0A0A6Q741|A0A0A6Q741_CANAL; tr|A0A0A6M7H0|A0A0A6M7H0_CANAL; tr|A0A0A6M386|A0A0A6M386_CANAX; tr|A0A0A6LGT0|A0A0A6LGT0_CANAX; tr|A0A0A6L5Y0|A0A0A6L5Y0_CANAX; tr|A0A0A6L1C0|A0A0A6L1C0_CANAX; tr|A0A0A6KWM0|A0A0A6KWM0_CANAX; tr|A0A0A6K9D4|A0A0A6K9D4_CANAX; tr|A0A0A6K455|A0A0A6K455_CANAX; tr|A0A0A6JWU4|A0A0A6JWU4_CANAX; tr|A0A0A6J9A0|A0A0A6J9A0_CANAX; tr|A0A0A6J199|A0A0A6J19…	Elongation factor 1-alpha OS=Candida albicans (strain WO-1) GN=CAWG_00588 PE=3 SV=1; Elongation factor 1-alpha OS=Candida albicans (strain SC5314 / ATCC MYA-2876) GN=I503_00814 PE=3 SV=1; Elongation factor 1-alpha OS=Candida albicans (strain SC5314 / ATCC MYA-2876) GN=W5Q_02251 PE=3 SV=1; Elongation factor 1-alpha OS=Candida albicans P78042 GN=MGS_00808 PE=3 SV=1; Elongation factor 1-alpha OS=Can…			0	99	QTVAVGVIKSVEKSDKAGKVTK		missed K-S@9; missed K-S@13; missed K-A@16; missed K-V@19	-0.00201141	2271.31	455.27	2271.32	455.271	5	14	1.1.1.1715.4	1	14.6294	2597.09	14.5381
1	93.17	93.17	63.97	63.97	63.97	tr|C4YDJ3|C4YDJ3_CANAW; tr|A0A0A6Q741|A0A0A6Q741_CANAL; tr|A0A0A6M7H0|A0A0A6M7H0_CANAL; tr|A0A0A6M386|A0A0A6M386_CANAX; tr|A0A0A6LGT0|A0A0A6LGT0_CANAX; tr|A0A0A6L5Y0|A0A0A6L5Y0_CANAX; tr|A0A0A6L1C0|A0A0A6L1C0_CANAX; tr|A0A0A6KWM0|A0A0A6KWM0_CANAX; tr|A0A0A6K9D4|A0A0A6K9D4_CANAX; tr|A0A0A6K455|A0A0A6K455_CANAX; tr|A0A0A6JWU4|A0A0A6JWU4_CANAX; tr|A0A0A6J9A0|A0A0A6J9A0_CANAX; tr|A0A0A6J199|A0A0A6J19…	Elongation factor 1-alpha OS=Candida albicans (strain WO-1) GN=CAWG_00588 PE=3 SV=1; Elongation factor 1-alpha OS=Candida albicans (strain SC5314 / ATCC MYA-2876) GN=I503_00814 PE=3 SV=1; Elongation factor 1-alpha OS=Candida albicans (strain SC5314 / ATCC MYA-2876) GN=W5Q_02251 PE=3 SV=1; Elongation factor 1-alpha OS=Candida albicans P78042 GN=MGS_00808 PE=3 SV=1; Elongation factor 1-alpha OS=Can…			0	99	QTVAVGVIKSVEKSDKAGKVTK	Gln->pyro-Glu@N-term	missed K-S@9; missed K-S@13; missed K-A@16; missed K-V@19	-0.00328206	2254.29	564.579	2254.29	564.58	4	17	1.1.1.1843.11	1	19.7749	5313.99	19.9128
1	93.17	93.17	63.97	63.97	63.97	tr|C4YDJ3|C4YDJ3_CANAW; tr|A0A0A6Q741|A0A0A6Q741_CANAL; tr|A0A0A6M7H0|A0A0A6M7H0_CANAL; tr|A0A0A6M386|A0A0A6M386_CANAX; tr|A0A0A6LGT0|A0A0A6LGT0_CANAX; tr|A0A0A6L5Y0|A0A0A6L5Y0_CANAX; tr|A0A0A6L1C0|A0A0A6L1C0_CANAX; tr|A0A0A6KWM0|A0A0A6KWM0_CANAX; tr|A0A0A6K9D4|A0A0A6K9D4_CANAX; tr|A0A0A6K455|A0A0A6K455_CANAX; tr|A0A0A6JWU4|A0A0A6JWU4_CANAX; tr|A0A0A6J9A0|A0A0A6J9A0_CANAX; tr|A0A0A6J199|A0A0A6J19…	Elongation factor 1-alpha OS=Candida albicans (strain WO-1) GN=CAWG_00588 PE=3 SV=1; Elongation factor 1-alpha OS=Candida albicans (strain SC5314 / ATCC MYA-2876) GN=I503_00814 PE=3 SV=1; Elongation factor 1-alpha OS=Candida albicans (strain SC5314 / ATCC MYA-2876) GN=W5Q_02251 PE=3 SV=1; Elongation factor 1-alpha OS=Candida albicans P78042 GN=MGS_00808 PE=3 SV=1; Elongation factor 1-alpha OS=Can…			0	99	QTVAVGVIKSVEKSDKAGKVTK	Gln->pyro-Glu@N-term	missed K-S@9; missed K-S@13; missed K-A@16; missed K-V@19	-0.00504804	2254.28	451.864	2254.29	451.865	5	20	1.1.1.1848.7	1	19.9686	4353.36	19.9128
1	93.17	93.17	63.97	63.97	63.97	tr|C4YDJ3|C4YDJ3_CANAW; tr|A0A0A6Q741|A0A0A6Q741_CANAL; tr|A0A0A6M7H0|A0A0A6M7H0_CANAL; tr|A0A0A6M386|A0A0A6M386_CANAX; tr|A0A0A6LGT0|A0A0A6LGT0_CANAX; tr|A0A0A6L5Y0|A0A0A6L5Y0_CANAX; tr|A0A0A6L1C0|A0A0A6L1C0_CANAX; tr|A0A0A6KWM0|A0A0A6KWM0_CANAX; tr|A0A0A6K9D4|A0A0A6K9D4_CANAX; tr|A0A0A6K455|A0A0A6K455_CANAX; tr|A0A0A6JWU4|A0A0A6JWU4_CANAX; tr|A0A0A6J9A0|A0A0A6J9A0_CANAX; tr|A0A0A6J199|A0A0A6J19…	Elongation factor 1-alpha OS=Candida albicans (strain WO-1) GN=CAWG_00588 PE=3 SV=1; Elongation factor 1-alpha OS=Candida albicans (strain SC5314 / ATCC MYA-2876) GN=I503_00814 PE=3 SV=1; Elongation factor 1-alpha OS=Candida albicans (strain SC5314 / ATCC MYA-2876) GN=W5Q_02251 PE=3 SV=1; Elongation factor 1-alpha OS=Candida albicans P78042 GN=MGS_00808 PE=3 SV=1; Elongation factor 1-alpha OS=Can…			0	99	QTVAVGVIKSVEKSDKAGKVTK	Gln->pyro-Glu@N-term	missed K-S@9; missed K-S@13; missed K-A@16; missed K-V@19	-0.00328206	2254.29	564.579	2254.29	564.58	4	14	1.1.1.1852.11	1	20.136	5313.99	19.9128
1	93.17	93.17	63.97	63.97	63.97	tr|C4YDJ3|C4YDJ3_CANAW; tr|A0A0A6Q741|A0A0A6Q741_CANAL; tr|A0A0A6M7H0|A0A0A6M7H0_CANAL; tr|A0A0A6M386|A0A0A6M386_CANAX; tr|A0A0A6LGT0|A0A0A6LGT0_CANAX; tr|A0A0A6L5Y0|A0A0A6L5Y0_CANAX; tr|A0A0A6L1C0|A0A0A6L1C0_CANAX; tr|A0A0A6KWM0|A0A0A6KWM0_CANAX; tr|A0A0A6K9D4|A0A0A6K9D4_CANAX; tr|A0A0A6K455|A0A0A6K455_CANAX; tr|A0A0A6JWU4|A0A0A6JWU4_CANAX; tr|A0A0A6J9A0|A0A0A6J9A0_CANAX; tr|A0A0A6J199|A0A0A6J19…	Elongation factor 1-alpha OS=Candida albicans (strain WO-1) GN=CAWG_00588 PE=3 SV=1; Elongation factor 1-alpha OS=Candida albicans (strain SC5314 / ATCC MYA-2876) GN=I503_00814 PE=3 SV=1; Elongation factor 1-alpha OS=Candida albicans (strain SC5314 / ATCC MYA-2876) GN=W5Q_02251 PE=3 SV=1; Elongation factor 1-alpha OS=Candida albicans P78042 GN=MGS_00808 PE=3 SV=1; Elongation factor 1-alpha OS=Can…			0	99	QTVAVGVIKSVEKSDKAGKVTK		missed K-S@9; missed K-S@13; missed K-A@16; missed K-V@19	-0.00201141	2271.31	455.27	2271.32	455.271	5	12	1.1.1.1709.6	1	14.3916	2597.09	14.5381
1	93.17	93.17	63.97	63.97	63.97	tr|C4YDJ3|C4YDJ3_CANAW; tr|A0A0A6Q741|A0A0A6Q741_CANAL; tr|A0A0A6M7H0|A0A0A6M7H0_CANAL; tr|A0A0A6M386|A0A0A6M386_CANAX; tr|A0A0A6LGT0|A0A0A6LGT0_CANAX; tr|A0A0A6L5Y0|A0A0A6L5Y0_CANAX; tr|A0A0A6L1C0|A0A0A6L1C0_CANAX; tr|A0A0A6KWM0|A0A0A6KWM0_CANAX; tr|A0A0A6K9D4|A0A0A6K9D4_CANAX; tr|A0A0A6K455|A0A0A6K455_CANAX; tr|A0A0A6JWU4|A0A0A6JWU4_CANAX; tr|A0A0A6J9A0|A0A0A6J9A0_CANAX; tr|A0A0A6J199|A0A0A6J19…	Elongation factor 1-alpha OS=Candida albicans (strain WO-1) GN=CAWG_00588 PE=3 SV=1; Elongation factor 1-alpha OS=Candida albicans (strain SC5314 / ATCC MYA-2876) GN=I503_00814 PE=3 SV=1; Elongation factor 1-alpha OS=Candida albicans (strain SC5314 / ATCC MYA-2876) GN=W5Q_02251 PE=3 SV=1; Elongation factor 1-alpha OS=Candida albicans P78042 GN=MGS_00808 PE=3 SV=1; Elongation factor 1-alpha OS=Can…			0	97.82	QTVAVGVIKSVEKSDKAGKVTK		missed K-S@9; missed K-S@13; missed K-A@16; missed K-V@19	-0.00100061	2271.32	379.56	2271.32	379.56	6	7	1.1.1.1714.2	1	14.5858	888.352	14.5381
1	93.17	93.17	63.97	63.97	63.97	tr|C4YDJ3|C4YDJ3_CANAW; tr|A0A0A6Q741|A0A0A6Q741_CANAL; tr|A0A0A6M7H0|A0A0A6M7H0_CANAL; tr|A0A0A6M386|A0A0A6M386_CANAX; tr|A0A0A6LGT0|A0A0A6LGT0_CANAX; tr|A0A0A6L5Y0|A0A0A6L5Y0_CANAX; tr|A0A0A6L1C0|A0A0A6L1C0_CANAX; tr|A0A0A6KWM0|A0A0A6KWM0_CANAX; tr|A0A0A6K9D4|A0A0A6K9D4_CANAX; tr|A0A0A6K455|A0A0A6K455_CANAX; tr|A0A0A6JWU4|A0A0A6JWU4_CANAX; tr|A0A0A6J9A0|A0A0A6J9A0_CANAX; tr|A0A0A6J199|A0A0A6J19…	Elongation factor 1-alpha OS=Candida albicans (strain WO-1) GN=CAWG_00588 PE=3 SV=1; Elongation factor 1-alpha OS=Candida albicans (strain SC5314 / ATCC MYA-2876) GN=I503_00814 PE=3 SV=1; Elongation factor 1-alpha OS=Candida albicans (strain SC5314 / ATCC MYA-2876) GN=W5Q_02251 PE=3 SV=1; Elongation factor 1-alpha OS=Candida albicans P78042 GN=MGS_00808 PE=3 SV=1; Elongation factor 1-alpha OS=Can…			0	99	QTVAVGVIKSVEKSDKAGKVTKAAQK		missed K-S@9; missed K-S@13; missed K-A@16; missed K-V@19; missed K-A@22	-0.0035644	2669.54	668.392	2669.54	668.393	4	20	1.1.1.1686.16	1	13.4872	1166.54	13.5367
1	93.17	93.17	63.97	63.97	63.97	tr|C4YDJ3|C4YDJ3_CANAW; tr|A0A0A6Q741|A0A0A6Q741_CANAL; tr|A0A0A6M7H0|A0A0A6M7H0_CANAL; tr|A0A0A6M386|A0A0A6M386_CANAX; tr|A0A0A6LGT0|A0A0A6LGT0_CANAX; tr|A0A0A6L5Y0|A0A0A6L5Y0_CANAX; tr|A0A0A6L1C0|A0A0A6L1C0_CANAX; tr|A0A0A6KWM0|A0A0A6KWM0_CANAX; tr|A0A0A6K9D4|A0A0A6K9D4_CANAX; tr|A0A0A6K455|A0A0A6K455_CANAX; tr|A0A0A6JWU4|A0A0A6JWU4_CANAX; tr|A0A0A6J9A0|A0A0A6J9A0_CANAX; tr|A0A0A6J199|A0A0A6J19…	Elongation factor 1-alpha OS=Candida albicans (strain WO-1) GN=CAWG_00588 PE=3 SV=1; Elongation factor 1-alpha OS=Candida albicans (strain SC5314 / ATCC MYA-2876) GN=I503_00814 PE=3 SV=1; Elongation factor 1-alpha OS=Candida albicans (strain SC5314 / ATCC MYA-2876) GN=W5Q_02251 PE=3 SV=1; Elongation factor 1-alpha OS=Candida albicans P78042 GN=MGS_00808 PE=3 SV=1; Elongation factor 1-alpha OS=Can…			0	99	QTVAVGVIKSVEKSDKAGKVTKAAQK		missed K-S@9; missed K-S@13; missed K-A@16; missed K-V@19; missed K-A@22	-0.00557891	2669.54	534.915	2669.54	534.916	5	15	1.1.1.1688.8	1	13.554	1598.71	13.5767
1	93.17	93.17	63.97	63.97	63.97	tr|C4YDJ3|C4YDJ3_CANAW; tr|A0A0A6Q741|A0A0A6Q741_CANAL; tr|A0A0A6M7H0|A0A0A6M7H0_CANAL; tr|A0A0A6M386|A0A0A6M386_CANAX; tr|A0A0A6LGT0|A0A0A6LGT0_CANAX; tr|A0A0A6L5Y0|A0A0A6L5Y0_CANAX; tr|A0A0A6L1C0|A0A0A6L1C0_CANAX; tr|A0A0A6KWM0|A0A0A6KWM0_CANAX; tr|A0A0A6K9D4|A0A0A6K9D4_CANAX; tr|A0A0A6K455|A0A0A6K455_CANAX; tr|A0A0A6JWU4|A0A0A6JWU4_CANAX; tr|A0A0A6J9A0|A0A0A6J9A0_CANAX; tr|A0A0A6J199|A0A0A6J19…	Elongation factor 1-alpha OS=Candida albicans (strain WO-1) GN=CAWG_00588 PE=3 SV=1; Elongation factor 1-alpha OS=Candida albicans (strain SC5314 / ATCC MYA-2876) GN=I503_00814 PE=3 SV=1; Elongation factor 1-alpha OS=Candida albicans (strain SC5314 / ATCC MYA-2876) GN=W5Q_02251 PE=3 SV=1; Elongation factor 1-alpha OS=Candida albicans P78042 GN=MGS_00808 PE=3 SV=1; Elongation factor 1-alpha OS=Can…			0	99	QTVAVGVIKSVEKSDKAGKVTKAAQK		missed K-S@9; missed K-S@13; missed K-A@16; missed K-V@19; missed K-A@22	-0.00142071	2669.54	890.855	2669.54	890.855	3	13	1.1.1.1689.19	1	13.6124	246.982	13.5367
1	93.17	93.17	63.97	63.97	63.97	tr|C4YDJ3|C4YDJ3_CANAW; tr|A0A0A6Q741|A0A0A6Q741_CANAL; tr|A0A0A6M7H0|A0A0A6M7H0_CANAL; tr|A0A0A6M386|A0A0A6M386_CANAX; tr|A0A0A6LGT0|A0A0A6LGT0_CANAX; tr|A0A0A6L5Y0|A0A0A6L5Y0_CANAX; tr|A0A0A6L1C0|A0A0A6L1C0_CANAX; tr|A0A0A6KWM0|A0A0A6KWM0_CANAX; tr|A0A0A6K9D4|A0A0A6K9D4_CANAX; tr|A0A0A6K455|A0A0A6K455_CANAX; tr|A0A0A6JWU4|A0A0A6JWU4_CANAX; tr|A0A0A6J9A0|A0A0A6J9A0_CANAX; tr|A0A0A6J199|A0A0A6J19…	Elongation factor 1-alpha OS=Candida albicans (strain WO-1) GN=CAWG_00588 PE=3 SV=1; Elongation factor 1-alpha OS=Candida albicans (strain SC5314 / ATCC MYA-2876) GN=I503_00814 PE=3 SV=1; Elongation factor 1-alpha OS=Candida albicans (strain SC5314 / ATCC MYA-2876) GN=W5Q_02251 PE=3 SV=1; Elongation factor 1-alpha OS=Candida albicans P78042 GN=MGS_00808 PE=3 SV=1; Elongation factor 1-alpha OS=Can…			0	99	QTVAVGVIKSVEKSDKAGKVTKAAQK	Gln->pyro-Glu@N-term	missed K-S@9; missed K-S@13; missed K-A@16; missed K-V@19; missed K-A@22	-0.00645644	2652.51	531.51	2652.52	531.511	5	21	1.1.1.1800.11	1	18.0556	2893.31	18.0733
1	93.17	93.17	63.97	63.97	63.97	tr|C4YDJ3|C4YDJ3_CANAW; tr|A0A0A6Q741|A0A0A6Q741_CANAL; tr|A0A0A6M7H0|A0A0A6M7H0_CANAL; tr|A0A0A6M386|A0A0A6M386_CANAX; tr|A0A0A6LGT0|A0A0A6LGT0_CANAX; tr|A0A0A6L5Y0|A0A0A6L5Y0_CANAX; tr|A0A0A6L1C0|A0A0A6L1C0_CANAX; tr|A0A0A6KWM0|A0A0A6KWM0_CANAX; tr|A0A0A6K9D4|A0A0A6K9D4_CANAX; tr|A0A0A6K455|A0A0A6K455_CANAX; tr|A0A0A6JWU4|A0A0A6JWU4_CANAX; tr|A0A0A6J9A0|A0A0A6J9A0_CANAX; tr|A0A0A6J199|A0A0A6J19…	Elongation factor 1-alpha OS=Candida albicans (strain WO-1) GN=CAWG_00588 PE=3 SV=1; Elongation factor 1-alpha OS=Candida albicans (strain SC5314 / ATCC MYA-2876) GN=I503_00814 PE=3 SV=1; Elongation factor 1-alpha OS=Candida albicans (strain SC5314 / ATCC MYA-2876) GN=W5Q_02251 PE=3 SV=1; Elongation factor 1-alpha OS=Candida albicans P78042 GN=MGS_00808 PE=3 SV=1; Elongation factor 1-alpha OS=Can…			0	99	QTVAVGVIKSVEKSDKAGKVTKAAQK	Gln->pyro-Glu@N-term	missed K-S@9; missed K-S@13; missed K-A@16; missed K-V@19; missed K-A@22	-0.00532874	2652.51	664.135	2652.52	664.137	4	20	1.1.1.1801.18	1	18.1075	1940.04	18.0733
1	93.17	93.17	63.97	63.97	63.97	tr|C4YDJ3|C4YDJ3_CANAW; tr|A0A0A6Q741|A0A0A6Q741_CANAL; tr|A0A0A6M7H0|A0A0A6M7H0_CANAL; tr|A0A0A6M386|A0A0A6M386_CANAX; tr|A0A0A6LGT0|A0A0A6LGT0_CANAX; tr|A0A0A6L5Y0|A0A0A6L5Y0_CANAX; tr|A0A0A6L1C0|A0A0A6L1C0_CANAX; tr|A0A0A6KWM0|A0A0A6KWM0_CANAX; tr|A0A0A6K9D4|A0A0A6K9D4_CANAX; tr|A0A0A6K455|A0A0A6K455_CANAX; tr|A0A0A6JWU4|A0A0A6JWU4_CANAX; tr|A0A0A6J9A0|A0A0A6J9A0_CANAX; tr|A0A0A6J199|A0A0A6J19…	Elongation factor 1-alpha OS=Candida albicans (strain WO-1) GN=CAWG_00588 PE=3 SV=1; Elongation factor 1-alpha OS=Candida albicans (strain SC5314 / ATCC MYA-2876) GN=I503_00814 PE=3 SV=1; Elongation factor 1-alpha OS=Candida albicans (strain SC5314 / ATCC MYA-2876) GN=W5Q_02251 PE=3 SV=1; Elongation factor 1-alpha OS=Candida albicans P78042 GN=MGS_00808 PE=3 SV=1; Elongation factor 1-alpha OS=Can…			0	99	QTVAVGVIKSVEKSDKAGKVTKAAQK	Gln->pyro-Glu@N-term	missed K-S@9; missed K-S@13; missed K-A@16; missed K-V@19; missed K-A@22	-0.00532874	2652.51	664.135	2652.52	664.137	4	17	1.1.1.1802.16	1	18.1446	1940.04	18.0733
1	93.17	93.17	63.97	63.97	63.97	tr|C4YDJ3|C4YDJ3_CANAW; tr|A0A0A6Q741|A0A0A6Q741_CANAL; tr|A0A0A6M7H0|A0A0A6M7H0_CANAL; tr|A0A0A6M386|A0A0A6M386_CANAX; tr|A0A0A6LGT0|A0A0A6LGT0_CANAX; tr|A0A0A6L5Y0|A0A0A6L5Y0_CANAX; tr|A0A0A6L1C0|A0A0A6L1C0_CANAX; tr|A0A0A6KWM0|A0A0A6KWM0_CANAX; tr|A0A0A6K9D4|A0A0A6K9D4_CANAX; tr|A0A0A6K455|A0A0A6K455_CANAX; tr|A0A0A6JWU4|A0A0A6JWU4_CANAX; tr|A0A0A6J9A0|A0A0A6J9A0_CANAX; tr|A0A0A6J199|A0A0A6J19…	Elongation factor 1-alpha OS=Candida albicans (strain WO-1) GN=CAWG_00588 PE=3 SV=1; Elongation factor 1-alpha OS=Candida albicans (strain SC5314 / ATCC MYA-2876) GN=I503_00814 PE=3 SV=1; Elongation factor 1-alpha OS=Candida albicans (strain SC5314 / ATCC MYA-2876) GN=W5Q_02251 PE=3 SV=1; Elongation factor 1-alpha OS=Candida albicans P78042 GN=MGS_00808 PE=3 SV=1; Elongation factor 1-alpha OS=Can…			0	99	QTVAVGVIKSVEKSDKAGKVTKAAQK	Gln->pyro-Glu@N-term	missed K-S@9; missed K-S@13; missed K-A@16; missed K-V@19; missed K-A@22	-0.00645644	2652.51	531.51	2652.52	531.511	5	16	1.1.1.1803.8	1	18.1715	2893.31	18.0733
1	93.17	93.17	63.97	63.97	63.97	tr|C4YDJ3|C4YDJ3_CANAW; tr|A0A0A6Q741|A0A0A6Q741_CANAL; tr|A0A0A6M7H0|A0A0A6M7H0_CANAL; tr|A0A0A6M386|A0A0A6M386_CANAX; tr|A0A0A6LGT0|A0A0A6LGT0_CANAX; tr|A0A0A6L5Y0|A0A0A6L5Y0_CANAX; tr|A0A0A6L1C0|A0A0A6L1C0_CANAX; tr|A0A0A6KWM0|A0A0A6KWM0_CANAX; tr|A0A0A6K9D4|A0A0A6K9D4_CANAX; tr|A0A0A6K455|A0A0A6K455_CANAX; tr|A0A0A6JWU4|A0A0A6JWU4_CANAX; tr|A0A0A6J9A0|A0A0A6J9A0_CANAX; tr|A0A0A6J199|A0A0A6J19…	Elongation factor 1-alpha OS=Candida albicans (strain WO-1) GN=CAWG_00588 PE=3 SV=1; Elongation factor 1-alpha OS=Candida albicans (strain SC5314 / ATCC MYA-2876) GN=I503_00814 PE=3 SV=1; Elongation factor 1-alpha OS=Candida albicans (strain SC5314 / ATCC MYA-2876) GN=W5Q_02251 PE=3 SV=1; Elongation factor 1-alpha OS=Candida albicans P78042 GN=MGS_00808 PE=3 SV=1; Elongation factor 1-alpha OS=Can…			0	99	QTVAVGVIKSVEKSDKAGKVTKAAQK		missed K-S@9; missed K-S@13; missed K-A@16; missed K-V@19; missed K-A@22	-0.0035644	2669.54	668.392	2669.54	668.393	4	13	1.1.1.1690.19	1	13.6525	1166.54	13.5367
1	93.17	93.17	63.97	63.97	63.97	tr|C4YDJ3|C4YDJ3_CANAW; tr|A0A0A6Q741|A0A0A6Q741_CANAL; tr|A0A0A6M7H0|A0A0A6M7H0_CANAL; tr|A0A0A6M386|A0A0A6M386_CANAX; tr|A0A0A6LGT0|A0A0A6LGT0_CANAX; tr|A0A0A6L5Y0|A0A0A6L5Y0_CANAX; tr|A0A0A6L1C0|A0A0A6L1C0_CANAX; tr|A0A0A6KWM0|A0A0A6KWM0_CANAX; tr|A0A0A6K9D4|A0A0A6K9D4_CANAX; tr|A0A0A6K455|A0A0A6K455_CANAX; tr|A0A0A6JWU4|A0A0A6JWU4_CANAX; tr|A0A0A6J9A0|A0A0A6J9A0_CANAX; tr|A0A0A6J199|A0A0A6J19…	Elongation factor 1-alpha OS=Candida albicans (strain WO-1) GN=CAWG_00588 PE=3 SV=1; Elongation factor 1-alpha OS=Candida albicans (strain SC5314 / ATCC MYA-2876) GN=I503_00814 PE=3 SV=1; Elongation factor 1-alpha OS=Candida albicans (strain SC5314 / ATCC MYA-2876) GN=W5Q_02251 PE=3 SV=1; Elongation factor 1-alpha OS=Candida albicans P78042 GN=MGS_00808 PE=3 SV=1; Elongation factor 1-alpha OS=Can…			0	99	QTVAVGVIKSVEKSDKAGKVTKAAQK		missed K-S@9; missed K-S@13; missed K-A@16; missed K-V@19; missed K-A@22	-0.0035644	2669.54	668.392	2669.54	668.393	4	12	1.1.1.1691.17	1	13.6892	1166.54	13.5367
1	93.17	93.17	63.97	63.97	63.97	tr|C4YDJ3|C4YDJ3_CANAW; tr|A0A0A6Q741|A0A0A6Q741_CANAL; tr|A0A0A6M7H0|A0A0A6M7H0_CANAL; tr|A0A0A6M386|A0A0A6M386_CANAX; tr|A0A0A6LGT0|A0A0A6LGT0_CANAX; tr|A0A0A6L5Y0|A0A0A6L5Y0_CANAX; tr|A0A0A6L1C0|A0A0A6L1C0_CANAX; tr|A0A0A6KWM0|A0A0A6KWM0_CANAX; tr|A0A0A6K9D4|A0A0A6K9D4_CANAX; tr|A0A0A6K455|A0A0A6K455_CANAX; tr|A0A0A6JWU4|A0A0A6JWU4_CANAX; tr|A0A0A6J9A0|A0A0A6J9A0_CANAX; tr|A0A0A6J199|A0A0A6J19…	Elongation factor 1-alpha OS=Candida albicans (strain WO-1) GN=CAWG_00588 PE=3 SV=1; Elongation factor 1-alpha OS=Candida albicans (strain SC5314 / ATCC MYA-2876) GN=I503_00814 PE=3 SV=1; Elongation factor 1-alpha OS=Candida albicans (strain SC5314 / ATCC MYA-2876) GN=W5Q_02251 PE=3 SV=1; Elongation factor 1-alpha OS=Candida albicans P78042 GN=MGS_00808 PE=3 SV=1; Elongation factor 1-alpha OS=Can…			0	76.29	QTVAVGVIKSVEKSDKAGKVTKAAQK	Gln->pyro-Glu@N-term	missed K-S@9; missed K-S@13; missed K-A@16; missed K-V@19; missed K-A@22	-0.0131425	2652.5	443.091	2652.52	443.094	6	9	1.1.1.1797.2	1	17.9198	1599.82	18.0733
1	93.17	93.17	63.97	63.97	63.97	tr|C4YDJ3|C4YDJ3_CANAW; tr|A0A0A6Q741|A0A0A6Q741_CANAL; tr|A0A0A6M7H0|A0A0A6M7H0_CANAL; tr|A0A0A6M386|A0A0A6M386_CANAX; tr|A0A0A6LGT0|A0A0A6LGT0_CANAX; tr|A0A0A6L5Y0|A0A0A6L5Y0_CANAX; tr|A0A0A6L1C0|A0A0A6L1C0_CANAX; tr|A0A0A6KWM0|A0A0A6KWM0_CANAX; tr|A0A0A6K9D4|A0A0A6K9D4_CANAX; tr|A0A0A6K455|A0A0A6K455_CANAX; tr|A0A0A6JWU4|A0A0A6JWU4_CANAX; tr|A0A0A6J9A0|A0A0A6J9A0_CANAX; tr|A0A0A6J199|A0A0A6J19…	Elongation factor 1-alpha OS=Candida albicans (strain WO-1) GN=CAWG_00588 PE=3 SV=1; Elongation factor 1-alpha OS=Candida albicans (strain SC5314 / ATCC MYA-2876) GN=I503_00814 PE=3 SV=1; Elongation factor 1-alpha OS=Candida albicans (strain SC5314 / ATCC MYA-2876) GN=W5Q_02251 PE=3 SV=1; Elongation factor 1-alpha OS=Candida albicans P78042 GN=MGS_00808 PE=3 SV=1; Elongation factor 1-alpha OS=Can…			0	65.19	QTVAVGVIKSVEKSDKAGKVTKAAQKAAKK	Trimethyl(K)@30	missed K-S@9; missed K-S@13; missed K-A@16; missed K-V@19; missed K-A@22; missed K-A@26; missed K-K@29	-0.00706259	3109.85	622.977	3109.85	622.978	5	10	1.1.1.1710.18	1	14.4518	576.534	14.4177
1	93.17	93.17	63.97	63.97	63.97	tr|C4YDJ3|C4YDJ3_CANAW; tr|A0A0A6Q741|A0A0A6Q741_CANAL; tr|A0A0A6M7H0|A0A0A6M7H0_CANAL; tr|A0A0A6M386|A0A0A6M386_CANAX; tr|A0A0A6LGT0|A0A0A6LGT0_CANAX; tr|A0A0A6L5Y0|A0A0A6L5Y0_CANAX; tr|A0A0A6L1C0|A0A0A6L1C0_CANAX; tr|A0A0A6KWM0|A0A0A6KWM0_CANAX; tr|A0A0A6K9D4|A0A0A6K9D4_CANAX; tr|A0A0A6K455|A0A0A6K455_CANAX; tr|A0A0A6JWU4|A0A0A6JWU4_CANAX; tr|A0A0A6J9A0|A0A0A6J9A0_CANAX; tr|A0A0A6J199|A0A0A6J19…	Elongation factor 1-alpha OS=Candida albicans (strain WO-1) GN=CAWG_00588 PE=3 SV=1; Elongation factor 1-alpha OS=Candida albicans (strain SC5314 / ATCC MYA-2876) GN=I503_00814 PE=3 SV=1; Elongation factor 1-alpha OS=Candida albicans (strain SC5314 / ATCC MYA-2876) GN=W5Q_02251 PE=3 SV=1; Elongation factor 1-alpha OS=Candida albicans P78042 GN=MGS_00808 PE=3 SV=1; Elongation factor 1-alpha OS=Can…			0	50.4	QTVAVGVIKSVEKSDKAGKVTKAAQKAAKK	Trimethyl(K)@30	missed K-S@9; missed K-S@13; missed K-A@16; missed K-V@19; missed K-A@22; missed K-A@26; missed K-K@29	-0.011797	3109.84	519.314	3109.85	519.316	6	9	1.1.1.1709.12	1	14.4016	681.51	14.3776
1	93.17	93.17	63.97	63.97	63.97	tr|C4YDJ3|C4YDJ3_CANAW; tr|A0A0A6Q741|A0A0A6Q741_CANAL; tr|A0A0A6M7H0|A0A0A6M7H0_CANAL; tr|A0A0A6M386|A0A0A6M386_CANAX; tr|A0A0A6LGT0|A0A0A6LGT0_CANAX; tr|A0A0A6L5Y0|A0A0A6L5Y0_CANAX; tr|A0A0A6L1C0|A0A0A6L1C0_CANAX; tr|A0A0A6KWM0|A0A0A6KWM0_CANAX; tr|A0A0A6K9D4|A0A0A6K9D4_CANAX; tr|A0A0A6K455|A0A0A6K455_CANAX; tr|A0A0A6JWU4|A0A0A6JWU4_CANAX; tr|A0A0A6J9A0|A0A0A6J9A0_CANAX; tr|A0A0A6J199|A0A0A6J19…	Elongation factor 1-alpha OS=Candida albicans (strain WO-1) GN=CAWG_00588 PE=3 SV=1; Elongation factor 1-alpha OS=Candida albicans (strain SC5314 / ATCC MYA-2876) GN=I503_00814 PE=3 SV=1; Elongation factor 1-alpha OS=Candida albicans (strain SC5314 / ATCC MYA-2876) GN=W5Q_02251 PE=3 SV=1; Elongation factor 1-alpha OS=Candida albicans P78042 GN=MGS_00808 PE=3 SV=1; Elongation factor 1-alpha OS=Can…			0	99	RTGKKLEENPKFVKSGDAAIVK		missed R-T@1; missed K-K@4; missed K-L@5; missed K-F@11; missed K-S@14	-0.00618357	2414.36	483.879	2414.36	483.88	5	29	1.1.1.1590.3	1	9.6699	588.604	9.5549
1	93.17	93.17	63.97	63.97	63.97	tr|C4YDJ3|C4YDJ3_CANAW; tr|A0A0A6Q741|A0A0A6Q741_CANAL; tr|A0A0A6M7H0|A0A0A6M7H0_CANAL; tr|A0A0A6M386|A0A0A6M386_CANAX; tr|A0A0A6LGT0|A0A0A6LGT0_CANAX; tr|A0A0A6L5Y0|A0A0A6L5Y0_CANAX; tr|A0A0A6L1C0|A0A0A6L1C0_CANAX; tr|A0A0A6KWM0|A0A0A6KWM0_CANAX; tr|A0A0A6K9D4|A0A0A6K9D4_CANAX; tr|A0A0A6K455|A0A0A6K455_CANAX; tr|A0A0A6JWU4|A0A0A6JWU4_CANAX; tr|A0A0A6J9A0|A0A0A6J9A0_CANAX; tr|A0A0A6J199|A0A0A6J19…	Elongation factor 1-alpha OS=Candida albicans (strain WO-1) GN=CAWG_00588 PE=3 SV=1; Elongation factor 1-alpha OS=Candida albicans (strain SC5314 / ATCC MYA-2876) GN=I503_00814 PE=3 SV=1; Elongation factor 1-alpha OS=Candida albicans (strain SC5314 / ATCC MYA-2876) GN=W5Q_02251 PE=3 SV=1; Elongation factor 1-alpha OS=Candida albicans P78042 GN=MGS_00808 PE=3 SV=1; Elongation factor 1-alpha OS=Can…			0	99	SGDAAIVKMVPTKPMCVEAFTDYPPLGR	Oxidation(M)@9; Oxidation(M)@15; Carbamidomethyl(C)@16	missed K-M@8	-0.00219962	3081.49	771.381	3081.5	771.382	4	25	1.1.1.1993.17	1	25.7644	4493.82	26.013
1	93.17	93.17	63.97	63.97	63.97	tr|C4YDJ3|C4YDJ3_CANAW; tr|A0A0A6Q741|A0A0A6Q741_CANAL; tr|A0A0A6M7H0|A0A0A6M7H0_CANAL; tr|A0A0A6M386|A0A0A6M386_CANAX; tr|A0A0A6LGT0|A0A0A6LGT0_CANAX; tr|A0A0A6L5Y0|A0A0A6L5Y0_CANAX; tr|A0A0A6L1C0|A0A0A6L1C0_CANAX; tr|A0A0A6KWM0|A0A0A6KWM0_CANAX; tr|A0A0A6K9D4|A0A0A6K9D4_CANAX; tr|A0A0A6K455|A0A0A6K455_CANAX; tr|A0A0A6JWU4|A0A0A6JWU4_CANAX; tr|A0A0A6J9A0|A0A0A6J9A0_CANAX; tr|A0A0A6J199|A0A0A6J19…	Elongation factor 1-alpha OS=Candida albicans (strain WO-1) GN=CAWG_00588 PE=3 SV=1; Elongation factor 1-alpha OS=Candida albicans (strain SC5314 / ATCC MYA-2876) GN=I503_00814 PE=3 SV=1; Elongation factor 1-alpha OS=Candida albicans (strain SC5314 / ATCC MYA-2876) GN=W5Q_02251 PE=3 SV=1; Elongation factor 1-alpha OS=Candida albicans P78042 GN=MGS_00808 PE=3 SV=1; Elongation factor 1-alpha OS=Can…			0	99	SGDAAIVKMVPTKPMCVEAFTDYPPLGR	Oxidation(M)@9; Oxidation(M)@15; Carbamidomethyl(C)@16	missed K-M@8	-0.00219962	3081.49	771.381	3081.5	771.382	4	26	1.1.1.1996.15	1	25.8813	4493.82	26.013
1	93.17	93.17	63.97	63.97	63.97	tr|C4YDJ3|C4YDJ3_CANAW; tr|A0A0A6Q741|A0A0A6Q741_CANAL; tr|A0A0A6M7H0|A0A0A6M7H0_CANAL; tr|A0A0A6M386|A0A0A6M386_CANAX; tr|A0A0A6LGT0|A0A0A6LGT0_CANAX; tr|A0A0A6L5Y0|A0A0A6L5Y0_CANAX; tr|A0A0A6L1C0|A0A0A6L1C0_CANAX; tr|A0A0A6KWM0|A0A0A6KWM0_CANAX; tr|A0A0A6K9D4|A0A0A6K9D4_CANAX; tr|A0A0A6K455|A0A0A6K455_CANAX; tr|A0A0A6JWU4|A0A0A6JWU4_CANAX; tr|A0A0A6J9A0|A0A0A6J9A0_CANAX; tr|A0A0A6J199|A0A0A6J19…	Elongation factor 1-alpha OS=Candida albicans (strain WO-1) GN=CAWG_00588 PE=3 SV=1; Elongation factor 1-alpha OS=Candida albicans (strain SC5314 / ATCC MYA-2876) GN=I503_00814 PE=3 SV=1; Elongation factor 1-alpha OS=Candida albicans (strain SC5314 / ATCC MYA-2876) GN=W5Q_02251 PE=3 SV=1; Elongation factor 1-alpha OS=Candida albicans P78042 GN=MGS_00808 PE=3 SV=1; Elongation factor 1-alpha OS=Can…			0	99	SGDAAIVKMVPTKPMCVEAFTDYPPLGR	Oxidation(M)@9; Oxidation(M)@15; Carbamidomethyl(C)@16	missed K-M@8	-0.00219962	3081.49	771.381	3081.5	771.382	4	23	1.1.1.2002.16	1	26.1244	4493.82	26.013
1	93.17	93.17	63.97	63.97	63.97	tr|C4YDJ3|C4YDJ3_CANAW; tr|A0A0A6Q741|A0A0A6Q741_CANAL; tr|A0A0A6M7H0|A0A0A6M7H0_CANAL; tr|A0A0A6M386|A0A0A6M386_CANAX; tr|A0A0A6LGT0|A0A0A6LGT0_CANAX; tr|A0A0A6L5Y0|A0A0A6L5Y0_CANAX; tr|A0A0A6L1C0|A0A0A6L1C0_CANAX; tr|A0A0A6KWM0|A0A0A6KWM0_CANAX; tr|A0A0A6K9D4|A0A0A6K9D4_CANAX; tr|A0A0A6K455|A0A0A6K455_CANAX; tr|A0A0A6JWU4|A0A0A6JWU4_CANAX; tr|A0A0A6J9A0|A0A0A6J9A0_CANAX; tr|A0A0A6J199|A0A0A6J19…	Elongation factor 1-alpha OS=Candida albicans (strain WO-1) GN=CAWG_00588 PE=3 SV=1; Elongation factor 1-alpha OS=Candida albicans (strain SC5314 / ATCC MYA-2876) GN=I503_00814 PE=3 SV=1; Elongation factor 1-alpha OS=Candida albicans (strain SC5314 / ATCC MYA-2876) GN=W5Q_02251 PE=3 SV=1; Elongation factor 1-alpha OS=Candida albicans P78042 GN=MGS_00808 PE=3 SV=1; Elongation factor 1-alpha OS=Can…			0	99	SGDAAIVKMVPTKPMCVEAFTDYPPLGR	Oxidation(M)@9; Oxidation(M)@15; Carbamidomethyl(C)@16	missed K-M@8	-0.00219962	3081.49	771.381	3081.5	771.382	4	22	1.1.1.2005.17	1	26.2468	4493.82	26.013
1	93.17	93.17	63.97	63.97	63.97	tr|C4YDJ3|C4YDJ3_CANAW; tr|A0A0A6Q741|A0A0A6Q741_CANAL; tr|A0A0A6M7H0|A0A0A6M7H0_CANAL; tr|A0A0A6M386|A0A0A6M386_CANAX; tr|A0A0A6LGT0|A0A0A6LGT0_CANAX; tr|A0A0A6L5Y0|A0A0A6L5Y0_CANAX; tr|A0A0A6L1C0|A0A0A6L1C0_CANAX; tr|A0A0A6KWM0|A0A0A6KWM0_CANAX; tr|A0A0A6K9D4|A0A0A6K9D4_CANAX; tr|A0A0A6K455|A0A0A6K455_CANAX; tr|A0A0A6JWU4|A0A0A6JWU4_CANAX; tr|A0A0A6J9A0|A0A0A6J9A0_CANAX; tr|A0A0A6J199|A0A0A6J19…	Elongation factor 1-alpha OS=Candida albicans (strain WO-1) GN=CAWG_00588 PE=3 SV=1; Elongation factor 1-alpha OS=Candida albicans (strain SC5314 / ATCC MYA-2876) GN=I503_00814 PE=3 SV=1; Elongation factor 1-alpha OS=Candida albicans (strain SC5314 / ATCC MYA-2876) GN=W5Q_02251 PE=3 SV=1; Elongation factor 1-alpha OS=Candida albicans P78042 GN=MGS_00808 PE=3 SV=1; Elongation factor 1-alpha OS=Can…			0	99	SGDAAIVKMVPTKPMCVEAFTDYPPLGR	Oxidation(M)@9; Oxidation(M)@15; Carbamidomethyl(C)@16	missed K-M@8	-0.00219962	3081.49	771.381	3081.5	771.382	4	22	1.1.1.2008.16	1	26.3658	4493.82	26.013
1	93.17	93.17	63.97	63.97	63.97	tr|C4YDJ3|C4YDJ3_CANAW; tr|A0A0A6Q741|A0A0A6Q741_CANAL; tr|A0A0A6M7H0|A0A0A6M7H0_CANAL; tr|A0A0A6M386|A0A0A6M386_CANAX; tr|A0A0A6LGT0|A0A0A6LGT0_CANAX; tr|A0A0A6L5Y0|A0A0A6L5Y0_CANAX; tr|A0A0A6L1C0|A0A0A6L1C0_CANAX; tr|A0A0A6KWM0|A0A0A6KWM0_CANAX; tr|A0A0A6K9D4|A0A0A6K9D4_CANAX; tr|A0A0A6K455|A0A0A6K455_CANAX; tr|A0A0A6JWU4|A0A0A6JWU4_CANAX; tr|A0A0A6J9A0|A0A0A6J9A0_CANAX; tr|A0A0A6J199|A0A0A6J19…	Elongation factor 1-alpha OS=Candida albicans (strain WO-1) GN=CAWG_00588 PE=3 SV=1; Elongation factor 1-alpha OS=Candida albicans (strain SC5314 / ATCC MYA-2876) GN=I503_00814 PE=3 SV=1; Elongation factor 1-alpha OS=Candida albicans (strain SC5314 / ATCC MYA-2876) GN=W5Q_02251 PE=3 SV=1; Elongation factor 1-alpha OS=Candida albicans P78042 GN=MGS_00808 PE=3 SV=1; Elongation factor 1-alpha OS=Can…			0	99	SGKVTGKTLLEAIDAIEPPTRPTDKPLRLPLQDVYK		missed K-V@3; missed K-T@7; missed R-L@28	-0.019303	3959.19	660.872	3959.21	660.876	6	22	1.1.1.2185.9	1	33.4524	3614.49	33.6336
1	93.17	93.17	63.97	63.97	63.97	tr|C4YDJ3|C4YDJ3_CANAW; tr|A0A0A6Q741|A0A0A6Q741_CANAL; tr|A0A0A6M7H0|A0A0A6M7H0_CANAL; tr|A0A0A6M386|A0A0A6M386_CANAX; tr|A0A0A6LGT0|A0A0A6LGT0_CANAX; tr|A0A0A6L5Y0|A0A0A6L5Y0_CANAX; tr|A0A0A6L1C0|A0A0A6L1C0_CANAX; tr|A0A0A6KWM0|A0A0A6KWM0_CANAX; tr|A0A0A6K9D4|A0A0A6K9D4_CANAX; tr|A0A0A6K455|A0A0A6K455_CANAX; tr|A0A0A6JWU4|A0A0A6JWU4_CANAX; tr|A0A0A6J9A0|A0A0A6J9A0_CANAX; tr|A0A0A6J199|A0A0A6J19…	Elongation factor 1-alpha OS=Candida albicans (strain WO-1) GN=CAWG_00588 PE=3 SV=1; Elongation factor 1-alpha OS=Candida albicans (strain SC5314 / ATCC MYA-2876) GN=I503_00814 PE=3 SV=1; Elongation factor 1-alpha OS=Candida albicans (strain SC5314 / ATCC MYA-2876) GN=W5Q_02251 PE=3 SV=1; Elongation factor 1-alpha OS=Candida albicans P78042 GN=MGS_00808 PE=3 SV=1; Elongation factor 1-alpha OS=Can…			0	99	SGKVTGKTLLEAIDAIEPPTRPTDKPLRLPLQDVYK		missed K-V@3; missed K-T@7; missed R-L@28	-0.019303	3959.19	660.872	3959.21	660.876	6	21	1.1.1.2185.10	1	33.4541	3614.49	33.6336
1	93.17	93.17	63.97	63.97	63.97	tr|C4YDJ3|C4YDJ3_CANAW; tr|A0A0A6Q741|A0A0A6Q741_CANAL; tr|A0A0A6M7H0|A0A0A6M7H0_CANAL; tr|A0A0A6M386|A0A0A6M386_CANAX; tr|A0A0A6LGT0|A0A0A6LGT0_CANAX; tr|A0A0A6L5Y0|A0A0A6L5Y0_CANAX; tr|A0A0A6L1C0|A0A0A6L1C0_CANAX; tr|A0A0A6KWM0|A0A0A6KWM0_CANAX; tr|A0A0A6K9D4|A0A0A6K9D4_CANAX; tr|A0A0A6K455|A0A0A6K455_CANAX; tr|A0A0A6JWU4|A0A0A6JWU4_CANAX; tr|A0A0A6J9A0|A0A0A6J9A0_CANAX; tr|A0A0A6J199|A0A0A6J19…	Elongation factor 1-alpha OS=Candida albicans (strain WO-1) GN=CAWG_00588 PE=3 SV=1; Elongation factor 1-alpha OS=Candida albicans (strain SC5314 / ATCC MYA-2876) GN=I503_00814 PE=3 SV=1; Elongation factor 1-alpha OS=Candida albicans (strain SC5314 / ATCC MYA-2876) GN=W5Q_02251 PE=3 SV=1; Elongation factor 1-alpha OS=Candida albicans P78042 GN=MGS_00808 PE=3 SV=1; Elongation factor 1-alpha OS=Can…			0	99	SGKVTGKTLLEAIDAIEPPTRPTDKPLRLPLQDVYK		missed K-V@3; missed K-T@7; missed R-L@28	-0.0154366	3959.19	792.846	3959.21	792.849	5	22	1.1.1.2188.19	1	33.5892	2113.25	33.6336
1	93.17	93.17	63.97	63.97	63.97	tr|C4YDJ3|C4YDJ3_CANAW; tr|A0A0A6Q741|A0A0A6Q741_CANAL; tr|A0A0A6M7H0|A0A0A6M7H0_CANAL; tr|A0A0A6M386|A0A0A6M386_CANAX; tr|A0A0A6LGT0|A0A0A6LGT0_CANAX; tr|A0A0A6L5Y0|A0A0A6L5Y0_CANAX; tr|A0A0A6L1C0|A0A0A6L1C0_CANAX; tr|A0A0A6KWM0|A0A0A6KWM0_CANAX; tr|A0A0A6K9D4|A0A0A6K9D4_CANAX; tr|A0A0A6K455|A0A0A6K455_CANAX; tr|A0A0A6JWU4|A0A0A6JWU4_CANAX; tr|A0A0A6J9A0|A0A0A6J9A0_CANAX; tr|A0A0A6J199|A0A0A6J19…	Elongation factor 1-alpha OS=Candida albicans (strain WO-1) GN=CAWG_00588 PE=3 SV=1; Elongation factor 1-alpha OS=Candida albicans (strain SC5314 / ATCC MYA-2876) GN=I503_00814 PE=3 SV=1; Elongation factor 1-alpha OS=Candida albicans (strain SC5314 / ATCC MYA-2876) GN=W5Q_02251 PE=3 SV=1; Elongation factor 1-alpha OS=Candida albicans P78042 GN=MGS_00808 PE=3 SV=1; Elongation factor 1-alpha OS=Can…			0	99	SGKVTGKTLLEAIDAIEPPTRPTDKPLRLPLQDVYK		missed K-V@3; missed K-T@7; missed R-L@28	-0.019303	3959.19	660.872	3959.21	660.876	6	25	1.1.1.2191.9	1	33.6926	3614.49	33.6336
1	93.17	93.17	63.97	63.97	63.97	tr|C4YDJ3|C4YDJ3_CANAW; tr|A0A0A6Q741|A0A0A6Q741_CANAL; tr|A0A0A6M7H0|A0A0A6M7H0_CANAL; tr|A0A0A6M386|A0A0A6M386_CANAX; tr|A0A0A6LGT0|A0A0A6LGT0_CANAX; tr|A0A0A6L5Y0|A0A0A6L5Y0_CANAX; tr|A0A0A6L1C0|A0A0A6L1C0_CANAX; tr|A0A0A6KWM0|A0A0A6KWM0_CANAX; tr|A0A0A6K9D4|A0A0A6K9D4_CANAX; tr|A0A0A6K455|A0A0A6K455_CANAX; tr|A0A0A6JWU4|A0A0A6JWU4_CANAX; tr|A0A0A6J9A0|A0A0A6J9A0_CANAX; tr|A0A0A6J199|A0A0A6J19…	Elongation factor 1-alpha OS=Candida albicans (strain WO-1) GN=CAWG_00588 PE=3 SV=1; Elongation factor 1-alpha OS=Candida albicans (strain SC5314 / ATCC MYA-2876) GN=I503_00814 PE=3 SV=1; Elongation factor 1-alpha OS=Candida albicans (strain SC5314 / ATCC MYA-2876) GN=W5Q_02251 PE=3 SV=1; Elongation factor 1-alpha OS=Candida albicans P78042 GN=MGS_00808 PE=3 SV=1; Elongation factor 1-alpha OS=Can…			0	99	SGKVTGKTLLEAIDAIEPPTRPTDKPLRLPLQDVYK		missed K-V@3; missed K-T@7; missed R-L@28	-0.019303	3959.19	660.872	3959.21	660.876	6	18	1.1.1.2194.15	1	33.8228	3614.49	33.6336
1	93.17	93.17	63.97	63.97	63.97	tr|C4YDJ3|C4YDJ3_CANAW; tr|A0A0A6Q741|A0A0A6Q741_CANAL; tr|A0A0A6M7H0|A0A0A6M7H0_CANAL; tr|A0A0A6M386|A0A0A6M386_CANAX; tr|A0A0A6LGT0|A0A0A6LGT0_CANAX; tr|A0A0A6L5Y0|A0A0A6L5Y0_CANAX; tr|A0A0A6L1C0|A0A0A6L1C0_CANAX; tr|A0A0A6KWM0|A0A0A6KWM0_CANAX; tr|A0A0A6K9D4|A0A0A6K9D4_CANAX; tr|A0A0A6K455|A0A0A6K455_CANAX; tr|A0A0A6JWU4|A0A0A6JWU4_CANAX; tr|A0A0A6J9A0|A0A0A6J9A0_CANAX; tr|A0A0A6J199|A0A0A6J19…	Elongation factor 1-alpha OS=Candida albicans (strain WO-1) GN=CAWG_00588 PE=3 SV=1; Elongation factor 1-alpha OS=Candida albicans (strain SC5314 / ATCC MYA-2876) GN=I503_00814 PE=3 SV=1; Elongation factor 1-alpha OS=Candida albicans (strain SC5314 / ATCC MYA-2876) GN=W5Q_02251 PE=3 SV=1; Elongation factor 1-alpha OS=Candida albicans P78042 GN=MGS_00808 PE=3 SV=1; Elongation factor 1-alpha OS=Can…			0	99	SGKVTGKTLLEAIDAIEPPTRPTDKPLRLPLQDVYK		missed K-V@3; missed K-T@7; missed R-L@28	-0.0154366	3959.19	792.846	3959.21	792.849	5	17	1.1.1.2195.15	1	33.8627	2113.25	33.6336
1	93.17	93.17	63.97	63.97	63.97	tr|C4YDJ3|C4YDJ3_CANAW; tr|A0A0A6Q741|A0A0A6Q741_CANAL; tr|A0A0A6M7H0|A0A0A6M7H0_CANAL; tr|A0A0A6M386|A0A0A6M386_CANAX; tr|A0A0A6LGT0|A0A0A6LGT0_CANAX; tr|A0A0A6L5Y0|A0A0A6L5Y0_CANAX; tr|A0A0A6L1C0|A0A0A6L1C0_CANAX; tr|A0A0A6KWM0|A0A0A6KWM0_CANAX; tr|A0A0A6K9D4|A0A0A6K9D4_CANAX; tr|A0A0A6K455|A0A0A6K455_CANAX; tr|A0A0A6JWU4|A0A0A6JWU4_CANAX; tr|A0A0A6J9A0|A0A0A6J9A0_CANAX; tr|A0A0A6J199|A0A0A6J19…	Elongation factor 1-alpha OS=Candida albicans (strain WO-1) GN=CAWG_00588 PE=3 SV=1; Elongation factor 1-alpha OS=Candida albicans (strain SC5314 / ATCC MYA-2876) GN=I503_00814 PE=3 SV=1; Elongation factor 1-alpha OS=Candida albicans (strain SC5314 / ATCC MYA-2876) GN=W5Q_02251 PE=3 SV=1; Elongation factor 1-alpha OS=Candida albicans P78042 GN=MGS_00808 PE=3 SV=1; Elongation factor 1-alpha OS=Can…			0	99	SVEMHHEQLAEGVPGDNVGFNVK	Oxidation(M)@4		-0.00491508	2508.17	628.049	2508.17	628.05	4	24	1.1.1.1811.15	1	18.5056	83613	18.7565
1	93.17	93.17	63.97	63.97	63.97	tr|C4YDJ3|C4YDJ3_CANAW; tr|A0A0A6Q741|A0A0A6Q741_CANAL; tr|A0A0A6M7H0|A0A0A6M7H0_CANAL; tr|A0A0A6M386|A0A0A6M386_CANAX; tr|A0A0A6LGT0|A0A0A6LGT0_CANAX; tr|A0A0A6L5Y0|A0A0A6L5Y0_CANAX; tr|A0A0A6L1C0|A0A0A6L1C0_CANAX; tr|A0A0A6KWM0|A0A0A6KWM0_CANAX; tr|A0A0A6K9D4|A0A0A6K9D4_CANAX; tr|A0A0A6K455|A0A0A6K455_CANAX; tr|A0A0A6JWU4|A0A0A6JWU4_CANAX; tr|A0A0A6J9A0|A0A0A6J9A0_CANAX; tr|A0A0A6J199|A0A0A6J19…	Elongation factor 1-alpha OS=Candida albicans (strain WO-1) GN=CAWG_00588 PE=3 SV=1; Elongation factor 1-alpha OS=Candida albicans (strain SC5314 / ATCC MYA-2876) GN=I503_00814 PE=3 SV=1; Elongation factor 1-alpha OS=Candida albicans (strain SC5314 / ATCC MYA-2876) GN=W5Q_02251 PE=3 SV=1; Elongation factor 1-alpha OS=Candida albicans P78042 GN=MGS_00808 PE=3 SV=1; Elongation factor 1-alpha OS=Can…			0	99	SVEMHHEQLAEGVPGDNVGFNVK	Oxidation(M)@4		-0.00491508	2508.17	628.049	2508.17	628.05	4	24	1.1.1.1814.15	1	18.626	83613	18.7565
1	93.17	93.17	63.97	63.97	63.97	tr|C4YDJ3|C4YDJ3_CANAW; tr|A0A0A6Q741|A0A0A6Q741_CANAL; tr|A0A0A6M7H0|A0A0A6M7H0_CANAL; tr|A0A0A6M386|A0A0A6M386_CANAX; tr|A0A0A6LGT0|A0A0A6LGT0_CANAX; tr|A0A0A6L5Y0|A0A0A6L5Y0_CANAX; tr|A0A0A6L1C0|A0A0A6L1C0_CANAX; tr|A0A0A6KWM0|A0A0A6KWM0_CANAX; tr|A0A0A6K9D4|A0A0A6K9D4_CANAX; tr|A0A0A6K455|A0A0A6K455_CANAX; tr|A0A0A6JWU4|A0A0A6JWU4_CANAX; tr|A0A0A6J9A0|A0A0A6J9A0_CANAX; tr|A0A0A6J199|A0A0A6J19…	Elongation factor 1-alpha OS=Candida albicans (strain WO-1) GN=CAWG_00588 PE=3 SV=1; Elongation factor 1-alpha OS=Candida albicans (strain SC5314 / ATCC MYA-2876) GN=I503_00814 PE=3 SV=1; Elongation factor 1-alpha OS=Candida albicans (strain SC5314 / ATCC MYA-2876) GN=W5Q_02251 PE=3 SV=1; Elongation factor 1-alpha OS=Candida albicans P78042 GN=MGS_00808 PE=3 SV=1; Elongation factor 1-alpha OS=Can…			0	99	SVEMHHEQLAEGVPGDNVGFNVK	Oxidation(M)@4		-0.00491508	2508.17	628.049	2508.17	628.05	4	22	1.1.1.1817.15	1	18.7455	83613	18.7565
1	93.17	93.17	63.97	63.97	63.97	tr|C4YDJ3|C4YDJ3_CANAW; tr|A0A0A6Q741|A0A0A6Q741_CANAL; tr|A0A0A6M7H0|A0A0A6M7H0_CANAL; tr|A0A0A6M386|A0A0A6M386_CANAX; tr|A0A0A6LGT0|A0A0A6LGT0_CANAX; tr|A0A0A6L5Y0|A0A0A6L5Y0_CANAX; tr|A0A0A6L1C0|A0A0A6L1C0_CANAX; tr|A0A0A6KWM0|A0A0A6KWM0_CANAX; tr|A0A0A6K9D4|A0A0A6K9D4_CANAX; tr|A0A0A6K455|A0A0A6K455_CANAX; tr|A0A0A6JWU4|A0A0A6JWU4_CANAX; tr|A0A0A6J9A0|A0A0A6J9A0_CANAX; tr|A0A0A6J199|A0A0A6J19…	Elongation factor 1-alpha OS=Candida albicans (strain WO-1) GN=CAWG_00588 PE=3 SV=1; Elongation factor 1-alpha OS=Candida albicans (strain SC5314 / ATCC MYA-2876) GN=I503_00814 PE=3 SV=1; Elongation factor 1-alpha OS=Candida albicans (strain SC5314 / ATCC MYA-2876) GN=W5Q_02251 PE=3 SV=1; Elongation factor 1-alpha OS=Candida albicans P78042 GN=MGS_00808 PE=3 SV=1; Elongation factor 1-alpha OS=Can…			0	99	SVEMHHEQLAEGVPGDNVGFNVK	Oxidation(M)@4		-0.00491508	2508.17	628.049	2508.17	628.05	4	17	1.1.1.1820.13	1	18.8604	83613	18.7565
1	93.17	93.17	63.97	63.97	63.97	tr|C4YDJ3|C4YDJ3_CANAW; tr|A0A0A6Q741|A0A0A6Q741_CANAL; tr|A0A0A6M7H0|A0A0A6M7H0_CANAL; tr|A0A0A6M386|A0A0A6M386_CANAX; tr|A0A0A6LGT0|A0A0A6LGT0_CANAX; tr|A0A0A6L5Y0|A0A0A6L5Y0_CANAX; tr|A0A0A6L1C0|A0A0A6L1C0_CANAX; tr|A0A0A6KWM0|A0A0A6KWM0_CANAX; tr|A0A0A6K9D4|A0A0A6K9D4_CANAX; tr|A0A0A6K455|A0A0A6K455_CANAX; tr|A0A0A6JWU4|A0A0A6JWU4_CANAX; tr|A0A0A6J9A0|A0A0A6J9A0_CANAX; tr|A0A0A6J199|A0A0A6J19…	Elongation factor 1-alpha OS=Candida albicans (strain WO-1) GN=CAWG_00588 PE=3 SV=1; Elongation factor 1-alpha OS=Candida albicans (strain SC5314 / ATCC MYA-2876) GN=I503_00814 PE=3 SV=1; Elongation factor 1-alpha OS=Candida albicans (strain SC5314 / ATCC MYA-2876) GN=W5Q_02251 PE=3 SV=1; Elongation factor 1-alpha OS=Candida albicans P78042 GN=MGS_00808 PE=3 SV=1; Elongation factor 1-alpha OS=Can…			0	99	SVEMHHEQLAEGVPGDNVGFNVK	Oxidation(M)@4		-0.00491508	2508.17	628.049	2508.17	628.05	4	24	1.1.1.1820.14	1	18.862	83613	18.7565
1	93.17	93.17	63.97	63.97	63.97	tr|C4YDJ3|C4YDJ3_CANAW; tr|A0A0A6Q741|A0A0A6Q741_CANAL; tr|A0A0A6M7H0|A0A0A6M7H0_CANAL; tr|A0A0A6M386|A0A0A6M386_CANAX; tr|A0A0A6LGT0|A0A0A6LGT0_CANAX; tr|A0A0A6L5Y0|A0A0A6L5Y0_CANAX; tr|A0A0A6L1C0|A0A0A6L1C0_CANAX; tr|A0A0A6KWM0|A0A0A6KWM0_CANAX; tr|A0A0A6K9D4|A0A0A6K9D4_CANAX; tr|A0A0A6K455|A0A0A6K455_CANAX; tr|A0A0A6JWU4|A0A0A6JWU4_CANAX; tr|A0A0A6J9A0|A0A0A6J9A0_CANAX; tr|A0A0A6J199|A0A0A6J19…	Elongation factor 1-alpha OS=Candida albicans (strain WO-1) GN=CAWG_00588 PE=3 SV=1; Elongation factor 1-alpha OS=Candida albicans (strain SC5314 / ATCC MYA-2876) GN=I503_00814 PE=3 SV=1; Elongation factor 1-alpha OS=Candida albicans (strain SC5314 / ATCC MYA-2876) GN=W5Q_02251 PE=3 SV=1; Elongation factor 1-alpha OS=Candida albicans P78042 GN=MGS_00808 PE=3 SV=1; Elongation factor 1-alpha OS=Can…			0	99	SVEMHHEQLAEGVPGDNVGFNVK	Oxidation(M)@4		-0.00491508	2508.17	628.049	2508.17	628.05	4	23	1.1.1.1823.15	1	18.982	83613	18.7565
1	93.17	93.17	63.97	63.97	63.97	tr|C4YDJ3|C4YDJ3_CANAW; tr|A0A0A6Q741|A0A0A6Q741_CANAL; tr|A0A0A6M7H0|A0A0A6M7H0_CANAL; tr|A0A0A6M386|A0A0A6M386_CANAX; tr|A0A0A6LGT0|A0A0A6LGT0_CANAX; tr|A0A0A6L5Y0|A0A0A6L5Y0_CANAX; tr|A0A0A6L1C0|A0A0A6L1C0_CANAX; tr|A0A0A6KWM0|A0A0A6KWM0_CANAX; tr|A0A0A6K9D4|A0A0A6K9D4_CANAX; tr|A0A0A6K455|A0A0A6K455_CANAX; tr|A0A0A6JWU4|A0A0A6JWU4_CANAX; tr|A0A0A6J9A0|A0A0A6J9A0_CANAX; tr|A0A0A6J199|A0A0A6J19…	Elongation factor 1-alpha OS=Candida albicans (strain WO-1) GN=CAWG_00588 PE=3 SV=1; Elongation factor 1-alpha OS=Candida albicans (strain SC5314 / ATCC MYA-2876) GN=I503_00814 PE=3 SV=1; Elongation factor 1-alpha OS=Candida albicans (strain SC5314 / ATCC MYA-2876) GN=W5Q_02251 PE=3 SV=1; Elongation factor 1-alpha OS=Candida albicans P78042 GN=MGS_00808 PE=3 SV=1; Elongation factor 1-alpha OS=Can…			0	99	SVEMHHEQLAEGVPGDNVGFNVK	Oxidation(M)@4		-0.00491508	2508.17	628.049	2508.17	628.05	4	21	1.1.1.1826.17	1	19.1052	83613	18.7565
1	93.17	93.17	63.97	63.97	63.97	tr|C4YDJ3|C4YDJ3_CANAW; tr|A0A0A6Q741|A0A0A6Q741_CANAL; tr|A0A0A6M7H0|A0A0A6M7H0_CANAL; tr|A0A0A6M386|A0A0A6M386_CANAX; tr|A0A0A6LGT0|A0A0A6LGT0_CANAX; tr|A0A0A6L5Y0|A0A0A6L5Y0_CANAX; tr|A0A0A6L1C0|A0A0A6L1C0_CANAX; tr|A0A0A6KWM0|A0A0A6KWM0_CANAX; tr|A0A0A6K9D4|A0A0A6K9D4_CANAX; tr|A0A0A6K455|A0A0A6K455_CANAX; tr|A0A0A6JWU4|A0A0A6JWU4_CANAX; tr|A0A0A6J9A0|A0A0A6J9A0_CANAX; tr|A0A0A6J199|A0A0A6J19…	Elongation factor 1-alpha OS=Candida albicans (strain WO-1) GN=CAWG_00588 PE=3 SV=1; Elongation factor 1-alpha OS=Candida albicans (strain SC5314 / ATCC MYA-2876) GN=I503_00814 PE=3 SV=1; Elongation factor 1-alpha OS=Candida albicans (strain SC5314 / ATCC MYA-2876) GN=W5Q_02251 PE=3 SV=1; Elongation factor 1-alpha OS=Candida albicans P78042 GN=MGS_00808 PE=3 SV=1; Elongation factor 1-alpha OS=Can…			0	99	SVEMHHEQLAEGVPGDNVGFNVK	Oxidation(M)@4; Deamidated(N)@21		0.0203924	2509.18	837.399	2509.15	837.392	3	19	1.1.1.1820.18	1	18.8687	21274.3	18.7565
1	93.17	93.17	63.97	63.97	63.97	tr|C4YDJ3|C4YDJ3_CANAW; tr|A0A0A6Q741|A0A0A6Q741_CANAL; tr|A0A0A6M7H0|A0A0A6M7H0_CANAL; tr|A0A0A6M386|A0A0A6M386_CANAX; tr|A0A0A6LGT0|A0A0A6LGT0_CANAX; tr|A0A0A6L5Y0|A0A0A6L5Y0_CANAX; tr|A0A0A6L1C0|A0A0A6L1C0_CANAX; tr|A0A0A6KWM0|A0A0A6KWM0_CANAX; tr|A0A0A6K9D4|A0A0A6K9D4_CANAX; tr|A0A0A6K455|A0A0A6K455_CANAX; tr|A0A0A6JWU4|A0A0A6JWU4_CANAX; tr|A0A0A6J9A0|A0A0A6J9A0_CANAX; tr|A0A0A6J199|A0A0A6J19…	Elongation factor 1-alpha OS=Candida albicans (strain WO-1) GN=CAWG_00588 PE=3 SV=1; Elongation factor 1-alpha OS=Candida albicans (strain SC5314 / ATCC MYA-2876) GN=I503_00814 PE=3 SV=1; Elongation factor 1-alpha OS=Candida albicans (strain SC5314 / ATCC MYA-2876) GN=W5Q_02251 PE=3 SV=1; Elongation factor 1-alpha OS=Candida albicans P78042 GN=MGS_00808 PE=3 SV=1; Elongation factor 1-alpha OS=Can…			0	99	SVEMHHEQLAEGVPGDNVGFNVK	Oxidation(M)@4; Deamidated(N)@17		-0.00360729	2509.15	628.295	2509.15	628.296	4	20	1.1.1.1832.13	1	19.3387	15681.1	19.4725
1	93.17	93.17	63.97	63.97	63.97	tr|C4YDJ3|C4YDJ3_CANAW; tr|A0A0A6Q741|A0A0A6Q741_CANAL; tr|A0A0A6M7H0|A0A0A6M7H0_CANAL; tr|A0A0A6M386|A0A0A6M386_CANAX; tr|A0A0A6LGT0|A0A0A6LGT0_CANAX; tr|A0A0A6L5Y0|A0A0A6L5Y0_CANAX; tr|A0A0A6L1C0|A0A0A6L1C0_CANAX; tr|A0A0A6KWM0|A0A0A6KWM0_CANAX; tr|A0A0A6K9D4|A0A0A6K9D4_CANAX; tr|A0A0A6K455|A0A0A6K455_CANAX; tr|A0A0A6JWU4|A0A0A6JWU4_CANAX; tr|A0A0A6J9A0|A0A0A6J9A0_CANAX; tr|A0A0A6J199|A0A0A6J19…	Elongation factor 1-alpha OS=Candida albicans (strain WO-1) GN=CAWG_00588 PE=3 SV=1; Elongation factor 1-alpha OS=Candida albicans (strain SC5314 / ATCC MYA-2876) GN=I503_00814 PE=3 SV=1; Elongation factor 1-alpha OS=Candida albicans (strain SC5314 / ATCC MYA-2876) GN=W5Q_02251 PE=3 SV=1; Elongation factor 1-alpha OS=Candida albicans P78042 GN=MGS_00808 PE=3 SV=1; Elongation factor 1-alpha OS=Can…			0	99	SVEMHHEQLAEGVPGDNVGFNVK	Oxidation(M)@4; Deamidated(Q)@8		-0.00360729	2509.15	628.295	2509.15	628.296	4	23	1.1.1.1835.13	1	19.4581	15681.1	19.4725
1	93.17	93.17	63.97	63.97	63.97	tr|C4YDJ3|C4YDJ3_CANAW; tr|A0A0A6Q741|A0A0A6Q741_CANAL; tr|A0A0A6M7H0|A0A0A6M7H0_CANAL; tr|A0A0A6M386|A0A0A6M386_CANAX; tr|A0A0A6LGT0|A0A0A6LGT0_CANAX; tr|A0A0A6L5Y0|A0A0A6L5Y0_CANAX; tr|A0A0A6L1C0|A0A0A6L1C0_CANAX; tr|A0A0A6KWM0|A0A0A6KWM0_CANAX; tr|A0A0A6K9D4|A0A0A6K9D4_CANAX; tr|A0A0A6K455|A0A0A6K455_CANAX; tr|A0A0A6JWU4|A0A0A6JWU4_CANAX; tr|A0A0A6J9A0|A0A0A6J9A0_CANAX; tr|A0A0A6J199|A0A0A6J19…	Elongation factor 1-alpha OS=Candida albicans (strain WO-1) GN=CAWG_00588 PE=3 SV=1; Elongation factor 1-alpha OS=Candida albicans (strain SC5314 / ATCC MYA-2876) GN=I503_00814 PE=3 SV=1; Elongation factor 1-alpha OS=Candida albicans (strain SC5314 / ATCC MYA-2876) GN=W5Q_02251 PE=3 SV=1; Elongation factor 1-alpha OS=Candida albicans P78042 GN=MGS_00808 PE=3 SV=1; Elongation factor 1-alpha OS=Can…			0	99	SVEMHHEQLAEGVPGDNVGFNVK	Oxidation(M)@4; Deamidated(Q)@8		-0.00360729	2509.15	628.295	2509.15	628.296	4	22	1.1.1.1838.15	1	19.5811	15681.1	19.4725
1	93.17	93.17	63.97	63.97	63.97	tr|C4YDJ3|C4YDJ3_CANAW; tr|A0A0A6Q741|A0A0A6Q741_CANAL; tr|A0A0A6M7H0|A0A0A6M7H0_CANAL; tr|A0A0A6M386|A0A0A6M386_CANAX; tr|A0A0A6LGT0|A0A0A6LGT0_CANAX; tr|A0A0A6L5Y0|A0A0A6L5Y0_CANAX; tr|A0A0A6L1C0|A0A0A6L1C0_CANAX; tr|A0A0A6KWM0|A0A0A6KWM0_CANAX; tr|A0A0A6K9D4|A0A0A6K9D4_CANAX; tr|A0A0A6K455|A0A0A6K455_CANAX; tr|A0A0A6JWU4|A0A0A6JWU4_CANAX; tr|A0A0A6J9A0|A0A0A6J9A0_CANAX; tr|A0A0A6J199|A0A0A6J19…	Elongation factor 1-alpha OS=Candida albicans (strain WO-1) GN=CAWG_00588 PE=3 SV=1; Elongation factor 1-alpha OS=Candida albicans (strain SC5314 / ATCC MYA-2876) GN=I503_00814 PE=3 SV=1; Elongation factor 1-alpha OS=Candida albicans (strain SC5314 / ATCC MYA-2876) GN=W5Q_02251 PE=3 SV=1; Elongation factor 1-alpha OS=Candida albicans P78042 GN=MGS_00808 PE=3 SV=1; Elongation factor 1-alpha OS=Can…			0	99	SVEMHHEQLAEGVPGDNVGFNVK	Oxidation(M)@4; Deamidated(Q)@8		-0.00360729	2509.15	628.295	2509.15	628.296	4	22	1.1.1.1841.12	1	19.6962	15681.1	19.4725
1	93.17	93.17	63.97	63.97	63.97	tr|C4YDJ3|C4YDJ3_CANAW; tr|A0A0A6Q741|A0A0A6Q741_CANAL; tr|A0A0A6M7H0|A0A0A6M7H0_CANAL; tr|A0A0A6M386|A0A0A6M386_CANAX; tr|A0A0A6LGT0|A0A0A6LGT0_CANAX; tr|A0A0A6L5Y0|A0A0A6L5Y0_CANAX; tr|A0A0A6L1C0|A0A0A6L1C0_CANAX; tr|A0A0A6KWM0|A0A0A6KWM0_CANAX; tr|A0A0A6K9D4|A0A0A6K9D4_CANAX; tr|A0A0A6K455|A0A0A6K455_CANAX; tr|A0A0A6JWU4|A0A0A6JWU4_CANAX; tr|A0A0A6J9A0|A0A0A6J9A0_CANAX; tr|A0A0A6J199|A0A0A6J19…	Elongation factor 1-alpha OS=Candida albicans (strain WO-1) GN=CAWG_00588 PE=3 SV=1; Elongation factor 1-alpha OS=Candida albicans (strain SC5314 / ATCC MYA-2876) GN=I503_00814 PE=3 SV=1; Elongation factor 1-alpha OS=Candida albicans (strain SC5314 / ATCC MYA-2876) GN=W5Q_02251 PE=3 SV=1; Elongation factor 1-alpha OS=Candida albicans P78042 GN=MGS_00808 PE=3 SV=1; Elongation factor 1-alpha OS=Can…			0	99	SVEMHHEQLAEGVPGDNVGFNVK	Oxidation(M)@4; Deamidated(Q)@8		-0.00157963	2509.15	837.391	2509.15	837.392	3	20	1.1.1.1842.18	1	19.7464	7823.68	19.4725
1	93.17	93.17	63.97	63.97	63.97	tr|C4YDJ3|C4YDJ3_CANAW; tr|A0A0A6Q741|A0A0A6Q741_CANAL; tr|A0A0A6M7H0|A0A0A6M7H0_CANAL; tr|A0A0A6M386|A0A0A6M386_CANAX; tr|A0A0A6LGT0|A0A0A6LGT0_CANAX; tr|A0A0A6L5Y0|A0A0A6L5Y0_CANAX; tr|A0A0A6L1C0|A0A0A6L1C0_CANAX; tr|A0A0A6KWM0|A0A0A6KWM0_CANAX; tr|A0A0A6K9D4|A0A0A6K9D4_CANAX; tr|A0A0A6K455|A0A0A6K455_CANAX; tr|A0A0A6JWU4|A0A0A6JWU4_CANAX; tr|A0A0A6J9A0|A0A0A6J9A0_CANAX; tr|A0A0A6J199|A0A0A6J19…	Elongation factor 1-alpha OS=Candida albicans (strain WO-1) GN=CAWG_00588 PE=3 SV=1; Elongation factor 1-alpha OS=Candida albicans (strain SC5314 / ATCC MYA-2876) GN=I503_00814 PE=3 SV=1; Elongation factor 1-alpha OS=Candida albicans (strain SC5314 / ATCC MYA-2876) GN=W5Q_02251 PE=3 SV=1; Elongation factor 1-alpha OS=Candida albicans P78042 GN=MGS_00808 PE=3 SV=1; Elongation factor 1-alpha OS=Can…			0	99	SVEMHHEQLAEGVPGDNVGFNVK	Oxidation(M)@4; Deamidated(Q)@8		-0.00360729	2509.15	628.295	2509.15	628.296	4	21	1.1.1.1844.15	1	19.8217	15681.1	19.4725
1	93.17	93.17	63.97	63.97	63.97	tr|C4YDJ3|C4YDJ3_CANAW; tr|A0A0A6Q741|A0A0A6Q741_CANAL; tr|A0A0A6M7H0|A0A0A6M7H0_CANAL; tr|A0A0A6M386|A0A0A6M386_CANAX; tr|A0A0A6LGT0|A0A0A6LGT0_CANAX; tr|A0A0A6L5Y0|A0A0A6L5Y0_CANAX; tr|A0A0A6L1C0|A0A0A6L1C0_CANAX; tr|A0A0A6KWM0|A0A0A6KWM0_CANAX; tr|A0A0A6K9D4|A0A0A6K9D4_CANAX; tr|A0A0A6K455|A0A0A6K455_CANAX; tr|A0A0A6JWU4|A0A0A6JWU4_CANAX; tr|A0A0A6J9A0|A0A0A6J9A0_CANAX; tr|A0A0A6J199|A0A0A6J19…	Elongation factor 1-alpha OS=Candida albicans (strain WO-1) GN=CAWG_00588 PE=3 SV=1; Elongation factor 1-alpha OS=Candida albicans (strain SC5314 / ATCC MYA-2876) GN=I503_00814 PE=3 SV=1; Elongation factor 1-alpha OS=Candida albicans (strain SC5314 / ATCC MYA-2876) GN=W5Q_02251 PE=3 SV=1; Elongation factor 1-alpha OS=Candida albicans P78042 GN=MGS_00808 PE=3 SV=1; Elongation factor 1-alpha OS=Can…			0	99	SVEMHHEQLAEGVPGDNVGFNVK	Oxidation(M)@4; Cation:Na(E)@11		0.0106505	2530.16	844.395	2530.15	844.391	3	16	1.1.1.1817.19	1	18.7521	872.936	18.7565
1	93.17	93.17	63.97	63.97	63.97	tr|C4YDJ3|C4YDJ3_CANAW; tr|A0A0A6Q741|A0A0A6Q741_CANAL; tr|A0A0A6M7H0|A0A0A6M7H0_CANAL; tr|A0A0A6M386|A0A0A6M386_CANAX; tr|A0A0A6LGT0|A0A0A6LGT0_CANAX; tr|A0A0A6L5Y0|A0A0A6L5Y0_CANAX; tr|A0A0A6L1C0|A0A0A6L1C0_CANAX; tr|A0A0A6KWM0|A0A0A6KWM0_CANAX; tr|A0A0A6K9D4|A0A0A6K9D4_CANAX; tr|A0A0A6K455|A0A0A6K455_CANAX; tr|A0A0A6JWU4|A0A0A6JWU4_CANAX; tr|A0A0A6J9A0|A0A0A6J9A0_CANAX; tr|A0A0A6J199|A0A0A6J19…	Elongation factor 1-alpha OS=Candida albicans (strain WO-1) GN=CAWG_00588 PE=3 SV=1; Elongation factor 1-alpha OS=Candida albicans (strain SC5314 / ATCC MYA-2876) GN=I503_00814 PE=3 SV=1; Elongation factor 1-alpha OS=Candida albicans (strain SC5314 / ATCC MYA-2876) GN=W5Q_02251 PE=3 SV=1; Elongation factor 1-alpha OS=Candida albicans P78042 GN=MGS_00808 PE=3 SV=1; Elongation factor 1-alpha OS=Can…			0	99	SVEMHHEQLAEGVPGDNVGFNVK	Oxidation(M)@4; Deamidated(Q)@8; Deamidated(N)@17		0.00551273	2510.14	628.543	2510.14	628.542	4	15	1.1.1.1853.13	1	20.1794	1203	20.1537
1	93.17	93.17	63.97	63.97	63.97	tr|C4YDJ3|C4YDJ3_CANAW; tr|A0A0A6Q741|A0A0A6Q741_CANAL; tr|A0A0A6M7H0|A0A0A6M7H0_CANAL; tr|A0A0A6M386|A0A0A6M386_CANAX; tr|A0A0A6LGT0|A0A0A6LGT0_CANAX; tr|A0A0A6L5Y0|A0A0A6L5Y0_CANAX; tr|A0A0A6L1C0|A0A0A6L1C0_CANAX; tr|A0A0A6KWM0|A0A0A6KWM0_CANAX; tr|A0A0A6K9D4|A0A0A6K9D4_CANAX; tr|A0A0A6K455|A0A0A6K455_CANAX; tr|A0A0A6JWU4|A0A0A6JWU4_CANAX; tr|A0A0A6J9A0|A0A0A6J9A0_CANAX; tr|A0A0A6J199|A0A0A6J19…	Elongation factor 1-alpha OS=Candida albicans (strain WO-1) GN=CAWG_00588 PE=3 SV=1; Elongation factor 1-alpha OS=Candida albicans (strain SC5314 / ATCC MYA-2876) GN=I503_00814 PE=3 SV=1; Elongation factor 1-alpha OS=Candida albicans (strain SC5314 / ATCC MYA-2876) GN=W5Q_02251 PE=3 SV=1; Elongation factor 1-alpha OS=Candida albicans P78042 GN=MGS_00808 PE=3 SV=1; Elongation factor 1-alpha OS=Can…			0	99	SVEMHHEQLAEGVPGDNVGFNVK	Oxidation(M)@4; Amidated@C-term		-0.00353734	2507.18	627.803	2507.19	627.804	4	14	1.1.1.1802.15	1	18.143	1582.21	18.0733
1	93.17	93.17	63.97	63.97	63.97	tr|C4YDJ3|C4YDJ3_CANAW; tr|A0A0A6Q741|A0A0A6Q741_CANAL; tr|A0A0A6M7H0|A0A0A6M7H0_CANAL; tr|A0A0A6M386|A0A0A6M386_CANAX; tr|A0A0A6LGT0|A0A0A6LGT0_CANAX; tr|A0A0A6L5Y0|A0A0A6L5Y0_CANAX; tr|A0A0A6L1C0|A0A0A6L1C0_CANAX; tr|A0A0A6KWM0|A0A0A6KWM0_CANAX; tr|A0A0A6K9D4|A0A0A6K9D4_CANAX; tr|A0A0A6K455|A0A0A6K455_CANAX; tr|A0A0A6JWU4|A0A0A6JWU4_CANAX; tr|A0A0A6J9A0|A0A0A6J9A0_CANAX; tr|A0A0A6J199|A0A0A6J19…	Elongation factor 1-alpha OS=Candida albicans (strain WO-1) GN=CAWG_00588 PE=3 SV=1; Elongation factor 1-alpha OS=Candida albicans (strain SC5314 / ATCC MYA-2876) GN=I503_00814 PE=3 SV=1; Elongation factor 1-alpha OS=Candida albicans (strain SC5314 / ATCC MYA-2876) GN=W5Q_02251 PE=3 SV=1; Elongation factor 1-alpha OS=Candida albicans P78042 GN=MGS_00808 PE=3 SV=1; Elongation factor 1-alpha OS=Can…			0	99	SVEMHHEQLAEGVPGDNVGFNVK	Oxidation(M)@4; Cation:K(E)@11		-0.0129116	2546.11	637.536	2546.13	637.539	4	14	1.1.1.1819.13	1	18.821	1447.78	18.7959
1	93.17	93.17	63.97	63.97	63.97	tr|C4YDJ3|C4YDJ3_CANAW; tr|A0A0A6Q741|A0A0A6Q741_CANAL; tr|A0A0A6M7H0|A0A0A6M7H0_CANAL; tr|A0A0A6M386|A0A0A6M386_CANAX; tr|A0A0A6LGT0|A0A0A6LGT0_CANAX; tr|A0A0A6L5Y0|A0A0A6L5Y0_CANAX; tr|A0A0A6L1C0|A0A0A6L1C0_CANAX; tr|A0A0A6KWM0|A0A0A6KWM0_CANAX; tr|A0A0A6K9D4|A0A0A6K9D4_CANAX; tr|A0A0A6K455|A0A0A6K455_CANAX; tr|A0A0A6JWU4|A0A0A6JWU4_CANAX; tr|A0A0A6J9A0|A0A0A6J9A0_CANAX; tr|A0A0A6J199|A0A0A6J19…	Elongation factor 1-alpha OS=Candida albicans (strain WO-1) GN=CAWG_00588 PE=3 SV=1; Elongation factor 1-alpha OS=Candida albicans (strain SC5314 / ATCC MYA-2876) GN=I503_00814 PE=3 SV=1; Elongation factor 1-alpha OS=Candida albicans (strain SC5314 / ATCC MYA-2876) GN=W5Q_02251 PE=3 SV=1; Elongation factor 1-alpha OS=Candida albicans P78042 GN=MGS_00808 PE=3 SV=1; Elongation factor 1-alpha OS=Can…			0	99	SVEMHHEQLAEGVPGDNVGFNVK	Oxidation(M)@4; Deamidated(Q)@8		-0.00433969	2509.15	628.295	2509.15	628.296	4	12	1.1.1.1849.9	1	20.012	12316.6	19.5922
1	93.17	93.17	63.97	63.97	63.97	tr|C4YDJ3|C4YDJ3_CANAW; tr|A0A0A6Q741|A0A0A6Q741_CANAL; tr|A0A0A6M7H0|A0A0A6M7H0_CANAL; tr|A0A0A6M386|A0A0A6M386_CANAX; tr|A0A0A6LGT0|A0A0A6LGT0_CANAX; tr|A0A0A6L5Y0|A0A0A6L5Y0_CANAX; tr|A0A0A6L1C0|A0A0A6L1C0_CANAX; tr|A0A0A6KWM0|A0A0A6KWM0_CANAX; tr|A0A0A6K9D4|A0A0A6K9D4_CANAX; tr|A0A0A6K455|A0A0A6K455_CANAX; tr|A0A0A6JWU4|A0A0A6JWU4_CANAX; tr|A0A0A6J9A0|A0A0A6J9A0_CANAX; tr|A0A0A6J199|A0A0A6J19…	Elongation factor 1-alpha OS=Candida albicans (strain WO-1) GN=CAWG_00588 PE=3 SV=1; Elongation factor 1-alpha OS=Candida albicans (strain SC5314 / ATCC MYA-2876) GN=I503_00814 PE=3 SV=1; Elongation factor 1-alpha OS=Candida albicans (strain SC5314 / ATCC MYA-2876) GN=W5Q_02251 PE=3 SV=1; Elongation factor 1-alpha OS=Candida albicans P78042 GN=MGS_00808 PE=3 SV=1; Elongation factor 1-alpha OS=Can…			0	98.37	SVEMHHEQLAEGVPGDNVGFNVK	Oxidation(M)@4; Cation:K(E)@11		-0.00613487	2546.12	849.714	2546.13	849.716	3	12	1.1.1.1816.18	1	18.7109	1026.21	18.7565
1	93.17	93.17	63.97	63.97	63.97	tr|C4YDJ3|C4YDJ3_CANAW; tr|A0A0A6Q741|A0A0A6Q741_CANAL; tr|A0A0A6M7H0|A0A0A6M7H0_CANAL; tr|A0A0A6M386|A0A0A6M386_CANAX; tr|A0A0A6LGT0|A0A0A6LGT0_CANAX; tr|A0A0A6L5Y0|A0A0A6L5Y0_CANAX; tr|A0A0A6L1C0|A0A0A6L1C0_CANAX; tr|A0A0A6KWM0|A0A0A6KWM0_CANAX; tr|A0A0A6K9D4|A0A0A6K9D4_CANAX; tr|A0A0A6K455|A0A0A6K455_CANAX; tr|A0A0A6JWU4|A0A0A6JWU4_CANAX; tr|A0A0A6J9A0|A0A0A6J9A0_CANAX; tr|A0A0A6J199|A0A0A6J19…	Elongation factor 1-alpha OS=Candida albicans (strain WO-1) GN=CAWG_00588 PE=3 SV=1; Elongation factor 1-alpha OS=Candida albicans (strain SC5314 / ATCC MYA-2876) GN=I503_00814 PE=3 SV=1; Elongation factor 1-alpha OS=Candida albicans (strain SC5314 / ATCC MYA-2876) GN=W5Q_02251 PE=3 SV=1; Elongation factor 1-alpha OS=Candida albicans P78042 GN=MGS_00808 PE=3 SV=1; Elongation factor 1-alpha OS=Can…			0	99	SVEMHHEQLAEGVPGDNVGFNVKNVSVKEIR	Oxidation(M)@4; Trimethyl(K)@28	missed K-N@23; missed K-E@28	-0.0145875	3475.74	580.297	3475.75	580.299	6	21	1.1.1.1864.9	1	20.6141	96739.4	20.9149
1	93.17	93.17	63.97	63.97	63.97	tr|C4YDJ3|C4YDJ3_CANAW; tr|A0A0A6Q741|A0A0A6Q741_CANAL; tr|A0A0A6M7H0|A0A0A6M7H0_CANAL; tr|A0A0A6M386|A0A0A6M386_CANAX; tr|A0A0A6LGT0|A0A0A6LGT0_CANAX; tr|A0A0A6L5Y0|A0A0A6L5Y0_CANAX; tr|A0A0A6L1C0|A0A0A6L1C0_CANAX; tr|A0A0A6KWM0|A0A0A6KWM0_CANAX; tr|A0A0A6K9D4|A0A0A6K9D4_CANAX; tr|A0A0A6K455|A0A0A6K455_CANAX; tr|A0A0A6JWU4|A0A0A6JWU4_CANAX; tr|A0A0A6J9A0|A0A0A6J9A0_CANAX; tr|A0A0A6J199|A0A0A6J19…	Elongation factor 1-alpha OS=Candida albicans (strain WO-1) GN=CAWG_00588 PE=3 SV=1; Elongation factor 1-alpha OS=Candida albicans (strain SC5314 / ATCC MYA-2876) GN=I503_00814 PE=3 SV=1; Elongation factor 1-alpha OS=Candida albicans (strain SC5314 / ATCC MYA-2876) GN=W5Q_02251 PE=3 SV=1; Elongation factor 1-alpha OS=Candida albicans P78042 GN=MGS_00808 PE=3 SV=1; Elongation factor 1-alpha OS=Can…			0	99	SVEMHHEQLAEGVPGDNVGFNVKNVSVKEIR	Oxidation(M)@4; Trimethyl(K)@28	missed K-N@23; missed K-E@28	-0.00588432	3475.75	869.944	3475.75	869.945	4	19	1.1.1.1864.19	1	20.6308	29859.2	20.9149
1	93.17	93.17	63.97	63.97	63.97	tr|C4YDJ3|C4YDJ3_CANAW; tr|A0A0A6Q741|A0A0A6Q741_CANAL; tr|A0A0A6M7H0|A0A0A6M7H0_CANAL; tr|A0A0A6M386|A0A0A6M386_CANAX; tr|A0A0A6LGT0|A0A0A6LGT0_CANAX; tr|A0A0A6L5Y0|A0A0A6L5Y0_CANAX; tr|A0A0A6L1C0|A0A0A6L1C0_CANAX; tr|A0A0A6KWM0|A0A0A6KWM0_CANAX; tr|A0A0A6K9D4|A0A0A6K9D4_CANAX; tr|A0A0A6K455|A0A0A6K455_CANAX; tr|A0A0A6JWU4|A0A0A6JWU4_CANAX; tr|A0A0A6J9A0|A0A0A6J9A0_CANAX; tr|A0A0A6J199|A0A0A6J19…	Elongation factor 1-alpha OS=Candida albicans (strain WO-1) GN=CAWG_00588 PE=3 SV=1; Elongation factor 1-alpha OS=Candida albicans (strain SC5314 / ATCC MYA-2876) GN=I503_00814 PE=3 SV=1; Elongation factor 1-alpha OS=Candida albicans (strain SC5314 / ATCC MYA-2876) GN=W5Q_02251 PE=3 SV=1; Elongation factor 1-alpha OS=Candida albicans P78042 GN=MGS_00808 PE=3 SV=1; Elongation factor 1-alpha OS=Can…			0	99	SVEMHHEQLAEGVPGDNVGFNVKNVSVKEIR	Oxidation(M)@4; Trimethyl(K)@28	missed K-N@23; missed K-E@28	-0.0138551	3475.74	580.297	3475.75	580.299	6	24	1.1.1.1866.9	1	20.6947	98073.9	20.9544
1	93.17	93.17	63.97	63.97	63.97	tr|C4YDJ3|C4YDJ3_CANAW; tr|A0A0A6Q741|A0A0A6Q741_CANAL; tr|A0A0A6M7H0|A0A0A6M7H0_CANAL; tr|A0A0A6M386|A0A0A6M386_CANAX; tr|A0A0A6LGT0|A0A0A6LGT0_CANAX; tr|A0A0A6L5Y0|A0A0A6L5Y0_CANAX; tr|A0A0A6L1C0|A0A0A6L1C0_CANAX; tr|A0A0A6KWM0|A0A0A6KWM0_CANAX; tr|A0A0A6K9D4|A0A0A6K9D4_CANAX; tr|A0A0A6K455|A0A0A6K455_CANAX; tr|A0A0A6JWU4|A0A0A6JWU4_CANAX; tr|A0A0A6J9A0|A0A0A6J9A0_CANAX; tr|A0A0A6J199|A0A0A6J19…	Elongation factor 1-alpha OS=Candida albicans (strain WO-1) GN=CAWG_00588 PE=3 SV=1; Elongation factor 1-alpha OS=Candida albicans (strain SC5314 / ATCC MYA-2876) GN=I503_00814 PE=3 SV=1; Elongation factor 1-alpha OS=Candida albicans (strain SC5314 / ATCC MYA-2876) GN=W5Q_02251 PE=3 SV=1; Elongation factor 1-alpha OS=Candida albicans P78042 GN=MGS_00808 PE=3 SV=1; Elongation factor 1-alpha OS=Can…			0	99	SVEMHHEQLAEGVPGDNVGFNVKNVSVKEIR	Oxidation(M)@4; Trimethyl(K)@28	missed K-N@23; missed K-E@28	-0.00742479	3475.74	696.156	3475.75	696.158	5	28	1.1.1.1867.15	1	20.7447	109837	20.9149
1	93.17	93.17	63.97	63.97	63.97	tr|C4YDJ3|C4YDJ3_CANAW; tr|A0A0A6Q741|A0A0A6Q741_CANAL; tr|A0A0A6M7H0|A0A0A6M7H0_CANAL; tr|A0A0A6M386|A0A0A6M386_CANAX; tr|A0A0A6LGT0|A0A0A6LGT0_CANAX; tr|A0A0A6L5Y0|A0A0A6L5Y0_CANAX; tr|A0A0A6L1C0|A0A0A6L1C0_CANAX; tr|A0A0A6KWM0|A0A0A6KWM0_CANAX; tr|A0A0A6K9D4|A0A0A6K9D4_CANAX; tr|A0A0A6K455|A0A0A6K455_CANAX; tr|A0A0A6JWU4|A0A0A6JWU4_CANAX; tr|A0A0A6J9A0|A0A0A6J9A0_CANAX; tr|A0A0A6J199|A0A0A6J19…	Elongation factor 1-alpha OS=Candida albicans (strain WO-1) GN=CAWG_00588 PE=3 SV=1; Elongation factor 1-alpha OS=Candida albicans (strain SC5314 / ATCC MYA-2876) GN=I503_00814 PE=3 SV=1; Elongation factor 1-alpha OS=Candida albicans (strain SC5314 / ATCC MYA-2876) GN=W5Q_02251 PE=3 SV=1; Elongation factor 1-alpha OS=Candida albicans P78042 GN=MGS_00808 PE=3 SV=1; Elongation factor 1-alpha OS=Can…			0	99	SVEMHHEQLAEGVPGDNVGFNVKNVSVKEIR	Oxidation(M)@4; Trimethyl(K)@23	missed K-N@23; missed K-E@28	-0.00304381	3475.75	1159.59	3475.75	1159.59	3	25	1.1.1.1868.19	1	20.7913	5046.67	20.9149
1	93.17	93.17	63.97	63.97	63.97	tr|C4YDJ3|C4YDJ3_CANAW; tr|A0A0A6Q741|A0A0A6Q741_CANAL; tr|A0A0A6M7H0|A0A0A6M7H0_CANAL; tr|A0A0A6M386|A0A0A6M386_CANAX; tr|A0A0A6LGT0|A0A0A6LGT0_CANAX; tr|A0A0A6L5Y0|A0A0A6L5Y0_CANAX; tr|A0A0A6L1C0|A0A0A6L1C0_CANAX; tr|A0A0A6KWM0|A0A0A6KWM0_CANAX; tr|A0A0A6K9D4|A0A0A6K9D4_CANAX; tr|A0A0A6K455|A0A0A6K455_CANAX; tr|A0A0A6JWU4|A0A0A6JWU4_CANAX; tr|A0A0A6J9A0|A0A0A6J9A0_CANAX; tr|A0A0A6J199|A0A0A6J19…	Elongation factor 1-alpha OS=Candida albicans (strain WO-1) GN=CAWG_00588 PE=3 SV=1; Elongation factor 1-alpha OS=Candida albicans (strain SC5314 / ATCC MYA-2876) GN=I503_00814 PE=3 SV=1; Elongation factor 1-alpha OS=Candida albicans (strain SC5314 / ATCC MYA-2876) GN=W5Q_02251 PE=3 SV=1; Elongation factor 1-alpha OS=Candida albicans P78042 GN=MGS_00808 PE=3 SV=1; Elongation factor 1-alpha OS=Can…			0	99	SVEMHHEQLAEGVPGDNVGFNVKNVSVKEIR	Oxidation(M)@4; Trimethyl(K)@28	missed K-N@23; missed K-E@28	-0.0138551	3475.74	580.297	3475.75	580.299	6	26	1.1.1.1869.7	1	20.8112	98073.9	20.9544
1	93.17	93.17	63.97	63.97	63.97	tr|C4YDJ3|C4YDJ3_CANAW; tr|A0A0A6Q741|A0A0A6Q741_CANAL; tr|A0A0A6M7H0|A0A0A6M7H0_CANAL; tr|A0A0A6M386|A0A0A6M386_CANAX; tr|A0A0A6LGT0|A0A0A6LGT0_CANAX; tr|A0A0A6L5Y0|A0A0A6L5Y0_CANAX; tr|A0A0A6L1C0|A0A0A6L1C0_CANAX; tr|A0A0A6KWM0|A0A0A6KWM0_CANAX; tr|A0A0A6K9D4|A0A0A6K9D4_CANAX; tr|A0A0A6K455|A0A0A6K455_CANAX; tr|A0A0A6JWU4|A0A0A6JWU4_CANAX; tr|A0A0A6J9A0|A0A0A6J9A0_CANAX; tr|A0A0A6J199|A0A0A6J19…	Elongation factor 1-alpha OS=Candida albicans (strain WO-1) GN=CAWG_00588 PE=3 SV=1; Elongation factor 1-alpha OS=Candida albicans (strain SC5314 / ATCC MYA-2876) GN=I503_00814 PE=3 SV=1; Elongation factor 1-alpha OS=Candida albicans (strain SC5314 / ATCC MYA-2876) GN=W5Q_02251 PE=3 SV=1; Elongation factor 1-alpha OS=Candida albicans P78042 GN=MGS_00808 PE=3 SV=1; Elongation factor 1-alpha OS=Can…			0	99	SVEMHHEQLAEGVPGDNVGFNVKNVSVKEIR	Oxidation(M)@4; Trimethyl(K)@28	missed K-N@23; missed K-E@28	-0.00304381	3475.75	1159.59	3475.75	1159.59	3	23	1.1.1.1869.19	1	20.8312	5046.67	20.9149
1	93.17	93.17	63.97	63.97	63.97	tr|C4YDJ3|C4YDJ3_CANAW; tr|A0A0A6Q741|A0A0A6Q741_CANAL; tr|A0A0A6M7H0|A0A0A6M7H0_CANAL; tr|A0A0A6M386|A0A0A6M386_CANAX; tr|A0A0A6LGT0|A0A0A6LGT0_CANAX; tr|A0A0A6L5Y0|A0A0A6L5Y0_CANAX; tr|A0A0A6L1C0|A0A0A6L1C0_CANAX; tr|A0A0A6KWM0|A0A0A6KWM0_CANAX; tr|A0A0A6K9D4|A0A0A6K9D4_CANAX; tr|A0A0A6K455|A0A0A6K455_CANAX; tr|A0A0A6JWU4|A0A0A6JWU4_CANAX; tr|A0A0A6J9A0|A0A0A6J9A0_CANAX; tr|A0A0A6J199|A0A0A6J19…	Elongation factor 1-alpha OS=Candida albicans (strain WO-1) GN=CAWG_00588 PE=3 SV=1; Elongation factor 1-alpha OS=Candida albicans (strain SC5314 / ATCC MYA-2876) GN=I503_00814 PE=3 SV=1; Elongation factor 1-alpha OS=Candida albicans (strain SC5314 / ATCC MYA-2876) GN=W5Q_02251 PE=3 SV=1; Elongation factor 1-alpha OS=Candida albicans P78042 GN=MGS_00808 PE=3 SV=1; Elongation factor 1-alpha OS=Can…			0	99	SVEMHHEQLAEGVPGDNVGFNVKNVSVKEIR	Oxidation(M)@4; Trimethyl(K)@28	missed K-N@23; missed K-E@28	-0.0138551	3475.74	580.297	3475.75	580.299	6	26	1.1.1.1872.5	1	20.9267	98073.9	20.9544
1	93.17	93.17	63.97	63.97	63.97	tr|C4YDJ3|C4YDJ3_CANAW; tr|A0A0A6Q741|A0A0A6Q741_CANAL; tr|A0A0A6M7H0|A0A0A6M7H0_CANAL; tr|A0A0A6M386|A0A0A6M386_CANAX; tr|A0A0A6LGT0|A0A0A6LGT0_CANAX; tr|A0A0A6L5Y0|A0A0A6L5Y0_CANAX; tr|A0A0A6L1C0|A0A0A6L1C0_CANAX; tr|A0A0A6KWM0|A0A0A6KWM0_CANAX; tr|A0A0A6K9D4|A0A0A6K9D4_CANAX; tr|A0A0A6K455|A0A0A6K455_CANAX; tr|A0A0A6JWU4|A0A0A6JWU4_CANAX; tr|A0A0A6J9A0|A0A0A6J9A0_CANAX; tr|A0A0A6J199|A0A0A6J19…	Elongation factor 1-alpha OS=Candida albicans (strain WO-1) GN=CAWG_00588 PE=3 SV=1; Elongation factor 1-alpha OS=Candida albicans (strain SC5314 / ATCC MYA-2876) GN=I503_00814 PE=3 SV=1; Elongation factor 1-alpha OS=Candida albicans (strain SC5314 / ATCC MYA-2876) GN=W5Q_02251 PE=3 SV=1; Elongation factor 1-alpha OS=Candida albicans P78042 GN=MGS_00808 PE=3 SV=1; Elongation factor 1-alpha OS=Can…			0	99	SVEMHHEQLAEGVPGDNVGFNVKNVSVKEIR	Oxidation(M)@4; Trimethyl(K)@28	missed K-N@23; missed K-E@28	-0.00304381	3475.75	1159.59	3475.75	1159.59	3	27	1.1.1.1873.19	1	20.9894	5046.67	20.9149
1	93.17	93.17	63.97	63.97	63.97	tr|C4YDJ3|C4YDJ3_CANAW; tr|A0A0A6Q741|A0A0A6Q741_CANAL; tr|A0A0A6M7H0|A0A0A6M7H0_CANAL; tr|A0A0A6M386|A0A0A6M386_CANAX; tr|A0A0A6LGT0|A0A0A6LGT0_CANAX; tr|A0A0A6L5Y0|A0A0A6L5Y0_CANAX; tr|A0A0A6L1C0|A0A0A6L1C0_CANAX; tr|A0A0A6KWM0|A0A0A6KWM0_CANAX; tr|A0A0A6K9D4|A0A0A6K9D4_CANAX; tr|A0A0A6K455|A0A0A6K455_CANAX; tr|A0A0A6JWU4|A0A0A6JWU4_CANAX; tr|A0A0A6J9A0|A0A0A6J9A0_CANAX; tr|A0A0A6J199|A0A0A6J19…	Elongation factor 1-alpha OS=Candida albicans (strain WO-1) GN=CAWG_00588 PE=3 SV=1; Elongation factor 1-alpha OS=Candida albicans (strain SC5314 / ATCC MYA-2876) GN=I503_00814 PE=3 SV=1; Elongation factor 1-alpha OS=Candida albicans (strain SC5314 / ATCC MYA-2876) GN=W5Q_02251 PE=3 SV=1; Elongation factor 1-alpha OS=Candida albicans P78042 GN=MGS_00808 PE=3 SV=1; Elongation factor 1-alpha OS=Can…			0	99	SVEMHHEQLAEGVPGDNVGFNVKNVSVKEIR	Oxidation(M)@4; Trimethyl(K)@28	missed K-N@23; missed K-E@28	-0.00304381	3475.75	1159.59	3475.75	1159.59	3	24	1.1.1.1874.19	1	21.0287	5046.67	20.9149
1	93.17	93.17	63.97	63.97	63.97	tr|C4YDJ3|C4YDJ3_CANAW; tr|A0A0A6Q741|A0A0A6Q741_CANAL; tr|A0A0A6M7H0|A0A0A6M7H0_CANAL; tr|A0A0A6M386|A0A0A6M386_CANAX; tr|A0A0A6LGT0|A0A0A6LGT0_CANAX; tr|A0A0A6L5Y0|A0A0A6L5Y0_CANAX; tr|A0A0A6L1C0|A0A0A6L1C0_CANAX; tr|A0A0A6KWM0|A0A0A6KWM0_CANAX; tr|A0A0A6K9D4|A0A0A6K9D4_CANAX; tr|A0A0A6K455|A0A0A6K455_CANAX; tr|A0A0A6JWU4|A0A0A6JWU4_CANAX; tr|A0A0A6J9A0|A0A0A6J9A0_CANAX; tr|A0A0A6J199|A0A0A6J19…	Elongation factor 1-alpha OS=Candida albicans (strain WO-1) GN=CAWG_00588 PE=3 SV=1; Elongation factor 1-alpha OS=Candida albicans (strain SC5314 / ATCC MYA-2876) GN=I503_00814 PE=3 SV=1; Elongation factor 1-alpha OS=Candida albicans (strain SC5314 / ATCC MYA-2876) GN=W5Q_02251 PE=3 SV=1; Elongation factor 1-alpha OS=Candida albicans P78042 GN=MGS_00808 PE=3 SV=1; Elongation factor 1-alpha OS=Can…			0	99	SVEMHHEQLAEGVPGDNVGFNVKNVSVKEIR	Oxidation(M)@4; Trimethyl(K)@28	missed K-N@23; missed K-E@28	-0.0138551	3475.74	580.297	3475.75	580.299	6	24	1.1.1.1875.7	1	21.048	98073.9	20.9544
1	93.17	93.17	63.97	63.97	63.97	tr|C4YDJ3|C4YDJ3_CANAW; tr|A0A0A6Q741|A0A0A6Q741_CANAL; tr|A0A0A6M7H0|A0A0A6M7H0_CANAL; tr|A0A0A6M386|A0A0A6M386_CANAX; tr|A0A0A6LGT0|A0A0A6LGT0_CANAX; tr|A0A0A6L5Y0|A0A0A6L5Y0_CANAX; tr|A0A0A6L1C0|A0A0A6L1C0_CANAX; tr|A0A0A6KWM0|A0A0A6KWM0_CANAX; tr|A0A0A6K9D4|A0A0A6K9D4_CANAX; tr|A0A0A6K455|A0A0A6K455_CANAX; tr|A0A0A6JWU4|A0A0A6JWU4_CANAX; tr|A0A0A6J9A0|A0A0A6J9A0_CANAX; tr|A0A0A6J199|A0A0A6J19…	Elongation factor 1-alpha OS=Candida albicans (strain WO-1) GN=CAWG_00588 PE=3 SV=1; Elongation factor 1-alpha OS=Candida albicans (strain SC5314 / ATCC MYA-2876) GN=I503_00814 PE=3 SV=1; Elongation factor 1-alpha OS=Candida albicans (strain SC5314 / ATCC MYA-2876) GN=W5Q_02251 PE=3 SV=1; Elongation factor 1-alpha OS=Candida albicans P78042 GN=MGS_00808 PE=3 SV=1; Elongation factor 1-alpha OS=Can…			0	99	SVEMHHEQLAEGVPGDNVGFNVKNVSVKEIR	Oxidation(M)@4; Trimethyl(K)@28	missed K-N@23; missed K-E@28	-0.00742479	3475.74	696.156	3475.75	696.158	5	29	1.1.1.1875.15	1	21.0613	109837	20.9149
1	93.17	93.17	63.97	63.97	63.97	tr|C4YDJ3|C4YDJ3_CANAW; tr|A0A0A6Q741|A0A0A6Q741_CANAL; tr|A0A0A6M7H0|A0A0A6M7H0_CANAL; tr|A0A0A6M386|A0A0A6M386_CANAX; tr|A0A0A6LGT0|A0A0A6LGT0_CANAX; tr|A0A0A6L5Y0|A0A0A6L5Y0_CANAX; tr|A0A0A6L1C0|A0A0A6L1C0_CANAX; tr|A0A0A6KWM0|A0A0A6KWM0_CANAX; tr|A0A0A6K9D4|A0A0A6K9D4_CANAX; tr|A0A0A6K455|A0A0A6K455_CANAX; tr|A0A0A6JWU4|A0A0A6JWU4_CANAX; tr|A0A0A6J9A0|A0A0A6J9A0_CANAX; tr|A0A0A6J199|A0A0A6J19…	Elongation factor 1-alpha OS=Candida albicans (strain WO-1) GN=CAWG_00588 PE=3 SV=1; Elongation factor 1-alpha OS=Candida albicans (strain SC5314 / ATCC MYA-2876) GN=I503_00814 PE=3 SV=1; Elongation factor 1-alpha OS=Candida albicans (strain SC5314 / ATCC MYA-2876) GN=W5Q_02251 PE=3 SV=1; Elongation factor 1-alpha OS=Candida albicans P78042 GN=MGS_00808 PE=3 SV=1; Elongation factor 1-alpha OS=Can…			0	99	SVEMHHEQLAEGVPGDNVGFNVKNVSVKEIR	Oxidation(M)@4; Trimethyl(K)@28	missed K-N@23; missed K-E@28	-0.00304381	3475.75	1159.59	3475.75	1159.59	3	28	1.1.1.1877.19	1	21.1464	5046.67	20.9149
1	93.17	93.17	63.97	63.97	63.97	tr|C4YDJ3|C4YDJ3_CANAW; tr|A0A0A6Q741|A0A0A6Q741_CANAL; tr|A0A0A6M7H0|A0A0A6M7H0_CANAL; tr|A0A0A6M386|A0A0A6M386_CANAX; tr|A0A0A6LGT0|A0A0A6LGT0_CANAX; tr|A0A0A6L5Y0|A0A0A6L5Y0_CANAX; tr|A0A0A6L1C0|A0A0A6L1C0_CANAX; tr|A0A0A6KWM0|A0A0A6KWM0_CANAX; tr|A0A0A6K9D4|A0A0A6K9D4_CANAX; tr|A0A0A6K455|A0A0A6K455_CANAX; tr|A0A0A6JWU4|A0A0A6JWU4_CANAX; tr|A0A0A6J9A0|A0A0A6J9A0_CANAX; tr|A0A0A6J199|A0A0A6J19…	Elongation factor 1-alpha OS=Candida albicans (strain WO-1) GN=CAWG_00588 PE=3 SV=1; Elongation factor 1-alpha OS=Candida albicans (strain SC5314 / ATCC MYA-2876) GN=I503_00814 PE=3 SV=1; Elongation factor 1-alpha OS=Candida albicans (strain SC5314 / ATCC MYA-2876) GN=W5Q_02251 PE=3 SV=1; Elongation factor 1-alpha OS=Candida albicans P78042 GN=MGS_00808 PE=3 SV=1; Elongation factor 1-alpha OS=Can…			0	99	SVEMHHEQLAEGVPGDNVGFNVKNVSVKEIR	Oxidation(M)@4; Trimethyl(K)@28	missed K-N@23; missed K-E@28	-0.0138551	3475.74	580.297	3475.75	580.299	6	26	1.1.1.1878.9	1	21.169	98073.9	20.9544
1	93.17	93.17	63.97	63.97	63.97	tr|C4YDJ3|C4YDJ3_CANAW; tr|A0A0A6Q741|A0A0A6Q741_CANAL; tr|A0A0A6M7H0|A0A0A6M7H0_CANAL; tr|A0A0A6M386|A0A0A6M386_CANAX; tr|A0A0A6LGT0|A0A0A6LGT0_CANAX; tr|A0A0A6L5Y0|A0A0A6L5Y0_CANAX; tr|A0A0A6L1C0|A0A0A6L1C0_CANAX; tr|A0A0A6KWM0|A0A0A6KWM0_CANAX; tr|A0A0A6K9D4|A0A0A6K9D4_CANAX; tr|A0A0A6K455|A0A0A6K455_CANAX; tr|A0A0A6JWU4|A0A0A6JWU4_CANAX; tr|A0A0A6J9A0|A0A0A6J9A0_CANAX; tr|A0A0A6J199|A0A0A6J19…	Elongation factor 1-alpha OS=Candida albicans (strain WO-1) GN=CAWG_00588 PE=3 SV=1; Elongation factor 1-alpha OS=Candida albicans (strain SC5314 / ATCC MYA-2876) GN=I503_00814 PE=3 SV=1; Elongation factor 1-alpha OS=Candida albicans (strain SC5314 / ATCC MYA-2876) GN=W5Q_02251 PE=3 SV=1; Elongation factor 1-alpha OS=Candida albicans P78042 GN=MGS_00808 PE=3 SV=1; Elongation factor 1-alpha OS=Can…			0	99	SVEMHHEQLAEGVPGDNVGFNVKNVSVKEIR	Oxidation(M)@4; Trimethyl(K)@23	missed K-N@23; missed K-E@28	-0.00742479	3475.74	696.156	3475.75	696.158	5	29	1.1.1.1878.18	1	21.184	109837	20.9149
1	93.17	93.17	63.97	63.97	63.97	tr|C4YDJ3|C4YDJ3_CANAW; tr|A0A0A6Q741|A0A0A6Q741_CANAL; tr|A0A0A6M7H0|A0A0A6M7H0_CANAL; tr|A0A0A6M386|A0A0A6M386_CANAX; tr|A0A0A6LGT0|A0A0A6LGT0_CANAX; tr|A0A0A6L5Y0|A0A0A6L5Y0_CANAX; tr|A0A0A6L1C0|A0A0A6L1C0_CANAX; tr|A0A0A6KWM0|A0A0A6KWM0_CANAX; tr|A0A0A6K9D4|A0A0A6K9D4_CANAX; tr|A0A0A6K455|A0A0A6K455_CANAX; tr|A0A0A6JWU4|A0A0A6JWU4_CANAX; tr|A0A0A6J9A0|A0A0A6J9A0_CANAX; tr|A0A0A6J199|A0A0A6J19…	Elongation factor 1-alpha OS=Candida albicans (strain WO-1) GN=CAWG_00588 PE=3 SV=1; Elongation factor 1-alpha OS=Candida albicans (strain SC5314 / ATCC MYA-2876) GN=I503_00814 PE=3 SV=1; Elongation factor 1-alpha OS=Candida albicans (strain SC5314 / ATCC MYA-2876) GN=W5Q_02251 PE=3 SV=1; Elongation factor 1-alpha OS=Candida albicans P78042 GN=MGS_00808 PE=3 SV=1; Elongation factor 1-alpha OS=Can…			0	99	SVEMHHEQLAEGVPGDNVGFNVKNVSVKEIR	Oxidation(M)@4; Trimethyl(K)@28	missed K-N@23; missed K-E@28	-0.00304381	3475.75	1159.59	3475.75	1159.59	3	22	1.1.1.1879.19	1	21.2251	5046.67	20.9149
1	93.17	93.17	63.97	63.97	63.97	tr|C4YDJ3|C4YDJ3_CANAW; tr|A0A0A6Q741|A0A0A6Q741_CANAL; tr|A0A0A6M7H0|A0A0A6M7H0_CANAL; tr|A0A0A6M386|A0A0A6M386_CANAX; tr|A0A0A6LGT0|A0A0A6LGT0_CANAX; tr|A0A0A6L5Y0|A0A0A6L5Y0_CANAX; tr|A0A0A6L1C0|A0A0A6L1C0_CANAX; tr|A0A0A6KWM0|A0A0A6KWM0_CANAX; tr|A0A0A6K9D4|A0A0A6K9D4_CANAX; tr|A0A0A6K455|A0A0A6K455_CANAX; tr|A0A0A6JWU4|A0A0A6JWU4_CANAX; tr|A0A0A6J9A0|A0A0A6J9A0_CANAX; tr|A0A0A6J199|A0A0A6J19…	Elongation factor 1-alpha OS=Candida albicans (strain WO-1) GN=CAWG_00588 PE=3 SV=1; Elongation factor 1-alpha OS=Candida albicans (strain SC5314 / ATCC MYA-2876) GN=I503_00814 PE=3 SV=1; Elongation factor 1-alpha OS=Candida albicans (strain SC5314 / ATCC MYA-2876) GN=W5Q_02251 PE=3 SV=1; Elongation factor 1-alpha OS=Candida albicans P78042 GN=MGS_00808 PE=3 SV=1; Elongation factor 1-alpha OS=Can…			0	99	SVEMHHEQLAEGVPGDNVGFNVKNVSVKEIR	Oxidation(M)@4; Trimethyl(K)@28	missed K-N@23; missed K-E@28	-0.0138551	3475.74	580.297	3475.75	580.299	6	25	1.1.1.1881.14	1	21.2959	98073.9	20.9544
1	93.17	93.17	63.97	63.97	63.97	tr|C4YDJ3|C4YDJ3_CANAW; tr|A0A0A6Q741|A0A0A6Q741_CANAL; tr|A0A0A6M7H0|A0A0A6M7H0_CANAL; tr|A0A0A6M386|A0A0A6M386_CANAX; tr|A0A0A6LGT0|A0A0A6LGT0_CANAX; tr|A0A0A6L5Y0|A0A0A6L5Y0_CANAX; tr|A0A0A6L1C0|A0A0A6L1C0_CANAX; tr|A0A0A6KWM0|A0A0A6KWM0_CANAX; tr|A0A0A6K9D4|A0A0A6K9D4_CANAX; tr|A0A0A6K455|A0A0A6K455_CANAX; tr|A0A0A6JWU4|A0A0A6JWU4_CANAX; tr|A0A0A6J9A0|A0A0A6J9A0_CANAX; tr|A0A0A6J199|A0A0A6J19…	Elongation factor 1-alpha OS=Candida albicans (strain WO-1) GN=CAWG_00588 PE=3 SV=1; Elongation factor 1-alpha OS=Candida albicans (strain SC5314 / ATCC MYA-2876) GN=I503_00814 PE=3 SV=1; Elongation factor 1-alpha OS=Candida albicans (strain SC5314 / ATCC MYA-2876) GN=W5Q_02251 PE=3 SV=1; Elongation factor 1-alpha OS=Candida albicans P78042 GN=MGS_00808 PE=3 SV=1; Elongation factor 1-alpha OS=Can…			0	99	SVEMHHEQLAEGVPGDNVGFNVKNVSVKEIR	Oxidation(M)@4; Trimethyl(K)@28	missed K-N@23; missed K-E@28	-0.00742479	3475.74	696.156	3475.75	696.158	5	26	1.1.1.1881.18	1	21.3025	111334	20.9149
1	93.17	93.17	63.97	63.97	63.97	tr|C4YDJ3|C4YDJ3_CANAW; tr|A0A0A6Q741|A0A0A6Q741_CANAL; tr|A0A0A6M7H0|A0A0A6M7H0_CANAL; tr|A0A0A6M386|A0A0A6M386_CANAX; tr|A0A0A6LGT0|A0A0A6LGT0_CANAX; tr|A0A0A6L5Y0|A0A0A6L5Y0_CANAX; tr|A0A0A6L1C0|A0A0A6L1C0_CANAX; tr|A0A0A6KWM0|A0A0A6KWM0_CANAX; tr|A0A0A6K9D4|A0A0A6K9D4_CANAX; tr|A0A0A6K455|A0A0A6K455_CANAX; tr|A0A0A6JWU4|A0A0A6JWU4_CANAX; tr|A0A0A6J9A0|A0A0A6J9A0_CANAX; tr|A0A0A6J199|A0A0A6J19…	Elongation factor 1-alpha OS=Candida albicans (strain WO-1) GN=CAWG_00588 PE=3 SV=1; Elongation factor 1-alpha OS=Candida albicans (strain SC5314 / ATCC MYA-2876) GN=I503_00814 PE=3 SV=1; Elongation factor 1-alpha OS=Candida albicans (strain SC5314 / ATCC MYA-2876) GN=W5Q_02251 PE=3 SV=1; Elongation factor 1-alpha OS=Candida albicans P78042 GN=MGS_00808 PE=3 SV=1; Elongation factor 1-alpha OS=Can…			0	99	SVEMHHEQLAEGVPGDNVGFNVKNVSVKEIR	Oxidation(M)@4; Trimethyl(K)@28	missed K-N@23; missed K-E@28	-0.00588432	3475.75	869.944	3475.75	869.945	4	21	1.1.1.1882.18	1	21.3426	30403	20.9544
1	93.17	93.17	63.97	63.97	63.97	tr|C4YDJ3|C4YDJ3_CANAW; tr|A0A0A6Q741|A0A0A6Q741_CANAL; tr|A0A0A6M7H0|A0A0A6M7H0_CANAL; tr|A0A0A6M386|A0A0A6M386_CANAX; tr|A0A0A6LGT0|A0A0A6LGT0_CANAX; tr|A0A0A6L5Y0|A0A0A6L5Y0_CANAX; tr|A0A0A6L1C0|A0A0A6L1C0_CANAX; tr|A0A0A6KWM0|A0A0A6KWM0_CANAX; tr|A0A0A6K9D4|A0A0A6K9D4_CANAX; tr|A0A0A6K455|A0A0A6K455_CANAX; tr|A0A0A6JWU4|A0A0A6JWU4_CANAX; tr|A0A0A6J9A0|A0A0A6J9A0_CANAX; tr|A0A0A6J199|A0A0A6J19…	Elongation factor 1-alpha OS=Candida albicans (strain WO-1) GN=CAWG_00588 PE=3 SV=1; Elongation factor 1-alpha OS=Candida albicans (strain SC5314 / ATCC MYA-2876) GN=I503_00814 PE=3 SV=1; Elongation factor 1-alpha OS=Candida albicans (strain SC5314 / ATCC MYA-2876) GN=W5Q_02251 PE=3 SV=1; Elongation factor 1-alpha OS=Candida albicans P78042 GN=MGS_00808 PE=3 SV=1; Elongation factor 1-alpha OS=Can…			0	99	SVEMHHEQLAEGVPGDNVGFNVKNVSVKEIR	Oxidation(M)@4; Trimethyl(K)@28	missed K-N@23; missed K-E@28	-0.0138551	3475.74	580.297	3475.75	580.299	6	22	1.1.1.1884.12	1	21.4129	91288.4	20.9938
1	93.17	93.17	63.97	63.97	63.97	tr|C4YDJ3|C4YDJ3_CANAW; tr|A0A0A6Q741|A0A0A6Q741_CANAL; tr|A0A0A6M7H0|A0A0A6M7H0_CANAL; tr|A0A0A6M386|A0A0A6M386_CANAX; tr|A0A0A6LGT0|A0A0A6LGT0_CANAX; tr|A0A0A6L5Y0|A0A0A6L5Y0_CANAX; tr|A0A0A6L1C0|A0A0A6L1C0_CANAX; tr|A0A0A6KWM0|A0A0A6KWM0_CANAX; tr|A0A0A6K9D4|A0A0A6K9D4_CANAX; tr|A0A0A6K455|A0A0A6K455_CANAX; tr|A0A0A6JWU4|A0A0A6JWU4_CANAX; tr|A0A0A6J9A0|A0A0A6J9A0_CANAX; tr|A0A0A6J199|A0A0A6J19…	Elongation factor 1-alpha OS=Candida albicans (strain WO-1) GN=CAWG_00588 PE=3 SV=1; Elongation factor 1-alpha OS=Candida albicans (strain SC5314 / ATCC MYA-2876) GN=I503_00814 PE=3 SV=1; Elongation factor 1-alpha OS=Candida albicans (strain SC5314 / ATCC MYA-2876) GN=W5Q_02251 PE=3 SV=1; Elongation factor 1-alpha OS=Candida albicans P78042 GN=MGS_00808 PE=3 SV=1; Elongation factor 1-alpha OS=Can…			0	99	SVEMHHEQLAEGVPGDNVGFNVKNVSVKEIR	Oxidation(M)@4; Trimethyl(K)@28	missed K-N@23; missed K-E@28	-0.00742479	3475.74	696.156	3475.75	696.158	5	25	1.1.1.1884.17	1	21.4212	104767	20.9938
1	93.17	93.17	63.97	63.97	63.97	tr|C4YDJ3|C4YDJ3_CANAW; tr|A0A0A6Q741|A0A0A6Q741_CANAL; tr|A0A0A6M7H0|A0A0A6M7H0_CANAL; tr|A0A0A6M386|A0A0A6M386_CANAX; tr|A0A0A6LGT0|A0A0A6LGT0_CANAX; tr|A0A0A6L5Y0|A0A0A6L5Y0_CANAX; tr|A0A0A6L1C0|A0A0A6L1C0_CANAX; tr|A0A0A6KWM0|A0A0A6KWM0_CANAX; tr|A0A0A6K9D4|A0A0A6K9D4_CANAX; tr|A0A0A6K455|A0A0A6K455_CANAX; tr|A0A0A6JWU4|A0A0A6JWU4_CANAX; tr|A0A0A6J9A0|A0A0A6J9A0_CANAX; tr|A0A0A6J199|A0A0A6J19…	Elongation factor 1-alpha OS=Candida albicans (strain WO-1) GN=CAWG_00588 PE=3 SV=1; Elongation factor 1-alpha OS=Candida albicans (strain SC5314 / ATCC MYA-2876) GN=I503_00814 PE=3 SV=1; Elongation factor 1-alpha OS=Candida albicans (strain SC5314 / ATCC MYA-2876) GN=W5Q_02251 PE=3 SV=1; Elongation factor 1-alpha OS=Candida albicans P78042 GN=MGS_00808 PE=3 SV=1; Elongation factor 1-alpha OS=Can…			0	99	SVEMHHEQLAEGVPGDNVGFNVKNVSVKEIR	Oxidation(M)@4; Deamidated(Q)@8; Trimethyl(K)@28	missed K-N@23; missed K-E@28	-0.0105937	3476.73	580.462	3476.74	580.463	6	24	1.1.1.1887.10	1	21.5295	23034.3	21.6286
1	93.17	93.17	63.97	63.97	63.97	tr|C4YDJ3|C4YDJ3_CANAW; tr|A0A0A6Q741|A0A0A6Q741_CANAL; tr|A0A0A6M7H0|A0A0A6M7H0_CANAL; tr|A0A0A6M386|A0A0A6M386_CANAX; tr|A0A0A6LGT0|A0A0A6LGT0_CANAX; tr|A0A0A6L5Y0|A0A0A6L5Y0_CANAX; tr|A0A0A6L1C0|A0A0A6L1C0_CANAX; tr|A0A0A6KWM0|A0A0A6KWM0_CANAX; tr|A0A0A6K9D4|A0A0A6K9D4_CANAX; tr|A0A0A6K455|A0A0A6K455_CANAX; tr|A0A0A6JWU4|A0A0A6JWU4_CANAX; tr|A0A0A6J9A0|A0A0A6J9A0_CANAX; tr|A0A0A6J199|A0A0A6J19…	Elongation factor 1-alpha OS=Candida albicans (strain WO-1) GN=CAWG_00588 PE=3 SV=1; Elongation factor 1-alpha OS=Candida albicans (strain SC5314 / ATCC MYA-2876) GN=I503_00814 PE=3 SV=1; Elongation factor 1-alpha OS=Candida albicans (strain SC5314 / ATCC MYA-2876) GN=W5Q_02251 PE=3 SV=1; Elongation factor 1-alpha OS=Candida albicans P78042 GN=MGS_00808 PE=3 SV=1; Elongation factor 1-alpha OS=Can…			0	99	SVEMHHEQLAEGVPGDNVGFNVKNVSVKEIR	Oxidation(M)@4; Deamidated(Q)@8; Trimethyl(K)@28	missed K-N@23; missed K-E@28	-0.00392056	3476.73	696.354	3476.74	696.354	5	22	1.1.1.1887.15	1	21.5379	23615.6	21.5889
1	93.17	93.17	63.97	63.97	63.97	tr|C4YDJ3|C4YDJ3_CANAW; tr|A0A0A6Q741|A0A0A6Q741_CANAL; tr|A0A0A6M7H0|A0A0A6M7H0_CANAL; tr|A0A0A6M386|A0A0A6M386_CANAX; tr|A0A0A6LGT0|A0A0A6LGT0_CANAX; tr|A0A0A6L5Y0|A0A0A6L5Y0_CANAX; tr|A0A0A6L1C0|A0A0A6L1C0_CANAX; tr|A0A0A6KWM0|A0A0A6KWM0_CANAX; tr|A0A0A6K9D4|A0A0A6K9D4_CANAX; tr|A0A0A6K455|A0A0A6K455_CANAX; tr|A0A0A6JWU4|A0A0A6JWU4_CANAX; tr|A0A0A6J9A0|A0A0A6J9A0_CANAX; tr|A0A0A6J199|A0A0A6J19…	Elongation factor 1-alpha OS=Candida albicans (strain WO-1) GN=CAWG_00588 PE=3 SV=1; Elongation factor 1-alpha OS=Candida albicans (strain SC5314 / ATCC MYA-2876) GN=I503_00814 PE=3 SV=1; Elongation factor 1-alpha OS=Candida albicans (strain SC5314 / ATCC MYA-2876) GN=W5Q_02251 PE=3 SV=1; Elongation factor 1-alpha OS=Candida albicans P78042 GN=MGS_00808 PE=3 SV=1; Elongation factor 1-alpha OS=Can…			0	99	SVEMHHEQLAEGVPGDNVGFNVKNVSVKEIR	Oxidation(M)@4; Deamidated(Q)@8; Trimethyl(K)@23	missed K-N@23; missed K-E@28	5.9785e-05	3476.74	870.191	3476.74	870.191	4	25	1.1.1.1887.17	1	21.5412	6557.9	21.6676
1	93.17	93.17	63.97	63.97	63.97	tr|C4YDJ3|C4YDJ3_CANAW; tr|A0A0A6Q741|A0A0A6Q741_CANAL; tr|A0A0A6M7H0|A0A0A6M7H0_CANAL; tr|A0A0A6M386|A0A0A6M386_CANAX; tr|A0A0A6LGT0|A0A0A6LGT0_CANAX; tr|A0A0A6L5Y0|A0A0A6L5Y0_CANAX; tr|A0A0A6L1C0|A0A0A6L1C0_CANAX; tr|A0A0A6KWM0|A0A0A6KWM0_CANAX; tr|A0A0A6K9D4|A0A0A6K9D4_CANAX; tr|A0A0A6K455|A0A0A6K455_CANAX; tr|A0A0A6JWU4|A0A0A6JWU4_CANAX; tr|A0A0A6J9A0|A0A0A6J9A0_CANAX; tr|A0A0A6J199|A0A0A6J19…	Elongation factor 1-alpha OS=Candida albicans (strain WO-1) GN=CAWG_00588 PE=3 SV=1; Elongation factor 1-alpha OS=Candida albicans (strain SC5314 / ATCC MYA-2876) GN=I503_00814 PE=3 SV=1; Elongation factor 1-alpha OS=Candida albicans (strain SC5314 / ATCC MYA-2876) GN=W5Q_02251 PE=3 SV=1; Elongation factor 1-alpha OS=Candida albicans P78042 GN=MGS_00808 PE=3 SV=1; Elongation factor 1-alpha OS=Can…			0	99	SVEMHHEQLAEGVPGDNVGFNVKNVSVKEIR	Oxidation(M)@4; Deamidated(Q)@8; Trimethyl(K)@28	missed K-N@23; missed K-E@28	-0.0105937	3476.73	580.462	3476.74	580.463	6	23	1.1.1.1890.6	1	21.6415	23034.3	21.6286
1	93.17	93.17	63.97	63.97	63.97	tr|C4YDJ3|C4YDJ3_CANAW; tr|A0A0A6Q741|A0A0A6Q741_CANAL; tr|A0A0A6M7H0|A0A0A6M7H0_CANAL; tr|A0A0A6M386|A0A0A6M386_CANAX; tr|A0A0A6LGT0|A0A0A6LGT0_CANAX; tr|A0A0A6L5Y0|A0A0A6L5Y0_CANAX; tr|A0A0A6L1C0|A0A0A6L1C0_CANAX; tr|A0A0A6KWM0|A0A0A6KWM0_CANAX; tr|A0A0A6K9D4|A0A0A6K9D4_CANAX; tr|A0A0A6K455|A0A0A6K455_CANAX; tr|A0A0A6JWU4|A0A0A6JWU4_CANAX; tr|A0A0A6J9A0|A0A0A6J9A0_CANAX; tr|A0A0A6J199|A0A0A6J19…	Elongation factor 1-alpha OS=Candida albicans (strain WO-1) GN=CAWG_00588 PE=3 SV=1; Elongation factor 1-alpha OS=Candida albicans (strain SC5314 / ATCC MYA-2876) GN=I503_00814 PE=3 SV=1; Elongation factor 1-alpha OS=Candida albicans (strain SC5314 / ATCC MYA-2876) GN=W5Q_02251 PE=3 SV=1; Elongation factor 1-alpha OS=Candida albicans P78042 GN=MGS_00808 PE=3 SV=1; Elongation factor 1-alpha OS=Can…			0	99	SVEMHHEQLAEGVPGDNVGFNVKNVSVKEIR	Oxidation(M)@4; Deamidated(Q)@8; Trimethyl(K)@28	missed K-N@23; missed K-E@28	-0.00392056	3476.73	696.354	3476.74	696.354	5	25	1.1.1.1890.11	1	21.6565	23615.6	21.5889
1	93.17	93.17	63.97	63.97	63.97	tr|C4YDJ3|C4YDJ3_CANAW; tr|A0A0A6Q741|A0A0A6Q741_CANAL; tr|A0A0A6M7H0|A0A0A6M7H0_CANAL; tr|A0A0A6M386|A0A0A6M386_CANAX; tr|A0A0A6LGT0|A0A0A6LGT0_CANAX; tr|A0A0A6L5Y0|A0A0A6L5Y0_CANAX; tr|A0A0A6L1C0|A0A0A6L1C0_CANAX; tr|A0A0A6KWM0|A0A0A6KWM0_CANAX; tr|A0A0A6K9D4|A0A0A6K9D4_CANAX; tr|A0A0A6K455|A0A0A6K455_CANAX; tr|A0A0A6JWU4|A0A0A6JWU4_CANAX; tr|A0A0A6J9A0|A0A0A6J9A0_CANAX; tr|A0A0A6J199|A0A0A6J19…	Elongation factor 1-alpha OS=Candida albicans (strain WO-1) GN=CAWG_00588 PE=3 SV=1; Elongation factor 1-alpha OS=Candida albicans (strain SC5314 / ATCC MYA-2876) GN=I503_00814 PE=3 SV=1; Elongation factor 1-alpha OS=Candida albicans (strain SC5314 / ATCC MYA-2876) GN=W5Q_02251 PE=3 SV=1; Elongation factor 1-alpha OS=Candida albicans P78042 GN=MGS_00808 PE=3 SV=1; Elongation factor 1-alpha OS=Can…			0	99	SVEMHHEQLAEGVPGDNVGFNVKNVSVKEIR	Oxidation(M)@4; Deamidated(Q)@8; Trimethyl(K)@23	missed K-N@23; missed K-E@28	5.9785e-05	3476.74	870.191	3476.74	870.191	4	23	1.1.1.1891.16	1	21.6972	6557.9	21.6676
1	93.17	93.17	63.97	63.97	63.97	tr|C4YDJ3|C4YDJ3_CANAW; tr|A0A0A6Q741|A0A0A6Q741_CANAL; tr|A0A0A6M7H0|A0A0A6M7H0_CANAL; tr|A0A0A6M386|A0A0A6M386_CANAX; tr|A0A0A6LGT0|A0A0A6LGT0_CANAX; tr|A0A0A6L5Y0|A0A0A6L5Y0_CANAX; tr|A0A0A6L1C0|A0A0A6L1C0_CANAX; tr|A0A0A6KWM0|A0A0A6KWM0_CANAX; tr|A0A0A6K9D4|A0A0A6K9D4_CANAX; tr|A0A0A6K455|A0A0A6K455_CANAX; tr|A0A0A6JWU4|A0A0A6JWU4_CANAX; tr|A0A0A6J9A0|A0A0A6J9A0_CANAX; tr|A0A0A6J199|A0A0A6J19…	Elongation factor 1-alpha OS=Candida albicans (strain WO-1) GN=CAWG_00588 PE=3 SV=1; Elongation factor 1-alpha OS=Candida albicans (strain SC5314 / ATCC MYA-2876) GN=I503_00814 PE=3 SV=1; Elongation factor 1-alpha OS=Candida albicans (strain SC5314 / ATCC MYA-2876) GN=W5Q_02251 PE=3 SV=1; Elongation factor 1-alpha OS=Candida albicans P78042 GN=MGS_00808 PE=3 SV=1; Elongation factor 1-alpha OS=Can…			0	99	SVEMHHEQLAEGVPGDNVGFNVKNVSVKEIR	Oxidation(M)@4; Deamidated(Q)@8; Trimethyl(K)@28	missed K-N@23; missed K-E@28	5.9785e-05	3476.74	870.191	3476.74	870.191	4	25	1.1.1.1892.11	1	21.7413	6557.9	21.6676
1	93.17	93.17	63.97	63.97	63.97	tr|C4YDJ3|C4YDJ3_CANAW; tr|A0A0A6Q741|A0A0A6Q741_CANAL; tr|A0A0A6M7H0|A0A0A6M7H0_CANAL; tr|A0A0A6M386|A0A0A6M386_CANAX; tr|A0A0A6LGT0|A0A0A6LGT0_CANAX; tr|A0A0A6L5Y0|A0A0A6L5Y0_CANAX; tr|A0A0A6L1C0|A0A0A6L1C0_CANAX; tr|A0A0A6KWM0|A0A0A6KWM0_CANAX; tr|A0A0A6K9D4|A0A0A6K9D4_CANAX; tr|A0A0A6K455|A0A0A6K455_CANAX; tr|A0A0A6JWU4|A0A0A6JWU4_CANAX; tr|A0A0A6J9A0|A0A0A6J9A0_CANAX; tr|A0A0A6J199|A0A0A6J19…	Elongation factor 1-alpha OS=Candida albicans (strain WO-1) GN=CAWG_00588 PE=3 SV=1; Elongation factor 1-alpha OS=Candida albicans (strain SC5314 / ATCC MYA-2876) GN=I503_00814 PE=3 SV=1; Elongation factor 1-alpha OS=Candida albicans (strain SC5314 / ATCC MYA-2876) GN=W5Q_02251 PE=3 SV=1; Elongation factor 1-alpha OS=Candida albicans P78042 GN=MGS_00808 PE=3 SV=1; Elongation factor 1-alpha OS=Can…			0	99	SVEMHHEQLAEGVPGDNVGFNVKNVSVKEIR	Oxidation(M)@4; Deamidated(Q)@8; Trimethyl(K)@28	missed K-N@23; missed K-E@28	-0.0105937	3476.73	580.462	3476.74	580.463	6	24	1.1.1.1893.9	1	21.7637	23034.3	21.6286
1	93.17	93.17	63.97	63.97	63.97	tr|C4YDJ3|C4YDJ3_CANAW; tr|A0A0A6Q741|A0A0A6Q741_CANAL; tr|A0A0A6M7H0|A0A0A6M7H0_CANAL; tr|A0A0A6M386|A0A0A6M386_CANAX; tr|A0A0A6LGT0|A0A0A6LGT0_CANAX; tr|A0A0A6L5Y0|A0A0A6L5Y0_CANAX; tr|A0A0A6L1C0|A0A0A6L1C0_CANAX; tr|A0A0A6KWM0|A0A0A6KWM0_CANAX; tr|A0A0A6K9D4|A0A0A6K9D4_CANAX; tr|A0A0A6K455|A0A0A6K455_CANAX; tr|A0A0A6JWU4|A0A0A6JWU4_CANAX; tr|A0A0A6J9A0|A0A0A6J9A0_CANAX; tr|A0A0A6J199|A0A0A6J19…	Elongation factor 1-alpha OS=Candida albicans (strain WO-1) GN=CAWG_00588 PE=3 SV=1; Elongation factor 1-alpha OS=Candida albicans (strain SC5314 / ATCC MYA-2876) GN=I503_00814 PE=3 SV=1; Elongation factor 1-alpha OS=Candida albicans (strain SC5314 / ATCC MYA-2876) GN=W5Q_02251 PE=3 SV=1; Elongation factor 1-alpha OS=Candida albicans P78042 GN=MGS_00808 PE=3 SV=1; Elongation factor 1-alpha OS=Can…			0	99	SVEMHHEQLAEGVPGDNVGFNVKNVSVKEIR	Oxidation(M)@4; Deamidated(Q)@8; Trimethyl(K)@28	missed K-N@23; missed K-E@28	-0.00392056	3476.73	696.354	3476.74	696.354	5	23	1.1.1.1893.15	1	21.7737	23615.6	21.5889
1	93.17	93.17	63.97	63.97	63.97	tr|C4YDJ3|C4YDJ3_CANAW; tr|A0A0A6Q741|A0A0A6Q741_CANAL; tr|A0A0A6M7H0|A0A0A6M7H0_CANAL; tr|A0A0A6M386|A0A0A6M386_CANAX; tr|A0A0A6LGT0|A0A0A6LGT0_CANAX; tr|A0A0A6L5Y0|A0A0A6L5Y0_CANAX; tr|A0A0A6L1C0|A0A0A6L1C0_CANAX; tr|A0A0A6KWM0|A0A0A6KWM0_CANAX; tr|A0A0A6K9D4|A0A0A6K9D4_CANAX; tr|A0A0A6K455|A0A0A6K455_CANAX; tr|A0A0A6JWU4|A0A0A6JWU4_CANAX; tr|A0A0A6J9A0|A0A0A6J9A0_CANAX; tr|A0A0A6J199|A0A0A6J19…	Elongation factor 1-alpha OS=Candida albicans (strain WO-1) GN=CAWG_00588 PE=3 SV=1; Elongation factor 1-alpha OS=Candida albicans (strain SC5314 / ATCC MYA-2876) GN=I503_00814 PE=3 SV=1; Elongation factor 1-alpha OS=Candida albicans (strain SC5314 / ATCC MYA-2876) GN=W5Q_02251 PE=3 SV=1; Elongation factor 1-alpha OS=Candida albicans P78042 GN=MGS_00808 PE=3 SV=1; Elongation factor 1-alpha OS=Can…			0	99	SVEMHHEQLAEGVPGDNVGFNVKNVSVKEIR	Oxidation(M)@4; Deamidated(Q)@8; Trimethyl(K)@28	missed K-N@23; missed K-E@28	0.00826956	3476.74	1159.92	3476.74	1159.92	3	25	1.1.1.1893.17	1	21.7804	1151.36	21.7067
1	93.17	93.17	63.97	63.97	63.97	tr|C4YDJ3|C4YDJ3_CANAW; tr|A0A0A6Q741|A0A0A6Q741_CANAL; tr|A0A0A6M7H0|A0A0A6M7H0_CANAL; tr|A0A0A6M386|A0A0A6M386_CANAX; tr|A0A0A6LGT0|A0A0A6LGT0_CANAX; tr|A0A0A6L5Y0|A0A0A6L5Y0_CANAX; tr|A0A0A6L1C0|A0A0A6L1C0_CANAX; tr|A0A0A6KWM0|A0A0A6KWM0_CANAX; tr|A0A0A6K9D4|A0A0A6K9D4_CANAX; tr|A0A0A6K455|A0A0A6K455_CANAX; tr|A0A0A6JWU4|A0A0A6JWU4_CANAX; tr|A0A0A6J9A0|A0A0A6J9A0_CANAX; tr|A0A0A6J199|A0A0A6J19…	Elongation factor 1-alpha OS=Candida albicans (strain WO-1) GN=CAWG_00588 PE=3 SV=1; Elongation factor 1-alpha OS=Candida albicans (strain SC5314 / ATCC MYA-2876) GN=I503_00814 PE=3 SV=1; Elongation factor 1-alpha OS=Candida albicans (strain SC5314 / ATCC MYA-2876) GN=W5Q_02251 PE=3 SV=1; Elongation factor 1-alpha OS=Candida albicans P78042 GN=MGS_00808 PE=3 SV=1; Elongation factor 1-alpha OS=Can…			0	99	SVEMHHEQLAEGVPGDNVGFNVKNVSVKEIR	Oxidation(M)@4; Deamidated(N)@21; Trimethyl(K)@28	missed K-N@23; missed K-E@28	-0.0105937	3476.73	580.462	3476.74	580.463	6	23	1.1.1.1896.11	1	21.885	23034.3	21.6286
1	93.17	93.17	63.97	63.97	63.97	tr|C4YDJ3|C4YDJ3_CANAW; tr|A0A0A6Q741|A0A0A6Q741_CANAL; tr|A0A0A6M7H0|A0A0A6M7H0_CANAL; tr|A0A0A6M386|A0A0A6M386_CANAX; tr|A0A0A6LGT0|A0A0A6LGT0_CANAX; tr|A0A0A6L5Y0|A0A0A6L5Y0_CANAX; tr|A0A0A6L1C0|A0A0A6L1C0_CANAX; tr|A0A0A6KWM0|A0A0A6KWM0_CANAX; tr|A0A0A6K9D4|A0A0A6K9D4_CANAX; tr|A0A0A6K455|A0A0A6K455_CANAX; tr|A0A0A6JWU4|A0A0A6JWU4_CANAX; tr|A0A0A6J9A0|A0A0A6J9A0_CANAX; tr|A0A0A6J199|A0A0A6J19…	Elongation factor 1-alpha OS=Candida albicans (strain WO-1) GN=CAWG_00588 PE=3 SV=1; Elongation factor 1-alpha OS=Candida albicans (strain SC5314 / ATCC MYA-2876) GN=I503_00814 PE=3 SV=1; Elongation factor 1-alpha OS=Candida albicans (strain SC5314 / ATCC MYA-2876) GN=W5Q_02251 PE=3 SV=1; Elongation factor 1-alpha OS=Candida albicans P78042 GN=MGS_00808 PE=3 SV=1; Elongation factor 1-alpha OS=Can…			0	99	SVEMHHEQLAEGVPGDNVGFNVKNVSVKEIR	Oxidation(M)@4; Deamidated(N)@21; Trimethyl(K)@28	missed K-N@23; missed K-E@28	-0.00269989	3476.73	696.354	3476.74	696.354	5	25	1.1.1.1896.16	1	21.8933	20081.8	21.9028
1	93.17	93.17	63.97	63.97	63.97	tr|C4YDJ3|C4YDJ3_CANAW; tr|A0A0A6Q741|A0A0A6Q741_CANAL; tr|A0A0A6M7H0|A0A0A6M7H0_CANAL; tr|A0A0A6M386|A0A0A6M386_CANAX; tr|A0A0A6LGT0|A0A0A6LGT0_CANAX; tr|A0A0A6L5Y0|A0A0A6L5Y0_CANAX; tr|A0A0A6L1C0|A0A0A6L1C0_CANAX; tr|A0A0A6KWM0|A0A0A6KWM0_CANAX; tr|A0A0A6K9D4|A0A0A6K9D4_CANAX; tr|A0A0A6K455|A0A0A6K455_CANAX; tr|A0A0A6JWU4|A0A0A6JWU4_CANAX; tr|A0A0A6J9A0|A0A0A6J9A0_CANAX; tr|A0A0A6J199|A0A0A6J19…	Elongation factor 1-alpha OS=Candida albicans (strain WO-1) GN=CAWG_00588 PE=3 SV=1; Elongation factor 1-alpha OS=Candida albicans (strain SC5314 / ATCC MYA-2876) GN=I503_00814 PE=3 SV=1; Elongation factor 1-alpha OS=Candida albicans (strain SC5314 / ATCC MYA-2876) GN=W5Q_02251 PE=3 SV=1; Elongation factor 1-alpha OS=Candida albicans P78042 GN=MGS_00808 PE=3 SV=1; Elongation factor 1-alpha OS=Can…			0	99	SVEMHHEQLAEGVPGDNVGFNVKNVSVKEIR	Oxidation(M)@4; Deamidated(N)@24; Trimethyl(K)@28	missed K-N@23; missed K-E@28	-0.00912886	3476.73	580.462	3476.74	580.463	6	23	1.1.1.1899.14	1	22.0099	16913.3	21.9426
1	93.17	93.17	63.97	63.97	63.97	tr|C4YDJ3|C4YDJ3_CANAW; tr|A0A0A6Q741|A0A0A6Q741_CANAL; tr|A0A0A6M7H0|A0A0A6M7H0_CANAL; tr|A0A0A6M386|A0A0A6M386_CANAX; tr|A0A0A6LGT0|A0A0A6LGT0_CANAX; tr|A0A0A6L5Y0|A0A0A6L5Y0_CANAX; tr|A0A0A6L1C0|A0A0A6L1C0_CANAX; tr|A0A0A6KWM0|A0A0A6KWM0_CANAX; tr|A0A0A6K9D4|A0A0A6K9D4_CANAX; tr|A0A0A6K455|A0A0A6K455_CANAX; tr|A0A0A6JWU4|A0A0A6JWU4_CANAX; tr|A0A0A6J9A0|A0A0A6J9A0_CANAX; tr|A0A0A6J199|A0A0A6J19…	Elongation factor 1-alpha OS=Candida albicans (strain WO-1) GN=CAWG_00588 PE=3 SV=1; Elongation factor 1-alpha OS=Candida albicans (strain SC5314 / ATCC MYA-2876) GN=I503_00814 PE=3 SV=1; Elongation factor 1-alpha OS=Candida albicans (strain SC5314 / ATCC MYA-2876) GN=W5Q_02251 PE=3 SV=1; Elongation factor 1-alpha OS=Candida albicans P78042 GN=MGS_00808 PE=3 SV=1; Elongation factor 1-alpha OS=Can…			0	99	SVEMHHEQLAEGVPGDNVGFNVKNVSVKEIR	Oxidation(M)@4; Deamidated(N)@21; Trimethyl(K)@28	missed K-N@23; missed K-E@28	-0.00269989	3476.73	696.354	3476.74	696.354	5	25	1.1.1.1899.18	1	22.0165	20081.8	21.9028
1	93.17	93.17	63.97	63.97	63.97	tr|C4YDJ3|C4YDJ3_CANAW; tr|A0A0A6Q741|A0A0A6Q741_CANAL; tr|A0A0A6M7H0|A0A0A6M7H0_CANAL; tr|A0A0A6M386|A0A0A6M386_CANAX; tr|A0A0A6LGT0|A0A0A6LGT0_CANAX; tr|A0A0A6L5Y0|A0A0A6L5Y0_CANAX; tr|A0A0A6L1C0|A0A0A6L1C0_CANAX; tr|A0A0A6KWM0|A0A0A6KWM0_CANAX; tr|A0A0A6K9D4|A0A0A6K9D4_CANAX; tr|A0A0A6K455|A0A0A6K455_CANAX; tr|A0A0A6JWU4|A0A0A6JWU4_CANAX; tr|A0A0A6J9A0|A0A0A6J9A0_CANAX; tr|A0A0A6J199|A0A0A6J19…	Elongation factor 1-alpha OS=Candida albicans (strain WO-1) GN=CAWG_00588 PE=3 SV=1; Elongation factor 1-alpha OS=Candida albicans (strain SC5314 / ATCC MYA-2876) GN=I503_00814 PE=3 SV=1; Elongation factor 1-alpha OS=Candida albicans (strain SC5314 / ATCC MYA-2876) GN=W5Q_02251 PE=3 SV=1; Elongation factor 1-alpha OS=Candida albicans P78042 GN=MGS_00808 PE=3 SV=1; Elongation factor 1-alpha OS=Can…			0	99	SVEMHHEQLAEGVPGDNVGFNVKNVSVKEIR	Oxidation(M)@4; Deamidated(N)@24; Trimethyl(K)@28	missed K-N@23; missed K-E@28	-0.00912886	3476.73	580.462	3476.74	580.463	6	21	1.1.1.1902.12	1	22.1265	16913.3	21.9426
1	93.17	93.17	63.97	63.97	63.97	tr|C4YDJ3|C4YDJ3_CANAW; tr|A0A0A6Q741|A0A0A6Q741_CANAL; tr|A0A0A6M7H0|A0A0A6M7H0_CANAL; tr|A0A0A6M386|A0A0A6M386_CANAX; tr|A0A0A6LGT0|A0A0A6LGT0_CANAX; tr|A0A0A6L5Y0|A0A0A6L5Y0_CANAX; tr|A0A0A6L1C0|A0A0A6L1C0_CANAX; tr|A0A0A6KWM0|A0A0A6KWM0_CANAX; tr|A0A0A6K9D4|A0A0A6K9D4_CANAX; tr|A0A0A6K455|A0A0A6K455_CANAX; tr|A0A0A6JWU4|A0A0A6JWU4_CANAX; tr|A0A0A6J9A0|A0A0A6J9A0_CANAX; tr|A0A0A6J199|A0A0A6J19…	Elongation factor 1-alpha OS=Candida albicans (strain WO-1) GN=CAWG_00588 PE=3 SV=1; Elongation factor 1-alpha OS=Candida albicans (strain SC5314 / ATCC MYA-2876) GN=I503_00814 PE=3 SV=1; Elongation factor 1-alpha OS=Candida albicans (strain SC5314 / ATCC MYA-2876) GN=W5Q_02251 PE=3 SV=1; Elongation factor 1-alpha OS=Candida albicans P78042 GN=MGS_00808 PE=3 SV=1; Elongation factor 1-alpha OS=Can…			0	99	SVEMHHEQLAEGVPGDNVGFNVKNVSVKEIR	Oxidation(M)@4; Deamidated(N)@21; Trimethyl(K)@28	missed K-N@23; missed K-E@28	-0.00269989	3476.73	696.354	3476.74	696.354	5	22	1.1.1.1902.17	1	22.1348	20081.8	21.9028
1	93.17	93.17	63.97	63.97	63.97	tr|C4YDJ3|C4YDJ3_CANAW; tr|A0A0A6Q741|A0A0A6Q741_CANAL; tr|A0A0A6M7H0|A0A0A6M7H0_CANAL; tr|A0A0A6M386|A0A0A6M386_CANAX; tr|A0A0A6LGT0|A0A0A6LGT0_CANAX; tr|A0A0A6L5Y0|A0A0A6L5Y0_CANAX; tr|A0A0A6L1C0|A0A0A6L1C0_CANAX; tr|A0A0A6KWM0|A0A0A6KWM0_CANAX; tr|A0A0A6K9D4|A0A0A6K9D4_CANAX; tr|A0A0A6K455|A0A0A6K455_CANAX; tr|A0A0A6JWU4|A0A0A6JWU4_CANAX; tr|A0A0A6J9A0|A0A0A6J9A0_CANAX; tr|A0A0A6J199|A0A0A6J19…	Elongation factor 1-alpha OS=Candida albicans (strain WO-1) GN=CAWG_00588 PE=3 SV=1; Elongation factor 1-alpha OS=Candida albicans (strain SC5314 / ATCC MYA-2876) GN=I503_00814 PE=3 SV=1; Elongation factor 1-alpha OS=Candida albicans (strain SC5314 / ATCC MYA-2876) GN=W5Q_02251 PE=3 SV=1; Elongation factor 1-alpha OS=Candida albicans P78042 GN=MGS_00808 PE=3 SV=1; Elongation factor 1-alpha OS=Can…			0	99	SVEMHHEQLAEGVPGDNVGFNVKNVSVKEIR	Oxidation(M)@4; Deamidated(N)@21; Trimethyl(K)@28	missed K-N@23; missed K-E@28	-0.0105937	3476.73	580.462	3476.74	580.463	6	21	1.1.1.1905.10	1	22.242	17966	21.8238
1	93.17	93.17	63.97	63.97	63.97	tr|C4YDJ3|C4YDJ3_CANAW; tr|A0A0A6Q741|A0A0A6Q741_CANAL; tr|A0A0A6M7H0|A0A0A6M7H0_CANAL; tr|A0A0A6M386|A0A0A6M386_CANAX; tr|A0A0A6LGT0|A0A0A6LGT0_CANAX; tr|A0A0A6L5Y0|A0A0A6L5Y0_CANAX; tr|A0A0A6L1C0|A0A0A6L1C0_CANAX; tr|A0A0A6KWM0|A0A0A6KWM0_CANAX; tr|A0A0A6K9D4|A0A0A6K9D4_CANAX; tr|A0A0A6K455|A0A0A6K455_CANAX; tr|A0A0A6JWU4|A0A0A6JWU4_CANAX; tr|A0A0A6J9A0|A0A0A6J9A0_CANAX; tr|A0A0A6J199|A0A0A6J19…	Elongation factor 1-alpha OS=Candida albicans (strain WO-1) GN=CAWG_00588 PE=3 SV=1; Elongation factor 1-alpha OS=Candida albicans (strain SC5314 / ATCC MYA-2876) GN=I503_00814 PE=3 SV=1; Elongation factor 1-alpha OS=Candida albicans (strain SC5314 / ATCC MYA-2876) GN=W5Q_02251 PE=3 SV=1; Elongation factor 1-alpha OS=Candida albicans P78042 GN=MGS_00808 PE=3 SV=1; Elongation factor 1-alpha OS=Can…			0	99	SVEMHHEQLAEGVPGDNVGFNVKNVSVKEIR	Oxidation(M)@4; Deamidated(N)@21; Trimethyl(K)@28	missed K-N@23; missed K-E@28	-0.00269989	3476.73	696.354	3476.74	696.354	5	21	1.1.1.1905.16	1	22.252	20081.8	21.9028
1	93.17	93.17	63.97	63.97	63.97	tr|C4YDJ3|C4YDJ3_CANAW; tr|A0A0A6Q741|A0A0A6Q741_CANAL; tr|A0A0A6M7H0|A0A0A6M7H0_CANAL; tr|A0A0A6M386|A0A0A6M386_CANAX; tr|A0A0A6LGT0|A0A0A6LGT0_CANAX; tr|A0A0A6L5Y0|A0A0A6L5Y0_CANAX; tr|A0A0A6L1C0|A0A0A6L1C0_CANAX; tr|A0A0A6KWM0|A0A0A6KWM0_CANAX; tr|A0A0A6K9D4|A0A0A6K9D4_CANAX; tr|A0A0A6K455|A0A0A6K455_CANAX; tr|A0A0A6JWU4|A0A0A6JWU4_CANAX; tr|A0A0A6J9A0|A0A0A6J9A0_CANAX; tr|A0A0A6J199|A0A0A6J19…	Elongation factor 1-alpha OS=Candida albicans (strain WO-1) GN=CAWG_00588 PE=3 SV=1; Elongation factor 1-alpha OS=Candida albicans (strain SC5314 / ATCC MYA-2876) GN=I503_00814 PE=3 SV=1; Elongation factor 1-alpha OS=Candida albicans (strain SC5314 / ATCC MYA-2876) GN=W5Q_02251 PE=3 SV=1; Elongation factor 1-alpha OS=Candida albicans P78042 GN=MGS_00808 PE=3 SV=1; Elongation factor 1-alpha OS=Can…			0	99	SVEMHHEQLAEGVPGDNVGFNVKNVSVKEIR	Oxidation(M)@4; Deamidated(N)@21; Trimethyl(K)@28	missed K-N@23; missed K-E@28	-0.00269989	3476.73	696.354	3476.74	696.354	5	20	1.1.1.1908.15	1	22.3678	18860.6	21.9426
1	93.17	93.17	63.97	63.97	63.97	tr|C4YDJ3|C4YDJ3_CANAW; tr|A0A0A6Q741|A0A0A6Q741_CANAL; tr|A0A0A6M7H0|A0A0A6M7H0_CANAL; tr|A0A0A6M386|A0A0A6M386_CANAX; tr|A0A0A6LGT0|A0A0A6LGT0_CANAX; tr|A0A0A6L5Y0|A0A0A6L5Y0_CANAX; tr|A0A0A6L1C0|A0A0A6L1C0_CANAX; tr|A0A0A6KWM0|A0A0A6KWM0_CANAX; tr|A0A0A6K9D4|A0A0A6K9D4_CANAX; tr|A0A0A6K455|A0A0A6K455_CANAX; tr|A0A0A6JWU4|A0A0A6JWU4_CANAX; tr|A0A0A6J9A0|A0A0A6J9A0_CANAX; tr|A0A0A6J199|A0A0A6J19…	Elongation factor 1-alpha OS=Candida albicans (strain WO-1) GN=CAWG_00588 PE=3 SV=1; Elongation factor 1-alpha OS=Candida albicans (strain SC5314 / ATCC MYA-2876) GN=I503_00814 PE=3 SV=1; Elongation factor 1-alpha OS=Candida albicans (strain SC5314 / ATCC MYA-2876) GN=W5Q_02251 PE=3 SV=1; Elongation factor 1-alpha OS=Candida albicans P78042 GN=MGS_00808 PE=3 SV=1; Elongation factor 1-alpha OS=Can…			0	99	SVEMHHEQLAEGVPGDNVGFNVKNVSVKEIR	Trimethyl(K)@28	missed K-N@23; missed K-E@28	-0.00294625	3459.75	692.958	3459.76	692.959	5	17	1.1.1.1898.18	1	21.9765	1324.77	21.9826
1	93.17	93.17	63.97	63.97	63.97	tr|C4YDJ3|C4YDJ3_CANAW; tr|A0A0A6Q741|A0A0A6Q741_CANAL; tr|A0A0A6M7H0|A0A0A6M7H0_CANAL; tr|A0A0A6M386|A0A0A6M386_CANAX; tr|A0A0A6LGT0|A0A0A6LGT0_CANAX; tr|A0A0A6L5Y0|A0A0A6L5Y0_CANAX; tr|A0A0A6L1C0|A0A0A6L1C0_CANAX; tr|A0A0A6KWM0|A0A0A6KWM0_CANAX; tr|A0A0A6K9D4|A0A0A6K9D4_CANAX; tr|A0A0A6K455|A0A0A6K455_CANAX; tr|A0A0A6JWU4|A0A0A6JWU4_CANAX; tr|A0A0A6J9A0|A0A0A6J9A0_CANAX; tr|A0A0A6J199|A0A0A6J19…	Elongation factor 1-alpha OS=Candida albicans (strain WO-1) GN=CAWG_00588 PE=3 SV=1; Elongation factor 1-alpha OS=Candida albicans (strain SC5314 / ATCC MYA-2876) GN=I503_00814 PE=3 SV=1; Elongation factor 1-alpha OS=Candida albicans (strain SC5314 / ATCC MYA-2876) GN=W5Q_02251 PE=3 SV=1; Elongation factor 1-alpha OS=Candida albicans P78042 GN=MGS_00808 PE=3 SV=1; Elongation factor 1-alpha OS=Can…			0	99	SVEMHHEQLAEGVPGDNVGFNVKNVSVKEIR	Oxidation(M)@4; Deamidated(N)@21; Trimethyl(K)@28	missed K-N@23; missed K-E@28	0.00826956	3476.74	1159.92	3476.74	1159.92	3	17	1.1.1.1896.19	1	21.8983	1151.36	21.7067
1	93.17	93.17	63.97	63.97	63.97	tr|C4YDJ3|C4YDJ3_CANAW; tr|A0A0A6Q741|A0A0A6Q741_CANAL; tr|A0A0A6M7H0|A0A0A6M7H0_CANAL; tr|A0A0A6M386|A0A0A6M386_CANAX; tr|A0A0A6LGT0|A0A0A6LGT0_CANAX; tr|A0A0A6L5Y0|A0A0A6L5Y0_CANAX; tr|A0A0A6L1C0|A0A0A6L1C0_CANAX; tr|A0A0A6KWM0|A0A0A6KWM0_CANAX; tr|A0A0A6K9D4|A0A0A6K9D4_CANAX; tr|A0A0A6K455|A0A0A6K455_CANAX; tr|A0A0A6JWU4|A0A0A6JWU4_CANAX; tr|A0A0A6J9A0|A0A0A6J9A0_CANAX; tr|A0A0A6J199|A0A0A6J19…	Elongation factor 1-alpha OS=Candida albicans (strain WO-1) GN=CAWG_00588 PE=3 SV=1; Elongation factor 1-alpha OS=Candida albicans (strain SC5314 / ATCC MYA-2876) GN=I503_00814 PE=3 SV=1; Elongation factor 1-alpha OS=Candida albicans (strain SC5314 / ATCC MYA-2876) GN=W5Q_02251 PE=3 SV=1; Elongation factor 1-alpha OS=Candida albicans P78042 GN=MGS_00808 PE=3 SV=1; Elongation factor 1-alpha OS=Can…			0	98.77	SVEMHHEQLAEGVPGDNVGFNVKNVSVKEIR	Oxidation(M)@4; Trimethyl(K)@28	missed K-N@23; missed K-E@28	-0.0145875	3475.74	580.297	3475.75	580.299	6	13	1.1.1.1863.12	1	20.5788	95206.4	20.9149
[truncated: 6,571 more rows]

## Sheet: Uninduced Replicate 2 Protein
N	Unused	Total	%Cov	%Cov(50)	%Cov(95)	Accession	Name	Species	Peptides(95%)
1	19.58	19.58	34.85	34.85	28.7	tr|V5UZY2|V5UZY2_CANAX	Enolase (Fragment) OS=Candida albicans PE=3 SV=1	CANAX	11
1	0	19.58	34.77	34.77	28.64	tr|C4YDI1|C4YDI1_CANAW	Enolase OS=Candida albicans (strain WO-1) GN=CAWG_00576 PE=3 SV=1	CANAW	11
[truncated: 5,376 more rows]

## Sheet: Uninduced Replicate 2 Peptides
N	Unused	Total	%Cov	%Cov(50)	%Cov(95)	Accessions	Names	Used	Annotation	Contrib	Conf	Sequence	Modifications	ProteinModifications	Cleavages	dMass	Obs MW	Obs m/z	Theor MW	Theor m/z	Theor z	Sc	Spectrum	Acq Time	Intensity (Peptide)	PrecursorIntensityAcquisition	Apex Time (Peptide)	Elution Peak Width (Peptide)	MS2Counts
[truncated: 2,001 more rows]

[truncated: 16 more sheets: GlcNAC Replicate 1 Protein, GlcNAC Replicate 1 Peptide, GlcNAC Replicate 2 Protein, GlcNAC Replicate 2 Peptide, Serum Replicate 1 Protein, Serum Replicate 1 Peptide, Serum Replicate 2 Protein, Serum Replicate 2 Peptide, Temp Control Replicate1 Protein, Temp Control Replicate1 Peptide, Temp Control Replicate2 Protein, Temp Control Replicate2 Peptide, Temperature Replicate 1 Protein, Temperature Replicate 1 Peptide, Temperature Replicate 2 Protein, Temperature Replicate 2 Peptide]
